# Supplementary material
Source: HighWire-hosted journal article supplement (doi:10.1101/rna.076414.120)
Supplement: Supplemental_Legends.docx [file Supplemental_Legends.docx]

**SUPPLEMENTAL DATA STATEMENT**

**Supplemental_Fig_S1.pdf**SL2-type stem-loop III motif conservation across multiple nematode clades. **Supplemental_Fig_S2.pdf**
Multivariate analysis of genome-wide locations of *trans*-splicing events highlights possible functional subdivision among SL2-type *trans*-spliced leaders in *T. spiralis*

**Supplemental_Table_S1.xlsx**
Detailed summaries of RNA-Seq read statistics, *Tsp*-SL read-screening, genome mapping and read quantification results for each screening (10 bp or 8 bp minimum tail overlap) and set of gene annotations.

**Supplemental_Table_S2.xlsx**
Detailed summaries of genome annotations (reference annotation and four *de novo* annotations), gene classification by *Tsp*-SL *trans*-splicing events and operon prediction across all 20 datasets.

**Supplemental_Table_S3.xlsx**Transcripts derived from *T. spiralis* predicted, downstream, operonic genes show strict association with SL2-type *trans*-splicing.

**Supplemental_Table_S4.xlsx**Prediction of poly(A) sites in the *T. spiralis* genome and association with intercistronic regions.

**Supplemental_Table_S5.xlsx**Ur motif identification in the *T. spiralis* genome and association with intercistronic regions.

**Supplemental_Table_S6.xlsx**Detailed accounts of genome-wide operon synteny between *T. spiralis* and *C. elegans*.

**Supplemental_Table_S7.xlsx**
Identification of operonic germline genes in *T. spiralis* via orthology to *C. elegans*.

**Supplemental_Table_S8.xlsx**GeneOntology annotation and enrichment of operonic genes.
