# Supplementary material
Source: HighWire-hosted journal article supplement (doi:10.1101/rna.076414.120)
Supplement: Supplemental_Table_S1.xlsx [file Supplemental_Table_S1.xlsx]

## Sheet: Legend
Supplementary Table S1. Detailed summaries of RNA-Seq read statistics, Tsp-SL read-screening, genome mapping and read quantification results for each screening (10 bp or 8 bp minimum tail overlap) and set of gene annotations. Results are broken down for each of the three replicate RNA-Seq libraries and each of the 15 Tsp-SL types. The quantification results detail the numbers of alignments that w…

## Sheet: Read statistics
	LIB7135	LIB7136	LIB7137	Total
read pairs	68557151	63199696	69408020	201164867
mapped	0.8844	0.8807	0.8641	0.8762
properly paired	0.8511	0.8476	0.8276	0.8419
Tsp-SL candidate pairs	1914678	1777562	2047880	5740120
	0.0279282	0.0281261	0.0295049	0.0285344
10 bp minimum overlap
Tsp-SL1: 5'-AGGTATTTACCAGATCTAAAAG	5052	4874	3827	13753	6.83668e-05
Tsp-SL2: 5'-AGGTATTTACCGAATTAAAAAG	5762	6281	4472	16515	8.20968e-05
Tsp-SL3: 5'-GGTTATTTACCGAACTTAAAAG	19557	18483	16826	54866	0.000272741
Tsp-SL4: 5'-GCGATTGTTCGAATTTACTTGAAG	15722	16256	15461	47439	0.000235821
Tsp-SL5: 5'-AAATACCTTTCAATTTGTTTGAAG	1889	2435	2237	6561	3.2615e-05
Tsp-SL6: 5'-AACCTTTGCGCATCGTTTAAAG	13655	17055	11730	42440	0.000210971
Tsp-SL7: 5'-AACCTGCACGACTTGTTCGAAG	18306	18453	19491	56250	0.000279621
Tsp-SL8: 5'-ATCTGTCGGTATTCCTGAAAG	1365	1053	798	3216	1.59869e-05
Tsp-SL9: 5'-AGACGTGGTTATTTATTGAAG	397	487	406	1290	6.41265e-06
Tsp-SL10: 5'-GGTAATATTTACTGAATTCAAG	5100	4902	4923	14925	7.41929e-05
Tsp-SL11: 5'-AACCTTTGAACCCACTTCAAG	20130	20282	18426	58838	0.000292486
Tsp-SL12: 5'-ACGAATTTACCGTATTTGTCAAG	10786	10473	8755	30014	0.000149201
Tsp-SL13: 5'-TACCATTCAATTTATTTTGAAG	640	682	706	2028	1.00813e-05
Tsp-SL14: 5'-TACCGTTCAATTAATTTTGAAG	1014	958	1001	2973	1.47789e-05
Tsp-SL15: 5'-TACCGTTCAATTCATTTTGAAG	486	504	626	1616	8.03321e-06
Total Tsp-SL	119861	123178	109685	352724	0.00175341
% total	0.00174834	0.00194903	0.00158029	0.00175341
% candidates	0.0626011	0.069296	0.0535603	0.0614489
8 bp minimum overlap
Tsp-SL1: 5'-AGGTATTTACCAGATCTAAAAG	6059	6007	4564	16630	8.26685e-05
Tsp-SL2: 5'-AGGTATTTACCGAATTAAAAAG	11469	12426	8619	32514	0.000161629
Tsp-SL3: 5'-GGTTATTTACCGAACTTAAAAG	32022	30907	28983	91912	0.000456899
Tsp-SL4: 5'-GCGATTGTTCGAATTTACTTGAAG	16480	17099	16151	49730	0.00024721
Tsp-SL5: 5'-AAATACCTTTCAATTTGTTTGAAG	3293	3875	4073	11241	5.58795e-05
Tsp-SL6: 5'-AACCTTTGCGCATCGTTTAAAG	31355	36258	30117	97730	0.00048582
Tsp-SL7: 5'-AACCTGCACGACTTGTTCGAAG	22904	22865	24254	70023	0.000348088
Tsp-SL8: 5'-ATCTGTCGGTATTCCTGAAAG	4221	3202	2668	10091	5.01628e-05
Tsp-SL9: 5'-AGACGTGGTTATTTATTGAAG	533	613	576	1722	8.56014e-06
Tsp-SL10: 5'-GGTAATATTTACTGAATTCAAG	6335	6121	6133	18589	9.24068e-05
Tsp-SL11: 5'-AACCTTTGAACCCACTTCAAG	22269	22554	20481	65304	0.000324629
Tsp-SL12: 5'-ACGAATTTACCGTATTTGTCAAG	12881	12128	10295	35304	0.000175498
Tsp-SL13: 5'-TACCATTCAATTTATTTTGAAG	2100	2105	2567	6772	3.36639e-05
Tsp-SL14: 5'-TACCGTTCAATTAATTTTGAAG	1111	1047	1086	3244	1.61261e-05
Tsp-SL15: 5'-TACCGTTCAATTCATTTTGAAG	588	683	769	2040	1.01409e-05
Total Tsp-SL	173620	177890	161336	512846	0.00254938
% total	0.00253249	0.00281473	0.00232446	0.00254938
% candidates	0.0906784	0.100075	0.078782	0.0893441
		Tsp-SL13, 14 and 15 are not reliably distinguishable at 8 bp stringency.

## Sheet: Alignment
	LIB7135						LIB7136						LIB7137
10 bp minimum overlap
	Read pairs	Mapped		Properly paired			Read pairs	Mapped		Properly paired			Read pairs	Mapped		Properly paired
Tsp-SL1	5052	10745	0.9822	9570	0.9471		4874	10375	0.9799	9204	0.9442		3827	8026	0.9785	7178	0.9378
Tsp-SL2	5762	12584	0.979	10874	0.9436		6281	13602	0.9769	11782	0.9379		4472	9716	0.9807	8360	0.9347
Tsp-SL3	19557	41521	0.9846	37542	0.9598		18483	39368	0.9862	35544	0.9615		16826	35841	0.9843	32126	0.9547
Tsp-SL4	15722	33209	0.985	30238	0.9616		16256	34654	0.9851	31180	0.959		15461	32900	0.985	29562	0.956
Tsp-SL5	1889	3893	0.9684	3502	0.9269		2435	5043	0.9758	4592	0.9429		2237	4707	0.9725	4168	0.9316
Tsp-SL6	13655	28749	0.9844	26212	0.9598		17055	36341	0.9855	32772	0.9608		11730	25001	0.9845	22380	0.954
Tsp-SL7	18306	38843	0.9857	35272	0.9634		18453	39246	0.9851	35426	0.9599		19491	41692	0.9865	37310	0.9571
Tsp-SL8	1365	2905	0.9801	2588	0.948		1053	2221	0.9797	1978	0.9392		798	1699	0.9815	1492	0.9348
Tsp-SL9	397	806	0.9723	714	0.8992		487	1042	0.9738	888	0.9117		406	844	0.9712	732	0.9015
Tsp-SL10	5100	11597	0.98	9646	0.9457		4902	11093	0.9798	9260	0.9445		4923	11225	0.9809	9294	0.9439
Tsp-SL11	20130	42943	0.9871	38890	0.966		20282	43371	0.9873	39068	0.9631		18426	39437	0.9878	35470	0.9625
Tsp-SL12	10786	24761	0.9852	20638	0.9567		10473	23871	0.9835	19996	0.9546		8755	19951	0.9823	16608	0.9485
Tsp-SL13	640	1362	0.9701	1182	0.9234		682	1448	0.9718	1262	0.9252		706	1486	0.9587	1260	0.8924
Tsp-SL14	1014	2075	0.9593	1848	0.9112		958	1999	0.9709	1776	0.9269		1001	2050	0.9495	1742	0.8701
Tsp-SL15	486	1009	0.9628	892	0.9177		504	1051	0.9616	916	0.9087		626	1300	0.9665	1150	0.9185
8 bp minimum overlap
Tsp-SL1	6059	12862	0.9818	11480	0.9474		6007	12744	0.9794	11348	0.9446		4564	9567	0.9775	8558	0.9376
Tsp-SL2	11469	24803	0.9802	21754	0.9484		12426	26835	0.9806	23568	0.9483		8619	18440	0.9786	16192	0.9393
Tsp-SL3	32022	68155	0.989	62110	0.9698		30907	65784	0.9894	59918	0.9693		28983	61787	0.9885	55904	0.9644
Tsp-SL4	16480	34796	0.9851	31712	0.9621		17099	36410	0.9847	32766	0.9581		16151	34349	0.9849	30878	0.9559
Tsp-SL5	3293	6670	0.9499	5872	0.8916		3875	7915	0.9602	7086	0.9143		4073	8381	0.9507	7234	0.888
Tsp-SL6	31355	66682	0.9884	60740	0.9686		36258	77373	0.989	70250	0.9688		30117	64309	0.9886	58106	0.9647
Tsp-SL7	22904	48686	0.9854	44094	0.9626		22865	48721	0.9859	43984	0.9618		24254	51993	0.9864	46484	0.9583
Tsp-SL8	4221	8892	0.975	7928	0.9391		3202	6692	0.9762	6014	0.9391		2668	5632	0.9761	4994	0.9359
Tsp-SL9	533	1058	0.9297	864	0.8105		613	1260	0.9347	1022	0.8336		576	1137	0.9155	912	0.7917
Tsp-SL10	6335	15994	0.9769	11832	0.9339		6121	15463	0.9768	11394	0.9307		6133	15561	0.9745	11322	0.923
Tsp-SL11	22269	47426	0.9859	42868	0.9625		22554	48154	0.9859	43282	0.9595		20481	43697	0.9856	39248	0.9582
Tsp-SL12	12881	29461	0.9821	24466	0.9497		12128	27662	0.9816	23070	0.9511		10295	23397	0.9779	19326	0.9386
Tsp-SL13	2100	4319	0.9596	3824	0.9105		2105	4322	0.9526	3764	0.8941		2567	5240	0.951	4526	0.8816
Tsp-SL14	1111	2235	0.9414	1946	0.8758		1047	2143	0.9512	1854	0.8854		1086	2186	0.9338	1820	0.8379
Tsp-SL15	588	1170	0.9256	990	0.8418		683	1409	0.9393	1176	0.8609		769	1549	0.9281	1292	0.8401
Tsp-SL13, 14 and 15 are not reliably distinguishable at 8 bp minimum overlap.
Min			0.9256		0.8105				0.9347		0.8336				0.9155		0.7917
Max			0.989		0.9698				0.9894		0.9693				0.9886		0.9647

## Sheet: Quantification (reference)
			Exons		Genes					Exons	Genes
8bp overlap		Total alignments	Assigned	%	Assigned	%	Unassigned_Unmapped	Unassigned_MultiMapping	Unassigned_NoFeatures	Unassigned_Ambiguity	Unassigned_Ambiguity
LIB7135	Tsp-SL10	8217	4232	0.51503	4241	0.516125	214	2749	1013	9	0
LIB7135	Tsp-SL11	24051	16774	0.697435	16781	0.697726	326	3080	3863	8	1
LIB7135	Tsp-SL12	14986	8522	0.568664	8539	0.569798	319	3455	2673	17	0
LIB7135	Tsp-SL13	2241	1406	0.627398	1406	0.627398	142	241	452	0	0
LIB7135	Tsp-SL14	1184	794	0.670608	794	0.670608	106	131	153	0	0
LIB7135	Tsp-SL15	627	403	0.642743	403	0.642743	81	67	76	0	0
LIB7135	Tsp-SL1	6551	4445	0.678522	4446	0.678675	98	852	1155	1	0
LIB7135	Tsp-SL2	12646	8142	0.64384	8152	0.644631	252	2014	2228	10	0
LIB7135	Tsp-SL3	34455	23968	0.695632	23985	0.696125	330	4256	5884	17	0
LIB7135	Tsp-SL4	17664	12475	0.706239	12480	0.706522	271	2106	2807	5	0
LIB7135	Tsp-SL5	3502	2269	0.647915	2269	0.647915	261	373	599	0	0
LIB7135	Tsp-SL6	33723	23863	0.707618	23875	0.707974	429	4088	5331	12	0
LIB7135	Tsp-SL7	24715	17256	0.698199	17262	0.698442	350	3151	3952	6	0
LIB7135	Tsp-SL8	4559	3089	0.677561	3091	0.678	115	583	770	2	0
LIB7135	Tsp-SL9	565	325	0.575221	325	0.575221	74	53	113	0	0
LIB7136	Tsp-SL10	7925	4005	0.505363	4013	0.506372	207	2638	1067	8	0
LIB7136	Tsp-SL11	24423	16835	0.689309	16841	0.689555	304	3218	4060	6	0
LIB7136	Tsp-SL12	14092	8006	0.568124	8018	0.568975	272	3238	2564	12	0
LIB7136	Tsp-SL13	2259	1373	0.607791	1373	0.607791	172	252	462	0	0
LIB7136	Tsp-SL14	1124	722	0.642349	723	0.643238	86	136	179	1	0
LIB7136	Tsp-SL15	746	478	0.640751	479	0.642091	74	103	90	1	0
LIB7136	Tsp-SL1	6510	4383	0.673272	4385	0.673579	125	872	1128	2	0
LIB7136	Tsp-SL2	13687	8834	0.64543	8846	0.646307	253	2163	2425	12	0
LIB7136	Tsp-SL3	33262	23169	0.696561	23185	0.697042	314	4105	5658	16	0
LIB7136	Tsp-SL4	18488	12798	0.692233	12801	0.692395	308	2442	2937	3	0
LIB7136	Tsp-SL5	4111	2776	0.675261	2777	0.675505	220	421	693	1	0
LIB7136	Tsp-SL6	39119	27359	0.699379	27384	0.700018	420	4928	6386	26	1
LIB7136	Tsp-SL7	24711	17178	0.695156	17188	0.695561	346	3205	3971	11	1
LIB7136	Tsp-SL8	3427	2349	0.685439	2349	0.685439	84	396	598	0	0
LIB7136	Tsp-SL9	670	359	0.535821	359	0.535821	69	98	144	0	0
LIB7137	Tsp-SL10	7990	3896	0.48761	3904	0.488611	250	2719	1117	8	0
LIB7137	Tsp-SL11	22174	15267	0.688509	15271	0.688689	322	2934	3647	4	0
LIB7137	Tsp-SL12	11947	6631	0.555035	6639	0.555704	315	2759	2234	8	0
LIB7137	Tsp-SL13	2741	1685	0.614739	1685	0.614739	219	299	538	0	0
LIB7137	Tsp-SL14	1168	743	0.63613	744	0.636986	127	146	151	1	0
LIB7137	Tsp-SL15	828	525	0.634058	526	0.635266	105	92	105	1	0
LIB7137	Tsp-SL1	4899	3367	0.687283	3369	0.687691	105	598	827	2	0
LIB7137	Tsp-SL2	9417	6023	0.639588	6035	0.640862	216	1386	1780	12	0
LIB7137	Tsp-SL3	31266	21801	0.697275	21817	0.697787	300	3953	5196	16	0
LIB7137	Tsp-SL4	17446	12059	0.691219	12064	0.691505	259	2315	2808	5	0
LIB7137	Tsp-SL5	4391	2790	0.635391	2794	0.636302	327	562	708	4	0
LIB7137	Tsp-SL6	32523	22771	0.700151	22798	0.700981	402	4173	5150	27	0
LIB7137	Tsp-SL7	26352	18084	0.686248	18096	0.686703	372	3613	4268	15	3
LIB7137	Tsp-SL8	2884	1897	0.657767	1899	0.65846	87	380	518	2	0
LIB7137	Tsp-SL9	619	334	0.53958	334	0.53958	82	73	130	0	0
10bp overlap			Assigned	%	Assigned	%	Unassigned_Unmapped	Unassigned_MultiMapping	Unassigned_NoFeatures	Unassigned_Ambiguity	Unassigned_Ambiguity
LIB7135	Tsp-SL10	5921	3532	0.596521	3541	0.598041	110	1363	907	9	0
LIB7135	Tsp-SL11	21760	15215	0.699219	15220	0.699449	218	2813	3509	5	0
LIB7135	Tsp-SL12	12572	7225	0.57469	7239	0.575803	183	2919	2231	14	0
LIB7135	Tsp-SL13	703	375	0.533428	375	0.533428	28	107	193	0	0
LIB7135	Tsp-SL14	1082	761	0.703327	761	0.703327	61	121	139	0	0
LIB7135	Tsp-SL15	524	365	0.696565	365	0.696565	29	65	65	0	0
LIB7135	Tsp-SL1	5473	3692	0.674584	3693	0.674767	81	729	970	1	0
LIB7135	Tsp-SL2	6426	4068	0.633053	4072	0.633676	122	1117	1115	4	0
LIB7135	Tsp-SL3	21092	14546	0.689645	14554	0.690025	256	2715	3567	8	0
LIB7135	Tsp-SL4	16863	11925	0.70717	11927	0.707288	247	2029	2660	2	0
LIB7135	Tsp-SL5	2008	1394	0.694223	1394	0.694223	73	213	328	0	0
LIB7135	Tsp-SL6	14610	10224	0.699795	10227	0.7	187	1672	2524	3	0
LIB7135	Tsp-SL7	19713	13771	0.698575	13775	0.698777	232	2453	3253	4	0
LIB7135	Tsp-SL8	1483	994	0.670263	994	0.670263	24	207	258	0	0
LIB7135	Tsp-SL9	415	303	0.73012	305	0.73494	14	32	64	2	0
LIB7136	Tsp-SL10	5662	3331	0.588308	3339	0.589721	102	1273	948	8	0
LIB7136	Tsp-SL11	21975	15171	0.690375	15176	0.690603	203	2912	3684	5	0
LIB7136	Tsp-SL12	12148	6969	0.573675	6978	0.574416	177	2764	2229	9	0
LIB7136	Tsp-SL13	744	415	0.557796	415	0.557796	30	105	194	0	0
LIB7136	Tsp-SL14	1029	695	0.675413	696	0.676385	40	125	168	1	0
LIB7136	Tsp-SL15	545	359	0.658716	360	0.66055	28	74	83	1	0
LIB7136	Tsp-SL1	5299	3550	0.669938	3552	0.670315	93	734	920	2	0
LIB7136	Tsp-SL2	6963	4432	0.636507	4433	0.636651	134	1173	1223	1	0
LIB7136	Tsp-SL3	19969	13779	0.69002	13786	0.69037	232	2596	3355	7	0
LIB7136	Tsp-SL4	17593	12162	0.691298	12165	0.691468	276	2350	2802	3	0
LIB7136	Tsp-SL5	2581	1813	0.702441	1813	0.702441	61	271	436	0	0
LIB7136	Tsp-SL6	18448	12655	0.685982	12655	0.685982	217	2413	3163	0	0
LIB7136	Tsp-SL7	19928	13788	0.691891	13794	0.692192	267	2570	3296	7	1
LIB7136	Tsp-SL8	1135	765	0.674009	765	0.674009	17	148	205	0	0
LIB7136	Tsp-SL9	534	348	0.651685	348	0.651685	13	80	93	0	0
LIB7137	Tsp-SL10	5720	3285	0.574301	3292	0.575524	89	1339	1000	7	0
LIB7137	Tsp-SL11	19974	13786	0.690197	13789	0.690347	198	2672	3315	3	0
LIB7137	Tsp-SL12	10158	5726	0.563694	5731	0.564186	164	2344	1919	5	0
LIB7137	Tsp-SL13	770	394	0.511688	394	0.511688	52	107	217	0	0
LIB7137	Tsp-SL14	1081	714	0.6605	715	0.661425	83	142	141	1	0
LIB7137	Tsp-SL15	671	473	0.704918	474	0.706408	35	73	89	1	0
LIB7137	Tsp-SL1	4107	2833	0.689798	2835	0.690285	76	504	692	2	0
LIB7137	Tsp-SL2	4955	3078	0.621191	3082	0.621998	94	819	960	4	0
LIB7137	Tsp-SL3	18218	12482	0.685147	12486	0.685366	218	2417	3097	4	0
LIB7137	Tsp-SL4	16709	11552	0.691364	11557	0.691663	234	2230	2688	5	0
LIB7137	Tsp-SL5	2420	1603	0.662397	1604	0.66281	75	324	417	1	0
LIB7137	Tsp-SL6	12709	8611	0.677551	8614	0.677787	176	1696	2223	3	0
LIB7137	Tsp-SL7	21136	14560	0.688872	14566	0.689156	246	2840	3481	9	3
LIB7137	Tsp-SL8	864	567	0.65625	567	0.65625	17	117	163	0	0
LIB7137	Tsp-SL9	434	291	0.670507	291	0.670507	11	50	82	0	0
		Min		0.48761		0.488611
		Mean		0.650478		0.650978
		Max		0.73012		0.73494

## Sheet: Quantification (brakerTrinity)
			Exons		Genes					Exons	Genes
8bp overlap		Total alignments	Assigned	%	Assigned	%	Unassigned_Unmapped	Unassigned_MultiMapping	Unassigned_NoFeatures	Unassigned_Ambiguity	Unassigned_Ambiguity
LIB7135	Tsp-SL10	8217	4741	0.576975	4747	0.577705	214	2749	507	6	0
LIB7135	Tsp-SL11	24051	18511	0.769656	18523	0.770155	326	3080	2119	15	3
LIB7135	Tsp-SL12	14986	9940	0.663286	9949	0.663886	319	3455	1263	9	0
LIB7135	Tsp-SL13	2241	1564	0.697903	1566	0.698795	142	241	292	2	0
LIB7135	Tsp-SL14	1184	841	0.710304	841	0.710304	106	131	106	0	0
LIB7135	Tsp-SL15	627	415	0.661882	415	0.661882	81	67	64	0	0
LIB7135	Tsp-SL1	6551	4930	0.752557	4932	0.752862	98	852	668	3	1
LIB7135	Tsp-SL2	12646	9217	0.728847	9243	0.730903	252	2014	1136	27	1
LIB7135	Tsp-SL3	34455	26843	0.779074	26881	0.780177	330	4256	2985	41	3
LIB7135	Tsp-SL4	17664	13771	0.779608	13779	0.780061	271	2106	1505	11	3
LIB7135	Tsp-SL5	3502	2512	0.717304	2513	0.71759	261	373	352	4	3
LIB7135	Tsp-SL6	33723	26354	0.781484	26396	0.78273	429	4088	2807	45	3
LIB7135	Tsp-SL7	24715	19055	0.770989	19066	0.771434	350	3151	2147	12	1
LIB7135	Tsp-SL8	4559	3470	0.761132	3476	0.762448	115	583	385	6	0
LIB7135	Tsp-SL9	565	348	0.615929	348	0.615929	74	53	90	0	0
LIB7136	Tsp-SL10	7925	4600	0.580442	4605	0.581073	207	2638	475	5	0
LIB7136	Tsp-SL11	24423	18783	0.76907	18807	0.770053	304	3218	2093	25	1
LIB7136	Tsp-SL12	14092	9403	0.667258	9412	0.667897	272	3238	1170	9	0
LIB7136	Tsp-SL13	2259	1532	0.678176	1533	0.678619	172	252	302	1	0
LIB7136	Tsp-SL14	1124	775	0.689502	776	0.690391	86	136	126	1	0
LIB7136	Tsp-SL15	746	490	0.656836	490	0.656836	74	103	79	0	0
LIB7136	Tsp-SL1	6510	4915	0.754992	4921	0.755914	125	872	592	6	0
LIB7136	Tsp-SL2	13687	10018	0.731935	10044	0.733835	253	2163	1225	28	2
LIB7136	Tsp-SL3	33262	25803	0.77575	25852	0.777223	314	4105	2989	51	2
LIB7136	Tsp-SL4	18488	14212	0.768715	14227	0.769526	308	2442	1506	20	5
LIB7136	Tsp-SL5	4111	3083	0.749939	3084	0.750182	220	421	386	1	0
LIB7136	Tsp-SL6	39119	30345	0.77571	30402	0.777167	420	4928	3368	58	1
LIB7136	Tsp-SL7	24711	19064	0.771478	19086	0.772369	346	3205	2071	25	3
LIB7136	Tsp-SL8	3427	2606	0.760432	2617	0.763642	84	396	330	11	0
LIB7136	Tsp-SL9	670	403	0.601493	403	0.601493	69	98	98	2	2
LIB7137	Tsp-SL10	7990	4500	0.563204	4501	0.563329	250	2719	520	1	0
LIB7137	Tsp-SL11	22174	16941	0.764003	16958	0.76477	322	2934	1960	17	0
LIB7137	Tsp-SL12	11947	7754	0.649033	7760	0.649535	315	2759	1113	6	0
LIB7137	Tsp-SL13	2741	1867	0.681138	1869	0.681868	219	299	354	2	0
LIB7137	Tsp-SL14	1168	795	0.680651	797	0.682363	127	146	98	2	0
LIB7137	Tsp-SL15	828	540	0.652174	541	0.653382	105	92	90	1	0
LIB7137	Tsp-SL1	4899	3739	0.763217	3741	0.763625	105	598	454	3	1
LIB7137	Tsp-SL2	9417	6809	0.723054	6824	0.724647	216	1386	990	16	1
LIB7137	Tsp-SL3	31266	24255	0.775763	24288	0.776818	300	3953	2721	37	4
LIB7137	Tsp-SL4	17446	13420	0.769231	13433	0.769976	259	2315	1436	16	3
LIB7137	Tsp-SL5	4391	3102	0.706445	3105	0.707128	327	562	397	3	0
LIB7137	Tsp-SL6	32523	25171	0.773945	25224	0.775574	402	4173	2721	56	3
LIB7137	Tsp-SL7	26352	20162	0.765103	20188	0.76609	372	3613	2175	30	4
LIB7137	Tsp-SL8	2884	2133	0.739598	2144	0.743412	87	380	273	11	0
LIB7137	Tsp-SL9	619	363	0.58643	364	0.588045	82	73	100	1	0
10bp overlap			Assigned		Assigned		Unassigned_Unmapped	Unassigned_MultiMapping	Unassigned_NoFeatures	Unassigned_Ambiguity	Unassigned_Ambiguity
LIB7135	Tsp-SL10	5921	4017	0.678433	4020	0.678939	110	1363	428	3	0
LIB7135	Tsp-SL11	21760	16869	0.77523	16880	0.775735	218	2813	1846	14	3
LIB7135	Tsp-SL12	12572	8402	0.668311	8404	0.66847	183	2919	1066	2	0
LIB7135	Tsp-SL13	703	393	0.559033	393	0.559033	28	107	175	0	0
LIB7135	Tsp-SL14	1082	807	0.745841	807	0.745841	61	121	93	0	0
LIB7135	Tsp-SL15	524	386	0.736641	386	0.736641	29	65	44	0	0
LIB7135	Tsp-SL1	5473	4096	0.748401	4098	0.748767	81	729	564	3	1
LIB7135	Tsp-SL2	6426	4587	0.713819	4596	0.715219	122	1117	590	10	1
LIB7135	Tsp-SL3	21092	16162	0.766262	16178	0.767021	256	2715	1940	19	3
LIB7135	Tsp-SL4	16863	13150	0.779814	13156	0.78017	247	2029	1428	9	3
LIB7135	Tsp-SL5	2008	1532	0.762948	1532	0.762948	73	213	187	3	3
LIB7135	Tsp-SL6	14610	11352	0.777002	11368	0.778097	187	1672	1381	18	2
LIB7135	Tsp-SL7	19713	15274	0.774819	15279	0.775072	232	2453	1749	5	0
LIB7135	Tsp-SL8	1483	1104	0.744437	1105	0.745111	24	207	147	1	0
LIB7135	Tsp-SL9	415	320	0.771084	321	0.773494	14	32	48	1	0
LIB7136	Tsp-SL10	5662	3892	0.68739	3896	0.688096	102	1273	391	4	0
LIB7136	Tsp-SL11	21975	17002	0.773697	17022	0.774608	203	2912	1838	20	0
LIB7136	Tsp-SL12	12148	8210	0.675831	8217	0.676408	177	2764	990	7	0
LIB7136	Tsp-SL13	744	435	0.584677	435	0.584677	30	105	174	0	0
LIB7136	Tsp-SL14	1029	749	0.727891	750	0.728863	40	125	114	1	0
LIB7136	Tsp-SL15	545	389	0.713761	389	0.713761	28	74	54	0	0
LIB7136	Tsp-SL1	5299	3973	0.749764	3977	0.750519	93	734	495	4	0
LIB7136	Tsp-SL2	6963	4994	0.71722	4996	0.717507	134	1173	658	4	2
LIB7136	Tsp-SL3	19969	15325	0.76744	15348	0.768591	232	2596	1792	24	1
LIB7136	Tsp-SL4	17593	13512	0.768033	13527	0.768885	276	2350	1436	19	4
LIB7136	Tsp-SL5	2581	2025	0.78458	2025	0.78458	61	271	224	0	0
LIB7136	Tsp-SL6	18448	14076	0.76301	14090	0.763768	217	2413	1728	14	0
LIB7136	Tsp-SL7	19928	15372	0.771377	15388	0.77218	267	2570	1701	18	2
LIB7136	Tsp-SL8	1135	866	0.762996	867	0.763877	17	148	103	1	0
LIB7136	Tsp-SL9	534	389	0.728464	389	0.728464	13	80	50	2	2
LIB7137	Tsp-SL10	5720	3860	0.674825	3861	0.675	89	1339	431	1	0
LIB7137	Tsp-SL11	19974	15365	0.76925	15382	0.770101	198	2672	1722	17	0
LIB7137	Tsp-SL12	10158	6697	0.659283	6700	0.659579	164	2344	950	3	0
LIB7137	Tsp-SL13	770	414	0.537662	414	0.537662	52	107	197	0	0
LIB7137	Tsp-SL14	1081	768	0.710453	769	0.711378	83	142	87	1	0
LIB7137	Tsp-SL15	671	501	0.746647	502	0.748137	35	73	61	1	0
LIB7137	Tsp-SL1	4107	3137	0.763818	3139	0.764305	76	504	387	3	1
LIB7137	Tsp-SL2	4955	3473	0.700908	3476	0.701514	94	819	566	3	0
LIB7137	Tsp-SL3	18218	13883	0.762049	13896	0.762762	218	2417	1684	16	3
LIB7137	Tsp-SL4	16709	12842	0.768568	12855	0.769346	234	2230	1387	16	3
LIB7137	Tsp-SL5	2420	1794	0.741322	1795	0.741736	75	324	226	1	0
LIB7137	Tsp-SL6	12709	9602	0.755528	9611	0.756236	176	1696	1224	11	2
LIB7137	Tsp-SL7	21136	16235	0.768121	16251	0.768878	246	2840	1796	19	3
LIB7137	Tsp-SL8	864	642	0.743056	642	0.743056	17	117	88	0	0
LIB7137	Tsp-SL9	434	322	0.741935	323	0.74424	11	50	50	1	0
		Min		0.537662		0.537662
		Mean		0.721259		0.722032
		Max		0.78458		0.78458

## Sheet: Quantification (brakerBAM)
				Exons		Genes					Exons	Genes
8bp stringency	8bp overlap		Total alignments	Assigned	%	Assigned	%	Unassigned_Unmapped	Unassigned_MultiMapping	Unassigned_NoFeatures	Unassigned_Ambiguity	Unassigned_Ambiguity
LIB7135	LIB7135	Tsp-SL10	8217	4717	0.574054	4728	0.575392	214	2749	526	11	0
LIB7135	LIB7135	Tsp-SL11	24051	18358	0.763295	18380	0.764209	326	3080	2263	24	2
LIB7135	LIB7135	Tsp-SL12	14986	9952	0.664086	9962	0.664754	319	3455	1250	10	0
LIB7135	LIB7135	Tsp-SL13	2241	1489	0.664436	1491	0.665328	142	241	367	2	0
LIB7135	LIB7135	Tsp-SL14	1184	821	0.693412	822	0.694257	106	131	125	1	0
LIB7135	LIB7135	Tsp-SL15	627	414	0.660287	414	0.660287	81	67	65	0	0
LIB7135	LIB7135	Tsp-SL1	6551	4908	0.749199	4911	0.749657	98	852	689	4	1
LIB7135	LIB7135	Tsp-SL2	12646	9228	0.729717	9256	0.731931	252	2014	1124	28	0
LIB7135	LIB7135	Tsp-SL3	34455	26777	0.777159	26818	0.778349	330	4256	3049	43	2
LIB7135	LIB7135	Tsp-SL4	17664	13630	0.771626	13644	0.772418	271	2106	1641	16	2
LIB7135	LIB7135	Tsp-SL5	3502	2493	0.711879	2495	0.71245	261	373	373	2	0
LIB7135	LIB7135	Tsp-SL6	33723	26203	0.777007	26247	0.778312	429	4088	2957	46	2
LIB7135	LIB7135	Tsp-SL7	24715	18926	0.76577	18945	0.766539	350	3151	2269	19	0
LIB7135	LIB7135	Tsp-SL8	4559	3478	0.762887	3484	0.764203	115	583	377	6	0
LIB7135	LIB7135	Tsp-SL9	565	349	0.617699	350	0.619469	74	53	88	1	0
LIB7136	LIB7136	Tsp-SL10	7925	4568	0.576404	4573	0.577035	207	2638	507	5	0
LIB7136	LIB7136	Tsp-SL11	24423	18654	0.763788	18694	0.765426	304	3218	2206	41	1
LIB7136	LIB7136	Tsp-SL12	14092	9404	0.667329	9416	0.668181	272	3238	1166	12	0
LIB7136	LIB7136	Tsp-SL13	2259	1477	0.653829	1479	0.654714	172	252	356	2	0
LIB7136	LIB7136	Tsp-SL14	1124	768	0.683274	769	0.684164	86	136	133	1	0
LIB7136	LIB7136	Tsp-SL15	746	479	0.642091	479	0.642091	74	103	90	0	0
LIB7136	LIB7136	Tsp-SL1	6510	4874	0.748694	4885	0.750384	125	872	628	11	0
LIB7136	LIB7136	Tsp-SL2	13687	10012	0.731497	10036	0.733251	253	2163	1233	26	2
LIB7136	LIB7136	Tsp-SL3	33262	25753	0.774247	25802	0.77572	314	4105	3039	51	2
LIB7136	LIB7136	Tsp-SL4	18488	14142	0.764929	14159	0.765848	308	2442	1578	18	1
LIB7136	LIB7136	Tsp-SL5	4111	3041	0.739723	3044	0.740452	220	421	426	3	0
LIB7136	LIB7136	Tsp-SL6	39119	30195	0.771876	30269	0.773767	420	4928	3502	74	0
LIB7136	LIB7136	Tsp-SL7	24711	18964	0.767432	18991	0.768524	346	3205	2167	29	2
LIB7136	LIB7136	Tsp-SL8	3427	2592	0.756347	2601	0.758973	84	396	346	9	0
LIB7136	LIB7136	Tsp-SL9	670	408	0.608955	408	0.608955	69	98	95	0	0
LIB7137	LIB7137	Tsp-SL10	7990	4483	0.561076	4484	0.561202	250	2719	537	1	0
LIB7137	LIB7137	Tsp-SL11	22174	16746	0.755209	16773	0.756426	322	2934	2145	27	0
LIB7137	LIB7137	Tsp-SL12	11947	7755	0.649117	7763	0.649787	315	2759	1110	8	0
LIB7137	LIB7137	Tsp-SL13	2741	1823	0.665086	1825	0.665815	219	299	398	2	0
LIB7137	LIB7137	Tsp-SL14	1168	773	0.661815	775	0.663527	127	146	120	2	0
LIB7137	LIB7137	Tsp-SL15	828	528	0.637681	529	0.638889	105	92	102	1	0
LIB7137	LIB7137	Tsp-SL1	4899	3706	0.756481	3708	0.756889	105	598	488	2	0
LIB7137	LIB7137	Tsp-SL2	9417	6810	0.72316	6829	0.725178	216	1386	985	20	1
LIB7137	LIB7137	Tsp-SL3	31266	24106	0.770997	24143	0.772181	300	3953	2869	38	1
LIB7137	LIB7137	Tsp-SL4	17446	13310	0.762926	13328	0.763957	259	2315	1544	18	0
LIB7137	LIB7137	Tsp-SL5	4391	3051	0.69483	3054	0.695514	327	562	448	3	0
LIB7137	LIB7137	Tsp-SL6	32523	24964	0.76758	25021	0.769332	402	4173	2926	58	1
LIB7137	LIB7137	Tsp-SL7	26352	19944	0.756831	19968	0.757741	372	3613	2396	27	3
LIB7137	LIB7137	Tsp-SL8	2884	2136	0.740638	2147	0.744452	87	380	270	11	0
LIB7137	LIB7137	Tsp-SL9	619	373	0.602585	374	0.6042	82	73	90	1	0
10bp stringency	10bp overlap			Assigned		Assigned		Unassigned_Unmapped	Unassigned_MultiMapping	Unassigned_NoFeatures	Unassigned_Ambiguity	Unassigned_Ambiguity
LIB7135	LIB7135	Tsp-SL10	5921	3994	0.674548	4002	0.675899	110	1363	446	8	0
LIB7135	LIB7135	Tsp-SL11	21760	16722	0.768474	16742	0.769393	218	2813	1985	22	2
LIB7135	LIB7135	Tsp-SL12	12572	8409	0.668867	8411	0.669026	183	2919	1059	2	0
LIB7135	LIB7135	Tsp-SL13	703	379	0.539118	379	0.539118	28	107	189	0	0
LIB7135	LIB7135	Tsp-SL14	1082	787	0.727357	788	0.728281	61	121	112	1	0
LIB7135	LIB7135	Tsp-SL15	524	383	0.730916	383	0.730916	29	65	47	0	0
LIB7135	LIB7135	Tsp-SL1	5473	4071	0.743833	4074	0.744382	81	729	588	4	1
LIB7135	LIB7135	Tsp-SL2	6426	4597	0.715375	4606	0.716776	122	1117	581	9	0
LIB7135	LIB7135	Tsp-SL3	21092	16071	0.761948	16088	0.762754	256	2715	2031	19	2
LIB7135	LIB7135	Tsp-SL4	16863	13003	0.771096	13016	0.771867	247	2029	1569	15	2
LIB7135	LIB7135	Tsp-SL5	2008	1527	0.760458	1528	0.760956	73	213	194	1	0
LIB7135	LIB7135	Tsp-SL6	14610	11318	0.774675	11334	0.77577	187	1672	1416	17	1
LIB7135	LIB7135	Tsp-SL7	19713	15146	0.768325	15158	0.768934	232	2453	1870	12	0
LIB7135	LIB7135	Tsp-SL8	1483	1110	0.748483	1111	0.749157	24	207	141	1	0
LIB7135	LIB7135	Tsp-SL9	415	324	0.780723	324	0.780723	14	32	45	0	0
LIB7136	LIB7136	Tsp-SL10	5662	3854	0.680678	3858	0.681385	102	1273	429	4	0
LIB7136	LIB7136	Tsp-SL11	21975	16864	0.767418	16897	0.768919	203	2912	1963	33	0
LIB7136	LIB7136	Tsp-SL12	12148	8209	0.675749	8217	0.676408	177	2764	990	8	0
LIB7136	LIB7136	Tsp-SL13	744	429	0.576613	429	0.576613	30	105	180	0	0
LIB7136	LIB7136	Tsp-SL14	1029	742	0.721088	743	0.72206	40	125	121	1	0
LIB7136	LIB7136	Tsp-SL15	545	378	0.693578	378	0.693578	28	74	65	0	0
LIB7136	LIB7136	Tsp-SL1	5299	3928	0.741272	3934	0.742404	93	734	538	6	0
LIB7136	LIB7136	Tsp-SL2	6963	4988	0.716358	4990	0.716645	134	1173	664	4	2
LIB7136	LIB7136	Tsp-SL3	19969	15173	0.759828	15200	0.76118	232	2596	1941	27	0
LIB7136	LIB7136	Tsp-SL4	17593	13448	0.764395	13465	0.765361	276	2350	1502	17	0
LIB7136	LIB7136	Tsp-SL5	2581	1982	0.767919	1983	0.768307	61	271	266	1	0
LIB7136	LIB7136	Tsp-SL6	18448	13990	0.758348	14015	0.759703	217	2413	1803	25	0
LIB7136	LIB7136	Tsp-SL7	19928	15292	0.767363	15311	0.768316	267	2570	1779	20	1
LIB7136	LIB7136	Tsp-SL8	1135	844	0.743612	845	0.744493	17	148	125	1	0
LIB7136	LIB7136	Tsp-SL9	534	394	0.737828	394	0.737828	13	80	47	0	0
LIB7137	LIB7137	Tsp-SL10	5720	3843	0.671853	3844	0.672028	89	1339	448	1	0
LIB7137	LIB7137	Tsp-SL11	19974	15181	0.760038	15208	0.76139	198	2672	1896	27	0
LIB7137	LIB7137	Tsp-SL12	10158	6700	0.659579	6703	0.659874	164	2344	947	3	0
LIB7137	LIB7137	Tsp-SL13	770	414	0.537662	414	0.537662	52	107	197	0	0
LIB7137	LIB7137	Tsp-SL14	1081	747	0.691027	748	0.691952	83	142	108	1	0
LIB7137	LIB7137	Tsp-SL15	671	489	0.728763	490	0.730253	35	73	73	1	0
LIB7137	LIB7137	Tsp-SL1	4107	3099	0.754565	3101	0.755052	76	504	426	2	0
LIB7137	LIB7137	Tsp-SL2	4955	3473	0.700908	3477	0.701715	94	819	565	4	0
LIB7137	LIB7137	Tsp-SL3	18218	13698	0.751894	13710	0.752552	218	2417	1872	13	1
LIB7137	LIB7137	Tsp-SL4	16709	12732	0.761985	12750	0.763062	234	2230	1495	18	0
LIB7137	LIB7137	Tsp-SL5	2420	1761	0.727686	1762	0.728099	75	324	259	1	0
LIB7137	LIB7137	Tsp-SL6	12709	9522	0.749233	9531	0.749941	176	1696	1306	9	0
LIB7137	LIB7137	Tsp-SL7	21136	16056	0.759652	16072	0.760409	246	2840	1975	19	3
LIB7137	LIB7137	Tsp-SL8	864	639	0.739583	639	0.739583	17	117	91	0	0
LIB7137	LIB7137	Tsp-SL9	434	333	0.767281	334	0.769585	11	50	39	1	0
			Min		0.537662		0.537662
			Mean		0.715632		0.71656
			Max		0.780723		0.780723

## Sheet: Quantification (stringtie)
			Exons		Genes					Exons	Genes
8bp overlap		Total alignments	Assigned	%	Assigned	%	Unassigned_Unmapped	Unassigned_MultiMapping	Unassigned_NoFeatures	Unassigned_Ambiguity	Unassigned_Ambiguity
LIB7135	Tsp-SL10	8217	4902	0.596568	4916	0.598272	214	2749	338	14	0
LIB7135	Tsp-SL11	24051	19581	0.814145	19589	0.814478	326	3080	1056	8	0
LIB7135	Tsp-SL12	14986	10357	0.691112	10373	0.692179	319	3455	839	16	0
LIB7135	Tsp-SL13	2241	1722	0.768407	1724	0.769299	142	241	134	2	0
LIB7135	Tsp-SL14	1184	898	0.758446	898	0.758446	106	131	49	0	0
LIB7135	Tsp-SL15	627	452	0.720893	452	0.720893	81	67	27	0	0
LIB7135	Tsp-SL1	6551	5318	0.811784	5335	0.814379	98	852	266	17	0
LIB7135	Tsp-SL2	12646	9830	0.777321	9835	0.777716	252	2014	545	5	0
LIB7135	Tsp-SL3	34455	28367	0.823306	28407	0.824467	330	4256	1462	40	0
LIB7135	Tsp-SL4	17664	14581	0.825464	14614	0.827332	271	2106	673	33	0
LIB7135	Tsp-SL5	3502	2684	0.766419	2689	0.767847	261	373	179	5	0
LIB7135	Tsp-SL6	33723	27782	0.823829	27808	0.8246	429	4088	1398	26	0
LIB7135	Tsp-SL7	24715	20246	0.819179	20254	0.819502	350	3151	960	8	0
LIB7135	Tsp-SL8	4559	3676	0.806317	3680	0.807195	115	583	181	4	0
LIB7135	Tsp-SL9	565	401	0.709735	401	0.709735	74	53	37	0	0
LIB7136	Tsp-SL10	7925	4741	0.598233	4751	0.599495	207	2638	329	10	0
LIB7136	Tsp-SL11	24423	19837	0.812226	19858	0.813086	304	3218	1043	21	0
LIB7136	Tsp-SL12	14092	9826	0.697275	9844	0.698552	272	3238	738	18	0
LIB7136	Tsp-SL13	2259	1677	0.742364	1677	0.742364	172	252	158	0	0
LIB7136	Tsp-SL14	1124	848	0.754448	848	0.754448	86	136	54	0	0
LIB7136	Tsp-SL15	746	535	0.717158	535	0.717158	74	103	34	0	0
LIB7136	Tsp-SL1	6510	5225	0.802611	5236	0.804301	125	872	277	11	0
LIB7136	Tsp-SL2	13687	10650	0.778111	10660	0.778841	253	2163	611	10	0
LIB7136	Tsp-SL3	33262	27493	0.826559	27536	0.827852	314	4105	1307	43	0
LIB7136	Tsp-SL4	18488	14930	0.807551	14971	0.809768	308	2442	767	41	0
LIB7136	Tsp-SL5	4111	3267	0.794697	3277	0.79713	220	421	193	10	0
LIB7136	Tsp-SL6	39119	32126	0.821238	32150	0.821851	420	4928	1621	24	0
LIB7136	Tsp-SL7	24711	20166	0.816074	20177	0.816519	346	3205	983	11	0
LIB7136	Tsp-SL8	3427	2785	0.812664	2786	0.812956	84	396	161	1	0
LIB7136	Tsp-SL9	670	463	0.691045	463	0.691045	69	98	40	0	0
LIB7137	Tsp-SL10	7990	4660	0.583229	4667	0.584105	250	2719	354	7	0
LIB7137	Tsp-SL11	22174	17903	0.807387	17914	0.807883	322	2934	1004	11	0
LIB7137	Tsp-SL12	11947	8157	0.682766	8175	0.684272	315	2759	698	18	0
LIB7137	Tsp-SL13	2741	2060	0.751551	2061	0.751915	219	299	162	1	0
LIB7137	Tsp-SL14	1168	840	0.719178	841	0.720034	127	146	54	1	0
LIB7137	Tsp-SL15	828	587	0.708937	587	0.708937	105	92	44	0	0
LIB7137	Tsp-SL1	4899	3989	0.814248	3999	0.816289	105	598	197	10	0
LIB7137	Tsp-SL2	9417	7356	0.78114	7366	0.782202	216	1386	449	10	0
LIB7137	Tsp-SL3	31266	25726	0.822811	25765	0.824058	300	3953	1248	39	0
LIB7137	Tsp-SL4	17446	14111	0.808839	14144	0.81073	259	2315	728	33	0
LIB7137	Tsp-SL5	4391	3308	0.753359	3311	0.754042	327	562	191	3	0
LIB7137	Tsp-SL6	32523	26634	0.818928	26643	0.819205	402	4173	1305	9	0
LIB7137	Tsp-SL7	26352	21301	0.808326	21312	0.808743	372	3613	1055	11	0
LIB7137	Tsp-SL8	2884	2287	0.792996	2287	0.792996	87	380	130	0	0
LIB7137	Tsp-SL9	619	428	0.691438	428	0.691438	82	73	36	0	0
10bp overlap			Assigned		Assigned		Unassigned_Unmapped	Unassigned_MultiMapping	Unassigned_NoFeatures	Unassigned_Ambiguity	Unassigned_Ambiguity
LIB7135	Tsp-SL10	5921	4160	0.702584	4173	0.70478	110	1363	275	13	0
LIB7135	Tsp-SL11	21760	17807	0.818336	17814	0.818658	218	2813	915	7	0
LIB7135	Tsp-SL12	12572	8783	0.698616	8791	0.699252	183	2919	679	8	0
LIB7135	Tsp-SL13	703	501	0.71266	502	0.714083	28	107	66	1	0
LIB7135	Tsp-SL14	1082	858	0.792976	858	0.792976	61	121	42	0	0
LIB7135	Tsp-SL15	524	412	0.78626	412	0.78626	29	65	18	0	0
LIB7135	Tsp-SL1	5473	4421	0.807784	4438	0.81089	81	729	225	17	0
LIB7135	Tsp-SL2	6426	4911	0.764239	4914	0.764706	122	1117	273	3	0
LIB7135	Tsp-SL3	21092	17137	0.812488	17177	0.814385	256	2715	944	40	0
LIB7135	Tsp-SL4	16863	13901	0.824349	13933	0.826247	247	2029	654	32	0
LIB7135	Tsp-SL5	2008	1624	0.808765	1629	0.811255	73	213	93	5	0
LIB7135	Tsp-SL6	14610	12151	0.831691	12176	0.833402	187	1672	575	25	0
LIB7135	Tsp-SL7	19713	16275	0.825597	16283	0.826003	232	2453	745	8	0
LIB7135	Tsp-SL8	1483	1188	0.801079	1192	0.803776	24	207	60	4	0
LIB7135	Tsp-SL9	415	351	0.845783	352	0.848193	14	32	17	1	0
LIB7136	Tsp-SL10	5662	4000	0.706464	4010	0.70823	102	1273	277	10	0
LIB7136	Tsp-SL11	21975	17931	0.815973	17952	0.816928	203	2912	908	21	0
LIB7136	Tsp-SL12	12148	8557	0.704396	8570	0.705466	177	2764	637	13	0
LIB7136	Tsp-SL13	744	524	0.704301	524	0.704301	30	105	85	0	0
LIB7136	Tsp-SL14	1029	815	0.792031	815	0.792031	40	125	49	0	0
LIB7136	Tsp-SL15	545	417	0.765138	417	0.765138	28	74	26	0	0
LIB7136	Tsp-SL1	5299	4234	0.799019	4245	0.801095	93	734	227	11	0
LIB7136	Tsp-SL2	6963	5315	0.76332	5320	0.764038	134	1173	336	5	0
LIB7136	Tsp-SL3	19969	16296	0.816065	16336	0.818068	232	2596	805	40	0
LIB7136	Tsp-SL4	17593	14203	0.80731	14244	0.80964	276	2350	723	41	0
LIB7136	Tsp-SL5	2581	2128	0.824487	2138	0.828361	61	271	111	10	0
LIB7136	Tsp-SL6	18448	15087	0.817812	15110	0.819059	217	2413	708	23	0
LIB7136	Tsp-SL7	19928	16305	0.818196	16316	0.818747	267	2570	775	11	0
LIB7136	Tsp-SL8	1135	907	0.799119	907	0.799119	17	148	63	0	0
LIB7136	Tsp-SL9	534	412	0.771536	412	0.771536	13	80	29	0	0
LIB7137	Tsp-SL10	5720	3984	0.696503	3991	0.697727	89	1339	301	7	0
LIB7137	Tsp-SL11	19974	16227	0.812406	16238	0.812957	198	2672	866	11	0
LIB7137	Tsp-SL12	10158	7055	0.694526	7061	0.695117	164	2344	589	6	0
LIB7137	Tsp-SL13	770	518	0.672727	519	0.674026	52	107	92	1	0
LIB7137	Tsp-SL14	1081	814	0.753006	814	0.753006	83	142	42	0	0
LIB7137	Tsp-SL15	671	534	0.795827	534	0.795827	35	73	29	0	0
LIB7137	Tsp-SL1	4107	3349	0.815437	3359	0.817872	76	504	168	10	0
LIB7137	Tsp-SL2	4955	3797	0.766297	3802	0.767306	94	819	240	5	0
LIB7137	Tsp-SL3	18218	14775	0.811011	14813	0.813097	218	2417	770	38	0
LIB7137	Tsp-SL4	16709	13511	0.808606	13544	0.810581	234	2230	701	33	0
LIB7137	Tsp-SL5	2420	1922	0.794215	1925	0.795455	75	324	96	3	0
LIB7137	Tsp-SL6	12709	10363	0.815406	10371	0.816036	176	1696	466	8	0
LIB7137	Tsp-SL7	21136	17187	0.813162	17198	0.813683	246	2840	852	11	0
LIB7137	Tsp-SL8	864	699	0.809028	699	0.809028	17	117	31	0	0
LIB7137	Tsp-SL9	434	354	0.815668	354	0.815668	11	50	19	0	0
		Min		0.583229		0.584105
		Mean		0.772695		0.773695
		Max		0.845783		0.848193

## Sheet: Quantification (denovo_all)
			Exons		Genes					Exons	Genes
8bp overlap		Total alignments	Assigned	%	Assigned	%	Unassigned_Unmapped	Unassigned_MultiMapping	Unassigned_NoFeatures	Unassigned_Ambiguity	Unassigned_Ambiguity
LIB7135	Tsp-SL10	8217	5145	0.626141	5159	0.627845	214	2749	95	14	0
LIB7135	Tsp-SL11	24051	20343	0.845828	20352	0.846202	326	3080	293	9	0
LIB7135	Tsp-SL12	14986	11000	0.734018	11017	0.735153	319	3455	195	17	0
LIB7135	Tsp-SL13	2241	1781	0.794734	1784	0.796073	142	241	74	3	0
LIB7135	Tsp-SL14	1184	929	0.784628	929	0.784628	106	131	18	0	0
LIB7135	Tsp-SL15	627	461	0.735247	461	0.735247	81	67	18	0	0
LIB7135	Tsp-SL1	6551	5510	0.841093	5527	0.843688	98	852	74	17	0
LIB7135	Tsp-SL2	12646	10228	0.808793	10234	0.809268	252	2014	146	6	0
LIB7135	Tsp-SL3	34455	29501	0.856218	29542	0.857408	330	4256	327	41	0
LIB7135	Tsp-SL4	17664	15070	0.853148	15103	0.855016	271	2106	184	33	0
LIB7135	Tsp-SL5	3502	2788	0.796117	2793	0.797544	261	373	75	5	0
LIB7135	Tsp-SL6	33723	28880	0.856389	28912	0.857338	429	4088	294	32	0
LIB7135	Tsp-SL7	24715	20970	0.848473	20978	0.848796	350	3151	236	8	0
LIB7135	Tsp-SL8	4559	3799	0.833297	3804	0.834394	115	583	57	5	0
LIB7135	Tsp-SL9	565	420	0.743363	420	0.743363	74	53	18	0	0
LIB7136	Tsp-SL10	7925	4984	0.628896	4996	0.63041	207	2638	84	12	0
LIB7136	Tsp-SL11	24423	20626	0.844532	20649	0.845474	304	3218	252	23	0
LIB7136	Tsp-SL12	14092	10379	0.736517	10399	0.737936	272	3238	183	20	0
LIB7136	Tsp-SL13	2259	1746	0.772908	1746	0.772908	172	252	89	0	0
LIB7136	Tsp-SL14	1124	879	0.782028	879	0.782028	86	136	23	0	0
LIB7136	Tsp-SL15	746	550	0.737265	550	0.737265	74	103	19	0	0
LIB7136	Tsp-SL1	6510	5417	0.832104	5429	0.833948	125	872	84	12	0
LIB7136	Tsp-SL2	13687	11098	0.810842	11109	0.811646	253	2163	162	11	0
LIB7136	Tsp-SL3	33262	28438	0.85497	28486	0.856413	314	4105	357	48	0
LIB7136	Tsp-SL4	18488	15500	0.838382	15541	0.840599	308	2442	197	41	0
LIB7136	Tsp-SL5	4111	3392	0.825103	3402	0.827536	220	421	68	10	0
LIB7136	Tsp-SL6	39119	33335	0.852143	33369	0.853013	420	4928	402	34	0
LIB7136	Tsp-SL7	24711	20936	0.847234	20949	0.84776	346	3205	211	13	0
LIB7136	Tsp-SL8	3427	2896	0.845054	2898	0.845638	84	396	49	2	0
LIB7136	Tsp-SL9	670	484	0.722388	484	0.722388	69	98	19	0	0
LIB7137	Tsp-SL10	7990	4920	0.61577	4927	0.616646	250	2719	94	7	0
LIB7137	Tsp-SL11	22174	18652	0.841165	18663	0.841661	322	2934	255	11	0
LIB7137	Tsp-SL12	11947	8677	0.726291	8696	0.727881	315	2759	177	19	0
LIB7137	Tsp-SL13	2741	2118	0.772711	2120	0.77344	219	299	103	2	0
LIB7137	Tsp-SL14	1168	876	0.75	877	0.750856	127	146	18	1	0
LIB7137	Tsp-SL15	828	606	0.731884	606	0.731884	105	92	25	0	0
LIB7137	Tsp-SL1	4899	4137	0.844458	4147	0.846499	105	598	49	10	0
LIB7137	Tsp-SL2	9417	7661	0.813529	7671	0.814591	216	1386	144	10	0
LIB7137	Tsp-SL3	31266	26633	0.85182	26677	0.853227	300	3953	336	44	0
LIB7137	Tsp-SL4	17446	14658	0.840193	14691	0.842084	259	2315	181	33	0
LIB7137	Tsp-SL5	4391	3429	0.780916	3432	0.781599	327	562	70	3	0
LIB7137	Tsp-SL6	32523	27654	0.850291	27671	0.850813	402	4173	277	17	0
LIB7137	Tsp-SL7	26352	22141	0.840202	22158	0.840847	372	3613	209	17	0
LIB7137	Tsp-SL8	2884	2363	0.819348	2367	0.820735	87	380	50	4	0
LIB7137	Tsp-SL9	619	443	0.71567	443	0.71567	82	73	21	0	0
10bp overlap			Assigned	%	Assigned	%	Unassigned_Unmapped	Unassigned_MultiMapping	Unassigned_NoFeatures	Unassigned_Ambiguity	Unassigned_Ambiguity
LIB7135	Tsp-SL10	5921	4364	0.737038	4377	0.739233	110	1363	71	13	0
LIB7135	Tsp-SL11	21760	18499	0.850138	18507	0.850506	218	2813	222	8	0
LIB7135	Tsp-SL12	12572	9301	0.739819	9310	0.740535	183	2919	160	9	0
LIB7135	Tsp-SL13	703	512	0.728307	513	0.72973	28	107	55	1	0
LIB7135	Tsp-SL14	1082	889	0.821627	889	0.821627	61	121	11	0	0
LIB7135	Tsp-SL15	524	421	0.803435	421	0.803435	29	65	9	0	0
LIB7135	Tsp-SL1	5473	4585	0.837749	4602	0.840855	81	729	61	17	0
LIB7135	Tsp-SL2	6426	5111	0.795363	5115	0.795985	122	1117	72	4	0
LIB7135	Tsp-SL3	21092	17867	0.847098	17907	0.848995	256	2715	214	40	0
LIB7135	Tsp-SL4	16863	14378	0.852636	14410	0.854534	247	2029	177	32	0
LIB7135	Tsp-SL5	2008	1690	0.841633	1695	0.844124	73	213	27	5	0
LIB7135	Tsp-SL6	14610	12574	0.860643	12599	0.862355	187	1672	152	25	0
LIB7135	Tsp-SL7	19713	16845	0.854512	16853	0.854918	232	2453	175	8	0
LIB7135	Tsp-SL8	1483	1230	0.8294	1235	0.832771	24	207	17	5	0
LIB7135	Tsp-SL9	415	364	0.877108	365	0.879518	14	32	4	1	0
LIB7136	Tsp-SL10	5662	4205	0.74267	4217	0.74479	102	1273	70	12	0
LIB7136	Tsp-SL11	21975	18641	0.848282	18664	0.849329	203	2912	196	23	0
LIB7136	Tsp-SL12	12148	9044	0.744485	9059	0.745719	177	2764	148	15	0
LIB7136	Tsp-SL13	744	549	0.737903	549	0.737903	30	105	60	0	0
LIB7136	Tsp-SL14	1029	847	0.823129	847	0.823129	40	125	17	0	0
LIB7136	Tsp-SL15	545	432	0.792661	432	0.792661	28	74	11	0	0
LIB7136	Tsp-SL1	5299	4393	0.829024	4404	0.8311	93	734	68	11	0
LIB7136	Tsp-SL2	6963	5551	0.797214	5556	0.797932	134	1173	100	5	0
LIB7136	Tsp-SL3	19969	16887	0.845661	16928	0.847714	232	2596	213	41	0
LIB7136	Tsp-SL4	17593	14740	0.837833	14781	0.840164	276	2350	186	41	0
LIB7136	Tsp-SL5	2581	2206	0.854707	2216	0.858582	61	271	33	10	0
LIB7136	Tsp-SL6	18448	15592	0.845186	15615	0.846433	217	2413	203	23	0
LIB7136	Tsp-SL7	19928	16917	0.848906	16929	0.849508	267	2570	162	12	0
LIB7136	Tsp-SL8	1135	958	0.844053	958	0.844053	17	148	12	0	0
LIB7136	Tsp-SL9	534	434	0.812734	434	0.812734	13	80	7	0	0
LIB7137	Tsp-SL10	5720	4209	0.735839	4216	0.737063	89	1339	76	7	0
LIB7137	Tsp-SL11	19974	16903	0.84625	16914	0.846801	198	2672	190	11	0
LIB7137	Tsp-SL12	10158	7500	0.738334	7507	0.739023	164	2344	143	7	0
LIB7137	Tsp-SL13	770	532	0.690909	533	0.692208	52	107	78	1	0
LIB7137	Tsp-SL14	1081	844	0.780759	844	0.780759	83	142	12	0	0
LIB7137	Tsp-SL15	671	552	0.822653	552	0.822653	35	73	11	0	0
LIB7137	Tsp-SL1	4107	3476	0.84636	3486	0.848795	76	504	41	10	0
LIB7137	Tsp-SL2	4955	3958	0.798789	3963	0.799798	94	819	79	5	0
LIB7137	Tsp-SL3	18218	15326	0.841256	15364	0.843342	218	2417	219	38	0
LIB7137	Tsp-SL4	16709	14038	0.840146	14071	0.842121	234	2230	174	33	0
LIB7137	Tsp-SL5	2420	1997	0.825207	2000	0.826446	75	324	21	3	0
LIB7137	Tsp-SL6	12709	10713	0.842946	10721	0.843575	176	1696	116	8	0
LIB7137	Tsp-SL7	21136	17858	0.844909	17873	0.845619	246	2840	177	15	0
LIB7137	Tsp-SL8	864	716	0.828704	716	0.828704	17	117	14	0	0
LIB7137	Tsp-SL9	434	365	0.841014	365	0.841014	11	50	8	0	0
		Min		0.61577		0.616646
		Mean		0.80319		0.804268
		Max		0.877108		0.879518
