# Supplementary material
Source: HighWire-hosted journal article supplement (doi:10.1101/rna.076414.120)
Supplement: Supplemental_Table_S2.xlsx [file Supplemental_Table_S2.xlsx]

## Sheet: Legend
Supplementary Table S2. Detailed summaries of genome annotations (reference annotation and four de novo annotations), gene classification by Tsp-SL trans-splicing events and operon prediction across all 20 datasets. Numbers of reads and genes in particular classes are presented alongside numbers and sizes of predicted operons and results of Wilcoxon rank-sum tests among datasets grouped by annota…

## Sheet: Overview
Gene annotation summary
Genome annotation	SL screening match	Genes	Corrected genes	Genes gained	BUSCO completeness summary
REFERENCE	10 bp	16380	16630	250	C:67.0%[S:64.9%,D:2.1%],F:3.5%,M:29.5%,n:3131
REFERENCE	8 bp	16380	16720	340
BRAKER	10 bp	16312	16657	345	C:68.0%[S:57.0%,D:11.0%],F:1.4%,M:30.6%,n:3131
BRAKER	8 bp	16312	16767	455
BRAKER+TRINITY	10 bp	20083	20381	298	C:68.2%[S:58.2%,D:10.0%],F:1.7%,M:30.1%,n:3131
BRAKER+TRINITY	8 bp	20083	20487	404
STRINGTIE	10 bp	13060	13765	705	C:67.8%[S:32.1%,D:35.7%],F:0.9%,M:31.3%,n:3131
STRINGTIE	8 bp	13060	13954	894
DENOVO_ALL	10 bp	19573	20448	875	C:71.5%[S:25.8%,D:45.7%],F:0.8%,M:27.7%,n:3131
DENOVO_ALL	8 bp	19573	20676	1103
SL reads summary
																Operon sizes
Genome annotation	SL screening match	Annotation correction	SL1 reads	SL2 reads	Genes	Expressed		Trans-spliced genes	SL1 genes	SL2 genes	SL1+SL2 genes	SL2:SL1>2	Not transpliced	Operonic genes	Operons	1	2	3	4	5
BRAKER	10 bp	corrected	238144	47900	16657	14903	3694	0.24787	1869	464	1361	22	12963	923	443	6	400	32	4	1
BRAKER	10 bp	uncorrected	239278	48108	16312	14561	3386	0.232539	1628	361	1397	52	12926	789	382	6	351	21	2	2
BRAKER	8 bp	corrected	349571	66675	16767	15013	4161	0.27716	1890	491	1780	38	12606	1004	482	7	435	34	5	1
BRAKER	8 bp	uncorrected	351226	67047	16312	14561	3752	0.257675	1593	377	1782	68	12560	851	413	7	380	22	2	2
BRAKER+TRINITY	10 bp	corrected	240225	47957	20381	17925	3670	0.204742	1853	464	1353	21	16711	922	442	5	400	32	4	1
BRAKER+TRINITY	10 bp	uncorrected	241289	48166	20083	17633	3409	0.193331	1644	377	1388	45	16674	805	388	5	354	25	3	1
BRAKER+TRINITY	8 bp	corrected	352023	66726	20487	18031	4149	0.230104	1896	488	1765	33	16338	992	477	6	434	31	5	1
BRAKER+TRINITY	8 bp	uncorrected	353586	67085	20083	17633	3786	0.214711	1623	394	1769	60	16297	866	418	6	381	27	3	1
DENOVO_ALL	10 bp	corrected	264320	52973	20448	18119	4027	0.222253	1950	465	1612	41	16421	963	469	12	423	31	3	0
DENOVO_ALL	10 bp	uncorrected	266192	53320	19573	17244	3221	0.18679	1393	242	1586	81	16352	618	307	12	280	14	1	0
DENOVO_ALL	8 bp	corrected	386471	73704	20676	18347	4587	0.250014	2016	490	2081	61	16089	1045	509	15	455	36	3	0
DENOVO_ALL	8 bp	uncorrected	388839	74208	19573	17244	3555	0.206159	1375	249	1931	91	16018	648	323	15	292	15	1	0
REFERENCE	10 bp	corrected	216267	41529	16630	15273	3217	0.210633	1660	383	1174	14	13413	763	371	5	342	22	2	0
REFERENCE	10 bp	uncorrected	217007	41707	16380	15024	2992	0.199148	1498	291	1203	52	13388	663	325	5	302	18	0	0
REFERENCE	8 bp	corrected	317337	58129	16720	15364	3708	0.241343	1761	401	1546	28	13012	824	402	7	370	23	2	0
REFERENCE	8 bp	uncorrected	318358	58387	16380	15025	3396	0.226023	1542	294	1560	68	12984	701	345	6	322	17	0	0
STRINGTIE	10 bp	corrected	254819	50309	13765	13677	3811	0.278643	1883	402	1526	37	9954	841	413	11	378	22	2	0
STRINGTIE	10 bp	uncorrected	256550	50632	13060	12973	3167	0.244122	1423	215	1529	72	9893	551	275	11	253	10	1	0
STRINGTIE	8 bp	corrected	372570	70140	13954	13866	4344	0.313284	1949	423	1972	54	9610	908	445	14	401	28	2	0
STRINGTIE	8 bp	uncorrected	374657	70587	13060	12973	3512	0.270716	1409	224	1879	82	9548	584	292	14	265	12	1	0

## Sheet: Statistical tests
	SL1 reads	SL2 reads	Total genes	Expressed genes	Trans-spliced genes	SL1 genes	SL2 genes	SL1+SL2 genes	SL2:SL1>2	noTSL genes	Operonic genes	Operons
Total	291,765 (241,023-352,414)	55,725 (48,152-67,057)	16,689 (16,312-20,083)	15,149 (14,561-17,633)	3,682 (3,394-3,865)	1,652 (1,531-1,885)	388 (293-464)	1,573 (1,395-1,780)	52 (38-69)	13,200 (12,594-16,307)	835 (694-922)	408 (341-444)
Genome annotation
de novo	307,882 (251,437-358,332)	59,998 (49,773-67,849)	18,170 (15,722-20,158)	16,128 (14,387-17,706)	3,723 (3,486-4,058)	1,748 (1,550-1,892)	398 (333-464)	1,688 (1,494-1,806)	52 (39-70)	14,490 (11,908-16,342)	860 (754-934)	416 (367-451)
reference	267,172 (216,822-317,592)	49,918 (41,663-58,194)	16,505 (16,380-16,653)	15,149 (15,025-15,296)	3,306 (3,161-3,474)	1,601 (1,531-1,685)	338 (293-388)	1,374 (1,196-1,550)	41 (25-57)	13,200 (13,005-13,394)	733 (694-779)	358 (341-379)
P-value (Wilcoxon rank-sum test)	0.148	0.148	0.538	1	0.064	0.494	0.422	0.064	0.369	1	0.211	0.202
Tsp-SL screening match
10 bp	240,757 (238,428-256,117)	48,137 (47,914-50,551)	16,644 (16,329-19,956)	15,148 (14,646-17,536)	3,398 (3,218-3,688)	1,652 (1,530-1,865)	380 (308-448)	1,392 (1,355-1,528)	44 (26-53)	13,400 (12,935-16,404)	797 (690-902)	385 (337-435)
8 bp	352,805 (349,985-374,135)	67,066 (66,688-70,475)	16,744 (16,329-19,956)	15,194 (14,674-17,536)	3,769 (3,593-4,158)	1,692 (1,555-1,894)	398 (315-472)	1,781 (1,766-1,918)	60 (42-69)	12,998 (12,572-16,071)	860 (734-972)	416 (360-470)
P-value (Wilcoxon rank-sum test)	0	0	0.762	0.85	0.019	0.853	0.496	0	0.173	0.315	0.353	0.29
Annotation correction
corrected	290,829 (243,874-351,410)	55,551 (48,545-66,713)	16,744 (16,637-20,431)	15,318 (14,930-18,005)	3,919 (3,698-4,158)	1,886 (1,857-1,936)	464 (407-482)	1,579 (1,402-1,776)	36 (24-42)	13,212 (12,695-16,276)	922 (860-987)	444 (421-476)
uncorrected	292,275 (245,104-352,996)	55,854 (48,783-67,076)	16,380 (16,312-19,573)	15,024 (14,561-17,244)	3,402 (3,262-3,544)	1,520 (1,412-1,616)	292 (244-373)	1,573 (1,430-1,779)	69 (55-78)	13,186 (12,652-16,227)	684 (626-801)	336 (311-386)
P-value (Wilcoxon rank-sum test)	0.739	0.631	0.185	0.307	0.005	0	0	0.912	0.001	0.739	0.001	0.001
medians and interquartile ranges are presented
