# Supplementary material
Source: HighWire-hosted journal article supplement (doi:10.1101/rna.076414.120)
Supplement: Supplemental_Table_S3.xlsx [file Supplemental_Table_S3.xlsx]

## Sheet: Legend
Supplemental Table S3. Transcripts derived from T. spiralis predicted downstream operonic genes show strict association with SL2-type trans-splicing. The table shows the association between putative T. spiralis (Tsp) operonic genes and the two categories of spliced leader: SL1-type (Tsp-SL1, 3-9, 11, 13-15) or SL2-type (Tsp-SL2, 10, 12). ‘None’ indicates transcripts that are not trans-spliced. Op…

## Sheet: Predicted T. spiralis operons
TSPOP	Tsp Genes	SL-type	Cel Genes	CEOP
	ulp-3	SL1	ulp-3	4052
1	shq-1	none	Y48A5A.1
	Tsp-07337	SL2	NDO	NA
6	arhgap-27	SL1	tag-325	3220
	mettl-5	SL2	C38D4.9
12	snu-23	SL1	snu-23	3452
	magt-1	SL2	ZK686.3
	csl-4	SL2	NDO	NA
13	ulp-1	SL1	ulp-1	3260
	slc-25.A15	SL2	T10F2.2
24	rcl-1	SL1	ZK1127.5	2280
	rnaseh-2C	SL2	ZK1127.13
42	lpd-5	SL1	lpd-5	1176
	ZK973.9	SL2	ZK973.9
	tmem-167B	None	Y62E10A.2	4540
53	fdxr-1	None	Y62E10A.6
	cpped-1	SL2	NDO	NA
62	cpt-2	None	cpt-2	4424
	nuaf-3	SL2	nuaf-3
70	sel-1	SL1	sel-1	5356
	mrps-5	SL2	mrps-5
104	rom-4	None	rom-4
	rwdd-1	SL2	T26E3.4	1672
	par-6	SL2	par-6
112	serinc-2	SL1	Y57E12AL.1	5534
	tmem-258	SL2	Y57E12AM.1
113	csn-6	SL1	csn-6	4538
	mipep-1	SL2	Y67H2A.7
123	rpl-20	SL1	rpl-20	4148
	cyc-2.1	SL2	cyc-2.1
133	zgpa-1	None	zgpa-1	4270
	dif-1	SL2	dif-1	4228
143	nprl-3	SL1	nprl-3	4280
	uxt-1	SL1=SL2	F35H10.6
	emc-3	SL2	emc-3	4544
	nme-5	SL2	NDO	NA
153	fam-210A	SL1	Y56A3A.22	3744
	nft-1	SL2	nft-1
154	ubxn-2	SL1	ubxn-2	4068
	nfda-12	SL2	Y94H6A.8
164	unc-32	SL1	unc-32	3556
	tpk-1	SL2	tpk-1
180	lis-1	SL1	lis-1
	mrps-17	SL2	mrps-17	3372
	pmrp-1	SL2	C05D11.9
224	cyy-1	None	cyy-1	3522
	ptihd-1	SL2	ZK353.9
233	snx-13	SL1	snx-13	4632
	fn3k-1	SL2	Y116A8C.25
259	rps-29	SL1	rps-29	3036
	trpp-11	SL2	trpp-11
261	gop-1	SL1	gop-1	3272
	gop-2	SL2	gop-2
	esyt-2	SL2	esyt-2
	tfbm-1	SL2	tfbm-1	1120
270	isy-1	SL1	isy-1
	rab-51.F	SL2	F44E7.9	5084
	b3glct-1	SL2	ZC250.2
292	let-92	none	let-92	4480
	mob-1	SL2	mob-1
296	eogt-1	SL1	H12D21.10
	ndufaf-2	SL2	Y116A8C.30	4596
	atpaf-2	SL2	Y116A8C.27
345	uqcr-11	SL1	NDO	NA
	spg-20	SL2	spg-20	1332
	abt-1	SL2	F57B10.8
347	snrk-1	SL1	ZK524.4	1396
	lars-2	SL2	lars-2
349	mafr-1	SL1	mafr-1	1628
	arch-1	SL2	arch-1
353	inx-12	SL1	inx-12	1108
	inx-13	SL2	inx-13
358	sgn-1	None	sgn-1
	pigm-1	SL2	pigm-1	2532
	dph-5	SL2	B0491.7
359	trpp-8	SL1	trpp-8	1264
	vha-10	SL2	vha-10
361	zipt-1	SL1	zipt-1	1776
	kiaa-100	SL2	F31C3.3
385	zipt-11	SL1	zipt-11	1256
	mrpl-24	SL2	mrpl-24
388	apg-1	None	apg-1	1904
	hpo-13	SL2	hpo-13
424	mrps-27	SL1	mrps-27	1764
	blos-9	SL2	blos-9
425	mrps-22	SL1	mrps-22	2496
	algn-9	SL2	algn-9
431	lst-6	SL1	lst-6	2276
	sqv-7	SL2	sqv-7
434	ncap-1	SL1	ncap-1	2076
	ubc-26	SL2	ubc-26	2072
	hpo-20	SL2	hpo-20
437	tmem-222	SL1	H20J04.6	2124
	mog-2	SL2	mog-2
438	rtraf-1	SL1	E02H1.5	2436
	adk-6	SL2	E02H1.6
478*	ribo-1	SL1	ribo-1	4204
	impdh-2	SL2	T22D1.3
479*	cul-1	SL1	cul-1	3676
	colg-1	SL2	D2045.9
	stk-16	SL2	D2045.7
480*	slc-25.A3	SL1	F01G4.6	4416
	pigq-1	SL2	pigq-1
481*	exos-4.1	SL1	exos-4.1	4532
	vars-1	SL2	vars-1	5176
	algn-12	SL2	algn-12
