# Supplementary material
Source: HighWire-hosted journal article supplement (doi:10.1101/rna.076414.120)
Supplement: Supplemental_Table_S4.xlsx [file Supplemental_Table_S4.xlsx]

## Sheet: Legend
Supplementary Table S4. Survey of poly(A) sites in the Trichinella spiralis genome and association with intercistronic regions. Numbers of reads in each library that contain 3' tails of 4,6,8 or 10 adenines and poly(A) signals 16-24 bp upstream are presented. Next, predicted poly(A) sites with coverage of 3,5,7 or 10 reads are presented. Below, numbers of poly(A) sites up to 500bp downstream of e…

## Sheet: Read survey
Numbers of polyA reads
		A{4}			A{6}			A{8}			A{10}
Library	Read	polyA tail	+AATAAA	+ any signal	polyA tail	+AATAAA	+ any signal	polyA tail	+AATAAA	+ any signal	polyA tail	+AATAAA	+ any signal
LIB7135	R1	1904508	243773	241513	1422866	197167	202610	304627	42747	47676	113923	21644	20834
LIB7135	R2	1922072	247059	244624	1429977	199208	205034	310180	43947	49667	117857	22284	22145
LIB7136	R1	1756906	227442	224757	1314540	183618	187968	287081	41178	45642	109718	21064	20521
LIB7136	R2	1774010	230580	228738	1321199	185469	191013	291355	42392	47519	112717	21595	21233
LIB7137	R1	2007843	281695	271874	1518524	229168	231517	332759	48420	53872	123847	24295	23468
LIB7137	R2	2026341	285979	277086	1526274	231658	235563	338791	50036	56337	127231	25061	24648
Total		11391680	1516528	1488592	8533380	1226288	1253705	1864793	268720	300713	705293	135943	132849
Numbers of polyA sites
		A{4}	A{6}	A{8}	A{10}		Notes:
Alignments		1405067	1104799	356044	187958		numbers of reads whose 3' end maps to the genome after trimming the polyA tail
raw polyA sites		73478	61293	21054	10457		potential distinct polyA sites (minimum 100 bp apart)
Coverage >= 3		36431	29667	9111	4159		polyA sites defined by at least 3 reads
Coverage >= 5		26536	21567	6225	2901		... at least 5 reads
Coverage >= 7		21536	17349	5019	2363		…
Coverage >= 10		16989	13695	3952	1852		…
polyA sites with 20bp precision							polyA sites where 3' ends of reads map within a 20bp window
Coverage >= 3		23392	19491	6692	3082
Coverage >= 5		15599	12981	4161	1987
Coverage >= 7		12020	9922	3137	1545
Coverage >= 10		8811	7270	2318	1133
Numbers of polyA sites downstream of exons
		Coverage >= 10				Coverage >= 7				Coverage >= 5				Coverage >= 3
Annotations		A{4}	A{6}	A{8}	A{10}	A{4}	A{6}	A{8}	A{10}	A{4}	A{6}	A{8}	A{10}	A{4}	A{6}	A{8}	A{10}
BRAKER		3285	2728	963	518	4507	3766	1313	695	5922	4944	1743	870	8998	7523	2782	1327
BRAKER+TRINITY		3280	2746	951	505	4540	3796	1307	688	5988	4997	1727	859	9097	7614	2800	1336
DENOVO_ALL		1999	1657	585	312	2861	2383	805	423	3819	3190	1082	538	5944	4976	1860	857
REFERENCE		3272	2744	975	530	4481	3750	1319	708	5872	4898	1744	885	8984	7534	2791	1367
STRINGTIE		1873	1556	532	277	2699	2217	746	381	3623	3005	1012	494	5673	4714	1745	791
<= 100bp downstream
BRAKER		916	747	207	99	1202	957	270	125	1479	1180	336	146	2077	1664	472	203
BRAKER+TRINITY		902	737	203	98	1198	948	269	126	1493	1180	345	151	2101	1669	492	222
DENOVO_ALL		980	807	214	107	1334	1058	287	140	1691	1339	379	167	2452	1962	572	254
REFERENCE		760	633	186	72	1030	833	236	92	1277	1039	306	128	1810	1472	459	184
STRINGTIE		582	475	120	53	811	635	160	67	1060	826	222	87	1563	1239	361	143
<= 500bp downstream
BRAKER		2947				3762				4626				6395
BRAKER+TRINITY		2939				3774				4671				6478
DENOVO_ALL		3425				4490				5600				7966
REFERENCE		2640				3434				4230				5896
STRINGTIE		2638				3438				4284				6034
Numbers of polyA sites up to 100 bp downstream of operonic genes
		Coverage >= 10				Coverage >= 7				Coverage >= 5				Coverage >= 3
Operon annotations		A{4}	A{6}	A{8}	A{10}	A{4}	A{6}	A{8}	A{10}	A{4}	A{6}	A{8}	A{10}	A{4}	A{6}	A{8}	A{10}
<= 100bp downstream
BRAKER_BAM.10bp.corr		10	8	4	1	15	10	5	1	17	13	7	2	25	23	10	5
BRAKER_BAM.10bp.uncorr		14	8	4	1	18	9	5	1	19	12	6	1	26	19	8	4
BRAKER_BAM.8bp.corr		12	9	5	1	17	11	6	1	19	14	8	2	27	23	11	6
BRAKER_BAM.8bp.uncorr		15	9	5	1	19	10	6	1	20	13	7	1	27	19	9	5
BRAKER_TRINITY.10bp.corr		13	11	4	1	17	12	5	1	21	16	8	2	29	26	11	5
BRAKER_TRINITY.10bp.uncorr		15	10	4	1	18	10	5	1	20	13	7	1	27	20	9	4
BRAKER_TRINITY.8bp.corr		15	12	5	1	20	14	6	1	24	18	9	2	32	28	13	6
BRAKER_TRINITY.8bp.uncorr		16	11	5	1	19	11	6	1	21	14	8	1	28	21	10	5
DENOVO_ALL.10bp.corr		4	4	1	1	6	6	1	1	13	11	2	1	22	20	3	2
DENOVO_ALL.10bp.uncorr		2	2	1	1	3	3	1	1	6	4	1	1	12	8	2	1
DENOVO_ALL.8bp.corr		5	3	1	1	7	6	1	1	14	11	2	1	23	20	3	2
DENOVO_ALL.8bp.uncorr		1	1	1	1	2	2	1	1	4	2	1	1	10	6	2	1
PRJNA12603.10bp.corr		10	8	4	2	13	9	4	2	17	11	5	2	24	21	7	3
PRJNA12603.10bp.uncorr		12	8	4	2	15	9	4	2	18	11	5	2	24	19	7	3
PRJNA12603.8bp.corr		11	9	5	2	14	10	5	2	18	12	6	2	26	23	8	3
PRJNA12603.8bp.uncorr		12	8	4	2	15	9	4	2	18	11	5	2	24	18	7	3
STRINGTIE.10bp.corr		4	4	1	1	6	6	1	1	11	10	2	1	18	16	3	2
STRINGTIE.10bp.uncorr		3	3	1	1	4	4	1	1	5	4	1	1	9	5	2	1
STRINGTIE.8bp.corr		4	3	1	1	6	6	1	1	11	10	2	1	18	16	3	2
STRINGTIE.8bp.uncorr		2	2	1	1	3	3	1	1	4	3	1	1	8	4	2	1
<= 200bp downstream
BRAKER_BAM.10bp.corr		12				17				20				31
BRAKER_BAM.10bp.uncorr		13				18				20				29
BRAKER_BAM.8bp.corr		12				17				21				31
BRAKER_BAM.8bp.uncorr		14				19				22				32
BRAKER_TRINITY.10bp.corr		17				20				22				33
BRAKER_TRINITY.10bp.uncorr		17				20				21				30
BRAKER_TRINITY.8bp.corr		16				19				23				33
BRAKER_TRINITY.8bp.uncorr		17				19				22				32
DENOVO_ALL.10bp.corr		9				10				16				25
DENOVO_ALL.10bp.uncorr		5				5				6				13
DENOVO_ALL.8bp.corr		9				10				15				24
DENOVO_ALL.8bp.uncorr		4				4				5				12
PRJNA12603.10bp.corr		12				14				20				27
PRJNA12603.10bp.uncorr		12				15				20				26
PRJNA12603.8bp.corr		13				16				22				31
PRJNA12603.8bp.uncorr		13				17				22				29
STRINGTIE.10bp.corr		7				9				13				20
STRINGTIE.10bp.uncorr		3				4				4				8
STRINGTIE.8bp.corr		8				10				14				21
STRINGTIE.8bp.uncorr		4				5				5				9
<= 500bp downstream
BRAKER_BAM.10bp.corr		51				68				79				111
BRAKER_BAM.10bp.uncorr		50				65				75				103
BRAKER_BAM.8bp.corr		55				72				83				116
BRAKER_BAM.8bp.uncorr		53				68				79				107
BRAKER_TRINITY.10bp.corr		48				64				77				106
BRAKER_TRINITY.10bp.uncorr		44				59				69				96
BRAKER_TRINITY.8bp.corr		53				69				82				113
BRAKER_TRINITY.8bp.uncorr		47				61				71				98
DENOVO_ALL.10bp.corr		38				45				62				96
DENOVO_ALL.10bp.uncorr		20				25				33				57
DENOVO_ALL.8bp.corr		44				51				69				103
DENOVO_ALL.8bp.uncorr		20				24				33				57
PRJNA12603.10bp.corr		38				46				56				76
PRJNA12603.10bp.uncorr		41				50				59				79
PRJNA12603.8bp.corr		41				50				61				82
PRJNA12603.8bp.uncorr		39				48				59				79
STRINGTIE.10bp.corr		37				45				58				86
STRINGTIE.10bp.uncorr		22				27				34				51
STRINGTIE.8bp.corr		40				48				62				89
STRINGTIE.8bp.uncorr		20				24				32				48
Median distance to exon of polyA sites up to 100 bp downstream of operonic genes
		Coverage >= 10				Coverage >= 7				Coverage >= 5				Coverage >= 3
Operon annotations		A{4}	A{6}	A{8}	A{10}	A{4}	A{6}	A{8}	A{10}	A{4}	A{6}	A{8}	A{10}	A{4}	A{6}	A{8}	A{10}
<= 100bp downstream
BRAKER_BAM.10bp.corr		36	31.5	20	38	34	30.5	38	38	34	36	31	26	39	39	34.5	38
BRAKER_BAM.10bp.uncorr		36.5	31.5	20	38	35.5	36	38	38	36	37	34.5	38	39.5	39	39	40
BRAKER_BAM.8bp.corr		36	38	38	38	34	36	50.5	38	34	37	34.5	26	39	39	38	40
BRAKER_BAM.8bp.uncorr		38	38	38	38	36	37	50.5	38	37	38	38	38	40	39	40	42
BRAKER_TRINITY.10bp.corr		34	25	20	38	25	19.5	38	38	34	31.5	34.5	26	40	39.5	38	38
BRAKER_TRINITY.10bp.uncorr		35	31.5	20	38	34.5	31.5	38	38	36.5	38	38	38	40	39.5	40	40
BRAKER_TRINITY.8bp.corr		34	31.5	38	38	29.5	31.5	50.5	38	36	38.5	38	26	40	41	40	40
BRAKER_TRINITY.8bp.uncorr		36.5	38	38	38	35	38	50.5	38	38	38.5	40	38	40	40	41	42
DENOVO_ALL.10bp.corr		89	89	61	61	73.5	73.5	61	61	64	61	40.5	61	63.5	62	20	39
DENOVO_ALL.10bp.uncorr		73.5	73.5	61	61	61	61	61	61	65.5	64	61	61	65.5	67	33	61
DENOVO_ALL.8bp.corr		61	92	61	61	26	43	61	61	62	33	40.5	61	61	61	20	39
DENOVO_ALL.8bp.uncorr		61	61	61	61	35	35	61	61	62.5	35	61	61	62.5	64	33	61
PRJNA12603.10bp.corr		39.5	40.5	63.5	67.5	40	39	63.5	67.5	40	39	42	67.5	40.5	39	42	42
PRJNA12603.10bp.uncorr		41	55	84	67.5	42	42	84	67.5	41	39	79	67.5	40.5	40	42	42
PRJNA12603.8bp.corr		40	42	81	67.5	41	40.5	81	67.5	41	39	61.5	67.5	40.5	39	42	42
PRJNA12603.8bp.uncorr		41	55	85	67.5	42	42	85	67.5	41	39	81	67.5	40.5	41	42	42
STRINGTIE.10bp.corr		89	89	61	61	73.5	73.5	61	61	64	47	40.5	61	61	52	20	39
STRINGTIE.10bp.uncorr		86	86	61	61	73.5	73.5	61	61	64	73.5	61	61	61	61	33	61
STRINGTIE.8bp.corr		76.5	92	61	61	43.5	43	61	61	61	29.5	40.5	61	52	40	20	39
STRINGTIE.8bp.uncorr		76.5	76.5	61	61	61	61	61	61	62.5	61	61	61	61	35	33	61
<= 200bp downstream
BRAKER_BAM.10bp.corr		46				53				67.5				67
BRAKER_BAM.10bp.uncorr		53				60				74.5				67
BRAKER_BAM.8bp.corr		38.5				39				82				67
BRAKER_BAM.8bp.uncorr		38.5				39				74.5				64.5
BRAKER_TRINITY.10bp.corr		42				47.5				47.5				62
BRAKER_TRINITY.10bp.uncorr		42				47.5				53				57.5
BRAKER_TRINITY.8bp.corr		38.5				42				42				62
BRAKER_TRINITY.8bp.uncorr		38				39				40.5				44.5
DENOVO_ALL.10bp.corr		119				108				95.5				97
DENOVO_ALL.10bp.uncorr		188				188				127.5				132
DENOVO_ALL.8bp.corr		142				130.5				94				104
DENOVO_ALL.8bp.uncorr		192				192				188				134
PRJNA12603.10bp.corr		65				79.5				78				88
PRJNA12603.10bp.uncorr		65				88				79.5				79.5
PRJNA12603.8bp.corr		42				79.5				78				88
PRJNA12603.8bp.uncorr		42				88				79.5				88
STRINGTIE.10bp.corr		151				140				114				116.5
STRINGTIE.10bp.uncorr		196				173.5				173.5				145.5
STRINGTIE.8bp.corr		135				129.5				104				114
STRINGTIE.8bp.uncorr		173.5				151				151				140
<= 500bp downstream
BRAKER_BAM.10bp.corr		278				274				268				268
BRAKER_BAM.10bp.uncorr		268				266				264				263.5
BRAKER_BAM.8bp.corr		270				268				264				265
BRAKER_BAM.8bp.uncorr		264				262				238				260
BRAKER_TRINITY.10bp.corr		269				269.5				270				267
BRAKER_TRINITY.10bp.uncorr		258				258				262				260
BRAKER_TRINITY.8bp.corr		260.5				260.5				262				261
BRAKER_TRINITY.8bp.uncorr		196				232.5				248				254
DENOVO_ALL.10bp.corr		287.5				272				261				255
DENOVO_ALL.10bp.uncorr		305				314				305				279
DENOVO_ALL.8bp.corr		272				263				249				249
DENOVO_ALL.8bp.uncorr		305				314				305				296
PRJNA12603.10bp.corr		173				213.5				213.5				189
PRJNA12603.10bp.uncorr		238				238				240.5				213.5
PRJNA12603.8bp.corr		165				181				189				189
PRJNA12603.8bp.uncorr		157.5				181				189				189
STRINGTIE.10bp.corr		279				265				263				249
STRINGTIE.10bp.uncorr		305				314				324				279
STRINGTIE.8bp.corr		272				263				261				249
STRINGTIE.8bp.uncorr		314				324				334				296

## Sheet: APAtrap
Numbers of polyA sites
Gene annotations	polyA sites
BRAKER	7828
BRAKER+TRINITY	8441
DENOVO_ALL	5927
REFERENCE	7140
STRINGTIE	5587
Numbers of polyA sites downstream of operonic genes
Operon annotations	<= 100bp downstream	<= 200bp downstream	<= 500bp downstream
BRAKER_BAM.10bp.corr	89	118	143
BRAKER_BAM.10bp.uncorr	88	115	139
BRAKER_BAM.8bp.corr	94	121	147
BRAKER_BAM.8bp.uncorr	94	120	146
BRAKER_TRINITY.10bp.corr	102	124	150
BRAKER_TRINITY.10bp.uncorr	99	120	142
BRAKER_TRINITY.8bp.corr	104	124	151
BRAKER_TRINITY.8bp.uncorr	103	123	147
DENOVO_ALL.10bp.corr	8	12	22
DENOVO_ALL.10bp.uncorr	7	10	14
DENOVO_ALL.8bp.corr	8	12	25
DENOVO_ALL.8bp.uncorr	7	10	14
PRJNA12603.10bp.corr	55	78	101
PRJNA12603.10bp.uncorr	57	82	104
PRJNA12603.8bp.corr	60	81	105
PRJNA12603.8bp.uncorr	64	85	106
STRINGTIE.10bp.corr	0	1	8
STRINGTIE.10bp.uncorr	0	0	0
STRINGTIE.8bp.corr	0	1	10
STRINGTIE.8bp.uncorr	0	0	0
Median distance of polyA site to 3' end of gene
Operon annotations	<= 100bp downstream	<= 200bp downstream	<= 500bp downstream
BRAKER_BAM.10bp.corr	40	59.5	82
BRAKER_BAM.10bp.uncorr	39.5	56	74
BRAKER_BAM.8bp.corr	40	54	74
BRAKER_BAM.8bp.uncorr	40	53.5	69
BRAKER_TRINITY.10bp.corr	39	49	63.5
BRAKER_TRINITY.10bp.uncorr	37	48	60
BRAKER_TRINITY.8bp.corr	39	48	62
BRAKER_TRINITY.8bp.uncorr	39	47	60
DENOVO_ALL.10bp.corr	17.5	42.5	141.5
DENOVO_ALL.10bp.uncorr	55	67	106.5
DENOVO_ALL.8bp.corr	17.5	42.5	205
DENOVO_ALL.8bp.uncorr	55	67	106.5
PRJNA12603.10bp.corr	37	49	88
PRJNA12603.10bp.uncorr	37	49	88
PRJNA12603.8bp.corr	35	45	87
PRJNA12603.8bp.uncorr	37.5	45	68.5
STRINGTIE.10bp.corr	0	138	315
STRINGTIE.10bp.uncorr	0	0	0
STRINGTIE.8bp.corr	0	138	278
STRINGTIE.8bp.uncorr	0	0	0
