# Supplementary material
Source: HighWire-hosted journal article supplement (doi:10.1101/rna.076414.120)
Supplement: Supplemental_Table_S5.xlsx [file Supplemental_Table_S5.xlsx]

## Sheet: Legend
Supplementary Table S5. Ur-motif identification in the Trichinella spiralis genome and association with intercistronic regions. The frequencies of the four Ur motifs in the genome are presented above a detailed breakdown of Ur motifs present up to 100bp upstream of operonic genes across all 20 operon annotation sets. The table below summarises the total Ur motif counts and proportions among downs…

## Sheet: Ur
Ur motif
UAYYUU
regex:TA[CT][CT]TT	407711	matches in T. spiralis genome
TACCTT	21662	0.0531308
TACTTT	80818	0.198224
TATCTT	40278	0.0987906
TATTTT	264953	0.649855
			Operonic genes			Ur motif present <= 100 bp upstream																Ur motif present <= 50 bp upstream
Operon annotation set			Total	Upstream	Downstream	Upstream gene		Downstream gene		Median distance to Ur		TACCTT		TACTTT		TATCTT		TATTTT				Upstream gene		Downstream gene
BRAKER	10 bp	corrected	923	437	486	215	0.491991	310	0.63786	42		3	0.00967742	58	0.187097	14	0.0451613	235	0.758065			145	0.331808	192	0.395062
BRAKER	10 bp	uncorrected	789	376	413	162	0.430851	231	0.559322	47		4	0.017316	40	0.17316	13	0.0562771	174	0.753247			100	0.265957	130	0.31477
BRAKER	8 bp	corrected	1004	475	529	246	0.517895	328	0.620038	42.5		4	0.0121951	61	0.185976	15	0.0457317	248	0.756098			162	0.341053	200	0.378072
BRAKER	8 bp	uncorrected	851	406	445	174	0.428571	246	0.552809	48		5	0.0203252	45	0.182927	13	0.0528455	183	0.743902			107	0.263547	132	0.296629
BRAKER+TRINITY	10 bp	corrected	922	437	485	216	0.494279	313	0.645361	45		2	0.00638978	57	0.182109	13	0.0415335	241	0.769968			142	0.324943	184	0.379381
BRAKER+TRINITY	10 bp	uncorrected	805	383	422	169	0.441253	234	0.554502	48.5		2	0.00854701	42	0.179487	15	0.0641026	175	0.747863			102	0.266319	126	0.298578
BRAKER+TRINITY	8 bp	corrected	992	471	521	246	0.522293	330	0.633397	45		3	0.00909091	60	0.181818	15	0.0454545	252	0.763636			158	0.335456	192	0.368522
BRAKER+TRINITY	8 bp	uncorrected	866	412	454	184	0.446602	250	0.550661	49		3	0.012	46	0.184	16	0.064	185	0.74			113	0.274272	129	0.284141
DENOVO_ALL	10 bp	corrected	963	457	506	212	0.463895	281	0.555336	25		3	0.0106762	54	0.192171	17	0.0604982	207	0.736655			142	0.310722	217	0.428854
DENOVO_ALL	10 bp	uncorrected	618	295	323	110	0.372881	178	0.551084	37		4	0.0224719	24	0.134831	12	0.0674157	138	0.775281			75	0.254237	114	0.352941
DENOVO_ALL	8 bp	corrected	1045	494	551	248	0.502024	300	0.544465	25		4	0.0133333	57	0.19	17	0.0566667	222	0.74			168	0.340081	230	0.417423
DENOVO_ALL	8 bp	uncorrected	648	308	340	117	0.37987	179	0.526471	39		4	0.0223464	27	0.150838	9	0.0502793	139	0.776536			78	0.253247	109	0.320588
REFERENCE	10 bp	corrected	763	366	397	176	0.480874	241	0.607053	42		2	0.00829876	40	0.165975	12	0.0497925	187	0.775934			115	0.314208	141	0.355164
REFERENCE	10 bp	uncorrected	663	320	343	129	0.403125	166	0.483965	47.5		3	0.0180723	37	0.222892	13	0.0783133	113	0.680723			77	0.240625	84	0.244898
REFERENCE	8 bp	corrected	824	395	429	193	0.488608	259	0.60373	42		4	0.015444	41	0.158301	19	0.0733591	195	0.752896			124	0.313924	153	0.356643
REFERENCE	8 bp	uncorrected	701	339	362	139	0.410029	181	0.5	47		4	0.0220994	39	0.21547	18	0.0994475	120	0.662983			83	0.244838	92	0.254144
STRINGTIE	10 bp	corrected	841	402	439	212	0.527363	246	0.560364	23.5		3	0.0121951	43	0.174797	15	0.0609756	185	0.752033			133	0.330846	192	0.437358
STRINGTIE	10 bp	uncorrected	551	264	287	119	0.450758	161	0.560976	34		4	0.0248447	21	0.130435	10	0.0621118	126	0.782609			70	0.265152	109	0.379791
STRINGTIE	8 bp	corrected	908	431	477	238	0.552204	262	0.549266	23.5		4	0.0152672	45	0.171756	15	0.0572519	198	0.755725			151	0.350348	204	0.427673
STRINGTIE	8 bp	uncorrected	584	278	306	124	0.446043	166	0.542484	36		4	0.0240964	23	0.138554	7	0.0421687	132	0.795181			73	0.26259	107	0.349673
Ur motif counts/proportions among genes exclusively spliced to Tsp-SL2/SL10/SL12
	Tsp-SL2	Tsp-SL10	Tsp-SL12		Tsp-SL2	Tsp-SL10	Tsp-SL12
TACCTT	4	6	25		0.0155039	0.0251046	0.0158128
TACTTT	41	40	266		0.158915	0.167364	0.168248
TATCTT	24	18	176		0.0930233	0.0753138	0.111322
TATTTT	189	175	1114		0.732558	0.732218	0.704617
