# Supplementary material
Source: HighWire-hosted journal article supplement (doi:10.1101/rna.076414.120)
Supplement: Supplemental_Table_S6.xlsx [file Supplemental_Table_S6.xlsx]

## Sheet: Legend
Supplementary Table S6. Detailed accounts of genome-wide operon synteny between T. spiralis and C. elegans. The overview sheet summarises across all 20 datasets the numbers of C. elegans homologs of T. spiralis operonic genes, the operon sizes in T. spiralis and the numbers of T. spiralis operons that are syntenic with C. elegans operons. For each of the 20 datasets, a detailed breakdown of each …

## Sheet: Overview
											Operon sizes						Syntenic operons					Syntenic+same size
Genome annotation	SL screening stringency	Annotation correction	Abbreviation	Tsp genes	Cel homologs		in Cel operons			Tsp operons	1	2	3	4	5		2	3	4	5		2	3	4	5
BRAKER	10 bp	corrected	BR10c	923	810	0.877573	420	0.518519		443	6	400	32	4	1		30	1	0	0	0.0699774	11	0	0	0	0.354839
BRAKER	10 bp	uncorrected	BR10u	789	719	0.91128	366	0.50904		382	6	351	21	2	2		24	0	0	0	0.0628272	7	0	0	0	0.291667
BRAKER	8 bp	corrected	BR8c	1004	872	0.868526	435	0.498853		482	7	435	34	5	1		29	1	0	0	0.0622407	11	0	0	0	0.366667
BRAKER	8 bp	uncorrected	BR8u	851	769	0.903643	373	0.485046		413	7	380	22	2	2		24	0	0	0	0.0581114	7	0	0	0	0.291667
BRAKER+TRINITY	10 bp	corrected	BT10c	922	814	0.882863	427	0.52457		442	5	400	32	4	1		31	0	0	0	0.0701357	12	0	0	0	0.387097
BRAKER+TRINITY	10 bp	uncorrected	BT10u	805	734	0.911801	382	0.520436		388	5	354	25	3	1		26	0	0	0	0.0670103	9	0	0	0	0.346154
BRAKER+TRINITY	8 bp	corrected	BT8c	992	862	0.868952	439	0.509281		477	6	434	31	5	1		30	0	0	0	0.0628931	12	0	0	0	0.4
BRAKER+TRINITY	8 bp	uncorrected	BT8u	866	782	0.903002	390	0.498721		418	6	381	27	3	1		26	0	0	0	0.062201	9	0	0	0	0.346154
DENOVO_ALL	10 bp	corrected	DA10c	963	839	0.871236	412	0.491061		469	12	423	31	3	0		24	0	0	0	0.0511727	9	0	0	0	0.375
DENOVO_ALL	10 bp	uncorrected	DA10u	618	547	0.885113	268	0.489945		307	12	280	14	1	0		9	0	0	0	0.029316	4	0	0	0	0.444444
DENOVO_ALL	8 bp	corrected	DA8c	1045	893	0.854545	427	0.478163		509	15	455	36	3	0		24	0	0	0	0.0471513	9	0	0	0	0.375
DENOVO_ALL	8 bp	uncorrected	DA8u	648	562	0.867284	264	0.469751		323	15	292	15	1	0		8	0	0	0	0.0247678	3	0	0	0	0.375
REFERENCE	10 bp	corrected	RE10c	763	658	0.862385	307	0.466565		371	5	342	22	2	0		15	0	0	0	0.0404313	5	0	0	0	0.333333
REFERENCE	10 bp	uncorrected	RE10u	663	589	0.888386	262	0.444822		325	5	302	18	0	0		12	0	0	0	0.0369231	5	0	0	0	0.416667
REFERENCE	8 bp	corrected	RE8c	824	705	0.855583	326	0.462411		402	7	370	23	2	0		16	0	0	0	0.039801	6	0	0	0	0.375
REFERENCE	8 bp	uncorrected	RE8u	701	623	0.88873	273	0.438202		345	6	322	17	0	0		12	0	0	0	0.0347826	5	0	0	0	0.416667
STRINGTIE	10 bp	corrected	ST10c	841	744	0.884661	363	0.487903		413	11	378	22	2	0		20	0	0	0	0.0484262	6	0	0	0	0.3
STRINGTIE	10 bp	uncorrected	ST10u	551	495	0.898367	239	0.482828		275	11	253	10	1	0		7	0	0	0	0.0254545	2	0	0	0	0.285714
STRINGTIE	8 bp	corrected	ST8c	908	790	0.870044	380	0.481013		445	14	401	28	2	0		20	0	0	0	0.0449438	6	0	0	0	0.3
STRINGTIE	8 bp	uncorrected	ST8u	584	516	0.883562	237	0.459302		292	14	265	12	1	0		6	0	0	0	0.0205479	1	0	0	0	0.166667

## Sheet: BR10c
T. spiralis operon	Genes	Homologous C. elegans genes	Homologous C. elegans operonic genes	C. elegans operons	C. elegans operon sizes	Synteny	C. elegans gene IDs	C. elegans gene names	C. elegans operon IDs
TSPOP1	2	1	1	1	8	?	WBGene00021655	Y48A5A.1	CEOP4052
TSPOP10	2	2	1	1	2	1,NA	WBGene00007668;WBGene00012717	C18B12.6;Y39E4B.6b	CEOPX132;NA
TSPOP100	2	1	0	0		?	WBGene00018932	F56B3.8a	NA
TSPOP101	2	2	0	0		?	WBGene00011821;WBGene00020556	T18D3.3a;T19B4.1	NA;NA
TSPOP102	2	2	1	1	3	1,NA	WBGene00008684;WBGene00007697	F11A10.3a;C24F3.2	CEOP4490;NA
TSPOP103	2	1	0	0		?	WBGene00007534	C12D8.1c	NA
TSPOP104	2	2	2	2	5,6	?	WBGene00021752;WBGene00012694	Y50D7A.2;Y39B6A.36	CEOP3851;CEOP5480
TSPOP105	3	3	1	1	2	1,NA,NA	WBGene00010042;WBGene00004749;WBGene00006494	F54C9.6;F57C7.3a;H13N06.5	CEOP2364;NA;NA
TSPOP106	2	2	2	1	2	identical	WBGene00021956;WBGene00021960	Y57E12AL.1a;Y57E12AM.1	CEOP5534;CEOP5534
TSPOP107	2	2	2	1	4	identical	WBGene00000818;WBGene00013464	Y67H2A.6b;Y67H2A.7a	CEOP4538;CEOP4538
TSPOP108	2	1	1	1	3	?	WBGene00044025	T01G1.4	CEOP4639
TSPOP109	2	2	0	0		?	WBGene00012916;WBGene00044631	Y46G5A.28;F55A11.5	NA;NA
TSPOP11	2	2	2	2	2,4	?	WBGene00006701;WBGene00008664	C35B1.1;F10G8.6	CEOP4112;CEOP1584
TSPOP110	2	2	2	1	2	identical	WBGene00021421;WBGene00021423	Y38F2AR.3a;Y38F2AR.5b	CEOP4060;CEOP4060
TSPOP111	2	2	0	0		?	WBGene00001555;WBGene00010356	T04D3.4a;H03A11.1	NA;NA
TSPOP112	2	2	2	2	2,2	?	WBGene00006497;WBGene00021934	F10G7.1;Y55F3AR.3a	CEOP2132;CEOP4046
TSPOP113	2	2	2	2	2,4	?	WBGene00001635;WBGene00001860	Y45F10D.3b;F28B3.7a	CEOP4560;CEOP1208
TSPOP114	2	2	1	1	4	1,NA	WBGene00012643;WBGene00017605	Y39A1A.3;F19F10.9	CEOP3684;NA
TSPOP115	2	2	2	2	3,2	?	WBGene00006607;WBGene00009084	F57B10.7;F23B12.7	CEOP1336;CEOP5420
TSPOP116	2	2	2	2	6,6	?	WBGene00006489;WBGene00019163	ZK856.9;H06H21.6	CEOP5248;CEOP4152
TSPOP117	2	2	2	1	3	reversed	WBGene00017121;WBGene00004432	E04A4.7;E04A4.8	CEOP4148;CEOP4148
TSPOP118	2	1	1	1	2	?	WBGene00010304	F59A2.4a	CEOP3108
TSPOP119	2	2	1	1	2	1,NA	WBGene00002891;WBGene00010722	C56G2.6a;K09E4.4	CEOP3870;NA
TSPOP12	3	3	3	2	2,3	?	WBGene00022793;WBGene00012966;WBGene00022794	ZK686.3;Y48A6B.5;ZK686.4	CEOP3452;CEOP3712;CEOP3452
TSPOP120	2	2	1	1	2	1,NA	WBGene00001983;WBGene00009131	E04A4.4b;F25H8.1b	CEOP4144;NA
TSPOP121	2	1	0	0		?	WBGene00044637	Y47D7A.16a	NA
TSPOP122	2	2	2	2	3,3	?	WBGene00007020;WBGene00007387	Y104H12D.1a;C06H2.3a	CEOP4049;CEOP5276
TSPOP123	2	2	0	0		?	WBGene00014095;WBGene00010134	ZK829.4;F55H12.3	NA;NA
TSPOP124	3	2	0	0		?	WBGene00016844;WBGene00000170	C50F7.4;C01G6.1b	NA;NA
TSPOP125	2	2	1	1	3	1,NA	WBGene00000996;WBGene00022233	F49E8.5;Y73B6BL.4	CEOP4228;NA
TSPOP126	2	2	0	0		?	WBGene00008281;WBGene00013455	C53D6.4b;Y67A10A.6c	NA;NA
TSPOP127	2	2	2	2	2,2	?	WBGene00009006;WBGene00010557	F21D5.1;K04D7.2b	CEOP4300;CEOP4360
TSPOP128	2	2	0	0		?	WBGene00001007;WBGene00003963	C39E9.14a;C07A12.4a	NA;NA
TSPOP129	2	2	1	1	2	1,NA	WBGene00017797;WBGene00000390	F25G6.2;R07G3.1	CEOP5204;NA
TSPOP13	2	2	2	1	6	reversed	WBGene00020422;WBGene00006736	T10F2.2;T10F2.3	CEOP3260;CEOP3260
TSPOP130	2	2	2	2	2,4	?	WBGene00017928;WBGene00022456	F29C4.6;Y110A7A.6b	CEOP4004;CEOP1220
TSPOP131	2	2	0	0		?	WBGene00010741;WBGene00022232	K10D6.1;Y73B6BL.3	NA;NA
TSPOP132	2	1	0	0		?	WBGene00001169;WBGene00001169	R03G5.1d;R03G5.1a	NA;NA
TSPOP133	3	3	2	2	3,5	?	WBGene00013378;WBGene00010809;WBGene00019899	Y62E10A.10;M01F1.3;R05G6.5	CEOP4544;CEOP3124;NA
TSPOP134	2	2	0	0		?	WBGene00010722;WBGene00020517	K09E4.4;T15B7.2	NA;NA
TSPOP135	2	2	2	2	4,3	?	WBGene00000761;WBGene00007111	C24A11.9;B0035.12	CEOP1248;CEOP4440
TSPOP136	2	1	0	0		?	WBGene00007880	C33A12.1	NA
TSPOP137	2	2	2	2	2,2	?	WBGene00009829;WBGene00003407	F47G9.1;F57C12.5c	CEOP5522;CEOPX154
TSPOP138	2	1	0	0		?	WBGene00022861	ZK1193.5e	NA
TSPOP139	2	1	1	1	2	?	WBGene00016374	C33H5.7	CEOP4248
TSPOP14	2	2	2	2	3,2	?	WBGene00021133;WBGene00011144	W10D9.5a;R08D7.4b	CEOP2686;CEOP3560
TSPOP140	2	2	2	2	1,4	?	WBGene00022434;WBGene00006724	Y108G3AL.2;C08B11.7	CEOP5006;CEOP2328
TSPOP141	2	2	2	2	3,3	?	WBGene00022121;WBGene00007645	Y71F9AM.4a;C17E4.6	CEOP1076;CEOP1544
TSPOP142	3	2	1	1	3	1,NA	WBGene00017646;WBGene00011436	F20H11.1;T04F3.1a	CEOP3392;NA
TSPOP143	2	1	1	1	3	?	WBGene00003594	Y56A3A.13	CEOP3744
TSPOP144	2	2	2	2	3,2	?	WBGene00022381;WBGene00022380	Y94H6A.9a;Y94H6A.8	CEOP4665;CEOP4068
TSPOP145	2	2	1	1	2	1,NA	WBGene00011451;WBGene00017534	T04H1.5;F17A9.2	CEOP5336;NA
TSPOP146	2	2	0	0		?	WBGene00017765;WBGene00017037	F25B4.1;D1069.3b	NA;NA
TSPOP147	2	2	1	1	3	1,NA	WBGene00044329;WBGene00018281	F11A10.8;F41D9.1	CEOP4490;NA
TSPOP148	2	2	1	1	2	1,NA	WBGene00004494;WBGene00022416	K02B2.5;Y102A11A.6	CEOP4611;NA
TSPOP149	3	2	1	1	2	1,NA	WBGene00022471;WBGene00011939	Y119C1B.5;T23B5.1a	CEOP1947;NA
TSPOP15	3	3	2	2	3,2	?	WBGene00021133;WBGene00011144;WBGene00006727	W10D9.5a;R08D7.4b;F25B5.4a	CEOP2686;CEOP3560;NA
TSPOP150	2	2	2	1	5	identical	WBGene00009648;WBGene00023422	F43C1.3;F43C1.6	CEOP3164;CEOP3164
TSPOP151	2	2	2	2	2,3	?	WBGene00008769;WBGene00003162	F13G3.11;F20H11.3	CEOP1392;CEOP3392
TSPOP152	2	2	2	1	3	reversed	WBGene00014027;WBGene00006768	ZK637.9b;ZK637.8f	CEOP3556;CEOP3556
TSPOP153	2	2	1	1	3	1,NA	WBGene00006540;WBGene00017811	F58A4.8;F26A1.13	CEOP3608;NA
TSPOP154	2	1	0	0		?	WBGene00001281	F10B5.6	NA
TSPOP155	2	2	0	0		?	WBGene00219217;WBGene00008345	C08F8.15;C56A3.6b	NA;NA
TSPOP156	2	1	1	1	2	?	WBGene00002002	K08E7.2	CEOP4520
TSPOP157	2	2	1	1	3	1,NA	WBGene00008684;WBGene00004228	F11A10.3a;R09H10.4	CEOP4490;NA
TSPOP158	3	2	1	1	7	1,NA	WBGene00009735;WBGene00022801	F45G2.9;ZK688.6a	CEOP3792;NA
TSPOP159	2	2	0	0		?	WBGene00006620;WBGene00002217	C07G1.1;F56E3.3c	NA;NA
TSPOP16	2	2	2	2	1,2	?	WBGene00302986;WBGene00013317	Y37E11AM.4;Y57G11C.22a	CEOP5604;CEOP4661
TSPOP160	2	1	1	1	2	?	WBGene00000247	T19E7.3a	CEOP4172
TSPOP161	2	2	1	1	2	1,NA	WBGene00017734;WBGene00020216	F23C8.5a;T04G9.5	CEOP1044;NA
TSPOP162	2	1	1	1	2	?	WBGene00004759	F45D3.5	CEOP5356
TSPOP163	2	2	1	1	2	1,NA	WBGene00004430;WBGene00019492	Y45F10D.12;K07E3.4b	CEOP4560;NA
TSPOP164	2	2	1	1	3	1,NA	WBGene00015487;WBGene00003047	C05D11.10;T03F6.5	CEOP3372;NA
TSPOP165	2	1	0	0		?	WBGene00003377	C39E6.4	NA
TSPOP166	2	2	0	0		?	WBGene00012600;WBGene00001793	Y38E10A.22a;Y46G5A.31	NA;NA
TSPOP167	2	2	0	0		?	WBGene00022785;WBGene00018867	ZK652.6a;F55A12.10	NA;NA
TSPOP168	2	2	0	0		?	WBGene00003802;WBGene00020276	Y56A3A.17;T05H4.15c	NA;NA
TSPOP169	2	2	1	1	4	1,NA	WBGene00004095;WBGene00003975	F52C9.8f;T28D6.9	CEOP3284;NA
TSPOP170	2	2	1	1	2	1,NA	WBGene00009341;WBGene00012258	F32H2.4;W04G3.5a	CEOP1520;NA
TSPOP171	2	2	0	0		?	WBGene00022798;WBGene00008749	ZK688.3;F13E6.5	NA;NA
TSPOP172	2	2	0	0		?	WBGene00001579;WBGene00001018	F56A11.1;C28H8.12	NA;NA
TSPOP173	2	1	0	0		?	WBGene00018531	F47B3.7	NA
TSPOP174	2	1	1	1	2	?	WBGene00021021	W04B5.4	CEOP3076
TSPOP175	2	2	0	0		?	WBGene00018208;WBGene00019498	F39G3.3;K07E8.7a	NA;NA
TSPOP176	2	1	0	0		?	WBGene00016400	C34D4.4	NA
TSPOP177	2	1	1	1	2	?	WBGene00002185	T27E9.4a	CEOP3800
TSPOP178	2	2	1	1	2	1,NA	WBGene00022078;WBGene00044720	Y69A2AR.7a;Y53F4B.42	CEOP4658;NA
TSPOP179	2	2	1	1	6	1,NA	WBGene00020636;WBGene00022664	T20H4.5;ZK121.2	CEOP3424;NA
TSPOP18	3	2	1	1	3	1,NA	WBGene00011773;WBGene00011775	T14G10.3;T14G10.5d	CEOP4619;NA
TSPOP180	2	2	1	1	3	1,NA	WBGene00017981;WBGene00020687	F32D1.1a;T22D1.10	CEOP5052;NA
TSPOP181	2	2	0	0		?	WBGene00000516;WBGene00003020	T05A6.1;C32F10.2	NA;NA
TSPOP182	2	2	1	1	3	1,NA	WBGene00010230;WBGene00019082	F58A4.9;F59A3.9	CEOP3608;NA
TSPOP183	2	2	1	1	3	1,NA	WBGene00010479;WBGene00020140	K01G5.8a;T01B11.4	CEOP3700;NA
TSPOP184	3	3	1	1	3	1,NA,NA	WBGene00016990;WBGene00010283;WBGene00006786	CD4.4;F58G11.6;Y60A3A.1	CEOP5076;NA;NA
TSPOP185	2	2	0	0		?	WBGene00006786;WBGene00010283	Y60A3A.1;F58G11.6	NA;NA
TSPOP186	2	2	1	1	2	1,NA	WBGene00022599;WBGene00020088	ZC395.10;R119.2	CEOP3276;NA
TSPOP187	2	1	1	1	2	?	WBGene00000564	R01H10.8	CEOP3890
TSPOP188	2	2	1	1	3	1,NA	WBGene00012645;WBGene00019199	Y39A1A.6;H14E04.2b	CEOP3688;NA
TSPOP189	2	2	2	2	3,2	?	WBGene00002850;WBGene00009284	C16A3.3;F31C3.2b	CEOP3368;CEOP1965
TSPOP19	2	1	1	1	3	?	WBGene00015555	C06G3.9	CEOP4208
TSPOP190	2	2	1	1	2	1,NA	WBGene00017547;WBGene00004762	F18A1.6b;F35G12.3a	CEOP2668;NA
TSPOP191	2	2	1	1	4	1,NA	WBGene00004185;WBGene00000101	R166.4;D1022.7b	CEOP2492;NA
TSPOP192	2	2	0	0		?	WBGene00001329;WBGene00016311	T04C10.2a;C32D5.3	NA;NA
TSPOP193	2	2	1	1	3	1,NA	WBGene00001262;WBGene00022055	K10D2.6;Y67D2.5	CEOP3848;NA
TSPOP194	2	2	2	2	2,3	?	WBGene00006840;WBGene00017982	R05D3.7;F32D1.2	CEOP3512;CEOP5052
TSPOP195	2	2	0	0		?	WBGene00005674;WBGene00002008	Y45F10B.6;F43E2.8a	NA;NA
TSPOP196	2	1	1	1	2	?	WBGene00015133	B0303.15	CEOP3538
TSPOP197	2	2	0	0		?	WBGene00020397;WBGene00020160	T10B11.1;T02C5.3b	NA;NA
TSPOP198	2	2	0	0		?	WBGene00002179;WBGene00021074	T22C1.7;W07E6.2a	NA;NA
TSPOP199	2	2	1	1	2	1,NA	WBGene00013209;WBGene00019227	Y54G9A.6;H22K11.4a	CEOP2618;NA
TSPOP2	2	2	1	1	4	1,NA	WBGene00012641;WBGene00018793	Y39A1A.1c;F54C4.1	CEOP3684;NA
TSPOP20	2	2	1	1	4	1,NA	WBGene00004385;WBGene00001161	K08D10.4;Y102A5C.18	CEOP4116;NA
TSPOP200	2	2	1	1	3	1,NA	WBGene00016754;WBGene00015168	C48E7.11;B0403.4	CEOP1316;NA
TSPOP201	2	2	1	1	2	1,NA	WBGene00006729;WBGene00006816	K07B1.3;F54B11.3a	CEOP5224;NA
TSPOP202	2	2	1	1	2	1,NA	WBGene00001617;WBGene00021228	F41B4.4b;Y19D10A.13	CEOPX084;NA
TSPOP203	2	1	1	1	3	?	WBGene00006768	ZK637.8e	CEOP3556
TSPOP204	2	2	1	1	4	1,NA	WBGene00012641;WBGene00016073	Y39A1A.1c;C24H12.4a	CEOP3684;NA
TSPOP205	2	2	2	1	3	identical	WBGene00011730;WBGene00023450	T12D8.2;T12D8.10	CEOP3818;CEOP3818
TSPOP206	2	2	1	1	2	1,NA	WBGene00022704;WBGene00009288	ZK353.9;F31C3.6a	CEOP3522;NA
TSPOP207	2	2	1	1	3	1,NA	WBGene00012204;WBGene00017716	W02B12.9;F22F4.1	CEOP2540;NA
TSPOP208	2	2	1	1	2	1,NA	WBGene00012768;WBGene00006634	Y41E3.10b;F33C8.3	CEOP4685;NA
TSPOP209	2	1	0	0		?	WBGene00010488	K02A11.3	NA
TSPOP21	2	1	1	1	6	?	WBGene00009771	F46B6.6a	CEOP5236
TSPOP210	2	2	2	2	3,2	?	WBGene00010325;WBGene00021844	F59C6.4;Y54E10BR.5	CEOP1616;CEOP1924
TSPOP211	2	2	2	2	4,3	?	WBGene00010615;WBGene00022188	K07A1.9f;Y71H2AR.1	CEOP1552;CEOP3086
TSPOP212	2	2	0	0		?	WBGene00002203;WBGene00002202	F46F2.2b;C03C10.1	NA;NA
TSPOP213	2	2	2	1	2	identical	WBGene00013802;WBGene00013803	Y116A8C.25a;Y116A8C.26b	CEOP4632;CEOP4632
TSPOP214	2	2	1	1	4	1,NA	WBGene00008667;WBGene00007969	F10G8.9b;C36A4.9b	CEOP1584;NA
TSPOP215	2	1	0	0		?	WBGene00010909	M88.7	NA
TSPOP216	2	2	0	0		?	WBGene00002977;WBGene00006780	Y105E8A.7b;B0350.2e	NA;NA
TSPOP217	2	2	1	1	4	1,NA	WBGene00019245;WBGene00001017	H27M09.1;ZK593.5e	CEOP1902;NA
TSPOP218	2	2	1	1	2	1,NA	WBGene00011631;WBGene00012144	T08G11.4b;T28H10.3	CEOP1508;NA
TSPOP219	2	2	1	1	2	1,NA	WBGene00020391;WBGene00022855	T10B5.5b;ZK1127.9b	CEOP5560;NA
TSPOP22	2	2	2	1	5	reversed	WBGene00195239;WBGene00022852	ZK1127.13;ZK1127.5	CEOP2280;CEOP2280
TSPOP220	2	2	2	2	2,3	?	WBGene00011274;WBGene00007021	R53.5;C24H11.6	CEOP2734;CEOP3831
TSPOP221	2	2	0	0		?	WBGene00000875;WBGene00004180	K08E3.6;F58A4.4a	NA;NA
TSPOP222	2	2	1	1	4	1,NA	WBGene00007617;WBGene00016015	C15H11.9;C23G10.8	CEOP5416;NA
TSPOP223	2	1	0	0		?	WBGene00017758	F23H11.2	NA
TSPOP224	2	2	2	1	2	identical	WBGene00004460;WBGene00016249	C30C11.2;C30C11.1	CEOP3528;CEOP3528
TSPOP225	2	2	1	1	3	1,NA	WBGene00018131;WBGene00021738	F37A4.1;Y50D4A.4a	CEOP3400;NA
TSPOP226	2	2	0	0		?	WBGene00016469;WBGene00010403	C36B7.6;H19J13.1	NA;NA
TSPOP227	2	1	1	1	2	?	WBGene00015160	B0361.6	CEOP3833
TSPOP228	2	2	1	1	2	1,NA	WBGene00004681;WBGene00006804	F52G2.2a;Y37D8A.13	CEOP4556;NA
TSPOP229	2	1	0	0		?	WBGene00008882	F16B12.6	NA
TSPOP23	3	1	1	1	3	?	WBGene00003870	C18E9.11a	CEOP2404
TSPOP230	2	2	1	1	2	1,NA	WBGene00000536;WBGene00017010	ZC395.2;D1007.15a	CEOP3280;NA
TSPOP231	2	2	1	1	4	1,NA	WBGene00015809;WBGene00021815	C16A3.4;Y53G8AR.8	CEOP3364;NA
TSPOP232	2	2	2	2	2,2	?	WBGene00022192;WBGene00014218	Y71H2B.2;ZK1098.1a	CEOP3853;CEOP3596
TSPOP233	2	2	1	1	2	1,NA	WBGene00013237;WBGene00016508	Y56A3A.19;C37H5.5	CEOP3738;NA
TSPOP234	2	2	1	1	5	1,NA	WBGene00009648;WBGene00016503	F43C1.3;C37C3.11	CEOP3164;NA
TSPOP235	3	3	2	1	2	2,1,NA	WBGene00010333;WBGene00003882;WBGene00007186	F59E10.3;F59E10.1;B0464.6	CEOP2508;CEOP2508;NA
TSPOP236	3	3	2	2	2,3	?	WBGene00021311;WBGene00019301;WBGene00003593	Y32H12A.2a;K02D10.1b;F42A10.2a	CEOP3292;CEOP3540;NA
TSPOP237	2	2	1	1	5	1,NA	WBGene00010809;WBGene00004255	M01F1.3;T20G5.5	CEOP3124;NA
TSPOP238	2	1	0	0		?	WBGene00000532	C07H4.2	NA
TSPOP239	2	2	2	2	2,2	?	WBGene00015648;WBGene00015173	C09F5.2a;B0412.3a	CEOP3859;CEOP3036
TSPOP24	2	1	2	1	2	1,1	WBGene00012765;WBGene00012765	Y41E3.7c;Y41E3.7a	CEOP4581;CEOP4581
TSPOP240	2	2	1	1	4	1,NA	WBGene00000985;WBGene00003033	C15H11.4;F34D10.5	CEOP5416;NA
TSPOP241	4	4	3	2	5,2	?	WBGene00001660;WBGene00001661;WBGene00006755;WBGene00020443	C34E10.3;C34E10.2;ZK1098.10a;T12A2.15a	CEOP3272;CEOP3272;CEOP3830;NA
TSPOP242	2	2	1	1	3	1,NA	WBGene00006515;WBGene00015104	C05D11.3;B0280.9	CEOP3376;NA
TSPOP243	3	3	2	2	2,3	?	WBGene00022166;WBGene00022167;WBGene00006484	Y71H2AM.1;Y71H2AM.2;F08A8.6	CEOP5632;CEOP3086;NA
TSPOP244	2	2	1	1	2	1,NA	WBGene00020268;WBGene00002079	T05H4.5;Y48G1A.5a	CEOP5112;NA
TSPOP245	2	2	1	1	2	1,NA	WBGene00020268;WBGene00002079	T05H4.5;Y48G1A.5a	CEOP5112;NA
TSPOP246	2	2	1	1	2	1,NA	WBGene00012187;WBGene00001166	W01G7.3;ZK328.2	CEOP2624;NA
TSPOP247	2	2	1	1	2	1,NA	WBGene00007912;WBGene00017963	C34B7.2;F31F4.17	CEOP1464;NA
TSPOP248	2	2	1	1	3	1,NA	WBGene00022402;WBGene00006780	Y97E10AR.7;B0350.2h	CEOP5172;NA
TSPOP249	3	3	2	1	2	1,2,NA	WBGene00018431;WBGene00022576;WBGene00009966	F44E7.9;ZC250.2;F53B7.3	CEOP5084;CEOP5084;NA
TSPOP25	2	1	0	0		?	WBGene00011095	R07B7.11	NA
TSPOP250	2	2	1	1	2	1,NA	WBGene00010279;WBGene00000433	F58G11.1b;ZK265.4a	CEOP5398;NA
TSPOP251	2	2	1	1	2	1,NA	WBGene00004497;WBGene00020835	Y41D4B.5;T27A1.3b	CEOP4640;NA
TSPOP252	2	2	2	2	3,2	?	WBGene00019460;WBGene00021350	K06H7.9;Y37E3.8a	CEOP3480;CEOP1032
TSPOP253	2	1	0	0		?	WBGene00013123	Y52B11A.3a	NA
TSPOP254	2	1	1	1	3	?	WBGene00003059	C48E7.3	CEOP1316
TSPOP255	2	1	0	0		?	WBGene00003417	Y41C4A.14	NA
TSPOP256	2	2	2	2	2,2	?	WBGene00001618;WBGene00007927	C43H6.9c;C34C12.8	CEOPX032;CEOP3120
TSPOP257	2	1	0	0		?	WBGene00014224	ZK1098.7	NA
TSPOP258	2	1	0	0		?	WBGene00011543	T06E8.1a	NA
TSPOP259	2	2	1	1	2	1,NA	WBGene00021363;WBGene00012550	Y37E11AL.8;Y37D8A.10	CEOP4653;NA
TSPOP26	2	2	0	0		?	WBGene00009226;WBGene00015926	F28G4.1;C17H11.6b	NA;NA
TSPOP260	2	2	0	0		?	WBGene00010496;WBGene00018872	K02B12.3;F55C12.5a	NA;NA
TSPOP261	2	1	0	0		?	WBGene00010776	K11E4.4b	NA
TSPOP262	2	2	2	2	1,4	?	WBGene00016427;WBGene00017293	C34H4.5a;F09E5.17	CEOP4631;CEOP2168
TSPOP263	2	2	0	0		?	WBGene00000377;WBGene00008860	T05C12.7;F15D4.3	NA;NA
TSPOP264	2	2	1	1	2	1,NA	WBGene00020366;WBGene00006309	T08G2.3;D1014.1	CEOPX144;NA
TSPOP265	2	2	0	0		?	WBGene00016800;WBGene00013702	C50C3.2;Y106G6D.6	NA;NA
TSPOP266	2	1	0	0		?	WBGene00007059	F08C6.3	NA
TSPOP267	2	2	1	1	5	1,NA	WBGene00001092;WBGene00006856	F53A2.5;C13B4.2	CEOP3784;NA
TSPOP268	2	2	1	1	2	1,NA	WBGene00020417;WBGene00008920	T10E9.7;F17C11.9a	CEOP1326;NA
TSPOP269	2	2	1	1	2	1,NA	WBGene00011247;WBGene00002248	R11D1.9;T22A3.8	CEOP5368;NA
TSPOP27	2	2	2	2	2,3	?	WBGene00006728;WBGene00022803	ZK1010.1;ZK688.9	CEOP3768;CEOP3462
TSPOP270	2	2	1	1	2	1,NA	WBGene00001151;WBGene00004488	F38H4.8a;T05F1.3	CEOP4660;NA
TSPOP271	2	2	2	2	2,3	?	WBGene00009551;WBGene00011722	F38H4.10;T11G6.8a	CEOP4480;CEOP4396
TSPOP272	2	2	0	0		?	WBGene00018860;WBGene00018076	F55A4.8d;F35H12.4	NA;NA
TSPOP273	3	3	2	1	6	1,2,NA	WBGene00013804;WBGene00013807;WBGene00010386	Y116A8C.27a;Y116A8C.30a;H12D21.10a	CEOP4596;CEOP4596;NA
TSPOP274	2	2	1	1	5	1,NA	WBGene00008236;WBGene00007784	C50F4.12;C27H6.2	CEOP5232;NA
TSPOP275	2	2	1	1	2	1,NA	WBGene00013236;WBGene00000800	Y56A3A.18;Y23H5A.7c	CEOP3740;NA
TSPOP276	2	2	1	1	2	1,NA	WBGene00017919;WBGene00016611	F29B9.1;C43G2.2b	CEOP4136;NA
TSPOP277	2	2	2	2	4,3	?	WBGene00006931;WBGene00008685	T20D3.7d;F11A10.4a	CEOP4328;CEOP4492
TSPOP278	2	2	1	1	2	1,NA	WBGene00022056;WBGene00015913	Y67D2.6;C17F4.7	CEOP3860;NA
TSPOP279	2	2	1	1	3	1,NA	WBGene00009992;WBGene00000478	F53F4.10;F27E11.3	CEOP5392;NA
TSPOP28	2	2	2	2	3,2	?	WBGene00007101;WBGene00003583	B0024.11;EEED8.8	CEOP5252;CEOP2743
TSPOP280	2	2	1	1	2	1,NA	WBGene00011017;WBGene00018181	R04F11.5;F38E1.9	CEOP5344;NA
TSPOP281	2	2	0	0		?	WBGene00021292;WBGene00013093	Y25C1A.5;Y51H1A.2e	NA;NA
TSPOP282	2	2	1	1	2	1,NA	WBGene00013789;WBGene00002163	Y116A8C.9a;C54D1.3c	CEOP4592;NA
TSPOP283	2	2	0	0		?	WBGene00009145;WBGene00003411	F26A3.7;F14F4.3	NA;NA
TSPOP284	3	3	1	1	2	1,NA,NA	WBGene00022296;WBGene00019953;WBGene00018135	Y76B12C.2;R08C7.10b;F37A4.5	CEOP4056;NA;NA
TSPOP285	2	2	1	1	2	1,NA	WBGene00003582;WBGene00008430	F52G2.1c;D2085.5b	CEOP4556;NA
TSPOP286	2	1	1	1	6	?	WBGene00004882	F46B6.3b	CEOP5236
TSPOP287	2	2	2	1	2	identical	WBGene00007113;WBGene00007114	B0035.15;B0035.16	CEOP4428;CEOP4428
TSPOP288	2	2	1	1	3	1,NA	WBGene00013434;WBGene00009211	Y66D12A.8a;F28D1.1	CEOP3723;NA
TSPOP289	2	2	2	2	2,2	?	WBGene00010725;WBGene00007026	K09E9.2;F32H2.2a	CEOPX156;CEOP1512
TSPOP29	2	2	2	1	4	identical	WBGene00004055;WBGene00018356	B0218.3;F42G8.5	CEOP4272;CEOP4272
TSPOP290	2	1	0	0		?	WBGene00019148	H03E18.1	NA
TSPOP291	2	2	0	0		?	WBGene00003562;WBGene00009793	F09G8.4;F46F6.2a	NA;NA
TSPOP292	2	2	1	1	2	1,NA	WBGene00003064;WBGene00009460	R10H10.1;F36A2.13	CEOP4376;NA
TSPOP293	2	2	0	0		?	WBGene00006836;WBGene00007179	C47E8.7;B0457.4	NA;NA
TSPOP294	2	1	0	0		?	WBGene00007155	B0379.1a	NA
TSPOP295	2	2	1	1	2	1,NA	WBGene00015513;WBGene00017814	C06A8.2;F26A10.2	CEOP2731;NA
TSPOP296	2	2	0	0		?	WBGene00000911;WBGene00044732	C10C5.6b;T03G11.10	NA;NA
TSPOP297	2	2	1	1	4	1,NA	WBGene00013218;WBGene00012830	Y54G11A.9;Y43F8C.8	CEOP2636;NA
TSPOP298	2	2	0	0		?	WBGene00002074;WBGene00005149	F32E10.4;B0495.1	NA;NA
TSPOP299	2	2	0	0		?	WBGene00007260;WBGene00004854	C02C6.2a;F40E10.4	NA;NA
TSPOP3	2	2	1	1	2	1,NA	WBGene00007528;WBGene00014215	C11H1.2;ZK1086.1b	CEOPX134;NA
TSPOP30	2	2	0	0		?	WBGene00011071;WBGene00013400	R06F6.8b;Y62H9A.12	NA;NA
TSPOP300	2	1	1	1	2	?	WBGene00021348	Y37E3.4	CEOP1028
TSPOP301	2	2	0	0		?	WBGene00002031;WBGene00016406	Y34B4A.3;C34D10.1	NA;NA
TSPOP302	2	2	2	2	2,2	?	WBGene00020909;WBGene00011239	W01A11.1a;R11A8.5	CEOP5118;CEOP4372
TSPOP303	2	1	1	1	2	?	WBGene00017016	D1014.3a	CEOP5180
TSPOP304	2	2	0	0		?	WBGene00010699;WBGene00012337	K08H10.9;W07G4.3	NA;NA
TSPOP305	2	2	1	1	2	1,NA	WBGene00015579;WBGene00017085	C07H6.2;E01A2.2a	CEOP3849;NA
TSPOP306	2	2	1	1	4	1,NA	WBGene00018610;WBGene00017313	F48E8.3;F09G2.4	CEOP3304;NA
TSPOP307	3	3	2	2	2,2	?	WBGene00010037;WBGene00013332;WBGene00011175	F54C8.4a;Y57G11C.43;R09E10.5	CEOP3580;CEOP4667;NA
TSPOP308	2	2	2	2	3,3	?	WBGene00007760;WBGene00011067	C27B7.2;R06F6.2	CEOP4312;CEOP2504
TSPOP309	2	2	1	1	3	1,NA	WBGene00017062;WBGene00007980	D2063.3a;C36E8.1	CEOP5052;NA
TSPOP31	2	2	0	0		?	WBGene00008029;WBGene00006619	C39E9.5;ZK546.15	NA;NA
TSPOP310	2	1	0	0		?	WBGene00011834	T19B10.6	NA
TSPOP311	2	2	1	1	2	1,NA	WBGene00010231;WBGene00003394	F58B3.4;T07H6.2	CEOP4460;NA
TSPOP312	2	2	1	1	3	1,NA	WBGene00004205;WBGene00004446	F29B9.4c;T24B8.1a	CEOP4128;NA
TSPOP313	2	1	1	1	2	?	WBGene00017360	F10E9.11	CEOP3504
TSPOP314	3	3	3	2	2,3	?	WBGene00010993;WBGene00011334;WBGene00006369	R03E1.2;T01E8.6;R03E1.1	CEOPX128;CEOP2472;CEOPX128
TSPOP315	2	2	1	1	4	1,NA	WBGene00006446;WBGene00009200	F28F8.6;F28C1.1	CEOP5444;NA
TSPOP316	2	1	0	0		?	WBGene00010459	K01C8.7a	NA
TSPOP317	2	2	1	1	4	1,NA	WBGene00021377;WBGene00019825	Y37E11B.5;R02D3.8	CEOP4100;NA
TSPOP318	2	1	0	0		?	WBGene00021060	W06B11.3	NA
TSPOP319	2	1	1	1	2	?	WBGene00006626	F10G7.2	CEOP2132
TSPOP32	2	2	0	0		?	WBGene00021930;WBGene00021920	Y55F3AM.13;Y55F3AM.1	NA;NA
TSPOP320	2	2	1	1	2	1,NA	WBGene00006647;WBGene00019998	F53G2.6b;R10H1.1	CEOP2070;NA
TSPOP321	2	2	1	1	2	1,NA	WBGene00019333;WBGene00016331	K02F3.10;C32F10.1b	CEOP3040;NA
TSPOP322	2	2	1	1	2	1,NA	WBGene00004897;WBGene00000992	T10H9.4;F27D9.6	CEOP5128;NA
TSPOP323	2	2	0	0		?	WBGene00010933;WBGene00000368	M162.7;T28F2.5	NA;NA
TSPOP325	3	3	3	1	5	3,1,2	WBGene00019007;WBGene00019005;WBGene00019006	F57B10.14;F57B10.8;F57B10.9	CEOP1332;CEOP1332;CEOP1332
TSPOP326	2	1	0	0		?	WBGene00002299	ZK1067.1d	NA
TSPOP327	2	2	2	2	2,4	?	WBGene00017919;WBGene00017283	F29B9.1;F09E5.3	CEOP4136;CEOP2168
TSPOP328	2	2	2	1	3	reversed	WBGene00016622;WBGene00016621	C43H8.2;C43H8.1	CEOP1628;CEOP1628
TSPOP329	2	1	1	1	2	?	WBGene00013344	Y59A8B.7	CEOP5464
TSPOP33	2	2	2	1	2	identical	WBGene00000222;WBGene00009726	F45E6.2;F45E6.3	CEOPX108;CEOPX108
TSPOP330	2	2	0	0		?	WBGene00008136;WBGene00012791	C47D12.2;Y43D4A.5d	NA;NA
TSPOP331	2	2	0	0		?	WBGene00006876;WBGene00001534	ZK1151.1b;F52E1.4a	NA;NA
TSPOP332	2	2	0	0		?	WBGene00022171;WBGene00002123	Y71H2AM.6a;C16E9.4b	NA;NA
TSPOP333	3	3	1	1	5	1,NA,NA	WBGene00015191;WBGene00009443;WBGene00022277	B0432.10;F35G12.7;Y74C9A.3	CEOP2020;NA;NA
TSPOP334	3	3	2	1	2	2,1,NA	WBGene00007194;WBGene00007189;WBGene00004790	B0491.7;B0491.1;F07H5.2	CEOP2532;CEOP2532;NA
TSPOP335	2	2	2	1	3	reversed	WBGene00018512;WBGene00006919	F46F11.9a;F46F11.5	CEOP1264;CEOP1264
TSPOP336	2	2	0	0		?	WBGene00017066;WBGene00001209	D2092.5;C27D11.1	NA;NA
TSPOP337	2	2	2	1	3	identical	WBGene00009285;WBGene00009286	F31C3.3;F31C3.4	CEOP1776;CEOP1776
TSPOP338	2	1	0	0		?	WBGene00016002	C18H9.3c	NA
TSPOP339	2	1	0	0		?	WBGene00015522	C06E1.7	NA
TSPOP34	2	2	1	1	3	1,NA	WBGene00001497;WBGene00019928	T08B2.9b;R07C3.12	CEOP1312;NA
TSPOP340	2	2	0	0		?	WBGene00015125;WBGene00017098	B0303.3;E02D9.1c	NA;NA
TSPOP341	2	2	1	1	3	1,NA	WBGene00000426;WBGene00004888	Y106G6E.5b;K12C11.2	CEOP1592;NA
TSPOP342	2	2	1	1	2	1,NA	WBGene00007009;WBGene00023407	Y65B4BR.4d;F56D1.6	CEOP1934;NA
TSPOP343	2	2	2	1	4	identical	WBGene00006958;WBGene00011058	R06C1.3a;R06C1.2	CEOP1660;CEOP1660
TSPOP344	2	2	1	1	2	1,NA	WBGene00001056;WBGene00016494	K02F2.1a;C37A2.8a	CEOP1999;NA
TSPOP345	2	1	1	1	2	?	WBGene00017929	F29C4.7b	CEOP4004
TSPOP346	2	2	2	2	4,3	?	WBGene00011975;WBGene00008134	T24B1.1;C47B2.9	CEOP1416;CEOP1786
TSPOP347	3	3	2	2	2,2	?	WBGene00004117;WBGene00020441;WBGene00004478	F02E9.4b;T12A2.7;F40F8.10	CEOP1980;CEOP3360;NA
TSPOP348	2	2	1	1	2	1,NA	WBGene00003148;WBGene00022733	H21P03.1;ZK418.3	CEOP4444;NA
TSPOP349	2	2	1	1	2	1,NA	WBGene00021854;WBGene00012398	Y54F10AR.1;Y6E2A.4	CEOP3861;NA
TSPOP35	2	1	0	0		?	WBGene00010375	H09F14.1c	NA
TSPOP350	2	2	2	2	3,2	?	WBGene00003224;WBGene00011867	C09G4.5;T20G5.1	CEOP4294;CEOP3858
TSPOP351	2	2	1	1	3	1,NA	WBGene00012645;WBGene00018213	Y39A1A.6;F39H12.2	CEOP3688;NA
TSPOP352	2	2	1	1	5	1,NA	WBGene00001740;WBGene00004130	ZC395.6;F54E2.3j	CEOP3272;NA
TSPOP353	2	2	1	1	2	1,NA	WBGene00015466;WBGene00008225	C05C8.9a;C50B8.3	CEOP5152;NA
TSPOP354	2	2	2	1	2	reversed	WBGene00019077;WBGene00019076	F59A3.4;F59A3.3	CEOP1256;CEOP1256
TSPOP355	2	2	0	0		?	WBGene00009920;WBGene00009099	F52B5.1a;F25B3.2	NA;NA
TSPOP356	2	2	1	1	2	1,NA	WBGene00009050;WBGene00004368	F22D6.2;C32E8.7	CEOP1364;NA
TSPOP357	3	3	1	1	2	1,NA,NA	WBGene00003794;WBGene00010941;WBGene00000417	Y41D4B.19b;M176.2;C48D1.2b	CEOP4615;NA;NA
TSPOP358	2	2	2	1	3	identical	WBGene00000158;WBGene00013670	Y105E8A.9;Y105E8A.10c	CEOP1904;CEOP1904
TSPOP359	2	1	1	1	2	?	WBGene00006751	C32E8.10d	CEOP1112
TSPOP36	2	2	2	2	2,2	?	WBGene00006590;WBGene00000940	ZC395.3a;Y113G7A.9a	CEOP3280;CEOP5500
TSPOP360	2	2	1	1	2	1,NA	WBGene00009452;WBGene00003953	F36A2.2;F39H11.5	CEOP1504;NA
TSPOP361	2	1	0	0		?	WBGene00007705	C25A1.1	NA
TSPOP362	2	1	1	1	2	?	WBGene00004034	F09E5.1	CEOP2745
TSPOP363	2	2	1	1	2	1,NA	WBGene00022045;WBGene00016331	Y66H1A.3;C32F10.1a	CEOP4028;NA
TSPOP364	2	2	1	1	3	1,NA	WBGene00011065;WBGene00010416	R06C7.6;H25P06.1	CEOP1380;NA
TSPOP365	2	1	1	1	4	?	WBGene00018149	F37C12.1	CEOP3416
TSPOP366	2	1	0	0		?	WBGene00000269	Y73E7A.7a	NA
TSPOP367	2	2	1	1	2	1,NA	WBGene00009563;WBGene00010730	F39H2.3;K10C3.2	CEOP1496;NA
TSPOP368	2	2	1	1	4	1,NA	WBGene00010437;WBGene00022199	JC8.5a;Y71H10A.1a	CEOP4536;NA
TSPOP369	2	2	0	0		?	WBGene00001045;WBGene00009162	Y47H9C.5a;F26E4.7a	NA;NA
TSPOP37	2	1	0	0		?	WBGene00007197	B0513.5a	NA
TSPOP370	2	1	0	0		?	WBGene00007744	C26D10.3	NA
TSPOP371	2	2	1	1	2	1,NA	WBGene00010665;WBGene00022373	K08E3.5a;Y92H12BR.8	CEOP3829;NA
TSPOP372	2	2	0	0		?	WBGene00001037;WBGene00019673	T05C3.5;K12C11.1a	NA;NA
TSPOP373	2	2	1	1	2	1,NA	WBGene00004895;WBGene00021536	CC4.3;Y42H9AR.1	CEOP1682;NA
TSPOP374	2	2	1	1	1	1,NA	WBGene00020955;WBGene00044763	W02G9.5c;ZK688.12	CEOP5531;NA
TSPOP375	2	2	1	1	4	1,NA	WBGene00011972;WBGene00004194	T23G11.7b;C34C6.6a	CEOP1416;NA
TSPOP376	2	2	1	1	2	1,NA	WBGene00011272;WBGene00012735	R53.2;Y40B1A.4	CEOP2746;NA
TSPOP377	2	1	1	1	2	?	WBGene00017924	F29B9.10	CEOP4132
TSPOP378	2	2	0	0		?	WBGene00004809;WBGene00004807	F44G3.6;F46A9.5	NA;NA
TSPOP379	2	2	2	2	2,3	?	WBGene00013041;WBGene00010731	Y49E10.22;K10C3.4a	CEOP3893;CEOP1566
TSPOP38	3	3	1	1	1	1,NA,NA	WBGene00016592;WBGene00003084;WBGene00009811	C42C1.15;R160.7;F47B8.10	CEOP4508;NA;NA
TSPOP380	2	2	0	0		?	WBGene00000792;WBGene00006062	F11C7.4;F30A10.8	NA;NA
TSPOP381	2	2	0	0		?	WBGene00021095;WBGene00001118	W08F4.6;ZK520.3a	NA;NA
TSPOP382	2	2	0	0		?	WBGene00006807;WBGene00022744	C17D12.2c;ZK470.1	NA;NA
TSPOP383	2	2	1	1	3	1,NA	WBGene00012964;WBGene00000776	Y48A6B.3;T03E6.7a	CEOP3712;NA
TSPOP384	2	1	0	0		?	WBGene00000197	F28H1.3	NA
TSPOP385	2	2	2	1	3	reversed	WBGene00021683;WBGene00000812	Y48G1C.10a;Y48G1C.2a	CEOP1940;CEOP1940
TSPOP386	3	2	1	1	7	1,NA	WBGene00000796;WBGene00022647	C14A4.4a;ZK54.1a	CEOP2496;NA
TSPOP387	2	2	0	0		?	WBGene00009233;WBGene00006657	F28H6.4;T12C9.3f	NA;NA
TSPOP388	2	1	0	0		?	WBGene00001771	T28A11.11	NA
TSPOP389	4	3	2	2	3,5	?	WBGene00009187;WBGene00016142;WBGene00019143	F27D4.1;C26E6.6;H01M10.1	CEOP1989;CEOP3244;NA
TSPOP39	2	2	1	1	2	1,NA	WBGene00022044;WBGene00006578	Y66H1A.2a;F25H2.1	CEOP4028;NA
TSPOP390	2	2	1	1	2	1,NA	WBGene00017088;WBGene00013852	E01A2.6;ZC101.3	CEOP1892;NA
TSPOP391	2	2	2	2	2,2	?	WBGene00004355;WBGene00011629	T07D4.3a;T08G11.1b	CEOP2706;CEOP1508
TSPOP392	2	1	1	1	4	?	WBGene00010766	K11B4.1	CEOP1764
TSPOP393	2	2	2	1	7	reversed	WBGene00007564;WBGene00007556	C14A4.14;C14A4.3	CEOP2496;CEOP2496
TSPOP394	2	1	0	0		?	WBGene00011580	T07D4.4e	NA
TSPOP395	2	1	0	0		?	WBGene00003928	ZK945.2	NA
TSPOP396	2	2	2	2	4,3	?	WBGene00001486;WBGene00009002	F59G1.7;F21C3.3	CEOP2232;CEOP1384
TSPOP397	2	2	2	1	2	reversed	WBGene00016889;WBGene00005025	C52E12.4;C52E12.3	CEOP2276;CEOP2276
TSPOP398	2	1	1	1	2	?	WBGene00008078	C44B9.1	CEOP3813
TSPOP4	3	3	2	2	3,2	?	WBGene00008364;WBGene00007752;WBGene00012927	D1046.3;C26H9A.2d;Y47D3A.14	CEOP4316;CEOP4654;NA
TSPOP40	2	2	2	2	2,2	?	WBGene00018161;WBGene00001372	F38A5.2b;R09B3.1a	CEOP4184;CEOP1656
TSPOP400	2	2	2	2	2,2	?	WBGene00006963;WBGene00011352	K07G5.2;T01H8.1e	CEOP1911;CEOP1937
TSPOP401	2	2	1	1	2	1,NA	WBGene00022450;WBGene00013902	Y110A2AM.3a;ZC455.1a	CEOP2074;NA
TSPOP402	2	2	0	0		?	WBGene00007302;WBGene00009217	C04F12.8;F28D1.8	NA;NA
TSPOP403	2	2	1	1	2	1,NA	WBGene00006833;WBGene00019491	F53F10.4c;K07E3.2	CEOP1116;NA
TSPOP404	2	2	2	1	6	identical	WBGene00003390;WBGene00019221	H20J04.8;H20J04.6	CEOP2124;CEOP2124
TSPOP405	2	1	1	1	5	?	WBGene00008458	E02H1.6	CEOP2436
TSPOP406	2	1	1	1	2	?	WBGene00007603	C15C6.4	CEOP1664
TSPOP407	2	1	0	0		?	WBGene00017904	F28F5.3c	NA
TSPOP408	2	1	0	0		?	WBGene00020068	R13F6.10	NA
TSPOP409	2	1	0	0		?	WBGene00009552	F39B1.1	NA
TSPOP41	2	2	2	1	2	identical	WBGene00003061;WBGene00022835	ZK973.10;ZK973.9	CEOP1176;CEOP1176
TSPOP410	2	2	2	2	4,2	?	WBGene00006946;WBGene00012714	C34E10.4b;Y39E4B.1	CEOP3268;CEOP3819
TSPOP411	2	2	0	0		?	WBGene00016674;WBGene00011441	C45G9.2;T04F8.2	NA;NA
TSPOP412	2	2	0	0		?	WBGene00000817;WBGene00000959	B0547.1;F46H6.2a	NA;NA
TSPOP413	2	1	0	0		?	WBGene00019627	K10D2.1a	NA
TSPOP414	2	2	2	2	4,2	?	WBGene00000202;WBGene00017286	Y6D11A.1;F09E5.8	CEOP3044;CEOP2164
TSPOP415	2	2	0	0		?	WBGene00009856;WBGene00021929	F49A5.4a;Y55F3AM.12	NA;NA
TSPOP416	2	2	1	1	2	1,NA	WBGene00000184;WBGene00004298	Y116A8C.12;W06D4.6	CEOP4669;NA
TSPOP417	2	2	2	2	3,4	?	WBGene00013361;WBGene00010721	Y60A3A.13c;K09E4.3a	CEOP5496;CEOP2628
TSPOP418	2	2	1	1	2	1,NA	WBGene00006708;WBGene00021883	Y54G2A.31;Y54G2A.18	CEOP4072;NA
TSPOP419	2	1	0	0		?	WBGene00000162	W09G10.4a	NA
TSPOP42	2	2	2	2	2,2	?	WBGene00013920;WBGene00013231	ZC506.3;Y56A3A.11	CEOPX107;CEOP3736
TSPOP420	2	2	2	2	4,4	?	WBGene00016390;WBGene00016412	C34B2.5;C34E10.11	CEOP1636;CEOP3268
TSPOP421	2	1	0	0		?	WBGene00009881	F49C12.12a	NA
TSPOP422	2	1	0	0		?	WBGene00018193	F39C12.1	NA
TSPOP423	2	2	2	1	2	reversed	WBGene00012756;WBGene00001235	Y41C4A.9;Y41C4A.10	CEOP3728;CEOP3728
TSPOP424	2	2	0	0		?	WBGene00013111;WBGene00013109	Y51H4A.17a;Y51H4A.15	NA;NA
TSPOP425	2	2	1	1	5	1,NA	WBGene00021758;WBGene00003006	Y50D7A.10;Y71F9B.5c	CEOP3851;NA
TSPOP426	2	1	0	0		?	WBGene00010023	F54B8.9	NA
TSPOP427	3	2	2	2	3,3	?	WBGene00006997;WBGene00021208	ZK546.1d;Y18H1A.2a	CEOP2690;CEOP1014
TSPOP428	2	2	0	0		?	WBGene00012739;WBGene00002228	Y40B1B.7;C06G3.2	NA;NA
TSPOP429	1	1	0	0		?	WBGene00016456	C35E7.4	NA
TSPOP43	2	2	2	2	3,2	?	WBGene00021904;WBGene00001566	Y55B1AL.2;C28C12.9	CEOP3828;CEOP4292
TSPOP430	2	2	2	2	2,5	?	WBGene00017286;WBGene00007201	F09E5.8;B0564.1a	CEOP2164;CEOP4532
TSPOP432	1	1	0	0		?	WBGene00000100	C25A11.4m	NA
TSPOP433	2	2	1	1	4	1,NA	WBGene00006946;WBGene00017922	C34E10.4b;F29B9.7	CEOP3268;NA
TSPOP434	1	1	1	1	5	?	WBGene00001823	ZC395.7	CEOP3272
TSPOP435	2	2	0	0		?	WBGene00015286;WBGene00011280	C01B12.3;R74.6	NA;NA
TSPOP436	2	1	1	1	4	?	WBGene00017889	F28B3.10	CEOP1208
TSPOP437	2	2	2	2	4,2	?	WBGene00006946;WBGene00012714	C34E10.4b;Y39E4B.1	CEOP3268;CEOP3819
TSPOP438	2	2	2	1	3	identical	WBGene00008006;WBGene00008008	C38D4.5b;C38D4.9	CEOP3220;CEOP3220
TSPOP439	1	1	0	0		?	WBGene00003412	F20B6.3	NA
TSPOP44	2	2	2	2	2,2	?	WBGene00018513;WBGene00011776	F46F11.10;T14G10.7	CEOP1272;CEOP4356
TSPOP440	2	2	2	2	3,4	?	WBGene00022759;WBGene00000838	ZK546.2b;Y108G3AL.1b	CEOP2690;CEOP5588
TSPOP441	1	1	1	1	3	?	WBGene00010130	F55H2.2	CEOP3880
TSPOP442	2	2	2	2	2,2	?	WBGene00000940;WBGene00013997	Y113G7A.9a;ZK550.3	CEOP5500;CEOP4600
TSPOP443	2	2	2	2	3,6	?	WBGene00015353;WBGene00020110	C02F5.13;R151.7b	CEOP3496;CEOP3424
TSPOP45	2	2	2	2	2,5	?	WBGene00014938;WBGene00016375	Y62E10A.11;C33H5.8	CEOP4548;CEOP4252
TSPOP46	2	2	2	2	3,3	?	WBGene00006392;WBGene00015793	K03B4.3a;C15C7.7	CEOP5060;CEOPX040
TSPOP47	2	2	1	1	2	1,NA	WBGene00011941;WBGene00010033	T23B5.4a;F54B11.10	CEOP4654;NA
TSPOP48	4	3	2	2	4,3	?	WBGene00011860;WBGene00004424;WBGene00006393	T20D3.8;JC8.3a;F48D6.1	CEOP4328;CEOP4535;NA
TSPOP49	2	2	1	1	4	1,NA	WBGene00007616;WBGene00007882	C15H11.8;C33A12.3a	CEOP5416;NA
TSPOP5	2	2	1	1	4	1,NA	WBGene00013462;WBGene00018740	Y67H2A.4d;F53B3.1	CEOP4538;NA
TSPOP50	2	1	0	0		?	WBGene00006460;WBGene00006460	F25D1.1c;F25D1.1b	NA;NA
TSPOP51	2	2	2	2	3,3	?	WBGene00019822;WBGene00021515	R02D3.4b;Y41D4B.12a	CEOP4008;CEOP4047
TSPOP52	2	2	0	0		?	WBGene00045242;WBGene00016913	C05B5.11;C54D1.5	NA;NA
TSPOP53	2	2	2	2	3,6	?	WBGene00013376;WBGene00015238	Y62E10A.6;B0511.13b	CEOP4540;CEOP1632
TSPOP54	2	2	2	2	3,2	?	WBGene00017999;WBGene00016740	F33D4.7;C48B6.2	CEOP4240;CEOP1356
TSPOP55	2	1	1	1	5	?	WBGene00044325	C33H5.19	CEOP4252
TSPOP56	2	2	2	2	2,2	?	WBGene00013176;WBGene00020215	Y53F4B.39a;T04G9.4	CEOP2660;CEOPX147
TSPOP57	5	5	3	3	2,2,2	?	WBGene00000764;WBGene00021715;WBGene00018723;WBGene00004482;WBGene00001808	T03F1.2;Y49F6B.2;F53A3.7;C16A3.9;T10G3.6a	CEOP1124;CEOP2108;CEOP3845;NA;NA
TSPOP58	2	2	0	0		?	WBGene00013198;WBGene00006760	Y54E5A.2;H14N18.1b	NA;NA
TSPOP59	2	2	0	0		?	WBGene00023409;WBGene00022173	C27A12.10;Y71H2AM.8	NA;NA
TSPOP6	2	2	2	1	3	identical	WBGene00008006;WBGene00008008	C38D4.5a;C38D4.9	CEOP3220;CEOP3220
TSPOP60	2	2	1	1	2	1,NA	WBGene00007588;WBGene00020365	C14C10.5b;T08G2.2	CEOP5574;NA
TSPOP61	2	2	2	1	3	reversed	WBGene00011123;WBGene00011122	R07H5.3c;R07H5.2a	CEOP4424;CEOP4424
TSPOP62	2	2	0	0		?	WBGene00006696;WBGene00003062	Y39B6A.19a;K09H9.6	NA;NA
TSPOP64	2	2	0	0		?	WBGene00022172;WBGene00003008	Y71H2AM.7;Y54G2A.1	NA;NA
TSPOP65	3	3	2	2	5,6	?	WBGene00013678;WBGene00044310;WBGene00020471	Y105E8A.20b;H20J04.9;T13B5.3	CEOP1736;CEOP2124;NA
TSPOP66	2	1	0	0		?	WBGene00020437	T12A2.2	NA
TSPOP67	3	3	2	2	2,4	?	WBGene00015159;WBGene00016392;WBGene00043705	B0361.5b;C34B2.7;Y55F3AM.7a	CEOP3833;CEOP1636;NA
TSPOP68	2	2	2	1	2	identical	WBGene00004759;WBGene00008452	F45D3.5;E02A10.1	CEOP5356;CEOP5356
TSPOP69	2	1	0	0		?	WBGene00018547	F47C12.2	NA
TSPOP7	2	1	0	0		?	WBGene00004490	F37C12.11	NA
TSPOP70	2	2	0	0		?	WBGene00013477;WBGene00017268	Y69E1A.5;F08F8.2	NA;NA
TSPOP71	2	2	1	1	2	1,NA	WBGene00001366;WBGene00004276	C33D9.1c;K09A9.2	CEOP4610;NA
TSPOP72	2	1	0	0		?	WBGene00008746	F13E6.2	NA
TSPOP73	2	1	0	0		?	WBGene00006368	C54H2.1a	NA
TSPOP74	2	2	1	1	8	1,NA	WBGene00012996;WBGene00006512	Y48C3A.16;F18E2.2	CEOP2606;NA
TSPOP75	2	2	1	1	2	1,NA	WBGene00002986;WBGene00007007	C07H6.1;C44C8.6	CEOP3849;NA
TSPOP76	2	2	0	0		?	WBGene00000520;WBGene00014086	R07E5.8a;ZK809.3	NA;NA
TSPOP77	2	1	0	0		?	WBGene00009882	F49C12.13	NA
TSPOP78	4	4	1	1	2	1,NA,NA,NA	WBGene00001590;WBGene00008586;WBGene00019898;WBGene00006853	C45G3.3;F08G12.2;R05G6.4;C47G2.2	CEOP1986;NA;NA;NA
TSPOP79	2	1	1	1	2	?	WBGene00004031	T13F2.3b	CEOP4624
TSPOP8	2	2	1	1	3	1,NA	WBGene00004326;WBGene00012917	T20G5.11;Y46G5A.29	CEOP3660;NA
TSPOP80	2	1	1	1	2	?	WBGene00013144	Y53C12B.2	CEOP2452
TSPOP81	2	2	0	0		?	WBGene00012626;WBGene00007022	Y38H6C.14;ZK970.3	NA;NA
TSPOP82	2	2	1	1	2	1,NA	WBGene00044077;WBGene00045237	T18H9.7a;F39H2.5	CEOP5220;NA
TSPOP83	2	1	0	0		?	WBGene00004077	W10C8.2	NA
TSPOP84	2	1	0	0		?	WBGene00006452;WBGene00006452	R148.6;R148.6	NA;NA
TSPOP85	3	3	0	0		?	WBGene00004979;WBGene00002162;WBGene00021281	F42G8.11;F42G8.12;Y24D9A.1a	NA;NA;NA
TSPOP86	2	2	2	2	4,3	?	WBGene00011634;WBGene00013406	T09A5.5;Y63D3A.7	CEOP2312;CEOP1731
TSPOP87	3	2	0	0		?	WBGene00010812;WBGene00011887	M01F1.6;T21B10.5a	NA;NA
TSPOP88	2	2	1	1	3	1,NA	WBGene00013587;WBGene00004188	Y80D3A.9;W07E6.4	CEOP5476;NA
TSPOP89	2	2	2	2	2,2	?	WBGene00000962;WBGene00000181	T21E12.4b;F01G4.2a	CEOP1994;CEOP4412
TSPOP9	2	2	1	1	2	1,NA	WBGene00003389;WBGene00020562	K03H1.2;T19C3.4	CEOP3642;NA
TSPOP90	2	1	0	0		?	WBGene00012814	Y43F8B.3b	NA
TSPOP91	2	2	0	0		?	WBGene00012814;WBGene00007938	Y43F8B.3h;C34F6.1	NA;NA
TSPOP92	2	1	0	0		?	WBGene00018468	F45E4.3e	NA
TSPOP93	2	2	1	1	3	1,NA	WBGene00010044;WBGene00021807	F54C9.9;Y53G8AM.7	CEOP2368;NA
TSPOP94	2	1	1	1	2	?	WBGene00002497	F52H3.1	CEOP2696
TSPOP95	2	2	1	1	8	1,NA	WBGene00138717;WBGene00003009	F52C12.6a;K10B2.1d	CEOP4052;NA
TSPOP96	2	2	1	1	2	1,NA	WBGene00004136;WBGene00012666	K11D12.2;Y39B6A.3a	CEOP5564;NA
TSPOP97	2	2	0	0		?	WBGene00008480;WBGene00014243	E04D5.1a;ZK1251.9a	NA;NA
TSPOP98	2	2	2	2	2,2	?	WBGene00001547;WBGene00022379	T03D8.5c;Y94H6A.7	CEOP5581;CEOP4068
TSPOP99	2	2	1	1	2	1,NA	WBGene00012037;WBGene00004403	T26E3.4;Y116A8C.16f	CEOP1672;NA

## Sheet: BR10u
T. spiralis operon	Genes	Homologous C. elegans genes	Homologous C. elegans operonic genes	C. elegans operons	C. elegans operon sizes	Synteny	C. elegans gene IDs	C. elegans gene names	C. elegans operon IDs
TSPOP1	2	1	1	1	8	?	WBGene00021655	Y48A5A.1	CEOP4052
TSPOP10	2	2	2	2	2,4	?	WBGene00006701;WBGene00008664	C35B1.1;F10G8.6	CEOP4112;CEOP1584
TSPOP100	2	2	2	2	6,6	?	WBGene00006489;WBGene00019163	ZK856.9;H06H21.6	CEOP5248;CEOP4152
TSPOP101	2	2	2	1	3	identical	WBGene00004432;WBGene00017121	E04A4.8;E04A4.7	CEOP4148;CEOP4148
TSPOP102	2	1	1	1	2	?	WBGene00010304	F59A2.4a	CEOP3108
TSPOP103	2	2	2	2	6,2	?	WBGene00019503;WBGene00002891	K07H8.1;C56G2.6a	CEOP4280;CEOP3870
TSPOP104	2	2	1	1	2	1,NA	WBGene00001983;WBGene00009131	E04A4.4b;F25H8.1b	CEOP4144;NA
TSPOP105	2	1	0	0		?	WBGene00044637	Y47D7A.16a	NA
TSPOP106	2	2	2	2	3,3	?	WBGene00007020;WBGene00007387	Y104H12D.1a;C06H2.3a	CEOP4049;CEOP5276
TSPOP107	2	2	0	0		?	WBGene00010134;WBGene00014095	F55H12.3;ZK829.4	NA;NA
TSPOP108	2	2	0	0		?	WBGene00000170;WBGene00016844	C01G6.1b;C50F7.4	NA;NA
TSPOP109	2	2	0	0		?	WBGene00008281;WBGene00013455	C53D6.4b;Y67A10A.6c	NA;NA
TSPOP11	2	2	2	2	3,2	?	WBGene00012966;WBGene00022793	Y48A6B.5;ZK686.3	CEOP3712;CEOP3452
TSPOP110	2	2	0	0		?	WBGene00001007;WBGene00003963	C39E9.14a;C07A12.4a	NA;NA
TSPOP111	2	2	2	2	2,4	?	WBGene00017928;WBGene00022456	F29C4.6;Y110A7A.6b	CEOP4004;CEOP1220
TSPOP112	2	2	0	0		?	WBGene00022232;WBGene00010741	Y73B6BL.3;K10D6.1	NA;NA
TSPOP113	2	1	0	0		?	WBGene00001169;WBGene00001169	R03G5.1a;R03G5.1d	NA;NA
TSPOP114	2	2	1	1	3	1,NA	WBGene00013378;WBGene00019899	Y62E10A.10;R05G6.5	CEOP4544;NA
TSPOP115	2	2	0	0		?	WBGene00020517;WBGene00010722	T15B7.2;K09E4.4	NA;NA
TSPOP116	2	2	2	2	4,3	?	WBGene00000761;WBGene00007111	C24A11.9;B0035.12	CEOP1248;CEOP4440
TSPOP117	2	2	0	0		?	WBGene00007880;WBGene00044362	C33A12.1;F42G2.7a	NA;NA
TSPOP118	2	2	2	2	2,2	?	WBGene00003407;WBGene00009829	F57C12.5c;F47G9.1	CEOPX154;CEOP5522
TSPOP119	2	1	0	0		?	WBGene00022861	ZK1193.5e	NA
TSPOP12	2	2	2	1	6	identical	WBGene00006736;WBGene00020422	T10F2.3;T10F2.2	CEOP3260;CEOP3260
TSPOP120	2	2	1	1	2	1,NA	WBGene00016374;WBGene00002140	C33H5.7;C18H7.2b	CEOP4248;NA
TSPOP121	2	2	2	2	1,4	?	WBGene00022434;WBGene00006724	Y108G3AL.2;C08B11.7	CEOP5006;CEOP2328
TSPOP122	2	2	2	2	3,3	?	WBGene00022121;WBGene00007645	Y71F9AM.4a;C17E4.6	CEOP1076;CEOP1544
TSPOP123	2	2	0	0		?	WBGene00011436;WBGene00006772	T04F3.1a;C50C3.9c	NA;NA
TSPOP124	2	2	2	1	3	reversed	WBGene00013239;WBGene00003594	Y56A3A.22;Y56A3A.13	CEOP3744;CEOP3744
TSPOP125	2	2	2	2	3,2	?	WBGene00022381;WBGene00022380	Y94H6A.9a;Y94H6A.8	CEOP4665;CEOP4068
TSPOP126	2	2	1	1	2	1,NA	WBGene00011451;WBGene00017534	T04H1.5;F17A9.2	CEOP5336;NA
TSPOP127	2	2	0	0		?	WBGene00017037;WBGene00017765	D1069.3b;F25B4.1	NA;NA
TSPOP128	2	2	1	1	3	1,NA	WBGene00044329;WBGene00018281	F11A10.8;F41D9.1	CEOP4490;NA
TSPOP129	2	2	1	1	2	1,NA	WBGene00004494;WBGene00022416	K02B2.5;Y102A11A.6	CEOP4611;NA
TSPOP13	2	2	2	2	2,3	?	WBGene00011144;WBGene00021133	R08D7.4b;W10D9.5a	CEOP3560;CEOP2686
TSPOP130	2	2	2	2	6,2	?	WBGene00020109;WBGene00022471	R151.6;Y119C1B.5	CEOP3424;CEOP1947
TSPOP131	2	2	2	1	5	identical	WBGene00009648;WBGene00023422	F43C1.3;F43C1.6	CEOP3164;CEOP3164
TSPOP132	2	2	2	2	2,3	?	WBGene00008769;WBGene00003162	F13G3.11;F20H11.3	CEOP1392;CEOP3392
TSPOP133	2	2	2	1	3	identical	WBGene00006768;WBGene00014027	ZK637.8f;ZK637.9b	CEOP3556;CEOP3556
TSPOP134	2	1	1	1	3	?	WBGene00006540	F58A4.8	CEOP3608
TSPOP135	2	1	0	0		?	WBGene00001281	F10B5.6	NA
TSPOP136	2	2	0	0		?	WBGene00008345;WBGene00219217	C56A3.6c;C08F8.15	NA;NA
TSPOP137	2	1	1	1	2	?	WBGene00002002	K08E7.2	CEOP4520
TSPOP138	2	2	1	1	3	1,NA	WBGene00008684;WBGene00004228	F11A10.3a;R09H10.4	CEOP4490;NA
TSPOP139	3	2	1	1	7	1,NA	WBGene00009735;WBGene00022801	F45G2.9;ZK688.6a	CEOP3792;NA
TSPOP14	3	3	1	1	2	1,NA,NA	WBGene00011144;WBGene00010925;WBGene00006727	R08D7.4b;M153.2;F25B5.4a	CEOP3560;NA;NA
TSPOP140	2	2	0	0		?	WBGene00006620;WBGene00002217	C07G1.1;F56E3.3c	NA;NA
TSPOP141	2	1	1	1	2	?	WBGene00000247	T19E7.3a	CEOP4172
TSPOP142	2	2	1	1	2	1,NA	WBGene00017734;WBGene00020216	F23C8.5a;T04G9.5	CEOP1044;NA
TSPOP143	2	2	2	2	2,3	?	WBGene00004759;WBGene00015207	F45D3.5;B0495.8a	CEOP5356;CEOP2308
TSPOP144	2	2	1	1	2	1,NA	WBGene00004430;WBGene00019492	Y45F10D.12;K07E3.4b	CEOP4560;NA
TSPOP145	2	2	1	1	3	1,NA	WBGene00015487;WBGene00003047	C05D11.10;T03F6.5	CEOP3372;NA
TSPOP146	2	2	0	0		?	WBGene00001793;WBGene00012600	Y46G5A.31;Y38E10A.22a	NA;NA
TSPOP147	2	2	0	0		?	WBGene00018867;WBGene00022785	F55A12.10;ZK652.6a	NA;NA
TSPOP148	2	2	0	0		?	WBGene00020276;WBGene00003802	T05H4.15c;Y56A3A.17	NA;NA
TSPOP149	2	2	1	1	4	1,NA	WBGene00004095;WBGene00003975	F52C9.8f;T28D6.9	CEOP3284;NA
TSPOP15	2	2	2	2	2,1	?	WBGene00013317;WBGene00302986	Y57G11C.22a;Y37E11AM.4	CEOP4661;CEOP5604
TSPOP150	2	2	1	1	2	1,NA	WBGene00009341;WBGene00012258	F32H2.4;W04G3.5a	CEOP1520;NA
TSPOP151	2	2	0	0		?	WBGene00008749;WBGene00022798	F13E6.5;ZK688.3	NA;NA
TSPOP152	2	2	1	1	2	1,NA	WBGene00018409;WBGene00001579	F44B9.8;F56A11.1	CEOP3472;NA
TSPOP154	2	1	1	1	2	?	WBGene00021021	W04B5.4	CEOP3076
TSPOP155	2	2	0	0		?	WBGene00019498;WBGene00018208	K07E8.7a;F39G3.3	NA;NA
TSPOP156	2	1	0	0		?	WBGene00016400	C34D4.4	NA
TSPOP157	2	2	1	1	2	1,NA	WBGene00002185;WBGene00002005	T27E9.4a;F26D10.3	CEOP3800;NA
TSPOP158	2	2	1	1	6	1,NA	WBGene00020636;WBGene00022664	T20H4.5;ZK121.2	CEOP3424;NA
TSPOP159	2	2	1	1	3	1,NA	WBGene00017981;WBGene00020687	F32D1.1a;T22D1.10	CEOP5052;NA
TSPOP160	2	1	0	0		?	WBGene00003020	C32F10.2	NA
TSPOP161	2	2	1	1	3	1,NA	WBGene00010230;WBGene00019082	F58A4.9;F59A3.9	CEOP3608;NA
TSPOP162	2	2	1	1	3	1,NA	WBGene00010479;WBGene00010485	K01G5.8a;K01H12.2	CEOP3700;NA
TSPOP163	3	3	1	1	3	1,NA,NA	WBGene00016990;WBGene00006786;WBGene00010283	CD4.4;Y60A3A.1;F58G11.6	CEOP5076;NA;NA
TSPOP164	2	2	0	0		?	WBGene00010283;WBGene00006786	F58G11.6;Y60A3A.1	NA;NA
TSPOP165	2	2	1	1	2	1,NA	WBGene00022599;WBGene00020088	ZC395.10;R119.2	CEOP3276;NA
TSPOP166	2	1	0	0		?	WBGene00007904	C33G3.4	NA
TSPOP167	2	2	1	1	3	1,NA	WBGene00012645;WBGene00019199	Y39A1A.6;H14E04.2b	CEOP3688;NA
TSPOP168	2	2	1	1	2	1,NA	WBGene00009284;WBGene00002071	F31C3.2b;T04G9.3	CEOP1965;NA
TSPOP169	2	2	1	1	2	1,NA	WBGene00017547;WBGene00004762	F18A1.6b;F35G12.3a	CEOP2668;NA
TSPOP17	2	2	1	1	3	1,NA	WBGene00011773;WBGene00011775	T14G10.3;T14G10.5d	CEOP4619;NA
TSPOP170	2	2	0	0		?	WBGene00016311;WBGene00001329	C32D5.3;T04C10.2a	NA;NA
TSPOP171	3	3	1	1	2	1,NA,NA	WBGene00006840;WBGene00002008;WBGene00005674	R05D3.7;F43E2.8a;Y45F10B.6	CEOP3512;NA;NA
TSPOP172	2	1	1	1	2	?	WBGene00015133	B0303.15	CEOP3538
TSPOP173	2	2	0	0		?	WBGene00020397;WBGene00020160	T10B11.1;T02C5.3b	NA;NA
TSPOP174	2	2	0	0		?	WBGene00021074;WBGene00002179	W07E6.2a;T22C1.7	NA;NA
TSPOP175	2	2	1	1	2	1,NA	WBGene00013209;WBGene00019227	Y54G9A.6;H22K11.4a	CEOP2618;NA
TSPOP176	2	2	1	1	3	1,NA	WBGene00016754;WBGene00015168	C48E7.11;B0403.4	CEOP1316;NA
TSPOP177	2	2	1	1	2	1,NA	WBGene00006729;WBGene00006816	K07B1.3;F54B11.3a	CEOP5224;NA
TSPOP178	2	2	2	1	3	reversed	WBGene00023450;WBGene00011730	T12D8.10;T12D8.2	CEOP3818;CEOP3818
TSPOP179	2	2	1	1	2	1,NA	WBGene00022697;WBGene00009288	ZK353.1a;F31C3.6a	CEOP3522;NA
TSPOP18	2	1	1	1	6	?	WBGene00009771	F46B6.6a	CEOP5236
TSPOP180	2	2	1	1	2	1,NA	WBGene00012768;WBGene00006634	Y41E3.10b;F33C8.3	CEOP4685;NA
TSPOP181	2	1	0	0		?	WBGene00010488;WBGene00010488	K02A11.3;K02A11.3	NA;NA
TSPOP182	2	2	2	2	3,2	?	WBGene00010325;WBGene00021844	F59C6.4;Y54E10BR.5	CEOP1616;CEOP1924
TSPOP183	2	2	2	2	3,4	?	WBGene00022188;WBGene00010615	Y71H2AR.1;K07A1.9f	CEOP3086;CEOP1552
TSPOP184	2	2	0	0		?	WBGene00002203;WBGene00006747	F46F2.2e;R07D5.1j	NA;NA
TSPOP185	2	1	2	1	2	1,1	WBGene00013803;WBGene00013803	Y116A8C.26b;Y116A8C.26a	CEOP4632;CEOP4632
TSPOP186	2	2	1	1	4	1,NA	WBGene00008667;WBGene00007969	F10G8.9b;C36A4.9b	CEOP1584;NA
TSPOP187	2	1	0	0		?	WBGene00010909	M88.7	NA
TSPOP188	2	2	0	0		?	WBGene00006780;WBGene00002977	B0350.2e;Y105E8A.7b	NA;NA
TSPOP189	2	2	1	1	2	1,NA	WBGene00011631;WBGene00012144	T08G11.4b;T28H10.3	CEOP1508;NA
TSPOP19	2	2	2	1	5	identical	WBGene00022852;WBGene00195239	ZK1127.5;ZK1127.13	CEOP2280;CEOP2280
TSPOP190	2	2	1	1	2	1,NA	WBGene00020391;WBGene00022855	T10B5.5b;ZK1127.9b	CEOP5560;NA
TSPOP191	2	2	2	2	2,3	?	WBGene00011274;WBGene00007021	R53.5;C24H11.6	CEOP2734;CEOP3831
TSPOP192	2	2	0	0		?	WBGene00004180;WBGene00000875	F58A4.4a;K08E3.6	NA;NA
TSPOP193	2	2	1	1	4	1,NA	WBGene00007617;WBGene00016015	C15H11.9;C23G10.8	CEOP5416;NA
TSPOP194	2	1	0	0		?	WBGene00017758	F23H11.2	NA
TSPOP195	2	2	2	1	2	reversed	WBGene00016249;WBGene00004460	C30C11.1;C30C11.2	CEOP3528;CEOP3528
TSPOP196	2	2	1	1	3	1,NA	WBGene00018131;WBGene00021738	F37A4.1;Y50D4A.4a	CEOP3400;NA
TSPOP197	2	2	0	0		?	WBGene00010403;WBGene00016469	H19J13.1;C36B7.6	NA;NA
TSPOP198	2	1	1	1	2	?	WBGene00015160	B0361.6	CEOP3833
TSPOP199	2	2	1	1	2	1,NA	WBGene00004681;WBGene00006804	F52G2.2a;Y37D8A.13	CEOP4556;NA
TSPOP2	2	2	1	1	4	1,NA	WBGene00012641;WBGene00018793	Y39A1A.1c;F54C4.1	CEOP3684;NA
TSPOP20	2	2	0	0		?	WBGene00009226;WBGene00015926	F28G4.1;C17H11.6b	NA;NA
TSPOP200	2	1	0	0		?	WBGene00008882	F16B12.6	NA
TSPOP201	2	2	1	1	2	1,NA	WBGene00000536;WBGene00017010	ZC395.2;D1007.15a	CEOP3280;NA
TSPOP202	2	2	1	1	4	1,NA	WBGene00015809;WBGene00021815	C16A3.4;Y53G8AR.8	CEOP3364;NA
TSPOP203	2	2	2	2	2,2	?	WBGene00014218;WBGene00022192	ZK1098.1a;Y71H2B.2	CEOP3596;CEOP3853
TSPOP204	2	2	1	1	2	1,NA	WBGene00013237;WBGene00016508	Y56A3A.19;C37H5.5	CEOP3738;NA
TSPOP205	2	2	1	1	2	1,NA	WBGene00010757;WBGene00016503	K10G9.3b;C37C3.11	CEOP3890;NA
TSPOP206	3	3	2	1	2	2,1,NA	WBGene00010333;WBGene00003882;WBGene00007186	F59E10.3;F59E10.1;B0464.6	CEOP2508;CEOP2508;NA
TSPOP207	3	3	2	2	3,2	?	WBGene00019301;WBGene00021311;WBGene00003593	K02D10.1b;Y32H12A.2a;F42A10.2c	CEOP3540;CEOP3292;NA
TSPOP208	2	2	1	1	5	1,NA	WBGene00010809;WBGene00004255	M01F1.3;T20G5.5	CEOP3124;NA
TSPOP209	2	1	0	0		?	WBGene00000532	C07H4.2	NA
TSPOP21	2	2	2	2	2,3	?	WBGene00006728;WBGene00022803	ZK1010.1;ZK688.9	CEOP3768;CEOP3462
TSPOP210	2	2	2	2	2,2	?	WBGene00015173;WBGene00015648	B0412.3a;C09F5.2a	CEOP3036;CEOP3859
TSPOP211	2	2	1	1	3	1,NA	WBGene00010476;WBGene00003033	K01G5.1;F34D10.5	CEOP3701;NA
TSPOP212	4	4	3	2	5,2	?	WBGene00001661;WBGene00001660;WBGene00006755;WBGene00020443	C34E10.2;C34E10.3;ZK1098.10a;T12A2.15a	CEOP3272;CEOP3272;CEOP3830;NA
TSPOP213	2	2	1	1	3	1,NA	WBGene00006515;WBGene00015104	C05D11.3;B0280.9	CEOP3376;NA
TSPOP214	3	3	2	2	2,3	?	WBGene00022166;WBGene00022167;WBGene00006484	Y71H2AM.1;Y71H2AM.2;F08A8.6	CEOP5632;CEOP3086;NA
TSPOP215	2	2	1	1	2	1,NA	WBGene00020268;WBGene00002079	T05H4.5;Y48G1A.5a	CEOP5112;NA
TSPOP216	2	2	1	1	2	1,NA	WBGene00020268;WBGene00002079	T05H4.5;Y48G1A.5a	CEOP5112;NA
TSPOP217	2	2	1	1	2	1,NA	WBGene00012187;WBGene00001166	W01G7.3;ZK328.2	CEOP2624;NA
TSPOP218	2	2	1	1	2	1,NA	WBGene00007912;WBGene00017963	C34B7.2;F31F4.17	CEOP1464;NA
TSPOP219	2	2	1	1	3	1,NA	WBGene00022402;WBGene00006780	Y97E10AR.7;B0350.2h	CEOP5172;NA
TSPOP22	2	2	2	2	2,3	?	WBGene00003583;WBGene00007101	EEED8.8;B0024.11	CEOP2743;CEOP5252
TSPOP220	2	2	1	1	2	1,NA	WBGene00022576;WBGene00009966	ZC250.2;F53B7.3	CEOP5084;NA
TSPOP221	2	2	1	1	2	1,NA	WBGene00010279;WBGene00000433	F58G11.1b;ZK265.4a	CEOP5398;NA
TSPOP222	2	2	1	1	2	1,NA	WBGene00004497;WBGene00020835	Y41D4B.5;T27A1.3b	CEOP4640;NA
TSPOP223	2	2	2	2	2,3	?	WBGene00021350;WBGene00019460	Y37E3.8a;K06H7.9	CEOP1032;CEOP3480
TSPOP224	2	2	2	2	3,3	?	WBGene00004479;WBGene00003059	D1007.6;C48E7.3	CEOP1184;CEOP1316
TSPOP225	2	1	0	0		?	WBGene00003417	Y41C4A.14	NA
TSPOP226	2	2	2	2	2,2	?	WBGene00001618;WBGene00007927	C43H6.9c;C34C12.8	CEOPX032;CEOP3120
TSPOP227	2	2	1	1	3	1,NA	WBGene00016754;WBGene00014224	C48E7.11;ZK1098.7	CEOP1316;NA
TSPOP228	2	1	0	0		?	WBGene00007972	C36B1.5	NA
TSPOP229	2	2	1	1	2	1,NA	WBGene00021363;WBGene00012550	Y37E11AL.8;Y37D8A.10	CEOP4653;NA
TSPOP23	2	2	0	0		?	WBGene00013400;WBGene00011071	Y62H9A.12;R06F6.8b	NA;NA
TSPOP230	2	2	0	0		?	WBGene00018872;WBGene00010496	F55C12.5a;K02B12.3	NA;NA
TSPOP231	2	2	2	2	4,1	?	WBGene00017293;WBGene00016427	F09E5.17;C34H4.5a	CEOP2168;CEOP4631
TSPOP232	2	2	0	0		?	WBGene00000377;WBGene00008860	T05C12.7;F15D4.3	NA;NA
TSPOP233	2	2	0	0		?	WBGene00013189;WBGene00006309	Y54E2A.4b;D1014.1	NA;NA
TSPOP234	2	2	0	0		?	WBGene00017178;WBGene00013702	F02E8.5;Y106G6D.6	NA;NA
TSPOP235	2	1	0	0		?	WBGene00007059	F08C6.3	NA
TSPOP236	2	2	0	0		?	WBGene00006856;WBGene00004377	C13B4.2;F49E7.1a	NA;NA
TSPOP237	2	2	1	1	2	1,NA	WBGene00020417;WBGene00008920	T10E9.7;F17C11.9a	CEOP1326;NA
TSPOP238	2	2	1	1	2	1,NA	WBGene00001151;WBGene00004488	F38H4.8a;T05F1.3	CEOP4660;NA
TSPOP239	2	2	2	2	3,2	?	WBGene00011722;WBGene00002363	T11G6.8a;F38H4.9	CEOP4396;CEOP4480
TSPOP24	2	2	0	0		?	WBGene00006619;WBGene00008029	ZK546.15;C39E9.5	NA;NA
TSPOP240	2	2	0	0		?	WBGene00018860;WBGene00018076	F55A4.8b;F35H12.4	NA;NA
TSPOP241	3	3	2	1	6	1,2,NA	WBGene00013804;WBGene00013807;WBGene00010386	Y116A8C.27a;Y116A8C.30a;H12D21.10a	CEOP4596;CEOP4596;NA
TSPOP242	2	2	1	1	2	1,NA	WBGene00013236;WBGene00000800	Y56A3A.18;Y23H5A.7c	CEOP3740;NA
TSPOP243	2	2	1	1	2	1,NA	WBGene00017919;WBGene00016611	F29B9.1;C43G2.2b	CEOP4136;NA
TSPOP244	2	2	1	1	4	1,NA	WBGene00006931;WBGene00000302	T20D3.7b;C56A3.7c	CEOP4328;NA
TSPOP245	2	2	1	1	2	1,NA	WBGene00022056;WBGene00015913	Y67D2.6;C17F4.7	CEOP3860;NA
TSPOP246	2	2	1	1	3	1,NA	WBGene00009992;WBGene00000478	F53F4.10;F27E11.3	CEOP5392;NA
TSPOP247	2	2	1	1	2	1,NA	WBGene00011017;WBGene00018181	R04F11.5;F38E1.9	CEOP5344;NA
TSPOP248	2	2	0	0		?	WBGene00013093;WBGene00021292	Y51H1A.2e;Y25C1A.5	NA;NA
TSPOP249	2	2	1	1	2	1,NA	WBGene00013789;WBGene00002163	Y116A8C.9a;C54D1.3c	CEOP4592;NA
TSPOP25	2	2	0	0		?	WBGene00021920;WBGene00021930	Y55F3AM.1;Y55F3AM.13	NA;NA
TSPOP250	2	2	0	0		?	WBGene00009145;WBGene00003411	F26A3.7;F14F4.3	NA;NA
TSPOP251	3	3	1	1	2	1,NA,NA	WBGene00022296;WBGene00019953;WBGene00018135	Y76B12C.2;R08C7.10b;F37A4.5	CEOP4056;NA;NA
TSPOP252	2	2	1	1	2	1,NA	WBGene00003582;WBGene00008430	F52G2.1c;D2085.5b	CEOP4556;NA
TSPOP253	2	1	0	0		?	WBGene00017241	F08C6.2b	NA
TSPOP254	2	2	2	1	2	reversed	WBGene00007114;WBGene00007113	B0035.16;B0035.15	CEOP4428;CEOP4428
TSPOP255	2	2	1	1	3	1,NA	WBGene00013434;WBGene00009211	Y66D12A.8a;F28D1.1	CEOP3723;NA
TSPOP256	2	2	2	2	2,2	?	WBGene00010725;WBGene00007026	K09E9.2;F32H2.2a	CEOPX156;CEOP1512
TSPOP257	2	1	0	0		?	WBGene00019148	H03E18.1	NA
TSPOP258	2	2	0	0		?	WBGene00009793;WBGene00003562	F46F6.2a;F09G8.4	NA;NA
TSPOP259	2	2	1	1	2	1,NA	WBGene00003064;WBGene00009460	R10H10.1;F36A2.13	CEOP4376;NA
TSPOP26	2	2	1	1	3	1,NA	WBGene00001497;WBGene00019928	T08B2.9b;R07C3.12	CEOP1312;NA
TSPOP260	2	2	0	0		?	WBGene00006836;WBGene00007179	C47E8.7;B0457.4	NA;NA
TSPOP261	2	2	1	1	2	1,NA	WBGene00018088;WBGene00007155	F36D4.2;B0379.1a	CEOP5228;NA
TSPOP262	2	2	1	1	2	1,NA	WBGene00015513;WBGene00017814	C06A8.2;F26A10.2	CEOP2731;NA
TSPOP263	2	2	0	0		?	WBGene00000911;WBGene00044732	C10C5.6b;T03G11.10	NA;NA
TSPOP264	2	2	1	1	4	1,NA	WBGene00013218;WBGene00012830	Y54G11A.9;Y43F8C.8	CEOP2636;NA
TSPOP265	2	2	0	0		?	WBGene00004854;WBGene00007260	F40E10.4;C02C6.2a	NA;NA
TSPOP266	2	1	1	1	2	?	WBGene00021348	Y37E3.4	CEOP1028
TSPOP267	2	2	0	0		?	WBGene00016406;WBGene00002031	C34D10.1;Y34B4A.3	NA;NA
TSPOP268	2	2	1	1	2	1,NA	WBGene00011239;WBGene00009920	R11A8.5;F52B5.1a	CEOP4372;NA
TSPOP269	2	2	0	0		?	WBGene00012337;WBGene00010699	W07G4.3;K08H10.9	NA;NA
TSPOP27	2	2	0	0		?	WBGene00010375;WBGene00001328	H09F14.1c;K08C7.3f	NA;NA
TSPOP270	2	2	1	1	2	1,NA	WBGene00015579;WBGene00017085	C07H6.2;E01A2.2a	CEOP3849;NA
TSPOP271	2	2	1	1	4	1,NA	WBGene00018610;WBGene00017313	F48E8.3;F09G2.4	CEOP3304;NA
TSPOP272	3	3	2	2	2,2	?	WBGene00013332;WBGene00010037;WBGene00011175	Y57G11C.43;F54C8.4a;R09E10.5	CEOP4667;CEOP3580;NA
TSPOP273	2	2	2	2	3,3	?	WBGene00011067;WBGene00007760	R06F6.2;C27B7.2	CEOP2504;CEOP4312
TSPOP274	2	2	2	2	4,3	?	WBGene00000787;WBGene00017062	C41D11.8;D2063.3a	CEOP1180;CEOP5052
TSPOP275	2	1	0	0		?	WBGene00011834	T19B10.6	NA
TSPOP276	2	2	1	1	2	1,NA	WBGene00010231;WBGene00003394	F58B3.4;T07H6.2	CEOP4460;NA
TSPOP277	2	2	1	1	3	1,NA	WBGene00004205;WBGene00004446	F29B9.4c;T24B8.1a	CEOP4128;NA
TSPOP278	2	2	1	1	2	1,NA	WBGene00017360;WBGene00001650	F10E9.11;F25H8.3b	CEOP3504;NA
TSPOP279	3	3	3	2	3,2	?	WBGene00011334;WBGene00010993;WBGene00006369	T01E8.6;R03E1.2;R03E1.1	CEOP2472;CEOPX128;CEOPX128
TSPOP28	2	2	1	1	2	1,NA	WBGene00000940;WBGene00018700	Y113G7A.9a;F52E1.13f	CEOP5500;NA
TSPOP280	2	2	1	1	4	1,NA	WBGene00006446;WBGene00009200	F28F8.6;F28C1.1	CEOP5444;NA
TSPOP281	2	2	0	0		?	WBGene00010459;WBGene00044773	K01C8.7a;C08A9.10	NA;NA
TSPOP282	2	2	1	1	4	1,NA	WBGene00021377;WBGene00019825	Y37E11B.5;R02D3.8	CEOP4100;NA
TSPOP283	2	1	1	1	2	?	WBGene00022281	Y74C10AR.3a	CEOP1920
TSPOP284	2	1	1	1	2	?	WBGene00006626	F10G7.2	CEOP2132
TSPOP285	2	2	1	1	2	1,NA	WBGene00019333;WBGene00016331	K02F3.10;C32F10.1b	CEOP3040;NA
TSPOP286	2	2	1	1	2	1,NA	WBGene00004897;WBGene00000992	T10H9.4;F27D9.6	CEOP5128;NA
TSPOP288	3	3	2	1	5	1,2,NA	WBGene00019005;WBGene00019006;WBGene00012705	F57B10.8;F57B10.9;Y39C12A.3b	CEOP1332;CEOP1332;NA
TSPOP289	2	2	2	2	2,4	?	WBGene00017919;WBGene00017283	F29B9.1;F09E5.3	CEOP4136;CEOP2168
TSPOP29	2	1	0	0		?	WBGene00007197	B0513.5a	NA
TSPOP290	2	2	2	1	3	reversed	WBGene00016622;WBGene00016621	C43H8.2;C43H8.1	CEOP1628;CEOP1628
TSPOP291	2	1	1	1	2	?	WBGene00013344	Y59A8B.7	CEOP5464
TSPOP292	2	2	0	0		?	WBGene00001534;WBGene00006876	F52E1.4a;ZK1151.1b	NA;NA
TSPOP293	2	2	0	0		?	WBGene00022171;WBGene00002123	Y71H2AM.6a;C16E9.4b	NA;NA
TSPOP294	3	3	1	1	5	1,NA,NA	WBGene00015191;WBGene00022277;WBGene00009443	B0432.10;Y74C9A.3;F35G12.7	CEOP2020;NA;NA
TSPOP295	3	3	2	1	2	1,2,NA	WBGene00007189;WBGene00007194;WBGene00004790	B0491.1;B0491.7;F07H5.2	CEOP2532;CEOP2532;NA
TSPOP296	2	2	2	1	3	identical	WBGene00006919;WBGene00018512	F46F11.5;F46F11.9a	CEOP1264;CEOP1264
TSPOP297	2	2	0	0		?	WBGene00001209;WBGene00017066	C27D11.1;D2092.5	NA;NA
TSPOP298	2	2	2	1	3	reversed	WBGene00009286;WBGene00009285	F31C3.4;F31C3.3	CEOP1776;CEOP1776
TSPOP299	2	1	0	0		?	WBGene00016002	C18H9.3c	NA
TSPOP3	2	2	1	1	2	1,NA	WBGene00007528;WBGene00014215	C11H1.2;ZK1086.1b	CEOPX134;NA
TSPOP30	2	2	1	1	1	1,NA	WBGene00016592;WBGene00003084	C42C1.15;R160.7	CEOP4508;NA
TSPOP300	2	2	0	0		?	WBGene00017098;WBGene00015125	E02D9.1c;B0303.3	NA;NA
TSPOP301	2	2	1	1	3	1,NA	WBGene00000426;WBGene00004888	Y106G6E.5b;K12C11.2	CEOP1592;NA
TSPOP302	2	2	1	1	2	1,NA	WBGene00007009;WBGene00023407	Y65B4BR.4d;F56D1.6	CEOP1934;NA
TSPOP303	2	2	2	1	4	identical	WBGene00006958;WBGene00011058	R06C1.3a;R06C1.2	CEOP1660;CEOP1660
TSPOP304	2	2	1	1	2	1,NA	WBGene00001056;WBGene00016494	K02F2.1a;C37A2.8a	CEOP1999;NA
TSPOP305	2	2	2	2	4,3	?	WBGene00011975;WBGene00008133	T24B1.1;C47B2.7b	CEOP1416;CEOP1786
TSPOP306	3	3	2	2	2,2	?	WBGene00004117;WBGene00020441;WBGene00004478	F02E9.4b;T12A2.7;F40F8.10	CEOP1980;CEOP3360;NA
TSPOP307	2	2	1	1	2	1,NA	WBGene00003148;WBGene00022733	H21P03.1;ZK418.3	CEOP4444;NA
TSPOP308	2	2	1	1	2	1,NA	WBGene00021854;WBGene00012398	Y54F10AR.1;Y6E2A.4	CEOP3861;NA
TSPOP309	2	2	2	2	2,3	?	WBGene00011867;WBGene00003224	T20G5.1;C09G4.5	CEOP3858;CEOP4294
TSPOP31	2	2	1	1	2	1,NA	WBGene00022044;WBGene00006578	Y66H1A.2a;F25H2.1	CEOP4028;NA
TSPOP310	2	2	1	1	2	1,NA	WBGene00004680;WBGene00018213	C29H12.1;F39H12.2	CEOP2236;NA
TSPOP311	2	2	2	2	5,2	?	WBGene00001740;WBGene00021714	ZC395.6;Y49F6B.1	CEOP3272;CEOP2108
TSPOP312	2	2	1	1	2	1,NA	WBGene00015466;WBGene00008225	C05C8.9a;C50B8.3	CEOP5152;NA
TSPOP313	2	2	2	1	2	reversed	WBGene00019077;WBGene00019076	F59A3.4;F59A3.3	CEOP1256;CEOP1256
TSPOP314	2	2	0	0		?	WBGene00009920;WBGene00009099	F52B5.1a;F25B3.2	NA;NA
TSPOP315	2	2	1	1	3	1,NA	WBGene00015232;WBGene00004368	B0511.6;C32E8.7	CEOP1628;NA
TSPOP316	3	3	1	1	2	1,NA,NA	WBGene00003794;WBGene00000417;WBGene00010941	Y41D4B.19b;C48D1.2b;M176.2	CEOP4615;NA;NA
TSPOP317	2	2	2	1	3	reversed	WBGene00013670;WBGene00000158	Y105E8A.10c;Y105E8A.9	CEOP1904;CEOP1904
TSPOP318	2	2	1	1	2	1,NA	WBGene00009452;WBGene00003953	F36A2.2;F39H11.5	CEOP1504;NA
TSPOP319	2	1	0	0		?	WBGene00007705	C25A1.1	NA
TSPOP32	2	2	2	2	2,2	?	WBGene00018161;WBGene00001372	F38A5.2b;R09B3.1a	CEOP4184;CEOP1656
TSPOP320	2	2	0	0		?	WBGene00022154;WBGene00016331	Y71G12B.16;C32F10.1a	NA;NA
TSPOP321	2	2	1	1	3	1,NA	WBGene00011065;WBGene00010416	R06C7.6;H25P06.1	CEOP1380;NA
TSPOP322	2	1	1	1	4	?	WBGene00018149	F37C12.1	CEOP3416
TSPOP323	2	2	1	1	2	1,NA	WBGene00009563;WBGene00010730	F39H2.3;K10C3.2	CEOP1496;NA
TSPOP324	2	2	1	1	4	1,NA	WBGene00010437;WBGene00022199	JC8.5a;Y71H10A.1a	CEOP4536;NA
TSPOP325	2	2	0	0		?	WBGene00019673;WBGene00001037	K12C11.1a;T05C3.5	NA;NA
TSPOP326	2	2	1	1	2	1,NA	WBGene00004895;WBGene00021536	CC4.3;Y42H9AR.1	CEOP1682;NA
TSPOP327	2	2	1	1	1	1,NA	WBGene00020955;WBGene00044763	W02G9.5c;ZK688.12	CEOP5531;NA
TSPOP328	2	2	1	1	2	1,NA	WBGene00011272;WBGene00012735	R53.2;Y40B1A.4	CEOP2746;NA
TSPOP329	2	1	0	0		?	WBGene00009307	F32A11.1	NA
TSPOP33	2	2	2	1	2	identical	WBGene00003061;WBGene00022835	ZK973.10;ZK973.9	CEOP1176;CEOP1176
TSPOP330	2	2	0	0		?	WBGene00004807;WBGene00004809	F46A9.5;F44G3.6	NA;NA
TSPOP331	2	2	2	2	2,3	?	WBGene00013041;WBGene00010731	Y49E10.22;K10C3.4a	CEOP3893;CEOP1566
TSPOP332	2	2	0	0		?	WBGene00006062;WBGene00000792	F30A10.8;F11C7.4	NA;NA
TSPOP333	2	2	0	0		?	WBGene00008053;WBGene00021095	C41C4.8;W08F4.6	NA;NA
TSPOP334	2	2	0	0		?	WBGene00006807;WBGene00012353	C17D12.2b;W09C5.7a	NA;NA
TSPOP335	2	2	1	1	3	1,NA	WBGene00012964;WBGene00000776	Y48A6B.3;T03E6.7a	CEOP3712;NA
TSPOP336	2	2	2	1	3	reversed	WBGene00021683;WBGene00000812	Y48G1C.10a;Y48G1C.2a	CEOP1940;CEOP1940
TSPOP337	2	2	2	2	1,7	?	WBGene00008427;WBGene00000796	D2085.2;C14A4.4a	CEOP2376;CEOP2496
TSPOP338	2	2	0	0		?	WBGene00009626;WBGene00009233	F42A8.1;F28H6.4	NA;NA
TSPOP339	2	1	0	0		?	WBGene00001771	T28A11.11	NA
TSPOP34	2	2	2	2	2,2	?	WBGene00013920;WBGene00013231	ZC506.3;Y56A3A.11	CEOPX107;CEOP3736
TSPOP340	3	2	2	2	5,3	?	WBGene00016142;WBGene00009187	C26E6.6;F27D4.1	CEOP3244;CEOP1989
TSPOP341	2	2	1	1	2	1,NA	WBGene00017088;WBGene00013852	E01A2.6;ZC101.3	CEOP1892;NA
TSPOP342	2	1	0	0		?	WBGene00003928	ZK945.2	NA
TSPOP343	2	2	2	2	3,4	?	WBGene00009002;WBGene00001486	F21C3.3;F59G1.7	CEOP1384;CEOP2232
TSPOP344	2	1	1	1	2	?	WBGene00000970	C17G10.8	CEOP2196
TSPOP346	2	2	1	1	2	1,NA	WBGene00022453;WBGene00013902	Y110A2AR.3a;ZC455.1a	CEOP2076;NA
TSPOP347	2	2	0	0		?	WBGene00007302;WBGene00009217	C04F12.8;F28D1.8	NA;NA
TSPOP348	2	2	1	1	2	1,NA	WBGene00006833;WBGene00019491	F53F10.4a;K07E3.2	CEOP1116;NA
TSPOP349	2	1	1	1	5	?	WBGene00008458	E02H1.6	CEOP2436
TSPOP35	2	2	2	2	2,3	?	WBGene00001566;WBGene00021904	C28C12.9;Y55B1AL.2	CEOP4292;CEOP3828
TSPOP350	2	1	1	1	2	?	WBGene00007050	F18C5.3	CEOP2250
TSPOP351	2	1	0	0		?	WBGene00020068	R13F6.10	NA
TSPOP352	2	1	0	0		?	WBGene00009552	F39B1.1	NA
TSPOP353	2	2	2	2	4,2	?	WBGene00006946;WBGene00012714	C34E10.4b;Y39E4B.1	CEOP3268;CEOP3819
TSPOP354	2	2	0	0		?	WBGene00005897;WBGene00016674	F07G11.8;C45G9.2	NA;NA
TSPOP355	2	2	0	0		?	WBGene00000959;WBGene00000817	F46H6.2a;B0547.1	NA;NA
TSPOP356	2	1	0	0		?	WBGene00019627	K10D2.1a	NA
TSPOP357	2	2	2	2	2,4	?	WBGene00017286;WBGene00000202	F09E5.8;Y6D11A.1	CEOP2164;CEOP3044
TSPOP358	2	2	1	1	2	1,NA	WBGene00000184;WBGene00004298	Y116A8C.12;W06D4.6	CEOP4669;NA
TSPOP359	2	2	1	1	2	1,NA	WBGene00006708;WBGene00021883	Y54G2A.31;Y54G2A.18	CEOP4072;NA
TSPOP36	2	2	1	1	2	1,NA	WBGene00011776;WBGene00018777	T14G10.7;F53H1.3a	CEOP4356;NA
TSPOP360	2	1	0	0		?	WBGene00000162	W09G10.4a	NA
TSPOP361	2	2	0	0		?	WBGene00001946;WBGene00018193	Y49E10.6b;F39C12.1	NA;NA
TSPOP362	2	2	2	1	2	reversed	WBGene00012756;WBGene00001235	Y41C4A.9;Y41C4A.10	CEOP3728;CEOP3728
TSPOP363	2	2	0	0		?	WBGene00013109;WBGene00013111	Y51H4A.15;Y51H4A.17a	NA;NA
TSPOP364	2	2	1	1	5	1,NA	WBGene00021758;WBGene00003006	Y50D7A.10;Y71F9B.5c	CEOP3851;NA
TSPOP365	2	1	0	0		?	WBGene00010023	F54B8.9	NA
TSPOP366	2	2	2	2	3,3	?	WBGene00006997;WBGene00021208	ZK546.1d;Y18H1A.2a	CEOP2690;CEOP1014
TSPOP367	2	2	0	0		?	WBGene00002228;WBGene00012739	C06G3.2;Y40B1B.7	NA;NA
TSPOP369	2	2	2	2	2,5	?	WBGene00017286;WBGene00007201	F09E5.8;B0564.1a	CEOP2164;CEOP4532
TSPOP37	2	2	2	2	2,5	?	WBGene00014938;WBGene00016375	Y62E10A.11;C33H5.8	CEOP4548;CEOP4252
TSPOP371	1	1	0	0		?	WBGene00045500	T05E12.9	NA
TSPOP372	2	2	1	1	4	1,NA	WBGene00006946;WBGene00017922	C34E10.4b;F29B9.7	CEOP3268;NA
TSPOP373	1	1	1	1	5	?	WBGene00001823	ZC395.7	CEOP3272
TSPOP374	2	2	0	0		?	WBGene00011280;WBGene00015286	R74.6;C01B12.3	NA;NA
TSPOP375	2	1	1	1	4	?	WBGene00017889	F28B3.10	CEOP1208
TSPOP376	2	2	2	2	4,2	?	WBGene00006946;WBGene00012714	C34E10.4b;Y39E4B.1	CEOP3268;CEOP3819
TSPOP377	2	2	2	1	3	identical	WBGene00008006;WBGene00008008	C38D4.5b;C38D4.9	CEOP3220;CEOP3220
TSPOP378	1	1	0	0		?	WBGene00003412	F20B6.3	NA
TSPOP379	2	2	2	2	4,3	?	WBGene00000838;WBGene00022759	Y108G3AL.1b;ZK546.2b	CEOP5588;CEOP2690
TSPOP38	2	2	1	1	3	1,NA	WBGene00015793;WBGene00001371	C15C7.7;F26H11.5	CEOPX040;NA
TSPOP380	1	1	1	1	3	?	WBGene00010130	F55H2.2	CEOP3880
TSPOP381	2	2	2	2	2,2	?	WBGene00000940;WBGene00013997	Y113G7A.9a;ZK550.3	CEOP5500;CEOP4600
TSPOP382	2	2	2	2	6,3	?	WBGene00020110;WBGene00015353	R151.7b;C02F5.13	CEOP3424;CEOP3496
TSPOP39	5	5	4	4	2,3,4,2	?	WBGene00011941;WBGene00004424;WBGene00011860;WBGene00012730;WBGene00010033	T23B5.4a;JC8.3a;T20D3.8;Y39G8C.1;F54B11.10	CEOP4654;CEOP4535;CEOP4328;CEOP2724;NA
TSPOP4	3	3	2	2	3,2	?	WBGene00008364;WBGene00007752;WBGene00012927	D1046.3;C26H9A.2d;Y47D3A.14	CEOP4316;CEOP4654;NA
TSPOP40	2	2	1	1	4	1,NA	WBGene00007616;WBGene00007882	C15H11.8;C33A12.3a	CEOP5416;NA
TSPOP41	2	2	2	2	3,3	?	WBGene00021515;WBGene00019822	Y41D4B.12a;R02D3.4b	CEOP4047;CEOP4008
TSPOP42	2	2	0	0		?	WBGene00045242;WBGene00016913	C05B5.11;C54D1.5	NA;NA
TSPOP43	2	2	2	2	3,6	?	WBGene00013376;WBGene00015238	Y62E10A.6;B0511.13b	CEOP4540;CEOP1632
TSPOP44	2	2	2	2	3,2	?	WBGene00017999;WBGene00016740	F33D4.7;C48B6.2	CEOP4240;CEOP1356
TSPOP45	2	1	1	1	5	?	WBGene00044325	C33H5.19	CEOP4252
TSPOP46	2	2	2	2	2,2	?	WBGene00013176;WBGene00020215	Y53F4B.39a;T04G9.4	CEOP2660;CEOPX147
TSPOP47	5	5	3	3	2,2,2	?	WBGene00000764;WBGene00021715;WBGene00018723;WBGene00004482;WBGene00001808	T03F1.2;Y49F6B.2;F53A3.7;C16A3.9;T10G3.6a	CEOP1124;CEOP2108;CEOP3845;NA;NA
TSPOP48	2	2	0	0		?	WBGene00023409;WBGene00012259	C27A12.10;W04G3.6d	NA;NA
TSPOP49	2	2	1	1	2	1,NA	WBGene00007588;WBGene00020365	C14C10.5b;T08G2.2	CEOP5574;NA
TSPOP5	2	2	1	1	4	1,NA	WBGene00013462;WBGene00018740	Y67H2A.4d;F53B3.1	CEOP4538;NA
TSPOP50	2	2	2	1	3	identical	WBGene00011122;WBGene00011123	R07H5.2a;R07H5.3c	CEOP4424;CEOP4424
TSPOP51	2	2	0	0		?	WBGene00006696;WBGene00003062	Y39B6A.19a;K09H9.6	NA;NA
TSPOP53	2	2	0	0		?	WBGene00022172;WBGene00003008	Y71H2AM.7;Y54G2A.1	NA;NA
TSPOP54	2	2	1	1	5	1,NA	WBGene00013678;WBGene00020471	Y105E8A.20b;T13B5.3	CEOP1736;NA
TSPOP55	2	1	0	0		?	WBGene00020437	T12A2.2	NA
TSPOP56	2	2	1	1	4	1,NA	WBGene00016392;WBGene00043705	C34B2.7;Y55F3AM.7a	CEOP1636;NA
TSPOP57	2	2	2	1	2	reversed	WBGene00008452;WBGene00004759	E02A10.1;F45D3.5	CEOP5356;CEOP5356
TSPOP58	2	1	0	0		?	WBGene00018547	F47C12.2	NA
TSPOP59	2	2	0	0		?	WBGene00013477;WBGene00017268	Y69E1A.5;F08F8.2	NA;NA
TSPOP6	2	2	2	1	3	identical	WBGene00008006;WBGene00008008	C38D4.5a;C38D4.9	CEOP3220;CEOP3220
TSPOP60	2	2	1	1	2	1,NA	WBGene00001366;WBGene00004276	C33D9.1c;K09A9.2	CEOP4610;NA
TSPOP61	3	3	1	1	6	1,NA,NA	WBGene00020113;WBGene00006512;WBGene00006368	R151.10;F18E2.2;C54H2.1a	CEOP3424;NA;NA
TSPOP62	2	2	1	1	2	1,NA	WBGene00002986;WBGene00007007	C07H6.1;C44C8.6	CEOP3849;NA
TSPOP63	2	2	0	0		?	WBGene00014086;WBGene00000520	ZK809.3;R07E5.8a	NA;NA
TSPOP64	2	2	0	0		?	WBGene00003423;WBGene00009882	R10E9.1;F49C12.13	NA;NA
TSPOP65	4	4	1	1	2	1,NA,NA,NA	WBGene00001590;WBGene00006853;WBGene00019898;WBGene00008586	C45G3.3;C47G2.2;R05G6.4;F08G12.2	CEOP1986;NA;NA;NA
TSPOP66	2	1	1	1	2	?	WBGene00004031	T13F2.3b	CEOP4624
TSPOP67	2	1	1	1	2	?	WBGene00013144	Y53C12B.2	CEOP2452
TSPOP68	2	2	1	1	2	1,NA	WBGene00001590;WBGene00007022	C45G3.3;ZK970.3	CEOP1986;NA
TSPOP69	2	2	1	1	2	1,NA	WBGene00044077;WBGene00045237	T18H9.7a;F39H2.5	CEOP5220;NA
TSPOP7	2	2	0	0		?	WBGene00012978;WBGene00012917	Y48B6A.1;Y46G5A.29	NA;NA
TSPOP70	2	2	1	1	2	1,NA	WBGene00009127;WBGene00004077	F25H5.5a;W10C8.2	CEOP1540;NA
TSPOP71	2	2	0	0		?	WBGene00006452;WBGene00020114	R148.6;R153.1h	NA;NA
TSPOP72	2	2	2	2	4,3	?	WBGene00011634;WBGene00013406	T09A5.5;Y63D3A.7	CEOP2312;CEOP1731
TSPOP73	3	3	1	1	3	1,NA,NA	WBGene00010408;WBGene00002162;WBGene00004979	H19N07.4a;F42G8.12;F42G8.11	CEOP5272;NA;NA
TSPOP74	2	1	0	0		?	WBGene00010812	M01F1.6	NA
TSPOP75	2	2	1	1	3	1,NA	WBGene00013587;WBGene00004188	Y80D3A.9;W07E6.4	CEOP5476;NA
TSPOP76	2	2	2	2	2,2	?	WBGene00000962;WBGene00000181	T21E12.4b;F01G4.2a	CEOP1994;CEOP4412
TSPOP77	2	2	0	0		?	WBGene00012814;WBGene00007938	Y43F8B.3b;C34F6.1	NA;NA
TSPOP78	2	1	0	0		?	WBGene00018468	F45E4.3e	NA
TSPOP79	2	2	1	1	3	1,NA	WBGene00010044;WBGene00021807	F54C9.9;Y53G8AM.7	CEOP2368;NA
TSPOP8	2	2	1	1	2	1,NA	WBGene00003389;WBGene00020562	K03H1.2;T19C3.4	CEOP3642;NA
TSPOP80	2	1	1	1	2	?	WBGene00002497	F52H3.1	CEOP2696
TSPOP81	2	2	1	1	8	1,NA	WBGene00138717;WBGene00003009	F52C12.6a;K10B2.1d	CEOP4052;NA
TSPOP82	2	2	1	1	2	1,NA	WBGene00004136;WBGene00012666	K11D12.2;Y39B6A.3a	CEOP5564;NA
TSPOP83	2	2	1	1	2	1,NA	WBGene00022379;WBGene00014243	Y94H6A.7;ZK1251.9a	CEOP4068;NA
TSPOP84	2	2	1	1	2	1,NA	WBGene00012037;WBGene00004403	T26E3.4;Y116A8C.16f	CEOP1672;NA
TSPOP85	2	1	0	0		?	WBGene00018932	F56B3.8a	NA
TSPOP86	2	2	0	0		?	WBGene00011821;WBGene00020556	T18D3.3a;T19B4.1	NA;NA
TSPOP87	2	2	1	1	3	1,NA	WBGene00008684;WBGene00003733	F11A10.3a;F57C7.2b	CEOP4490;NA
TSPOP88	2	1	0	0		?	WBGene00007534	C12D8.1a	NA
TSPOP89	2	2	2	2	6,5	?	WBGene00012694;WBGene00021752	Y39B6A.36;Y50D7A.2	CEOP5480;CEOP3851
TSPOP9	2	2	1	1	2	1,NA	WBGene00007668;WBGene00012717	C18B12.6;Y39E4B.6b	CEOPX132;NA
TSPOP90	3	3	1	1	2	1,NA,NA	WBGene00010042;WBGene00006494;WBGene00004749	F54C9.6;H13N06.5;F57C7.3a	CEOP2364;NA;NA
TSPOP91	2	2	1	1	2	1,NA	WBGene00021956;WBGene00016442	Y57E12AL.1a;C35D10.5	CEOP5534;NA
TSPOP92	2	2	2	1	4	identical	WBGene00000818;WBGene00013464	Y67H2A.6b;Y67H2A.7a	CEOP4538;CEOP4538
TSPOP93	2	1	1	1	3	?	WBGene00044025	T01G1.4	CEOP4639
TSPOP94	2	2	0	0		?	WBGene00044631;WBGene00012916	F55A11.5;Y46G5A.28	NA;NA
TSPOP95	2	2	2	1	2	identical	WBGene00021421;WBGene00021423	Y38F2AR.3a;Y38F2AR.5b	CEOP4060;CEOP4060
TSPOP96	2	2	2	2	2,2	?	WBGene00006497;WBGene00021934	F10G7.1;Y55F3AR.3a	CEOP2132;CEOP4046
TSPOP97	2	2	2	2	2,4	?	WBGene00001635;WBGene00001860	Y45F10D.3b;F28B3.7a	CEOP4560;CEOP1208
TSPOP98	2	2	0	0		?	WBGene00016197;WBGene00017605	C28H8.6a;F19F10.9	NA;NA
TSPOP99	2	2	2	2	2,3	?	WBGene00009084;WBGene00006607	F23B12.7;F57B10.7	CEOP5420;CEOP1336

## Sheet: BR8c
T. spiralis operon	Genes	Homologous C. elegans genes	Homologous C. elegans operonic genes	C. elegans operons	C. elegans operon sizes	Synteny	C. elegans gene IDs	C. elegans gene names	C. elegans operon IDs
TSPOP1	2	1	1	1	8	?	WBGene00021655	Y48A5A.1	CEOP4052
TSPOP10	2	2	1	1	2	1,NA	WBGene00003389;WBGene00020562	K03H1.2;T19C3.4	CEOP3642;NA
TSPOP100	2	2	1	1	3	1,NA	WBGene00010044;WBGene00021807	F54C9.9;Y53G8AM.7	CEOP2368;NA
TSPOP101	2	1	1	1	2	?	WBGene00002497	F52H3.1	CEOP2696
TSPOP102	2	2	1	1	8	1,NA	WBGene00138717;WBGene00003009	F52C12.6a;K10B2.1d	CEOP4052;NA
TSPOP103	2	2	0	0		?	WBGene00012665;WBGene00013481	Y39B6A.2a;Y69H2.3e	NA;NA
TSPOP104	2	2	1	1	2	1,NA	WBGene00004136;WBGene00012666	K11D12.2;Y39B6A.3a	CEOP5564;NA
TSPOP105	2	2	0	0		?	WBGene00014243;WBGene00008480	ZK1251.9a;E04D5.1a	NA;NA
TSPOP106	2	2	2	2	2,2	?	WBGene00022379;WBGene00001547	Y94H6A.7;T03D8.5c	CEOP4068;CEOP5581
TSPOP107	2	2	1	1	2	1,NA	WBGene00012037;WBGene00004403	T26E3.4;Y116A8C.16f	CEOP1672;NA
TSPOP108	2	1	0	0		?	WBGene00018932	F56B3.8a	NA
TSPOP109	2	1	1	1	7	?	WBGene00003693	F44C8.4	CEOP5028
TSPOP11	2	2	1	1	2	1,NA	WBGene00007668;WBGene00012717	C18B12.6;Y39E4B.6b	CEOPX132;NA
TSPOP110	2	2	0	0		?	WBGene00020556;WBGene00011821	T19B4.1;T18D3.3a	NA;NA
TSPOP111	2	2	1	1	3	1,NA	WBGene00008684;WBGene00007697	F11A10.3a;C24F3.2	CEOP4490;NA
TSPOP112	2	1	0	0		?	WBGene00007534	C12D8.1c	NA
TSPOP113	2	2	2	2	6,5	?	WBGene00012694;WBGene00021752	Y39B6A.36;Y50D7A.2	CEOP5480;CEOP3851
TSPOP114	3	3	1	1	2	1,NA,NA	WBGene00010042;WBGene00004749;WBGene00006494	F54C9.6;F57C7.3a;H13N06.5	CEOP2364;NA;NA
TSPOP115	2	2	2	1	2	reversed	WBGene00021960;WBGene00021956	Y57E12AM.1;Y57E12AL.1a	CEOP5534;CEOP5534
TSPOP116	2	2	2	1	4	identical	WBGene00000818;WBGene00013464	Y67H2A.6b;Y67H2A.7a	CEOP4538;CEOP4538
TSPOP117	2	1	1	1	3	?	WBGene00044025	T01G1.4	CEOP4639
TSPOP118	2	2	0	0		?	WBGene00044631;WBGene00012916	F55A11.5;Y46G5A.28	NA;NA
TSPOP119	2	2	2	1	2	identical	WBGene00021421;WBGene00021423	Y38F2AR.3a;Y38F2AR.5b	CEOP4060;CEOP4060
TSPOP12	2	2	2	2	2,4	?	WBGene00006701;WBGene00008664	C35B1.1;F10G8.6	CEOP4112;CEOP1584
TSPOP120	2	2	0	0		?	WBGene00010356;WBGene00001555	H03A11.1;T04D3.4a	NA;NA
TSPOP121	2	2	2	2	2,2	?	WBGene00021934;WBGene00006497	Y55F3AR.3a;F10G7.1	CEOP4046;CEOP2132
TSPOP122	2	2	2	2	2,4	?	WBGene00001635;WBGene00001860	Y45F10D.3b;F28B3.7a	CEOP4560;CEOP1208
TSPOP123	2	2	1	1	4	1,NA	WBGene00012643;WBGene00017605	Y39A1A.3;F19F10.9	CEOP3684;NA
TSPOP124	2	1	1	1	3	?	WBGene00006607	F57B10.7	CEOP1336
TSPOP125	2	2	2	2	6,6	?	WBGene00006489;WBGene00019163	ZK856.9;H06H21.6	CEOP5248;CEOP4152
TSPOP126	2	2	2	1	3	identical	WBGene00004432;WBGene00017121	E04A4.8;E04A4.7	CEOP4148;CEOP4148
TSPOP127	2	1	1	1	2	?	WBGene00010304	F59A2.4a	CEOP3108
TSPOP128	2	2	1	1	2	1,NA	WBGene00002891;WBGene00010722	C56G2.6a;K09E4.4	CEOP3870;NA
TSPOP129	2	2	1	1	2	1,NA	WBGene00001983;WBGene00009131	E04A4.4b;F25H8.1b	CEOP4144;NA
TSPOP13	2	2	0	0		?	WBGene00017046;WBGene00002393	D2021.1a;Y65B4BR.2a	NA;NA
TSPOP130	2	1	0	0		?	WBGene00044637	Y47D7A.16a	NA
TSPOP131	2	2	0	0		?	WBGene00016935;WBGene00003153	C54G7.4;Y67D8C.10e	NA;NA
TSPOP132	2	2	2	2	3,3	?	WBGene00007387;WBGene00007020	C06H2.3a;Y104H12D.1a	CEOP5276;CEOP4049
TSPOP133	2	2	0	0		?	WBGene00010134;WBGene00014095	F55H12.3;ZK829.4	NA;NA
TSPOP134	3	2	0	0		?	WBGene00016844;WBGene00000170	C50F7.4;C01G6.1b	NA;NA
TSPOP135	2	1	1	1	2	?	WBGene00021888	Y54G2A.23	CEOP4072
TSPOP136	2	2	1	1	3	1,NA	WBGene00000996;WBGene00022233	F49E8.5;Y73B6BL.4	CEOP4228;NA
TSPOP137	2	2	0	0		?	WBGene00012887;WBGene00004371	Y45F10D.7;Y42H9B.2	NA;NA
TSPOP138	2	2	0	0		?	WBGene00008281;WBGene00013455	C53D6.4b;Y67A10A.6c	NA;NA
TSPOP139	2	2	2	2	2,2	?	WBGene00009006;WBGene00010557	F21D5.1;K04D7.2b	CEOP4300;CEOP4360
TSPOP14	3	3	3	2	2,3	?	WBGene00022793;WBGene00022794;WBGene00012966	ZK686.3;ZK686.4;Y48A6B.5	CEOP3452;CEOP3452;CEOP3712
TSPOP140	3	3	0	0		?	WBGene00001007;WBGene00008729;WBGene00003963	C39E9.14a;F13B12.1;C07A12.4a	NA;NA;NA
TSPOP141	2	2	1	1	2	1,NA	WBGene00017797;WBGene00000390	F25G6.2;R07G3.1	CEOP5204;NA
TSPOP142	2	2	2	2	4,2	?	WBGene00022456;WBGene00017928	Y110A7A.6b;F29C4.6	CEOP1220;CEOP4004
TSPOP143	2	2	0	0		?	WBGene00010741;WBGene00022232	K10D6.1;Y73B6BL.3	NA;NA
TSPOP144	2	1	0	0		?	WBGene00001169;WBGene00001169	R03G5.1d;R03G5.1a	NA;NA
TSPOP145	3	3	2	2	5,3	?	WBGene00010809;WBGene00013378;WBGene00019899	M01F1.3;Y62E10A.10;R05G6.5	CEOP3124;CEOP4544;NA
TSPOP146	2	2	0	0		?	WBGene00020517;WBGene00010722	T15B7.2;K09E4.4	NA;NA
TSPOP147	2	2	2	2	4,3	?	WBGene00000761;WBGene00007111	C24A11.9;B0035.12	CEOP1248;CEOP4440
TSPOP148	2	1	0	0		?	WBGene00007880	C33A12.1	NA
TSPOP149	2	2	2	2	2,2	?	WBGene00003407;WBGene00009829	F57C12.5c;F47G9.1	CEOPX154;CEOP5522
TSPOP15	2	2	2	1	6	identical	WBGene00006736;WBGene00020422	T10F2.3;T10F2.2	CEOP3260;CEOP3260
TSPOP150	2	1	0	0		?	WBGene00022861	ZK1193.5d	NA
TSPOP151	2	1	1	1	2	?	WBGene00016374	C33H5.7	CEOP4248
TSPOP152	2	2	2	2	4,1	?	WBGene00006724;WBGene00022434	C08B11.7;Y108G3AL.2	CEOP2328;CEOP5006
TSPOP153	2	2	2	2	3,3	?	WBGene00007645;WBGene00022121	C17E4.6;Y71F9AM.4a	CEOP1544;CEOP1076
TSPOP154	3	2	1	1	3	1,NA	WBGene00017646;WBGene00011436	F20H11.1;T04F3.1a	CEOP3392;NA
TSPOP155	2	1	1	1	3	?	WBGene00003594	Y56A3A.13	CEOP3744
TSPOP156	2	2	2	2	2,3	?	WBGene00022380;WBGene00022381	Y94H6A.8;Y94H6A.9a	CEOP4068;CEOP4665
TSPOP157	2	2	1	1	2	1,NA	WBGene00020030;WBGene00016534	R12E2.1;C39D10.7	CEOP1148;NA
TSPOP158	2	2	1	1	2	1,NA	WBGene00011451;WBGene00017534	T04H1.5;F17A9.2	CEOP5336;NA
TSPOP159	2	2	0	0		?	WBGene00017765;WBGene00017037	F25B4.1;D1069.3b	NA;NA
TSPOP16	2	2	2	2	2,3	?	WBGene00011144;WBGene00021133	R08D7.4b;W10D9.5a	CEOP3560;CEOP2686
TSPOP160	2	2	1	1	3	1,NA	WBGene00044329;WBGene00018281	F11A10.8;F41D9.1	CEOP4490;NA
TSPOP161	2	2	1	1	2	1,NA	WBGene00006918;WBGene00000295	ZK970.4;W01C8.6b	CEOP2476;NA
TSPOP162	2	2	1	1	2	1,NA	WBGene00004494;WBGene00022416	K02B2.5;Y102A11A.6	CEOP4611;NA
TSPOP163	3	2	1	1	2	1,NA	WBGene00022471;WBGene00011939	Y119C1B.5;T23B5.1a	CEOP1947;NA
TSPOP164	2	2	2	1	5	identical	WBGene00009648;WBGene00023422	F43C1.3;F43C1.6	CEOP3164;CEOP3164
TSPOP165	2	2	2	2	3,2	?	WBGene00003162;WBGene00008769	F20H11.3;F13G3.11	CEOP3392;CEOP1392
TSPOP166	2	2	2	1	3	reversed	WBGene00014027;WBGene00006768	ZK637.9b;ZK637.8f	CEOP3556;CEOP3556
TSPOP167	2	2	1	1	3	1,NA	WBGene00006540;WBGene00017811	F58A4.8;F26A1.13	CEOP3608;NA
TSPOP168	2	1	0	0		?	WBGene00001281	F10B5.6	NA
TSPOP169	2	2	0	0		?	WBGene00008345;WBGene00219217	C56A3.6b;C08F8.15	NA;NA
TSPOP17	3	3	2	2	2,3	?	WBGene00011144;WBGene00021133;WBGene00006727	R08D7.4b;W10D9.5a;F25B5.4a	CEOP3560;CEOP2686;NA
TSPOP170	2	1	1	1	2	?	WBGene00002002	K08E7.2	CEOP4520
TSPOP171	2	2	1	1	3	1,NA	WBGene00008684;WBGene00004228	F11A10.3a;R09H10.4	CEOP4490;NA
TSPOP172	3	2	1	1	7	1,NA	WBGene00009735;WBGene00022801	F45G2.9;ZK688.6a	CEOP3792;NA
TSPOP173	2	2	0	0		?	WBGene00003999;WBGene00006449	C05A9.1a;ZK757.3b	NA;NA
TSPOP174	2	2	1	1	2	1,NA	WBGene00020092;WBGene00012529	R144.2a;Y32F6A.4	CEOP3868;NA
TSPOP175	2	2	0	0		?	WBGene00002217;WBGene00006620	F56E3.3c;C07G1.1	NA;NA
TSPOP176	2	1	1	1	2	?	WBGene00000247	T19E7.3a	CEOP4172
TSPOP177	2	2	1	1	2	1,NA	WBGene00017734;WBGene00020216	F23C8.5a;T04G9.5	CEOP1044;NA
TSPOP178	2	2	0	0		?	WBGene00008220;WBGene00012342	C50B6.7;W08D2.7	NA;NA
TSPOP179	2	1	1	1	3	?	WBGene00015207	B0495.8a	CEOP2308
TSPOP18	2	2	2	2	1,2	?	WBGene00302986;WBGene00013317	Y37E11AM.4;Y57G11C.22a	CEOP5604;CEOP4661
TSPOP180	2	2	1	1	2	1,NA	WBGene00004430;WBGene00019492	Y45F10D.12;K07E3.4b	CEOP4560;NA
TSPOP181	2	2	1	1	3	1,NA	WBGene00015487;WBGene00003047	C05D11.10;T03F6.5	CEOP3372;NA
TSPOP182	2	1	0	0		?	WBGene00003377	C39E6.4	NA
TSPOP183	2	2	0	0		?	WBGene00001793;WBGene00012600	Y46G5A.31;Y38E10A.22a	NA;NA
TSPOP184	2	2	0	0		?	WBGene00022785;WBGene00018867	ZK652.6a;F55A12.10	NA;NA
TSPOP185	2	2	0	0		?	WBGene00003802;WBGene00020276	Y56A3A.17;T05H4.15c	NA;NA
TSPOP186	2	2	1	1	4	1,NA	WBGene00004095;WBGene00003975	F52C9.8f;T28D6.9	CEOP3284;NA
TSPOP187	2	2	1	1	2	1,NA	WBGene00009341;WBGene00012258	F32H2.4;W04G3.5a	CEOP1520;NA
TSPOP188	2	2	0	0		?	WBGene00008749;WBGene00022798	F13E6.5;ZK688.3	NA;NA
TSPOP189	2	2	0	0		?	WBGene00001579;WBGene00001018	F56A11.1;C28H8.12	NA;NA
TSPOP190	2	1	0	0		?	WBGene00018531	F47B3.7	NA
TSPOP191	2	1	1	1	2	?	WBGene00021021	W04B5.4	CEOP3076
TSPOP192	2	2	0	0		?	WBGene00019498;WBGene00018208	K07E8.7a;F39G3.3	NA;NA
TSPOP193	2	1	0	0		?	WBGene00016400	C34D4.4	NA
TSPOP194	2	1	1	1	2	?	WBGene00002185	T27E9.4a	CEOP3800
TSPOP195	2	2	1	1	2	1,NA	WBGene00022078;WBGene00044720	Y69A2AR.7a;Y53F4B.42	CEOP4658;NA
TSPOP196	2	2	1	1	6	1,NA	WBGene00020636;WBGene00022664	T20H4.5;ZK121.2	CEOP3424;NA
TSPOP197	2	2	1	1	3	1,NA	WBGene00017981;WBGene00020687	F32D1.1a;T22D1.10	CEOP5052;NA
TSPOP198	2	2	0	0		?	WBGene00000516;WBGene00003020	T05A6.1;C32F10.2	NA;NA
TSPOP199	2	2	1	1	3	1,NA	WBGene00010230;WBGene00019082	F58A4.9;F59A3.9	CEOP3608;NA
TSPOP2	2	1	0	0		?	WBGene00001510	ZK1307.6	NA
TSPOP200	2	2	1	1	3	1,NA	WBGene00010479;WBGene00020140	K01G5.8a;T01B11.4	CEOP3700;NA
TSPOP201	3	3	1	1	3	1,NA,NA	WBGene00016990;WBGene00010283;WBGene00006786	CD4.4;F58G11.6;Y60A3A.1	CEOP5076;NA;NA
TSPOP202	2	2	0	0		?	WBGene00010283;WBGene00006786	F58G11.6;Y60A3A.1	NA;NA
TSPOP203	2	2	1	1	2	1,NA	WBGene00022599;WBGene00020088	ZC395.10;R119.2	CEOP3276;NA
TSPOP204	2	1	1	1	2	?	WBGene00000564	R01H10.8	CEOP3890
TSPOP205	2	2	1	1	3	1,NA	WBGene00012645;WBGene00019199	Y39A1A.6;H14E04.2b	CEOP3688;NA
TSPOP206	2	2	2	2	3,2	?	WBGene00002850;WBGene00009284	C16A3.3;F31C3.2b	CEOP3368;CEOP1965
TSPOP207	2	2	1	1	2	1,NA	WBGene00017547;WBGene00004762	F18A1.6b;F35G12.3a	CEOP2668;NA
TSPOP208	2	2	1	1	4	1,NA	WBGene00004185;WBGene00000101	R166.4;D1022.7b	CEOP2492;NA
TSPOP209	2	2	0	0		?	WBGene00001329;WBGene00016311	T04C10.2b;C32D5.3	NA;NA
TSPOP21	2	1	0	0		?	WBGene00044121	C35C5.11	NA
TSPOP210	2	2	1	1	3	1,NA	WBGene00001262;WBGene00022055	K10D2.6;Y67D2.5	CEOP3848;NA
TSPOP211	2	2	2	2	2,3	?	WBGene00006840;WBGene00017982	R05D3.7;F32D1.2	CEOP3512;CEOP5052
TSPOP212	2	2	0	0		?	WBGene00005674;WBGene00002008	Y45F10B.6;F43E2.8a	NA;NA
TSPOP213	2	1	1	1	2	?	WBGene00015133	B0303.15	CEOP3538
TSPOP214	2	2	0	0		?	WBGene00020397;WBGene00020160	T10B11.1;T02C5.3b	NA;NA
TSPOP215	2	1	2	1	2	1,1	WBGene00012929;WBGene00012929	Y47D3A.16;Y47D3A.16	CEOP3825;CEOP3825
TSPOP216	2	2	0	0		?	WBGene00002179;WBGene00021074	T22C1.7;W07E6.2a	NA;NA
TSPOP217	2	2	1	1	2	1,NA	WBGene00013209;WBGene00019227	Y54G9A.6;H22K11.4a	CEOP2618;NA
TSPOP218	2	2	1	1	3	1,NA	WBGene00016754;WBGene00015168	C48E7.11;B0403.4	CEOP1316;NA
TSPOP219	2	2	1	1	2	1,NA	WBGene00006729;WBGene00006816	K07B1.3;F54B11.3a	CEOP5224;NA
TSPOP22	3	2	1	1	3	1,NA	WBGene00011773;WBGene00011775	T14G10.3;T14G10.5d	CEOP4619;NA
TSPOP220	2	2	1	1	2	1,NA	WBGene00001617;WBGene00021228	F41B4.4b;Y19D10A.13	CEOPX084;NA
TSPOP221	2	1	1	1	3	?	WBGene00006768	ZK637.8e	CEOP3556
TSPOP222	2	2	1	1	4	1,NA	WBGene00012641;WBGene00016073	Y39A1A.1c;C24H12.4a	CEOP3684;NA
TSPOP223	2	2	2	1	3	reversed	WBGene00023450;WBGene00011730	T12D8.10;T12D8.2	CEOP3818;CEOP3818
TSPOP224	2	2	1	1	2	1,NA	WBGene00022704;WBGene00009288	ZK353.9;F31C3.6a	CEOP3522;NA
TSPOP225	2	2	1	1	3	1,NA	WBGene00012204;WBGene00017716	W02B12.9;F22F4.1	CEOP2540;NA
TSPOP226	2	2	1	1	2	1,NA	WBGene00012768;WBGene00006634	Y41E3.10b;F33C8.3	CEOP4685;NA
TSPOP227	2	1	0	0		?	WBGene00013042;WBGene00013042	Y49E10.23a;Y49E10.23b	NA;NA
TSPOP228	2	2	1	1	2	1,NA	WBGene00001233;WBGene00011802	T16G1.11;T16G1.9	CEOP5376;NA
TSPOP229	2	1	0	0		?	WBGene00010488	K02A11.3	NA
TSPOP23	2	1	1	1	3	?	WBGene00015555	C06G3.9	CEOP4208
TSPOP230	2	2	2	2	2,3	?	WBGene00021844;WBGene00010325	Y54E10BR.5;F59C6.4	CEOP1924;CEOP1616
TSPOP231	2	2	2	2	3,4	?	WBGene00022188;WBGene00010615	Y71H2AR.1;K07A1.9f	CEOP3086;CEOP1552
TSPOP232	2	2	0	0		?	WBGene00009675;WBGene00011976	F44A6.3;T24B8.2	NA;NA
TSPOP233	2	2	0	0		?	WBGene00002203;WBGene00002202	F46F2.2b;C03C10.1	NA;NA
TSPOP234	2	2	2	1	2	identical	WBGene00013802;WBGene00013803	Y116A8C.25a;Y116A8C.26b	CEOP4632;CEOP4632
TSPOP235	2	2	1	1	4	1,NA	WBGene00008667;WBGene00007969	F10G8.9b;C36A4.9b	CEOP1584;NA
TSPOP236	2	1	0	0		?	WBGene00010909	M88.7	NA
TSPOP237	2	2	0	0		?	WBGene00002977;WBGene00006780	Y105E8A.7b;B0350.2e	NA;NA
TSPOP238	2	2	1	1	4	1,NA	WBGene00019245;WBGene00001017	H27M09.1;ZK593.5e	CEOP1902;NA
TSPOP239	2	2	1	1	2	1,NA	WBGene00011631;WBGene00012144	T08G11.4b;T28H10.3	CEOP1508;NA
TSPOP24	2	2	1	1	4	1,NA	WBGene00004385;WBGene00001161	K08D10.4;Y102A5C.18	CEOP4116;NA
TSPOP240	2	2	1	1	2	1,NA	WBGene00020391;WBGene00022855	T10B5.5b;ZK1127.9b	CEOP5560;NA
TSPOP241	2	2	2	2	2,3	?	WBGene00011274;WBGene00007021	R53.5;C24H11.6	CEOP2734;CEOP3831
TSPOP242	2	2	0	0		?	WBGene00004180;WBGene00000875	F58A4.4a;K08E3.6	NA;NA
TSPOP243	2	2	1	1	4	1,NA	WBGene00007617;WBGene00016015	C15H11.9;C23G10.8	CEOP5416;NA
TSPOP244	2	1	0	0		?	WBGene00017758	F23H11.2	NA
TSPOP245	2	2	2	1	2	reversed	WBGene00016249;WBGene00004460	C30C11.1;C30C11.2	CEOP3528;CEOP3528
TSPOP246	2	2	1	1	3	1,NA	WBGene00018131;WBGene00021738	F37A4.1;Y50D4A.4a	CEOP3400;NA
TSPOP247	2	2	0	0		?	WBGene00016469;WBGene00010403	C36B7.6;H19J13.1	NA;NA
TSPOP248	2	1	1	1	2	?	WBGene00015160	B0361.6	CEOP3833
TSPOP249	2	2	0	0		?	WBGene00014205;WBGene00017673	ZK1058.5;F21F3.3	NA;NA
TSPOP25	2	1	1	1	6	?	WBGene00009771	F46B6.6a	CEOP5236
TSPOP250	2	1	0	0		?	WBGene00008882	F16B12.6	NA
TSPOP251	2	2	1	1	2	1,NA	WBGene00000536;WBGene00017010	ZC395.2;D1007.15a	CEOP3280;NA
TSPOP252	2	2	1	1	4	1,NA	WBGene00015809;WBGene00021815	C16A3.4;Y53G8AR.8	CEOP3364;NA
TSPOP253	2	2	2	2	2,2	?	WBGene00022192;WBGene00014218	Y71H2B.2;ZK1098.1a	CEOP3853;CEOP3596
TSPOP254	2	2	1	1	2	1,NA	WBGene00013237;WBGene00016508	Y56A3A.19;C37H5.5	CEOP3738;NA
TSPOP255	2	2	1	1	5	1,NA	WBGene00009648;WBGene00016503	F43C1.3;C37C3.11	CEOP3164;NA
TSPOP256	3	3	2	1	2	1,2,NA	WBGene00003882;WBGene00010333;WBGene00007186	F59E10.1;F59E10.3;B0464.6	CEOP2508;CEOP2508;NA
TSPOP257	3	3	2	2	3,2	?	WBGene00019301;WBGene00021311;WBGene00003593	K02D10.1b;Y32H12A.2a;F42A10.2a	CEOP3540;CEOP3292;NA
TSPOP258	2	2	1	1	5	1,NA	WBGene00010809;WBGene00004255	M01F1.3;T20G5.5	CEOP3124;NA
TSPOP259	2	1	0	0		?	WBGene00000532	C07H4.2	NA
TSPOP26	2	2	2	1	5	reversed	WBGene00195239;WBGene00022852	ZK1127.13;ZK1127.5	CEOP2280;CEOP2280
TSPOP260	2	2	2	2	2,2	?	WBGene00015173;WBGene00015648	B0412.3a;C09F5.2a	CEOP3036;CEOP3859
TSPOP261	2	2	1	1	4	1,NA	WBGene00000985;WBGene00003033	C15H11.4;F34D10.5	CEOP5416;NA
TSPOP262	4	4	3	2	5,2	?	WBGene00001660;WBGene00001661;WBGene00006755;WBGene00020443	C34E10.3;C34E10.2;ZK1098.10a;T12A2.15a	CEOP3272;CEOP3272;CEOP3830;NA
TSPOP263	2	2	1	1	3	1,NA	WBGene00006515;WBGene00015104	C05D11.3;B0280.9	CEOP3376;NA
TSPOP264	3	3	2	2	2,3	?	WBGene00022166;WBGene00022167;WBGene00006484	Y71H2AM.1;Y71H2AM.2;F08A8.6	CEOP5632;CEOP3086;NA
TSPOP265	2	1	1	1	3	?	WBGene00007013	Y62F5A.1b	CEOP2552
TSPOP266	2	2	1	1	2	1,NA	WBGene00020268;WBGene00002079	T05H4.5;Y48G1A.5a	CEOP5112;NA
TSPOP267	2	2	1	1	2	1,NA	WBGene00020268;WBGene00002079	T05H4.5;Y48G1A.5a	CEOP5112;NA
TSPOP268	2	2	1	1	2	1,NA	WBGene00012187;WBGene00001166	W01G7.3;ZK328.2	CEOP2624;NA
TSPOP269	2	2	1	1	2	1,NA	WBGene00007912;WBGene00017963	C34B7.2;F31F4.17	CEOP1464;NA
TSPOP27	3	1	1	1	3	?	WBGene00003870	C18E9.11a	CEOP2404
TSPOP270	2	2	1	1	3	1,NA	WBGene00022402;WBGene00006780	Y97E10AR.7;B0350.2h	CEOP5172;NA
TSPOP271	4	3	2	1	2	1,2,NA	WBGene00018431;WBGene00022576;WBGene00009966	F44E7.9;ZC250.2;F53B7.3	CEOP5084;CEOP5084;NA
TSPOP272	2	2	0	0		?	WBGene00000433;WBGene00000224	ZK265.4a;F26D10.9a	NA;NA
TSPOP273	2	2	1	1	2	1,NA	WBGene00004497;WBGene00020835	Y41D4B.5;T27A1.3b	CEOP4640;NA
TSPOP274	2	2	2	2	3,2	?	WBGene00019460;WBGene00021350	K06H7.9;Y37E3.8a	CEOP3480;CEOP1032
TSPOP275	2	1	0	0		?	WBGene00013123	Y52B11A.3a	NA
TSPOP276	2	1	1	1	3	?	WBGene00003059	C48E7.3	CEOP1316
TSPOP277	2	1	0	0		?	WBGene00003417	Y41C4A.14	NA
TSPOP278	2	2	1	1	2	1,NA	WBGene00007927;WBGene00002261	C34C12.8;F58A3.1a	CEOP3120;NA
TSPOP279	2	1	0	0		?	WBGene00014224	ZK1098.7	NA
TSPOP28	2	1	2	1	2	1,1	WBGene00012765;WBGene00012765	Y41E3.7a;Y41E3.7c	CEOP4581;CEOP4581
TSPOP280	2	2	0	0		?	WBGene00011543;WBGene00007972	T06E8.1a;C36B1.5	NA;NA
TSPOP281	2	2	1	1	2	1,NA	WBGene00021363;WBGene00012550	Y37E11AL.8;Y37D8A.10	CEOP4653;NA
TSPOP282	2	2	0	0		?	WBGene00018872;WBGene00010496	F55C12.5a;K02B12.3	NA;NA
TSPOP283	2	1	0	0		?	WBGene00010776	K11E4.4b	NA
TSPOP284	2	2	2	2	1,4	?	WBGene00016427;WBGene00017293	C34H4.5a;F09E5.17	CEOP4631;CEOP2168
TSPOP285	2	2	0	0		?	WBGene00008860;WBGene00000377	F15D4.3;T05C12.7	NA;NA
TSPOP286	2	2	1	1	2	1,NA	WBGene00020366;WBGene00006309	T08G2.3;D1014.1	CEOPX144;NA
TSPOP287	2	2	0	0		?	WBGene00016800;WBGene00013702	C50C3.2;Y106G6D.6	NA;NA
TSPOP288	2	1	0	0		?	WBGene00007059	F08C6.3	NA
TSPOP289	2	2	1	1	5	1,NA	WBGene00001092;WBGene00004377	F53A2.5;F49E7.1a	CEOP3784;NA
TSPOP29	2	1	0	0		?	WBGene00011095	R07B7.11	NA
TSPOP290	2	2	1	1	2	1,NA	WBGene00020417;WBGene00008920	T10E9.7;F17C11.9a	CEOP1326;NA
TSPOP291	2	2	1	1	2	1,NA	WBGene00011247;WBGene00002248	R11D1.9;T22A3.8	CEOP5368;NA
TSPOP292	2	2	0	0		?	WBGene00007959;WBGene00000774	C35C5.10a;F56A8.6	NA;NA
TSPOP293	2	2	1	1	2	1,NA	WBGene00001151;WBGene00004488	F38H4.8a;T05F1.3	CEOP4660;NA
TSPOP294	2	2	2	2	3,2	?	WBGene00011722;WBGene00009551	T11G6.8a;F38H4.10	CEOP4396;CEOP4480
TSPOP295	2	2	0	0		?	WBGene00002069;WBGene00000497	C04F12.3;F48A11.1c	NA;NA
TSPOP296	2	1	0	0		?	WBGene00015425	C04E6.11	NA
TSPOP297	2	2	0	0		?	WBGene00011511;WBGene00003084	T05H10.7b;R160.7	NA;NA
TSPOP298	3	3	2	1	6	2,1,NA	WBGene00013807;WBGene00013804;WBGene00010386	Y116A8C.30a;Y116A8C.27a;H12D21.10a	CEOP4596;CEOP4596;NA
TSPOP299	2	1	0	0		?	WBGene00001559	F45H7.2d	NA
TSPOP3	2	2	1	1	4	1,NA	WBGene00012641;WBGene00018793	Y39A1A.1c;F54C4.1	CEOP3684;NA
TSPOP30	2	2	0	0		?	WBGene00009226;WBGene00015926	F28G4.1;C17H11.6b	NA;NA
TSPOP300	2	2	1	1	5	1,NA	WBGene00008236;WBGene00007784	C50F4.12;C27H6.2	CEOP5232;NA
TSPOP301	2	2	1	1	2	1,NA	WBGene00013236;WBGene00000800	Y56A3A.18;Y23H5A.7c	CEOP3740;NA
TSPOP302	2	2	1	1	2	1,NA	WBGene00017919;WBGene00016611	F29B9.1;C43G2.2b	CEOP4136;NA
TSPOP303	2	2	2	2	4,3	?	WBGene00006931;WBGene00008685	T20D3.7d;F11A10.4a	CEOP4328;CEOP4492
TSPOP304	2	2	1	1	2	1,NA	WBGene00022056;WBGene00015913	Y67D2.6;C17F4.7	CEOP3860;NA
TSPOP305	2	2	1	1	3	1,NA	WBGene00009992;WBGene00000478	F53F4.10;F27E11.3	CEOP5392;NA
TSPOP306	2	2	1	1	2	1,NA	WBGene00011017;WBGene00018181	R04F11.5;F38E1.9	CEOP5344;NA
TSPOP307	2	2	0	0		?	WBGene00013093;WBGene00021292	Y51H1A.2e;Y25C1A.5	NA;NA
TSPOP308	2	1	1	1	2	?	WBGene00013789	Y116A8C.9a	CEOP4592
TSPOP309	2	2	0	0		?	WBGene00003411;WBGene00009145	F14F4.3;F26A3.7	NA;NA
TSPOP31	2	2	2	2	3,2	?	WBGene00022803;WBGene00006728	ZK688.9;ZK1010.1	CEOP3462;CEOP3768
TSPOP310	3	3	1	1	2	1,NA,NA	WBGene00022296;WBGene00018135;WBGene00019953	Y76B12C.2;F37A4.5;R08C7.10b	CEOP4056;NA;NA
TSPOP311	2	2	1	1	2	1,NA	WBGene00003582;WBGene00008430	F52G2.1c;D2085.5b	CEOP4556;NA
TSPOP313	2	1	1	1	6	?	WBGene00004882	F46B6.3b	CEOP5236
TSPOP314	2	2	2	1	2	identical	WBGene00007113;WBGene00007114	B0035.15;B0035.16	CEOP4428;CEOP4428
TSPOP315	2	2	1	1	3	1,NA	WBGene00013434;WBGene00009211	Y66D12A.8a;F28D1.1	CEOP3723;NA
TSPOP316	2	2	2	2	2,2	?	WBGene00010725;WBGene00007026	K09E9.2;F32H2.2a	CEOPX156;CEOP1512
TSPOP317	2	1	0	0		?	WBGene00019148	H03E18.1	NA
TSPOP318	2	2	0	0		?	WBGene00009793;WBGene00003562	F46F6.2a;F09G8.4	NA;NA
TSPOP319	2	2	1	1	2	1,NA	WBGene00003064;WBGene00009460	R10H10.1;F36A2.13	CEOP4376;NA
TSPOP32	2	2	2	2	2,3	?	WBGene00003583;WBGene00007101	EEED8.8;B0024.11	CEOP2743;CEOP5252
TSPOP320	2	2	0	0		?	WBGene00006836;WBGene00007179	C47E8.7;B0457.4	NA;NA
TSPOP321	2	1	0	0		?	WBGene00007155	B0379.1a	NA
TSPOP322	2	2	1	1	2	1,NA	WBGene00015513;WBGene00017814	C06A8.2;F26A10.2	CEOP2731;NA
TSPOP323	2	2	1	1	4	1,NA	WBGene00013218;WBGene00012830	Y54G11A.9;Y43F8C.8	CEOP2636;NA
TSPOP324	2	2	0	0		?	WBGene00004854;WBGene00007260	F40E10.4;C02C6.2a	NA;NA
TSPOP325	2	1	1	1	2	?	WBGene00021348	Y37E3.4	CEOP1028
TSPOP326	2	2	0	0		?	WBGene00016406;WBGene00002031	C34D10.1;Y34B4A.3	NA;NA
TSPOP327	2	2	2	2	2,2	?	WBGene00020909;WBGene00011239	W01A11.1a;R11A8.5	CEOP5118;CEOP4372
TSPOP328	2	1	1	1	2	?	WBGene00017016	D1014.3a	CEOP5180
TSPOP329	2	2	0	0		?	WBGene00012337;WBGene00010699	W07G4.3;K08H10.9	NA;NA
TSPOP33	2	2	2	1	4	reversed	WBGene00018356;WBGene00004055	F42G8.5;B0218.3	CEOP4272;CEOP4272
TSPOP330	2	2	1	1	4	1,NA	WBGene00018610;WBGene00017313	F48E8.3;F09G2.4	CEOP3304;NA
TSPOP331	3	3	3	3	2,2,2	?	WBGene00013332;WBGene00016496;WBGene00010037	Y57G11C.43;C37C3.2;F54C8.4a	CEOP4667;CEOP5611;CEOP3580
TSPOP332	2	2	2	2	3,3	?	WBGene00007760;WBGene00011067	C27B7.2;R06F6.2	CEOP4312;CEOP2504
TSPOP333	2	2	1	1	3	1,NA	WBGene00017062;WBGene00007980	D2063.3a;C36E8.1	CEOP5052;NA
TSPOP334	2	1	0	0		?	WBGene00011834	T19B10.6	NA
TSPOP335	2	2	1	1	2	1,NA	WBGene00010231;WBGene00003394	F58B3.4;T07H6.2	CEOP4460;NA
TSPOP336	2	2	1	1	3	1,NA	WBGene00004205;WBGene00004446	F29B9.4c;T24B8.1a	CEOP4128;NA
TSPOP337	2	1	1	1	2	?	WBGene00017360	F10E9.11	CEOP3504
TSPOP338	3	3	3	2	3,2	?	WBGene00011334;WBGene00010993;WBGene00006369	T01E8.6;R03E1.2;R03E1.1	CEOP2472;CEOPX128;CEOPX128
TSPOP339	2	2	1	1	4	1,NA	WBGene00006446;WBGene00009200	F28F8.6;F28C1.1	CEOP5444;NA
TSPOP34	2	2	0	0		?	WBGene00008029;WBGene00006619	C39E9.5;ZK546.15	NA;NA
TSPOP340	2	1	0	0		?	WBGene00010459	K01C8.7a	NA
TSPOP341	2	2	1	1	4	1,NA	WBGene00021377;WBGene00019825	Y37E11B.5;R02D3.8	CEOP4100;NA
TSPOP342	2	1	0	0		?	WBGene00021060	W06B11.3	NA
TSPOP343	2	2	1	1	2	1,NA	WBGene00006647;WBGene00019998	F53G2.6a;R10H1.1	CEOP2070;NA
TSPOP344	2	2	1	1	2	1,NA	WBGene00019333;WBGene00016331	K02F3.10;C32F10.1b	CEOP3040;NA
TSPOP345	2	2	1	1	2	1,NA	WBGene00004897;WBGene00000992	T10H9.4;F27D9.6	CEOP5128;NA
TSPOP346	2	2	0	0		?	WBGene00000368;WBGene00010933	T28F2.5;M162.7	NA;NA
TSPOP348	3	3	3	1	5	identical	WBGene00019005;WBGene00019006;WBGene00019007	F57B10.8;F57B10.9;F57B10.14	CEOP1332;CEOP1332;CEOP1332
TSPOP349	2	1	0	0		?	WBGene00002299	ZK1067.1d	NA
TSPOP35	2	2	0	0		?	WBGene00021930;WBGene00021920	Y55F3AM.13;Y55F3AM.1	NA;NA
TSPOP350	2	2	1	1	2	1,NA	WBGene00006434;WBGene00013668	F09E5.15c;Y105E8A.3	CEOP2745;NA
TSPOP351	2	2	2	1	3	identical	WBGene00016621;WBGene00016622	C43H8.1;C43H8.2	CEOP1628;CEOP1628
TSPOP352	2	1	1	1	2	?	WBGene00013344	Y59A8B.7	CEOP5464
TSPOP353	2	2	0	0		?	WBGene00012791;WBGene00008136	Y43D4A.5d;C47D12.2	NA;NA
TSPOP354	2	2	0	0		?	WBGene00006876;WBGene00001534	ZK1151.1b;F52E1.4a	NA;NA
TSPOP355	2	2	0	0		?	WBGene00002123;WBGene00022171	C16E9.4b;Y71H2AM.6a	NA;NA
TSPOP356	2	1	2	1	2	1,1	WBGene00021295;WBGene00021295	Y25C1A.8a;Y25C1A.8a	CEOP2084;CEOP2084
TSPOP357	2	2	1	1	4	1,NA	WBGene00012230;WBGene00006061	W03H9.4b;F30A10.5b	CEOP2628;NA
TSPOP358	2	1	0	0		?	WBGene00007479	C09F9.2	NA
TSPOP359	3	3	1	1	5	1,NA,NA	WBGene00015191;WBGene00009443;WBGene00022277	B0432.10;F35G12.7;Y74C9A.3	CEOP2020;NA;NA
TSPOP36	2	2	2	1	2	reversed	WBGene00009726;WBGene00000222	F45E6.3;F45E6.2	CEOPX108;CEOPX108
TSPOP360	3	3	2	1	2	2,1,NA	WBGene00007194;WBGene00007189;WBGene00004790	B0491.7;B0491.1;F07H5.2	CEOP2532;CEOP2532;NA
TSPOP361	2	2	2	1	3	identical	WBGene00006919;WBGene00018512	F46F11.5;F46F11.9a	CEOP1264;CEOP1264
TSPOP362	2	2	0	0		?	WBGene00017066;WBGene00001209	D2092.5;C27D11.1	NA;NA
TSPOP363	2	2	1	1	3	1,NA	WBGene00009286;WBGene00021609	F31C3.4;Y46H3D.4	CEOP1776;NA
TSPOP364	2	1	0	0		?	WBGene00016002	C18H9.3c	NA
TSPOP365	2	1	0	0		?	WBGene00015522	C06E1.7	NA
TSPOP366	2	2	0	0		?	WBGene00017098;WBGene00015125	E02D9.1c;B0303.3	NA;NA
TSPOP367	2	2	1	1	3	1,NA	WBGene00000426;WBGene00004888	Y106G6E.5b;K12C11.2	CEOP1592;NA
TSPOP368	2	2	0	0		?	WBGene00023407;WBGene00021931	F56D1.6;Y55F3AM.14	NA;NA
TSPOP369	2	1	0	0		?	WBGene00009450;WBGene00009450	F35H8.6;F35H8.6	NA;NA
TSPOP37	2	2	1	1	3	1,NA	WBGene00001497;WBGene00019928	T08B2.9b;R07C3.12	CEOP1312;NA
TSPOP370	2	2	2	1	4	identical	WBGene00006958;WBGene00011058	R06C1.3a;R06C1.2	CEOP1660;CEOP1660
TSPOP371	2	2	1	1	2	1,NA	WBGene00001056;WBGene00016494	K02F2.1a;C37A2.8a	CEOP1999;NA
TSPOP372	2	1	1	1	2	?	WBGene00017929	F29C4.7b	CEOP4004
TSPOP373	2	1	1	1	4	?	WBGene00009556	F39B2.5	CEOP1760
TSPOP374	2	2	2	2	4,3	?	WBGene00011975;WBGene00008134	T24B1.1;C47B2.9	CEOP1416;CEOP1786
TSPOP375	2	2	0	0		?	WBGene00006449;WBGene00017288	ZK757.3b;F09E5.10	NA;NA
TSPOP376	3	3	2	2	2,2	?	WBGene00020441;WBGene00004117;WBGene00004478	T12A2.7;F02E9.4b;F40F8.10	CEOP3360;CEOP1980;NA
TSPOP377	2	2	1	1	2	1,NA	WBGene00003148;WBGene00022733	H21P03.1;ZK418.3	CEOP4444;NA
TSPOP378	2	2	1	1	2	1,NA	WBGene00021854;WBGene00012398	Y54F10AR.1;Y6E2A.4	CEOP3861;NA
TSPOP379	2	2	0	0		?	WBGene00006449;WBGene00011910	ZK757.3a;T22B3.2a	NA;NA
TSPOP38	2	1	0	0		?	WBGene00010375	H09F14.1c	NA
TSPOP380	2	2	2	2	3,2	?	WBGene00003224;WBGene00011867	C09G4.5;T20G5.1	CEOP4294;CEOP3858
TSPOP381	2	2	1	1	3	1,NA	WBGene00022127;WBGene00006449	Y71F9B.3;ZK757.3b	CEOP1056;NA
TSPOP382	2	2	1	1	3	1,NA	WBGene00012645;WBGene00018213	Y39A1A.6;F39H12.2	CEOP3688;NA
TSPOP383	2	2	1	1	5	1,NA	WBGene00001740;WBGene00004130	ZC395.6;F54E2.3j	CEOP3272;NA
TSPOP384	2	2	1	1	2	1,NA	WBGene00008165;WBGene00006633	C47G2.4;T23D8.2	CEOP2694;NA
TSPOP385	2	2	1	1	2	1,NA	WBGene00015466;WBGene00008225	C05C8.9a;C50B8.3	CEOP5152;NA
TSPOP386	2	2	2	1	2	reversed	WBGene00019077;WBGene00019076	F59A3.4;F59A3.3	CEOP1256;CEOP1256
TSPOP387	2	2	0	0		?	WBGene00009920;WBGene00009099	F52B5.1a;F25B3.2	NA;NA
TSPOP388	2	2	1	1	2	1,NA	WBGene00009050;WBGene00004368	F22D6.2;C32E8.7	CEOP1364;NA
TSPOP389	3	3	1	1	2	1,NA,NA	WBGene00003794;WBGene00010941;WBGene00000417	Y41D4B.19b;M176.2;C48D1.2b	CEOP4615;NA;NA
TSPOP39	2	2	2	2	2,2	?	WBGene00000940;WBGene00006590	Y113G7A.9a;ZC395.3a	CEOP5500;CEOP3280
TSPOP390	2	2	2	1	3	identical	WBGene00000158;WBGene00013670	Y105E8A.9;Y105E8A.10c	CEOP1904;CEOP1904
TSPOP391	2	1	1	1	2	?	WBGene00006751	C32E8.10e	CEOP1112
TSPOP392	2	2	1	1	2	1,NA	WBGene00009452;WBGene00003953	F36A2.2;F39H11.5	CEOP1504;NA
TSPOP393	2	1	0	0		?	WBGene00007705	C25A1.1	NA
TSPOP394	2	1	1	1	2	?	WBGene00004034	F09E5.1	CEOP2745
TSPOP395	2	2	1	1	2	1,NA	WBGene00022045;WBGene00016331	Y66H1A.3;C32F10.1a	CEOP4028;NA
TSPOP396	2	2	1	1	3	1,NA	WBGene00011065;WBGene00010416	R06C7.6;H25P06.1	CEOP1380;NA
TSPOP397	2	1	1	1	4	?	WBGene00018149	F37C12.1	CEOP3416
TSPOP398	3	2	1	1	2	1,NA	WBGene00001558;WBGene00000269	Y57G11C.10c;Y73E7A.7a	CEOP4580;NA
TSPOP399	2	2	1	1	2	1,NA	WBGene00009563;WBGene00010730	F39H2.3;K10C3.2	CEOP1496;NA
TSPOP4	2	2	1	1	2	1,NA	WBGene00007528;WBGene00014215	C11H1.2;ZK1086.1b	CEOPX134;NA
TSPOP40	2	1	0	0		?	WBGene00007197	B0513.5a	NA
TSPOP400	2	2	1	1	4	1,NA	WBGene00010437;WBGene00022199	JC8.5a;Y71H10A.1a	CEOP4536;NA
TSPOP401	2	2	0	0		?	WBGene00001045;WBGene00009162	Y47H9C.5a;F26E4.7a	NA;NA
TSPOP402	2	1	0	0		?	WBGene00007744	C26D10.3	NA
TSPOP403	2	2	1	1	2	1,NA	WBGene00010665;WBGene00022373	K08E3.5a;Y92H12BR.8	CEOP3829;NA
TSPOP404	2	2	0	0		?	WBGene00001037;WBGene00019673	T05C3.5;K12C11.1a	NA;NA
TSPOP405	2	2	1	1	2	1,NA	WBGene00004895;WBGene00021536	CC4.3;Y42H9AR.1	CEOP1682;NA
TSPOP406	2	2	1	1	4	1,NA	WBGene00011972;WBGene00004194	T23G11.7b;C34C6.6a	CEOP1416;NA
TSPOP407	2	2	1	1	2	1,NA	WBGene00011272;WBGene00012735	R53.2;Y40B1A.4	CEOP2746;NA
TSPOP408	2	1	1	1	2	?	WBGene00017924	F29B9.10	CEOP4132
TSPOP409	2	2	0	0		?	WBGene00004809;WBGene00004807	F44G3.6;F46A9.5	NA;NA
TSPOP41	3	3	1	1	1	1,NA,NA	WBGene00016592;WBGene00003084;WBGene00009811	C42C1.15;R160.7;F47B8.10	CEOP4508;NA;NA
TSPOP410	2	2	2	2	2,3	?	WBGene00013041;WBGene00010731	Y49E10.22;K10C3.4a	CEOP3893;CEOP1566
TSPOP411	2	2	0	0		?	WBGene00006062;WBGene00000792	F30A10.8;F11C7.4	NA;NA
TSPOP412	2	2	0	0		?	WBGene00021095;WBGene00001118	W08F4.6;ZK520.3a	NA;NA
TSPOP413	2	2	0	0		?	WBGene00006807;WBGene00022744	C17D12.2c;ZK470.1	NA;NA
TSPOP414	2	2	0	0		?	WBGene00000670;WBGene00000603	Y41C4A.16;C46A5.3b	NA;NA
TSPOP415	2	2	1	1	3	1,NA	WBGene00012964;WBGene00000776	Y48A6B.3;T03E6.7a	CEOP3712;NA
TSPOP416	2	1	0	0		?	WBGene00000197	F28H1.3	NA
TSPOP417	2	2	2	1	3	identical	WBGene00000812;WBGene00021683	Y48G1C.2a;Y48G1C.10a	CEOP1940;CEOP1940
TSPOP418	3	2	1	1	7	1,NA	WBGene00000796;WBGene00022647	C14A4.4a;ZK54.1a	CEOP2496;NA
TSPOP419	2	2	1	1	4	1,NA	WBGene00008990;WBGene00014244	F20G4.1;ZK1307.1a	CEOP1432;NA
TSPOP42	2	2	1	1	2	1,NA	WBGene00022044;WBGene00006578	Y66H1A.2a;F25H2.1	CEOP4028;NA
TSPOP420	2	2	0	0		?	WBGene00006657;WBGene00009233	T12C9.3f;F28H6.4	NA;NA
TSPOP421	2	1	0	0		?	WBGene00001771	T28A11.11	NA
TSPOP422	4	3	2	2	5,3	?	WBGene00016142;WBGene00009187;WBGene00019143	C26E6.6;F27D4.1;H01M10.1	CEOP3244;CEOP1989;NA
TSPOP423	2	2	1	1	2	1,NA	WBGene00017088;WBGene00013852	E01A2.6;ZC101.3	CEOP1892;NA
TSPOP424	2	1	0	0		?	WBGene00016422	C34G6.6c	NA
TSPOP425	2	2	2	2	2,2	?	WBGene00004355;WBGene00011629	T07D4.3a;T08G11.1b	CEOP2706;CEOP1508
TSPOP426	2	1	1	1	4	?	WBGene00010766	K11B4.1	CEOP1764
TSPOP427	2	2	2	1	7	reversed	WBGene00007564;WBGene00007556	C14A4.14;C14A4.3	CEOP2496;CEOP2496
TSPOP428	2	1	0	0		?	WBGene00011580	T07D4.4e	NA
TSPOP429	2	1	0	0		?	WBGene00003928	ZK945.2	NA
TSPOP43	2	2	2	2	2,2	?	WBGene00001372;WBGene00018161	R09B3.1a;F38A5.2b	CEOP1656;CEOP4184
TSPOP430	2	2	2	2	4,3	?	WBGene00001486;WBGene00009002	F59G1.7;F21C3.3	CEOP2232;CEOP1384
TSPOP431	2	1	1	1	2	?	WBGene00004029	K09B11.1a	CEOP4552
TSPOP432	2	2	1	1	2	1,NA	WBGene00011940;WBGene00022391	T23B5.3c;Y95B8A.12e	CEOP4626;NA
TSPOP433	2	2	2	1	2	identical	WBGene00005025;WBGene00016889	C52E12.3;C52E12.4	CEOP2276;CEOP2276
TSPOP434	2	1	1	1	2	?	WBGene00008078	C44B9.1	CEOP3813
TSPOP436	2	2	2	2	2,2	?	WBGene00022453;WBGene00022450	Y110A2AR.3a;Y110A2AM.3a	CEOP2076;CEOP2074
TSPOP437	2	2	0	0		?	WBGene00009217;WBGene00007302	F28D1.8;C04F12.8	NA;NA
TSPOP438	2	2	1	1	2	1,NA	WBGene00006833;WBGene00019491	F53F10.4c;K07E3.2	CEOP1116;NA
TSPOP439	2	2	2	1	6	identical	WBGene00003390;WBGene00019221	H20J04.8;H20J04.6	CEOP2124;CEOP2124
TSPOP44	2	2	2	1	2	reversed	WBGene00022835;WBGene00003061	ZK973.9;ZK973.10	CEOP1176;CEOP1176
TSPOP440	2	1	1	1	5	?	WBGene00008458	E02H1.6	CEOP2436
TSPOP441	2	1	1	1	2	?	WBGene00007603	C15C6.4	CEOP1664
TSPOP442	2	1	0	0		?	WBGene00017904	F28F5.3c	NA
TSPOP443	2	1	0	0		?	WBGene00020068	R13F6.10	NA
TSPOP444	2	1	0	0		?	WBGene00009552	F39B1.1	NA
TSPOP445	2	2	2	2	4,2	?	WBGene00006946;WBGene00012714	C34E10.4b;Y39E4B.1	CEOP3268;CEOP3819
TSPOP446	2	2	0	0		?	WBGene00016674;WBGene00011441	C45G9.2;T04F8.2	NA;NA
TSPOP447	2	2	0	0		?	WBGene00000817;WBGene00000959	B0547.1;F46H6.2a	NA;NA
TSPOP448	2	1	0	0		?	WBGene00019627	K10D2.1a	NA
TSPOP449	2	2	2	2	4,2	?	WBGene00000202;WBGene00017286	Y6D11A.1;F09E5.8	CEOP3044;CEOP2164
TSPOP45	2	2	2	2	2,2	?	WBGene00013231;WBGene00013920	Y56A3A.11;ZC506.3	CEOP3736;CEOPX107
TSPOP450	2	2	0	0		?	WBGene00021929;WBGene00009856	Y55F3AM.12;F49A5.4a	NA;NA
TSPOP451	2	2	1	1	2	1,NA	WBGene00000184;WBGene00004298	Y116A8C.12;W06D4.6	CEOP4669;NA
TSPOP452	2	2	2	2	4,3	?	WBGene00010721;WBGene00013361	K09E4.3a;Y60A3A.13c	CEOP2628;CEOP5496
TSPOP453	2	2	1	1	2	1,NA	WBGene00006708;WBGene00021883	Y54G2A.31;Y54G2A.18	CEOP4072;NA
TSPOP455	2	1	0	0		?	WBGene00000162	W09G10.4a	NA
TSPOP456	2	2	2	2	4,4	?	WBGene00016390;WBGene00016412	C34B2.5;C34E10.11	CEOP1636;CEOP3268
TSPOP457	2	1	0	0		?	WBGene00009881	F49C12.12a	NA
TSPOP458	2	1	0	0		?	WBGene00018193	F39C12.1	NA
TSPOP459	2	2	0	0		?	WBGene00005662;WBGene00002804	W03B1.4a;Y110A7A.19	NA;NA
TSPOP46	2	2	2	2	2,3	?	WBGene00001566;WBGene00021904	C28C12.9;Y55B1AL.2	CEOP4292;CEOP3828
TSPOP460	2	2	2	1	2	reversed	WBGene00012756;WBGene00001235	Y41C4A.9;Y41C4A.10	CEOP3728;CEOP3728
TSPOP461	2	2	0	0		?	WBGene00013109;WBGene00013111	Y51H4A.15;Y51H4A.17a	NA;NA
TSPOP462	2	2	1	1	5	1,NA	WBGene00021758;WBGene00003006	Y50D7A.10;Y71F9B.5c	CEOP3851;NA
TSPOP463	2	1	0	0		?	WBGene00010023	F54B8.9	NA
TSPOP464	3	2	2	2	3,3	?	WBGene00021208;WBGene00006997	Y18H1A.2a;ZK546.1d	CEOP1014;CEOP2690
TSPOP465	2	2	0	0		?	WBGene00002228;WBGene00012739	C06G3.2;Y40B1B.7	NA;NA
TSPOP466	1	1	0	0		?	WBGene00016456	C35E7.4	NA
TSPOP467	2	2	2	2	2,5	?	WBGene00017286;WBGene00007201	F09E5.8;B0564.1a	CEOP2164;CEOP4532
TSPOP47	2	2	2	2	2,2	?	WBGene00018513;WBGene00011776	F46F11.10;T14G10.7	CEOP1272;CEOP4356
TSPOP470	1	1	0	0		?	WBGene00000100	C25A11.4m	NA
TSPOP471	2	2	1	1	4	1,NA	WBGene00006946;WBGene00017922	C34E10.4b;F29B9.7	CEOP3268;NA
TSPOP472	1	1	1	1	5	?	WBGene00001823	ZC395.7	CEOP3272
TSPOP473	2	2	0	0		?	WBGene00011280;WBGene00015286	R74.6;C01B12.3	NA;NA
TSPOP474	2	2	1	1	2	1,NA	WBGene00001233;WBGene00011802	T16G1.11;T16G1.9	CEOP5376;NA
TSPOP475	2	1	1	1	4	?	WBGene00017889	F28B3.10	CEOP1208
TSPOP476	2	2	2	2	4,2	?	WBGene00006946;WBGene00012714	C34E10.4b;Y39E4B.1	CEOP3268;CEOP3819
TSPOP477	2	2	2	1	3	identical	WBGene00008006;WBGene00008008	C38D4.5b;C38D4.9	CEOP3220;CEOP3220
TSPOP478	1	1	0	0		?	WBGene00003412	F20B6.3	NA
TSPOP479	2	2	2	2	4,3	?	WBGene00000838;WBGene00022759	Y108G3AL.1b;ZK546.2b	CEOP5588;CEOP2690
TSPOP48	2	2	2	2	5,2	?	WBGene00016375;WBGene00014938	C33H5.8;Y62E10A.11	CEOP4252;CEOP4548
TSPOP480	1	1	1	1	3	?	WBGene00010130	F55H2.2	CEOP3880
TSPOP481	2	2	2	2	2,2	?	WBGene00000940;WBGene00013997	Y113G7A.9a;ZK550.3	CEOP5500;CEOP4600
TSPOP482	2	2	2	2	6,3	?	WBGene00020110;WBGene00015353	R151.7b;C02F5.13	CEOP3424;CEOP3496
TSPOP49	2	2	2	2	3,3	?	WBGene00006392;WBGene00015793	K03B4.3a;C15C7.7	CEOP5060;CEOPX040
TSPOP5	3	3	2	2	3,2	?	WBGene00008364;WBGene00007752;WBGene00012927	D1046.3;C26H9A.2d;Y47D3A.14	CEOP4316;CEOP4654;NA
TSPOP50	2	2	1	1	2	1,NA	WBGene00011941;WBGene00010033	T23B5.4a;F54B11.10	CEOP4654;NA
TSPOP51	4	3	2	2	4,3	?	WBGene00011860;WBGene00004424;WBGene00006393	T20D3.8;JC8.3a;F48D6.1	CEOP4328;CEOP4535;NA
TSPOP52	2	2	1	1	4	1,NA	WBGene00007616;WBGene00007882	C15H11.8;C33A12.3a	CEOP5416;NA
TSPOP53	2	1	0	0		?	WBGene00006460;WBGene00006460	F25D1.1c;F25D1.1b	NA;NA
TSPOP54	2	2	2	2	3,3	?	WBGene00019822;WBGene00021515	R02D3.4b;Y41D4B.12a	CEOP4008;CEOP4047
TSPOP55	2	2	0	0		?	WBGene00016913;WBGene00045242	C54D1.5;C05B5.11	NA;NA
TSPOP56	2	1	0	0		?	WBGene00003849	T01C4.2b	NA
TSPOP57	2	2	2	2	3,6	?	WBGene00013376;WBGene00015238	Y62E10A.6;B0511.13b	CEOP4540;CEOP1632
TSPOP58	2	2	2	2	2,3	?	WBGene00016740;WBGene00017999	C48B6.2;F33D4.7	CEOP1356;CEOP4240
TSPOP59	2	1	1	1	5	?	WBGene00044325	C33H5.19	CEOP4252
TSPOP6	2	2	1	1	4	1,NA	WBGene00013462;WBGene00018740	Y67H2A.4d;F53B3.1	CEOP4538;NA
TSPOP60	2	2	2	2	2,2	?	WBGene00013176;WBGene00020215	Y53F4B.39a;T04G9.4	CEOP2660;CEOPX147
TSPOP61	5	5	3	3	2,2,2	?	WBGene00021715;WBGene00018723;WBGene00000764;WBGene00001808;WBGene00004482	Y49F6B.2;F53A3.7;T03F1.2;T10G3.6a;C16A3.9	CEOP2108;CEOP3845;CEOP1124;NA;NA
TSPOP62	2	2	0	0		?	WBGene00006760;WBGene00013198	H14N18.1b;Y54E5A.2	NA;NA
TSPOP63	2	2	0	0		?	WBGene00023409;WBGene00022173	C27A12.10;Y71H2AM.8	NA;NA
TSPOP64	2	2	1	1	2	1,NA	WBGene00007588;WBGene00020365	C14C10.5b;T08G2.2	CEOP5574;NA
TSPOP65	2	2	1	1	4	1,NA	WBGene00001093;WBGene00022004	T12E12.4b;Y59H11AL.1b	CEOP4168;NA
TSPOP66	2	2	2	1	3	reversed	WBGene00011123;WBGene00011122	R07H5.3c;R07H5.2a	CEOP4424;CEOP4424
TSPOP67	2	2	0	0		?	WBGene00006696;WBGene00003062	Y39B6A.19a;K09H9.6	NA;NA
TSPOP69	2	2	0	0		?	WBGene00022172;WBGene00003008	Y71H2AM.7;Y54G2A.1	NA;NA
TSPOP7	2	2	1	1	2	1,NA	WBGene00001999;WBGene00002266	F42A6.7a;ZK892.1b	CEOP4080;NA
TSPOP70	3	3	2	2	5,6	?	WBGene00013678;WBGene00044310;WBGene00020471	Y105E8A.20b;H20J04.9;T13B5.3	CEOP1736;CEOP2124;NA
TSPOP71	2	1	0	0		?	WBGene00020437	T12A2.2	NA
TSPOP72	3	3	2	2	2,4	?	WBGene00015159;WBGene00016392;WBGene00043705	B0361.5b;C34B2.7;Y55F3AM.7a	CEOP3833;CEOP1636;NA
TSPOP73	2	2	2	1	2	identical	WBGene00004759;WBGene00008452	F45D3.5;E02A10.1	CEOP5356;CEOP5356
TSPOP74	2	1	0	0		?	WBGene00018547	F47C12.2	NA
TSPOP75	2	2	1	1	2	1,NA	WBGene00001366;WBGene00004276	C33D9.1c;K09A9.2	CEOP4610;NA
TSPOP76	2	2	1	1	2	1,NA	WBGene00011687;WBGene00018833	T10C6.5;F54F2.5a	CEOP5452;NA
TSPOP77	2	1	1	1	6	?	WBGene00020113	R151.10	CEOP3424
TSPOP78	2	1	0	0		?	WBGene00006368	C54H2.1a	NA
TSPOP79	2	2	1	1	8	1,NA	WBGene00012996;WBGene00006512	Y48C3A.16;F18E2.2	CEOP2606;NA
TSPOP8	2	2	2	1	3	identical	WBGene00008006;WBGene00008008	C38D4.5a;C38D4.9	CEOP3220;CEOP3220
TSPOP80	2	2	1	1	2	1,NA	WBGene00002986;WBGene00007007	C07H6.1;C44C8.6	CEOP3849;NA
TSPOP81	2	2	0	0		?	WBGene00014086;WBGene00000520	ZK809.3;R07E5.8a	NA;NA
TSPOP82	3	2	0	0		?	WBGene00009882;WBGene00001177	F49C12.13;B0348.4y	NA;NA
TSPOP83	4	4	1	1	2	1,NA,NA,NA	WBGene00001590;WBGene00019898;WBGene00006853;WBGene00008586	C45G3.3;R05G6.4;C47G2.2;F08G12.2	CEOP1986;NA;NA;NA
TSPOP84	2	1	1	1	2	?	WBGene00004031	T13F2.3b	CEOP4624
TSPOP85	2	1	1	1	2	?	WBGene00013144	Y53C12B.2	CEOP2452
TSPOP86	2	2	0	0		?	WBGene00007022;WBGene00012626	ZK970.3;Y38H6C.14	NA;NA
TSPOP87	2	2	1	1	2	1,NA	WBGene00044077;WBGene00045237	T18H9.7a;F39H2.5	CEOP5220;NA
TSPOP88	2	2	1	1	4	1,NA	WBGene00006349;WBGene00021416	F39B2.4a;Y38F2AL.2	CEOP1760;NA
TSPOP89	2	1	0	0		?	WBGene00004077	W10C8.2	NA
TSPOP9	2	2	1	1	3	1,NA	WBGene00004326;WBGene00012917	T20G5.11;Y46G5A.29	CEOP3660;NA
TSPOP90	2	2	0	0		?	WBGene00011286;WBGene00003813	R90.4;C08B11.4	NA;NA
TSPOP91	2	1	0	0		?	WBGene00006452;WBGene00006452	R148.6;R148.6	NA;NA
TSPOP92	3	3	0	0		?	WBGene00002162;WBGene00004979;WBGene00021281	F42G8.12;F42G8.11;Y24D9A.1a	NA;NA;NA
TSPOP93	2	2	2	2	3,4	?	WBGene00013406;WBGene00011634	Y63D3A.7;T09A5.5	CEOP1731;CEOP2312
TSPOP94	3	2	0	0		?	WBGene00011887;WBGene00010812	T21B10.5a;M01F1.6	NA;NA
TSPOP95	2	2	1	1	3	1,NA	WBGene00013587;WBGene00004188	Y80D3A.9;W07E6.4	CEOP5476;NA
TSPOP96	2	2	2	2	2,2	?	WBGene00000181;WBGene00000962	F01G4.2a;T21E12.4b	CEOP4412;CEOP1994
TSPOP97	2	1	0	0		?	WBGene00012814	Y43F8B.3b	NA
TSPOP98	2	2	0	0		?	WBGene00007938;WBGene00012814	C34F6.1;Y43F8B.3h	NA;NA
TSPOP99	2	1	0	0		?	WBGene00018468	F45E4.3e	NA

## Sheet: BR8u
T. spiralis operon	Genes	Homologous C. elegans genes	Homologous C. elegans operonic genes	C. elegans operons	C. elegans operon sizes	Synteny	C. elegans gene IDs	C. elegans gene names	C. elegans operon IDs
TSPOP1	2	1	1	1	8	?	WBGene00021655	Y48A5A.1	CEOP4052
TSPOP10	2	2	1	1	2	1,NA	WBGene00007668;WBGene00012717	C18B12.6;Y39E4B.6b	CEOPX132;NA
TSPOP100	2	2	1	1	2	1,NA	WBGene00021956;WBGene00016442	Y57E12AL.1a;C35D10.5	CEOP5534;NA
TSPOP101	2	2	2	1	4	reversed	WBGene00013464;WBGene00000818	Y67H2A.7a;Y67H2A.6b	CEOP4538;CEOP4538
TSPOP102	2	1	1	1	3	?	WBGene00044025	T01G1.4	CEOP4639
TSPOP103	2	2	0	0		?	WBGene00044631;WBGene00012916	F55A11.5;Y46G5A.28	NA;NA
TSPOP104	2	2	2	1	2	identical	WBGene00021421;WBGene00021423	Y38F2AR.3a;Y38F2AR.5b	CEOP4060;CEOP4060
TSPOP105	2	2	2	2	2,2	?	WBGene00006497;WBGene00021934	F10G7.1;Y55F3AR.3a	CEOP2132;CEOP4046
TSPOP106	2	2	2	2	2,4	?	WBGene00001635;WBGene00001860	Y45F10D.3b;F28B3.7a	CEOP4560;CEOP1208
TSPOP107	2	2	2	2	2,3	?	WBGene00009084;WBGene00006607	F23B12.7;F57B10.7	CEOP5420;CEOP1336
TSPOP108	2	2	2	2	6,6	?	WBGene00019163;WBGene00006489	H06H21.6;ZK856.9	CEOP4152;CEOP5248
TSPOP109	2	2	2	1	3	reversed	WBGene00017121;WBGene00004432	E04A4.7;E04A4.8	CEOP4148;CEOP4148
TSPOP11	2	2	2	2	2,4	?	WBGene00006701;WBGene00008664	C35B1.1;F10G8.6	CEOP4112;CEOP1584
TSPOP110	2	1	1	1	2	?	WBGene00010304	F59A2.4a	CEOP3108
TSPOP111	2	2	2	2	2,6	?	WBGene00002891;WBGene00019503	C56G2.6a;K07H8.1	CEOP3870;CEOP4280
TSPOP112	2	2	1	1	2	1,NA	WBGene00001983;WBGene00009131	E04A4.4b;F25H8.1b	CEOP4144;NA
TSPOP113	2	1	0	0		?	WBGene00044637	Y47D7A.16a	NA
TSPOP114	2	2	0	0		?	WBGene00016935;WBGene00003153	C54G7.4;Y67D8C.10e	NA;NA
TSPOP115	2	2	2	2	3,3	?	WBGene00007020;WBGene00007387	Y104H12D.1a;C06H2.3a	CEOP4049;CEOP5276
TSPOP116	2	2	0	0		?	WBGene00014095;WBGene00010134	ZK829.4;F55H12.3	NA;NA
TSPOP117	2	2	0	0		?	WBGene00016844;WBGene00000170	C50F7.4;C01G6.1b	NA;NA
TSPOP118	2	1	1	1	2	?	WBGene00021888	Y54G2A.23	CEOP4072
TSPOP119	2	2	0	0		?	WBGene00008281;WBGene00013455	C53D6.4b;Y67A10A.6c	NA;NA
TSPOP12	2	2	0	0		?	WBGene00002393;WBGene00017046	Y65B4BR.2a;D2021.1a	NA;NA
TSPOP120	3	3	0	0		?	WBGene00008729;WBGene00003963;WBGene00001007	F13B12.1;C07A12.4a;C39E9.14a	NA;NA;NA
TSPOP121	2	2	2	2	4,2	?	WBGene00022456;WBGene00017928	Y110A7A.6b;F29C4.6	CEOP1220;CEOP4004
TSPOP122	2	2	0	0		?	WBGene00022232;WBGene00010741	Y73B6BL.3;K10D6.1	NA;NA
TSPOP123	2	1	0	0		?	WBGene00001169;WBGene00001169	R03G5.1d;R03G5.1a	NA;NA
TSPOP124	2	2	1	1	3	1,NA	WBGene00013378;WBGene00019899	Y62E10A.10;R05G6.5	CEOP4544;NA
TSPOP125	2	2	0	0		?	WBGene00010722;WBGene00020517	K09E4.4;T15B7.2	NA;NA
TSPOP126	2	2	2	2	3,4	?	WBGene00007111;WBGene00000761	B0035.12;C24A11.9	CEOP4440;CEOP1248
TSPOP127	2	2	0	0		?	WBGene00044362;WBGene00007880	F42G2.7a;C33A12.1	NA;NA
TSPOP128	2	2	2	2	2,2	?	WBGene00009829;WBGene00003407	F47G9.1;F57C12.5c	CEOP5522;CEOPX154
TSPOP129	2	1	0	0		?	WBGene00022861	ZK1193.5e	NA
TSPOP13	2	2	2	2	2,3	?	WBGene00022793;WBGene00012966	ZK686.3;Y48A6B.5	CEOP3452;CEOP3712
TSPOP130	2	2	1	1	2	1,NA	WBGene00016374;WBGene00002140	C33H5.7;C18H7.2b	CEOP4248;NA
TSPOP131	2	2	2	2	1,4	?	WBGene00022434;WBGene00006724	Y108G3AL.2;C08B11.7	CEOP5006;CEOP2328
TSPOP132	2	2	2	2	3,3	?	WBGene00022121;WBGene00007645	Y71F9AM.4a;C17E4.6	CEOP1076;CEOP1544
TSPOP133	2	2	0	0		?	WBGene00006772;WBGene00011436	C50C3.9c;T04F3.1a	NA;NA
TSPOP134	2	2	2	1	3	identical	WBGene00003594;WBGene00013239	Y56A3A.13;Y56A3A.22	CEOP3744;CEOP3744
TSPOP135	2	2	2	2	3,2	?	WBGene00022381;WBGene00022380	Y94H6A.9a;Y94H6A.8	CEOP4665;CEOP4068
TSPOP136	2	2	1	1	2	1,NA	WBGene00020030;WBGene00016534	R12E2.1;C39D10.7	CEOP1148;NA
TSPOP137	2	2	1	1	2	1,NA	WBGene00011451;WBGene00017534	T04H1.5;F17A9.2	CEOP5336;NA
TSPOP138	2	2	0	0		?	WBGene00017037;WBGene00017765	D1069.3b;F25B4.1	NA;NA
TSPOP139	2	2	1	1	3	1,NA	WBGene00044329;WBGene00018281	F11A10.8;F41D9.1	CEOP4490;NA
TSPOP14	2	2	2	1	6	reversed	WBGene00020422;WBGene00006736	T10F2.2;T10F2.3	CEOP3260;CEOP3260
TSPOP140	2	2	1	1	2	1,NA	WBGene00006918;WBGene00000295	ZK970.4;W01C8.6b	CEOP2476;NA
TSPOP141	2	2	1	1	2	1,NA	WBGene00004494;WBGene00022416	K02B2.5;Y102A11A.6	CEOP4611;NA
TSPOP142	2	2	2	2	6,2	?	WBGene00020109;WBGene00022471	R151.6;Y119C1B.5	CEOP3424;CEOP1947
TSPOP143	2	2	2	1	5	reversed	WBGene00023422;WBGene00009648	F43C1.6;F43C1.3	CEOP3164;CEOP3164
TSPOP144	2	2	2	2	3,2	?	WBGene00003162;WBGene00008769	F20H11.3;F13G3.11	CEOP3392;CEOP1392
TSPOP145	2	2	2	1	3	identical	WBGene00006768;WBGene00014027	ZK637.8f;ZK637.9b	CEOP3556;CEOP3556
TSPOP146	2	1	1	1	3	?	WBGene00006540	F58A4.8	CEOP3608
TSPOP147	2	1	0	0		?	WBGene00001281	F10B5.6	NA
TSPOP148	2	2	0	0		?	WBGene00008345;WBGene00219217	C56A3.6c;C08F8.15	NA;NA
TSPOP149	2	1	1	1	2	?	WBGene00002002	K08E7.2	CEOP4520
TSPOP15	2	2	2	2	3,2	?	WBGene00021133;WBGene00011144	W10D9.5a;R08D7.4b	CEOP2686;CEOP3560
TSPOP150	2	2	1	1	3	1,NA	WBGene00008684;WBGene00004228	F11A10.3a;R09H10.4	CEOP4490;NA
TSPOP151	3	2	1	1	7	1,NA	WBGene00009735;WBGene00022801	F45G2.9;ZK688.6a	CEOP3792;NA
TSPOP152	2	2	0	0		?	WBGene00003999;WBGene00011910	C05A9.1a;T22B3.2a	NA;NA
TSPOP153	2	2	1	1	2	1,NA	WBGene00020092;WBGene00012529	R144.2a;Y32F6A.4	CEOP3868;NA
TSPOP154	2	2	0	0		?	WBGene00002217;WBGene00006620	F56E3.3c;C07G1.1	NA;NA
TSPOP155	2	1	1	1	2	?	WBGene00000247	T19E7.3a	CEOP4172
TSPOP156	2	2	1	1	2	1,NA	WBGene00017734;WBGene00020216	F23C8.5a;T04G9.5	CEOP1044;NA
TSPOP157	2	2	0	0		?	WBGene00008220;WBGene00012342	C50B6.7;W08D2.7	NA;NA
TSPOP158	2	2	1	1	2	1,NA	WBGene00004430;WBGene00019492	Y45F10D.12;K07E3.4b	CEOP4560;NA
TSPOP159	2	2	1	1	3	1,NA	WBGene00015487;WBGene00003047	C05D11.10;T03F6.5	CEOP3372;NA
TSPOP16	3	3	1	1	2	1,NA,NA	WBGene00011144;WBGene00010925;WBGene00006727	R08D7.4b;M153.2;F25B5.4a	CEOP3560;NA;NA
TSPOP160	2	2	0	0		?	WBGene00012600;WBGene00001793	Y38E10A.22a;Y46G5A.31	NA;NA
TSPOP161	2	2	0	0		?	WBGene00022785;WBGene00018867	ZK652.6a;F55A12.10	NA;NA
TSPOP162	2	2	0	0		?	WBGene00020276;WBGene00003802	T05H4.15c;Y56A3A.17	NA;NA
TSPOP163	2	2	1	1	4	1,NA	WBGene00004095;WBGene00003975	F52C9.8f;T28D6.9	CEOP3284;NA
TSPOP164	2	2	1	1	2	1,NA	WBGene00009341;WBGene00012258	F32H2.4;W04G3.5a	CEOP1520;NA
TSPOP165	2	2	0	0		?	WBGene00022798;WBGene00008749	ZK688.3;F13E6.5	NA;NA
TSPOP166	2	2	1	1	2	1,NA	WBGene00018409;WBGene00001579	F44B9.8;F56A11.1	CEOP3472;NA
TSPOP168	2	1	1	1	2	?	WBGene00021021	W04B5.4	CEOP3076
TSPOP169	2	2	0	0		?	WBGene00019498;WBGene00018208	K07E8.7a;F39G3.3	NA;NA
TSPOP17	2	2	2	2	1,2	?	WBGene00302986;WBGene00013317	Y37E11AM.4;Y57G11C.22a	CEOP5604;CEOP4661
TSPOP170	2	1	0	0		?	WBGene00016400	C34D4.4	NA
TSPOP171	2	2	1	1	2	1,NA	WBGene00002185;WBGene00002005	T27E9.4a;F26D10.3	CEOP3800;NA
TSPOP172	2	2	1	1	6	1,NA	WBGene00020636;WBGene00022664	T20H4.5;ZK121.2	CEOP3424;NA
TSPOP173	2	2	1	1	3	1,NA	WBGene00017981;WBGene00020687	F32D1.1a;T22D1.10	CEOP5052;NA
TSPOP174	2	1	0	0		?	WBGene00003020	C32F10.2	NA
TSPOP175	2	2	1	1	3	1,NA	WBGene00010230;WBGene00019082	F58A4.9;F59A3.9	CEOP3608;NA
TSPOP176	2	2	1	1	3	1,NA	WBGene00010479;WBGene00010485	K01G5.8a;K01H12.2	CEOP3700;NA
TSPOP177	3	3	1	1	3	1,NA,NA	WBGene00016990;WBGene00006786;WBGene00010283	CD4.4;Y60A3A.1;F58G11.6	CEOP5076;NA;NA
TSPOP178	2	2	0	0		?	WBGene00006786;WBGene00010283	Y60A3A.1;F58G11.6	NA;NA
TSPOP179	2	2	1	1	2	1,NA	WBGene00022599;WBGene00020088	ZC395.10;R119.2	CEOP3276;NA
TSPOP180	2	1	0	0		?	WBGene00007904	C33G3.4	NA
TSPOP181	2	2	1	1	3	1,NA	WBGene00012645;WBGene00019199	Y39A1A.6;H14E04.2b	CEOP3688;NA
TSPOP182	2	2	1	1	2	1,NA	WBGene00009284;WBGene00002071	F31C3.2b;T04G9.3	CEOP1965;NA
TSPOP183	2	2	1	1	2	1,NA	WBGene00017547;WBGene00004762	F18A1.6b;F35G12.3a	CEOP2668;NA
TSPOP184	2	2	0	0		?	WBGene00001329;WBGene00016311	T04C10.2a;C32D5.3	NA;NA
TSPOP185	3	3	1	1	2	1,NA,NA	WBGene00006840;WBGene00005674;WBGene00002008	R05D3.7;Y45F10B.6;F43E2.8a	CEOP3512;NA;NA
TSPOP186	2	1	1	1	2	?	WBGene00015133	B0303.15	CEOP3538
TSPOP187	2	2	0	0		?	WBGene00020397;WBGene00020160	T10B11.1;T02C5.3b	NA;NA
TSPOP188	2	2	0	0		?	WBGene00021074;WBGene00002179	W07E6.2a;T22C1.7	NA;NA
TSPOP189	2	2	1	1	2	1,NA	WBGene00013209;WBGene00019227	Y54G9A.6;H22K11.4a	CEOP2618;NA
TSPOP190	2	2	1	1	3	1,NA	WBGene00016754;WBGene00015168	C48E7.11;B0403.4	CEOP1316;NA
TSPOP191	2	2	1	1	2	1,NA	WBGene00006729;WBGene00006816	K07B1.3;F54B11.3a	CEOP5224;NA
TSPOP192	2	2	2	1	3	reversed	WBGene00023450;WBGene00011730	T12D8.10;T12D8.2	CEOP3818;CEOP3818
TSPOP193	2	2	1	1	2	1,NA	WBGene00022697;WBGene00009288	ZK353.1a;F31C3.6a	CEOP3522;NA
TSPOP194	2	2	1	1	2	1,NA	WBGene00012768;WBGene00006634	Y41E3.10b;F33C8.3	CEOP4685;NA
TSPOP195	2	1	0	0		?	WBGene00013042;WBGene00013042	Y49E10.23a;Y49E10.23b	NA;NA
TSPOP196	2	2	1	1	2	1,NA	WBGene00001233;WBGene00011802	T16G1.11;T16G1.9	CEOP5376;NA
TSPOP197	2	1	0	0		?	WBGene00010488;WBGene00010488	K02A11.3;K02A11.3	NA;NA
TSPOP198	2	2	2	2	3,2	?	WBGene00010325;WBGene00021844	F59C6.4;Y54E10BR.5	CEOP1616;CEOP1924
TSPOP199	2	2	2	2	3,4	?	WBGene00022188;WBGene00010615	Y71H2AR.1;K07A1.9f	CEOP3086;CEOP1552
TSPOP2	2	2	1	1	4	1,NA	WBGene00012641;WBGene00018793	Y39A1A.1c;F54C4.1	CEOP3684;NA
TSPOP20	2	2	0	0		?	WBGene00044121;WBGene00009098	C35C5.11;F25B3.1	NA;NA
TSPOP200	2	2	0	0		?	WBGene00002203;WBGene00006747	F46F2.2e;R07D5.1j	NA;NA
TSPOP201	2	1	2	1	2	1,1	WBGene00013803;WBGene00013803	Y116A8C.26a;Y116A8C.26b	CEOP4632;CEOP4632
TSPOP202	2	2	1	1	4	1,NA	WBGene00008667;WBGene00007969	F10G8.9b;C36A4.9b	CEOP1584;NA
TSPOP203	2	1	0	0		?	WBGene00010909	M88.7	NA
TSPOP204	2	2	0	0		?	WBGene00006780;WBGene00002977	B0350.2e;Y105E8A.7b	NA;NA
TSPOP205	2	2	1	1	2	1,NA	WBGene00020391;WBGene00022855	T10B5.5b;ZK1127.9b	CEOP5560;NA
TSPOP206	2	2	2	2	3,2	?	WBGene00007021;WBGene00011274	C24H11.6;R53.5	CEOP3831;CEOP2734
TSPOP207	2	2	0	0		?	WBGene00004180;WBGene00000875	F58A4.4a;K08E3.6	NA;NA
TSPOP208	2	2	1	1	4	1,NA	WBGene00007617;WBGene00016015	C15H11.9;C23G10.8	CEOP5416;NA
TSPOP209	2	1	0	0		?	WBGene00017758	F23H11.2	NA
TSPOP21	2	2	1	1	3	1,NA	WBGene00011773;WBGene00011775	T14G10.3;T14G10.5d	CEOP4619;NA
TSPOP210	2	2	2	1	2	reversed	WBGene00016249;WBGene00004460	C30C11.1;C30C11.2	CEOP3528;CEOP3528
TSPOP211	2	2	1	1	3	1,NA	WBGene00018131;WBGene00021738	F37A4.1;Y50D4A.4a	CEOP3400;NA
TSPOP212	2	2	0	0		?	WBGene00016469;WBGene00010403	C36B7.6;H19J13.1	NA;NA
TSPOP213	2	1	1	1	2	?	WBGene00015160	B0361.6	CEOP3833
TSPOP214	2	2	0	0		?	WBGene00017673;WBGene00014205	F21F3.3;ZK1058.5	NA;NA
TSPOP215	2	1	0	0		?	WBGene00008882	F16B12.6	NA
TSPOP216	2	2	1	1	2	1,NA	WBGene00000536;WBGene00017010	ZC395.2;D1007.15a	CEOP3280;NA
TSPOP217	2	2	1	1	4	1,NA	WBGene00015809;WBGene00021815	C16A3.4;Y53G8AR.8	CEOP3364;NA
TSPOP218	2	2	2	2	2,2	?	WBGene00022192;WBGene00014218	Y71H2B.2;ZK1098.1a	CEOP3853;CEOP3596
TSPOP219	2	2	1	1	2	1,NA	WBGene00013237;WBGene00016508	Y56A3A.19;C37H5.5	CEOP3738;NA
TSPOP22	2	1	1	1	6	?	WBGene00009771	F46B6.6a	CEOP5236
TSPOP220	2	2	1	1	2	1,NA	WBGene00010757;WBGene00016503	K10G9.3b;C37C3.11	CEOP3890;NA
TSPOP221	3	3	2	1	2	1,2,NA	WBGene00003882;WBGene00010333;WBGene00007186	F59E10.1;F59E10.3;B0464.6	CEOP2508;CEOP2508;NA
TSPOP222	3	3	2	2	2,3	?	WBGene00021311;WBGene00019301;WBGene00003593	Y32H12A.2a;K02D10.1b;F42A10.2c	CEOP3292;CEOP3540;NA
TSPOP223	2	2	1	1	5	1,NA	WBGene00010809;WBGene00004255	M01F1.3;T20G5.5	CEOP3124;NA
TSPOP224	2	1	0	0		?	WBGene00000532	C07H4.2	NA
TSPOP225	2	2	2	2	2,2	?	WBGene00015648;WBGene00015173	C09F5.2a;B0412.3a	CEOP3859;CEOP3036
TSPOP226	2	2	1	1	3	1,NA	WBGene00010476;WBGene00003033	K01G5.1;F34D10.5	CEOP3701;NA
TSPOP227	4	4	3	2	2,5	?	WBGene00006755;WBGene00001660;WBGene00001661;WBGene00020443	ZK1098.10a;C34E10.3;C34E10.2;T12A2.15a	CEOP3830;CEOP3272;CEOP3272;NA
TSPOP228	2	2	1	1	3	1,NA	WBGene00006515;WBGene00015104	C05D11.3;B0280.9	CEOP3376;NA
TSPOP229	3	3	2	2	2,3	?	WBGene00022166;WBGene00022167;WBGene00006484	Y71H2AM.1;Y71H2AM.2;F08A8.6	CEOP5632;CEOP3086;NA
TSPOP23	2	2	2	1	5	identical	WBGene00022852;WBGene00195239	ZK1127.5;ZK1127.13	CEOP2280;CEOP2280
TSPOP230	2	1	1	1	3	?	WBGene00007013	Y62F5A.1b	CEOP2552
TSPOP231	2	2	1	1	2	1,NA	WBGene00020268;WBGene00002079	T05H4.5;Y48G1A.5a	CEOP5112;NA
TSPOP232	2	2	1	1	2	1,NA	WBGene00020268;WBGene00002079	T05H4.5;Y48G1A.5a	CEOP5112;NA
TSPOP233	2	2	1	1	2	1,NA	WBGene00012187;WBGene00001166	W01G7.3;ZK328.2	CEOP2624;NA
TSPOP234	2	2	1	1	2	1,NA	WBGene00007912;WBGene00017963	C34B7.2;F31F4.17	CEOP1464;NA
TSPOP235	2	2	1	1	3	1,NA	WBGene00022402;WBGene00006780	Y97E10AR.7;B0350.2h	CEOP5172;NA
TSPOP236	2	2	1	1	2	1,NA	WBGene00022576;WBGene00009966	ZC250.2;F53B7.3	CEOP5084;NA
TSPOP237	2	2	1	1	2	1,NA	WBGene00010279;WBGene00000433	F58G11.1b;ZK265.4a	CEOP5398;NA
TSPOP238	2	2	1	1	2	1,NA	WBGene00004497;WBGene00020835	Y41D4B.5;T27A1.3b	CEOP4640;NA
TSPOP239	2	2	2	2	2,3	?	WBGene00021350;WBGene00019460	Y37E3.8a;K06H7.9	CEOP1032;CEOP3480
TSPOP24	2	2	0	0		?	WBGene00015926;WBGene00009226	C17H11.6b;F28G4.1	NA;NA
TSPOP240	2	2	2	2	3,3	?	WBGene00003059;WBGene00004479	C48E7.3;D1007.6	CEOP1316;CEOP1184
TSPOP241	2	1	0	0		?	WBGene00003417	Y41C4A.14	NA
TSPOP242	2	2	1	1	3	1,NA	WBGene00016754;WBGene00014224	C48E7.11;ZK1098.7	CEOP1316;NA
TSPOP243	2	1	0	0		?	WBGene00007972	C36B1.5	NA
TSPOP244	2	2	1	1	2	1,NA	WBGene00021363;WBGene00012550	Y37E11AL.8;Y37D8A.10	CEOP4653;NA
TSPOP245	2	2	0	0		?	WBGene00018872;WBGene00010496	F55C12.5a;K02B12.3	NA;NA
TSPOP246	2	2	2	2	1,4	?	WBGene00016427;WBGene00017293	C34H4.5a;F09E5.17	CEOP4631;CEOP2168
TSPOP247	2	2	0	0		?	WBGene00008860;WBGene00000377	F15D4.3;T05C12.7	NA;NA
TSPOP248	2	2	0	0		?	WBGene00006309;WBGene00013189	D1014.1;Y54E2A.4b	NA;NA
TSPOP249	2	2	0	0		?	WBGene00017178;WBGene00013702	F02E8.5;Y106G6D.6	NA;NA
TSPOP25	2	2	2	2	3,2	?	WBGene00022803;WBGene00006728	ZK688.9;ZK1010.1	CEOP3462;CEOP3768
TSPOP250	2	1	0	0		?	WBGene00007059	F08C6.3	NA
TSPOP251	2	2	0	0		?	WBGene00004377;WBGene00006856	F49E7.1a;C13B4.2	NA;NA
TSPOP252	2	2	1	1	2	1,NA	WBGene00020417;WBGene00008920	T10E9.7;F17C11.9a	CEOP1326;NA
TSPOP253	2	2	0	0		?	WBGene00007959;WBGene00000774	C35C5.10a;F56A8.6	NA;NA
TSPOP254	2	2	1	1	2	1,NA	WBGene00001151;WBGene00004488	F38H4.8a;T05F1.3	CEOP4660;NA
TSPOP255	2	2	2	2	2,3	?	WBGene00002363;WBGene00011722	F38H4.9;T11G6.8a	CEOP4480;CEOP4396
TSPOP256	2	2	0	0		?	WBGene00000497;WBGene00002069	F48A11.1c;C04F12.3	NA;NA
TSPOP257	2	1	0	0		?	WBGene00015425	C04E6.11	NA
TSPOP258	2	2	0	0		?	WBGene00011511;WBGene00003084	T05H10.7b;R160.7	NA;NA
TSPOP259	3	3	2	1	6	1,2,NA	WBGene00013804;WBGene00013807;WBGene00010386	Y116A8C.27a;Y116A8C.30a;H12D21.10a	CEOP4596;CEOP4596;NA
TSPOP26	2	2	2	2	2,3	?	WBGene00003583;WBGene00007101	EEED8.8;B0024.11	CEOP2743;CEOP5252
TSPOP260	2	1	0	0		?	WBGene00001559	F45H7.2d	NA
TSPOP261	2	2	1	1	2	1,NA	WBGene00013236;WBGene00000800	Y56A3A.18;Y23H5A.7c	CEOP3740;NA
TSPOP262	2	2	1	1	2	1,NA	WBGene00017919;WBGene00016611	F29B9.1;C43G2.2b	CEOP4136;NA
TSPOP263	2	2	1	1	4	1,NA	WBGene00006931;WBGene00000302	T20D3.7b;C56A3.7c	CEOP4328;NA
TSPOP264	2	2	1	1	2	1,NA	WBGene00022056;WBGene00015913	Y67D2.6;C17F4.7	CEOP3860;NA
TSPOP265	2	2	1	1	3	1,NA	WBGene00009992;WBGene00000478	F53F4.10;F27E11.3	CEOP5392;NA
TSPOP266	2	2	1	1	2	1,NA	WBGene00011017;WBGene00018181	R04F11.5;F38E1.9	CEOP5344;NA
TSPOP267	2	2	0	0		?	WBGene00013093;WBGene00021292	Y51H1A.2e;Y25C1A.5	NA;NA
TSPOP268	2	2	1	1	2	1,NA	WBGene00013789;WBGene00002163	Y116A8C.9a;C54D1.3c	CEOP4592;NA
TSPOP269	2	2	0	0		?	WBGene00009145;WBGene00003411	F26A3.7;F14F4.3	NA;NA
TSPOP27	2	2	0	0		?	WBGene00008029;WBGene00006619	C39E9.5;ZK546.15	NA;NA
TSPOP270	3	3	1	1	2	1,NA,NA	WBGene00022296;WBGene00018135;WBGene00019953	Y76B12C.2;F37A4.5;R08C7.10b	CEOP4056;NA;NA
TSPOP271	2	2	1	1	2	1,NA	WBGene00003582;WBGene00008430	F52G2.1c;D2085.5b	CEOP4556;NA
TSPOP272	2	1	1	1	3	?	WBGene00004431	C09D4.5	CEOP1252
TSPOP273	2	1	0	0		?	WBGene00017241	F08C6.2b	NA
TSPOP274	2	2	2	1	2	reversed	WBGene00007114;WBGene00007113	B0035.16;B0035.15	CEOP4428;CEOP4428
TSPOP275	2	2	1	1	3	1,NA	WBGene00013434;WBGene00009211	Y66D12A.8a;F28D1.1	CEOP3723;NA
TSPOP276	2	2	2	2	2,2	?	WBGene00010725;WBGene00007026	K09E9.2;F32H2.2a	CEOPX156;CEOP1512
TSPOP277	2	1	0	0		?	WBGene00019148	H03E18.1	NA
TSPOP278	2	2	0	0		?	WBGene00009793;WBGene00003562	F46F6.2a;F09G8.4	NA;NA
TSPOP279	2	2	1	1	2	1,NA	WBGene00003064;WBGene00009460	R10H10.1;F36A2.13	CEOP4376;NA
TSPOP28	2	2	0	0		?	WBGene00021930;WBGene00021920	Y55F3AM.13;Y55F3AM.1	NA;NA
TSPOP280	2	2	0	0		?	WBGene00007179;WBGene00006836	B0457.4;C47E8.7	NA;NA
TSPOP281	2	2	1	1	2	1,NA	WBGene00018088;WBGene00007155	F36D4.2;B0379.1a	CEOP5228;NA
TSPOP282	2	2	1	1	2	1,NA	WBGene00015513;WBGene00017814	C06A8.2;F26A10.2	CEOP2731;NA
TSPOP283	2	2	0	0		?	WBGene00000911;WBGene00044732	C10C5.6b;T03G11.10	NA;NA
TSPOP284	2	2	1	1	4	1,NA	WBGene00013218;WBGene00012830	Y54G11A.9;Y43F8C.8	CEOP2636;NA
TSPOP285	2	2	0	0		?	WBGene00007260;WBGene00004854	C02C6.2a;F40E10.4	NA;NA
TSPOP286	2	1	1	1	2	?	WBGene00021348	Y37E3.4	CEOP1028
TSPOP287	2	2	0	0		?	WBGene00016406;WBGene00002031	C34D10.1;Y34B4A.3	NA;NA
TSPOP288	2	2	1	1	2	1,NA	WBGene00011239;WBGene00009920	R11A8.5;F52B5.1a	CEOP4372;NA
TSPOP289	2	2	0	0		?	WBGene00012337;WBGene00010699	W07G4.3;K08H10.9	NA;NA
TSPOP29	2	2	1	1	3	1,NA	WBGene00001497;WBGene00019928	T08B2.9b;R07C3.12	CEOP1312;NA
TSPOP290	2	2	1	1	4	1,NA	WBGene00018610;WBGene00017313	F48E8.3;F09G2.4	CEOP3304;NA
TSPOP291	2	2	2	2	2,2	?	WBGene00010037;WBGene00013332	F54C8.4a;Y57G11C.43	CEOP3580;CEOP4667
TSPOP292	2	2	2	2	3,3	?	WBGene00011067;WBGene00007760	R06F6.2;C27B7.2	CEOP2504;CEOP4312
TSPOP293	2	2	2	2	4,3	?	WBGene00000787;WBGene00017062	C41D11.8;D2063.3a	CEOP1180;CEOP5052
TSPOP294	2	1	0	0		?	WBGene00011834	T19B10.6	NA
TSPOP295	2	2	1	1	2	1,NA	WBGene00010231;WBGene00003394	F58B3.4;T07H6.2	CEOP4460;NA
TSPOP296	2	2	1	1	3	1,NA	WBGene00004205;WBGene00004446	F29B9.4c;T24B8.1a	CEOP4128;NA
TSPOP297	2	2	1	1	2	1,NA	WBGene00017360;WBGene00001650	F10E9.11;F25H8.3b	CEOP3504;NA
TSPOP298	3	3	3	2	2,3	?	WBGene00010993;WBGene00006369;WBGene00011334	R03E1.2;R03E1.1;T01E8.6	CEOPX128;CEOPX128;CEOP2472
TSPOP299	2	2	1	1	4	1,NA	WBGene00006446;WBGene00009200	F28F8.6;F28C1.1	CEOP5444;NA
TSPOP3	2	2	1	1	2	1,NA	WBGene00007528;WBGene00014215	C11H1.2;ZK1086.1b	CEOPX134;NA
TSPOP30	2	2	0	0		?	WBGene00010375;WBGene00001328	H09F14.1c;K08C7.3f	NA;NA
TSPOP300	2	2	0	0		?	WBGene00010459;WBGene00044773	K01C8.7a;C08A9.10	NA;NA
TSPOP301	2	2	1	1	4	1,NA	WBGene00021377;WBGene00019825	Y37E11B.5;R02D3.8	CEOP4100;NA
TSPOP302	2	1	1	1	2	?	WBGene00022281	Y74C10AR.3a	CEOP1920
TSPOP303	2	2	1	1	2	1,NA	WBGene00019333;WBGene00016331	K02F3.10;C32F10.1b	CEOP3040;NA
TSPOP304	2	2	1	1	2	1,NA	WBGene00004897;WBGene00000992	T10H9.4;F27D9.6	CEOP5128;NA
TSPOP306	3	3	2	1	5	1,2,NA	WBGene00019005;WBGene00019006;WBGene00012705	F57B10.8;F57B10.9;Y39C12A.3b	CEOP1332;CEOP1332;NA
TSPOP307	2	2	1	1	2	1,NA	WBGene00006434;WBGene00013668	F09E5.15c;Y105E8A.3	CEOP2745;NA
TSPOP308	2	2	2	1	3	reversed	WBGene00016622;WBGene00016621	C43H8.2;C43H8.1	CEOP1628;CEOP1628
TSPOP309	2	1	1	1	2	?	WBGene00013344	Y59A8B.7	CEOP5464
TSPOP31	2	2	1	1	2	1,NA	WBGene00000940;WBGene00018700	Y113G7A.9a;F52E1.13f	CEOP5500;NA
TSPOP310	2	2	0	0		?	WBGene00006876;WBGene00001534	ZK1151.1b;F52E1.4a	NA;NA
TSPOP311	2	2	0	0		?	WBGene00002123;WBGene00022171	C16E9.4b;Y71H2AM.6a	NA;NA
TSPOP312	2	1	0	0		?	WBGene00007479	C09F9.2	NA
TSPOP313	3	3	1	1	5	1,NA,NA	WBGene00015191;WBGene00009443;WBGene00022277	B0432.10;F35G12.7;Y74C9A.3	CEOP2020;NA;NA
TSPOP314	3	3	2	1	2	1,2,NA	WBGene00007189;WBGene00007194;WBGene00004790	B0491.1;B0491.7;F07H5.2	CEOP2532;CEOP2532;NA
TSPOP315	2	2	2	1	3	identical	WBGene00006919;WBGene00018512	F46F11.5;F46F11.9a	CEOP1264;CEOP1264
TSPOP316	2	2	0	0		?	WBGene00017066;WBGene00001209	D2092.5;C27D11.1	NA;NA
TSPOP317	2	2	2	1	3	identical	WBGene00009285;WBGene00009286	F31C3.3;F31C3.4	CEOP1776;CEOP1776
TSPOP318	2	1	0	0		?	WBGene00016002	C18H9.3c	NA
TSPOP319	2	2	0	0		?	WBGene00017098;WBGene00015125	E02D9.1c;B0303.3	NA;NA
TSPOP32	2	1	0	0		?	WBGene00007197	B0513.5a	NA
TSPOP320	2	2	1	1	3	1,NA	WBGene00000426;WBGene00004888	Y106G6E.5b;K12C11.2	CEOP1592;NA
TSPOP321	2	2	1	1	2	1,NA	WBGene00007009;WBGene00023407	Y65B4BR.4d;F56D1.6	CEOP1934;NA
TSPOP322	2	1	0	0		?	WBGene00009450;WBGene00009450	F35H8.6;F35H8.6	NA;NA
TSPOP323	2	2	2	1	4	reversed	WBGene00011058;WBGene00006958	R06C1.2;R06C1.3a	CEOP1660;CEOP1660
TSPOP324	2	2	1	1	2	1,NA	WBGene00001056;WBGene00016494	K02F2.1a;C37A2.8a	CEOP1999;NA
TSPOP325	2	1	1	1	4	?	WBGene00009556	F39B2.5	CEOP1760
TSPOP326	2	2	2	2	4,3	?	WBGene00011975;WBGene00008133	T24B1.1;C47B2.7b	CEOP1416;CEOP1786
TSPOP327	2	2	0	0		?	WBGene00017288;WBGene00011910	F09E5.10;T22B3.2b	NA;NA
TSPOP328	3	3	2	2	2,2	?	WBGene00004117;WBGene00020441;WBGene00004478	F02E9.4b;T12A2.7;F40F8.10	CEOP1980;CEOP3360;NA
TSPOP329	2	2	1	1	2	1,NA	WBGene00003148;WBGene00022733	H21P03.1;ZK418.3	CEOP4444;NA
TSPOP33	2	2	1	1	1	1,NA	WBGene00016592;WBGene00003084	C42C1.15;R160.7	CEOP4508;NA
TSPOP330	2	2	1	1	2	1,NA	WBGene00021854;WBGene00012398	Y54F10AR.1;Y6E2A.4	CEOP3861;NA
TSPOP331	2	1	0	0		?	WBGene00011910;WBGene00011910	T22B3.2a;T22B3.2b	NA;NA
TSPOP332	2	2	2	2	3,2	?	WBGene00003224;WBGene00011867	C09G4.5;T20G5.1	CEOP4294;CEOP3858
TSPOP333	2	2	1	1	3	1,NA	WBGene00022127;WBGene00006449	Y71F9B.3;ZK757.3b	CEOP1056;NA
TSPOP334	2	2	1	1	2	1,NA	WBGene00004680;WBGene00018213	C29H12.1;F39H12.2	CEOP2236;NA
TSPOP335	2	2	2	2	2,5	?	WBGene00021714;WBGene00001740	Y49F6B.1;ZC395.6	CEOP2108;CEOP3272
TSPOP336	2	2	1	1	2	1,NA	WBGene00008165;WBGene00006633	C47G2.4;T23D8.2	CEOP2694;NA
TSPOP337	2	2	1	1	2	1,NA	WBGene00015466;WBGene00008225	C05C8.9a;C50B8.3	CEOP5152;NA
TSPOP338	2	2	2	1	2	reversed	WBGene00019077;WBGene00019076	F59A3.4;F59A3.3	CEOP1256;CEOP1256
TSPOP339	2	2	0	0		?	WBGene00009920;WBGene00009099	F52B5.1a;F25B3.2	NA;NA
TSPOP34	2	2	1	1	2	1,NA	WBGene00022044;WBGene00006578	Y66H1A.2a;F25H2.1	CEOP4028;NA
TSPOP340	2	2	1	1	3	1,NA	WBGene00015232;WBGene00004368	B0511.6;C32E8.7	CEOP1628;NA
TSPOP341	3	3	1	1	2	1,NA,NA	WBGene00003794;WBGene00010941;WBGene00000417	Y41D4B.19b;M176.2;C48D1.2b	CEOP4615;NA;NA
TSPOP342	2	2	2	1	3	reversed	WBGene00013670;WBGene00000158	Y105E8A.10c;Y105E8A.9	CEOP1904;CEOP1904
TSPOP343	2	2	1	1	2	1,NA	WBGene00009452;WBGene00003953	F36A2.2;F39H11.5	CEOP1504;NA
TSPOP344	2	1	0	0		?	WBGene00007705	C25A1.1	NA
TSPOP345	2	2	0	0		?	WBGene00022154;WBGene00016331	Y71G12B.16;C32F10.1a	NA;NA
TSPOP346	2	2	1	1	3	1,NA	WBGene00011065;WBGene00010416	R06C7.6;H25P06.1	CEOP1380;NA
TSPOP347	2	1	1	1	4	?	WBGene00018149	F37C12.1	CEOP3416
TSPOP348	2	1	0	0		?	WBGene00000269;WBGene00000269	Y73E7A.7a;Y73E7A.7a	NA;NA
TSPOP349	2	2	1	1	2	1,NA	WBGene00009563;WBGene00010730	F39H2.3;K10C3.2	CEOP1496;NA
TSPOP35	2	2	2	2	2,2	?	WBGene00018161;WBGene00001372	F38A5.2b;R09B3.1a	CEOP4184;CEOP1656
TSPOP350	2	2	1	1	4	1,NA	WBGene00010437;WBGene00022199	JC8.5a;Y71H10A.1a	CEOP4536;NA
TSPOP351	2	2	0	0		?	WBGene00001037;WBGene00019673	T05C3.5;K12C11.1a	NA;NA
TSPOP352	2	2	1	1	2	1,NA	WBGene00004895;WBGene00021536	CC4.3;Y42H9AR.1	CEOP1682;NA
TSPOP353	2	2	1	1	2	1,NA	WBGene00011272;WBGene00012735	R53.2;Y40B1A.4	CEOP2746;NA
TSPOP354	2	1	0	0		?	WBGene00009307	F32A11.1	NA
TSPOP355	2	2	0	0		?	WBGene00004809;WBGene00004807	F44G3.6;F46A9.5	NA;NA
TSPOP356	2	2	2	2	2,3	?	WBGene00013041;WBGene00010731	Y49E10.22;K10C3.4a	CEOP3893;CEOP1566
TSPOP357	2	2	0	0		?	WBGene00000792;WBGene00006062	F11C7.4;F30A10.8	NA;NA
TSPOP358	2	2	0	0		?	WBGene00008053;WBGene00021095	C41C4.8;W08F4.6	NA;NA
TSPOP359	2	2	0	0		?	WBGene00006807;WBGene00012353	C17D12.2b;W09C5.7a	NA;NA
TSPOP36	2	2	2	1	2	reversed	WBGene00022835;WBGene00003061	ZK973.9;ZK973.10	CEOP1176;CEOP1176
TSPOP360	2	2	0	0		?	WBGene00000670;WBGene00000603	Y41C4A.16;C46A5.3b	NA;NA
TSPOP361	2	2	1	1	3	1,NA	WBGene00012964;WBGene00000776	Y48A6B.3;T03E6.7a	CEOP3712;NA
TSPOP362	2	2	2	1	3	identical	WBGene00000812;WBGene00021683	Y48G1C.2a;Y48G1C.10a	CEOP1940;CEOP1940
TSPOP363	2	2	2	2	7,1	?	WBGene00000796;WBGene00008427	C14A4.4a;D2085.2	CEOP2496;CEOP2376
TSPOP364	2	2	1	1	4	1,NA	WBGene00008990;WBGene00014244	F20G4.1;ZK1307.1a	CEOP1432;NA
TSPOP365	2	2	0	0		?	WBGene00009233;WBGene00009626	F28H6.4;F42A8.1	NA;NA
TSPOP366	2	1	0	0		?	WBGene00001771	T28A11.11	NA
TSPOP367	3	2	2	2	5,3	?	WBGene00016142;WBGene00009187	C26E6.6;F27D4.1	CEOP3244;CEOP1989
TSPOP368	2	2	1	1	2	1,NA	WBGene00017088;WBGene00013852	E01A2.6;ZC101.3	CEOP1892;NA
TSPOP369	2	1	0	0		?	WBGene00016422	C34G6.6c	NA
TSPOP37	2	2	2	2	2,2	?	WBGene00013231;WBGene00013920	Y56A3A.11;ZC506.3	CEOP3736;CEOPX107
TSPOP370	2	1	0	0		?	WBGene00003928	ZK945.2	NA
TSPOP371	2	2	2	2	4,3	?	WBGene00001486;WBGene00009002	F59G1.7;F21C3.3	CEOP2232;CEOP1384
TSPOP372	2	1	0	0		?	WBGene00022391	Y95B8A.12e	NA
TSPOP373	2	1	1	1	2	?	WBGene00000970	C17G10.8	CEOP2196
TSPOP375	2	2	1	1	2	1,NA	WBGene00022453;WBGene00013902	Y110A2AR.3a;ZC455.1a	CEOP2076;NA
TSPOP376	2	2	0	0		?	WBGene00009217;WBGene00007302	F28D1.8;C04F12.8	NA;NA
TSPOP377	2	2	1	1	2	1,NA	WBGene00006833;WBGene00019491	F53F10.4a;K07E3.2	CEOP1116;NA
TSPOP378	2	1	1	1	5	?	WBGene00008458	E02H1.6	CEOP2436
TSPOP379	2	2	1	1	3	1,NA	WBGene00004781;WBGene00013557	T26A5.7a;Y75B8A.24	CEOP3384;NA
TSPOP38	2	2	2	2	2,3	?	WBGene00001566;WBGene00021904	C28C12.9;Y55B1AL.2	CEOP4292;CEOP3828
TSPOP380	2	1	0	0		?	WBGene00020068	R13F6.10	NA
TSPOP381	2	1	0	0		?	WBGene00009552	F39B1.1	NA
TSPOP382	2	2	2	2	4,2	?	WBGene00006946;WBGene00012714	C34E10.4b;Y39E4B.1	CEOP3268;CEOP3819
TSPOP383	2	2	0	0		?	WBGene00016674;WBGene00005897	C45G9.2;F07G11.8	NA;NA
TSPOP384	2	2	0	0		?	WBGene00000959;WBGene00000817	F46H6.2a;B0547.1	NA;NA
TSPOP385	2	1	0	0		?	WBGene00019627	K10D2.1a	NA
TSPOP386	2	2	2	2	4,2	?	WBGene00000202;WBGene00017286	Y6D11A.1;F09E5.8	CEOP3044;CEOP2164
TSPOP387	2	2	1	1	2	1,NA	WBGene00000184;WBGene00004298	Y116A8C.12;W06D4.6	CEOP4669;NA
TSPOP388	2	2	1	1	2	1,NA	WBGene00006708;WBGene00021883	Y54G2A.31;Y54G2A.18	CEOP4072;NA
TSPOP389	2	1	0	0		?	WBGene00000162	W09G10.4a	NA
TSPOP39	2	2	1	1	2	1,NA	WBGene00011776;WBGene00018777	T14G10.7;F53H1.3a	CEOP4356;NA
TSPOP390	2	2	0	0		?	WBGene00001946;WBGene00018193	Y49E10.6b;F39C12.1	NA;NA
TSPOP391	2	2	2	1	2	reversed	WBGene00012756;WBGene00001235	Y41C4A.9;Y41C4A.10	CEOP3728;CEOP3728
TSPOP392	2	2	0	0		?	WBGene00013109;WBGene00013111	Y51H4A.15;Y51H4A.17a	NA;NA
TSPOP393	2	2	1	1	5	1,NA	WBGene00021758;WBGene00003006	Y50D7A.10;Y71F9B.5c	CEOP3851;NA
TSPOP394	2	1	0	0		?	WBGene00010023	F54B8.9	NA
TSPOP395	2	2	2	2	3,3	?	WBGene00006997;WBGene00021208	ZK546.1d;Y18H1A.2a	CEOP2690;CEOP1014
TSPOP396	2	2	0	0		?	WBGene00002228;WBGene00012739	C06G3.2;Y40B1B.7	NA;NA
TSPOP398	2	2	2	2	2,5	?	WBGene00017286;WBGene00007201	F09E5.8;B0564.1a	CEOP2164;CEOP4532
TSPOP4	3	3	2	2	3,2	?	WBGene00008364;WBGene00007752;WBGene00012927	D1046.3;C26H9A.2d;Y47D3A.14	CEOP4316;CEOP4654;NA
TSPOP40	2	2	2	2	2,5	?	WBGene00014938;WBGene00016375	Y62E10A.11;C33H5.8	CEOP4548;CEOP4252
TSPOP401	1	1	0	0		?	WBGene00045500	T05E12.9	NA
TSPOP402	2	2	1	1	4	1,NA	WBGene00006946;WBGene00017922	C34E10.4b;F29B9.7	CEOP3268;NA
TSPOP403	1	1	1	1	5	?	WBGene00001823	ZC395.7	CEOP3272
TSPOP404	2	2	0	0		?	WBGene00011280;WBGene00015286	R74.6;C01B12.3	NA;NA
TSPOP405	2	2	1	1	2	1,NA	WBGene00001233;WBGene00011802	T16G1.11;T16G1.9	CEOP5376;NA
TSPOP406	2	1	1	1	4	?	WBGene00017889	F28B3.10	CEOP1208
TSPOP407	2	2	2	2	4,2	?	WBGene00006946;WBGene00012714	C34E10.4b;Y39E4B.1	CEOP3268;CEOP3819
TSPOP408	2	2	2	1	3	reversed	WBGene00008008;WBGene00008006	C38D4.9;C38D4.5b	CEOP3220;CEOP3220
TSPOP409	1	1	0	0		?	WBGene00003412	F20B6.3	NA
TSPOP41	2	2	1	1	3	1,NA	WBGene00015793;WBGene00001371	C15C7.7;F26H11.5	CEOPX040;NA
TSPOP410	2	2	2	2	3,4	?	WBGene00022759;WBGene00000838	ZK546.2b;Y108G3AL.1b	CEOP2690;CEOP5588
TSPOP411	1	1	1	1	3	?	WBGene00010130	F55H2.2	CEOP3880
TSPOP412	2	2	2	2	2,2	?	WBGene00000940;WBGene00013997	Y113G7A.9a;ZK550.3	CEOP5500;CEOP4600
TSPOP413	2	2	2	2	3,6	?	WBGene00015353;WBGene00020110	C02F5.13;R151.7b	CEOP3496;CEOP3424
TSPOP42	5	5	4	4	4,2,3,2	?	WBGene00011860;WBGene00012730;WBGene00004424;WBGene00011941;WBGene00010033	T20D3.8;Y39G8C.1;JC8.3a;T23B5.4a;F54B11.10	CEOP4328;CEOP2724;CEOP4535;CEOP4654;NA
TSPOP43	2	2	1	1	4	1,NA	WBGene00007616;WBGene00007882	C15H11.8;C33A12.3a	CEOP5416;NA
TSPOP44	2	2	2	2	3,3	?	WBGene00021515;WBGene00019822	Y41D4B.12a;R02D3.4b	CEOP4047;CEOP4008
TSPOP45	2	2	0	0		?	WBGene00045242;WBGene00016913	C05B5.11;C54D1.5	NA;NA
TSPOP46	2	1	0	0		?	WBGene00003849	T01C4.2b	NA
TSPOP47	2	2	2	2	6,3	?	WBGene00015238;WBGene00013376	B0511.13b;Y62E10A.6	CEOP1632;CEOP4540
TSPOP48	2	2	2	2	2,3	?	WBGene00016740;WBGene00017999	C48B6.2;F33D4.7	CEOP1356;CEOP4240
TSPOP49	2	1	1	1	5	?	WBGene00044325	C33H5.19	CEOP4252
TSPOP5	2	2	1	1	4	1,NA	WBGene00013462;WBGene00018740	Y67H2A.4d;F53B3.1	CEOP4538;NA
TSPOP50	2	2	2	2	2,2	?	WBGene00013176;WBGene00020215	Y53F4B.39a;T04G9.4	CEOP2660;CEOPX147
TSPOP51	5	5	3	3	2,2,2	?	WBGene00000764;WBGene00021715;WBGene00018723;WBGene00004482;WBGene00001808	T03F1.2;Y49F6B.2;F53A3.7;C16A3.9;T10G3.6a	CEOP1124;CEOP2108;CEOP3845;NA;NA
TSPOP52	2	2	0	0		?	WBGene00012259;WBGene00023409	W04G3.6d;C27A12.10	NA;NA
TSPOP53	2	2	1	1	2	1,NA	WBGene00007588;WBGene00020365	C14C10.5b;T08G2.2	CEOP5574;NA
TSPOP54	2	2	1	1	4	1,NA	WBGene00001093;WBGene00022004	T12E12.4b;Y59H11AL.1b	CEOP4168;NA
TSPOP55	2	2	2	1	3	reversed	WBGene00011123;WBGene00011122	R07H5.3c;R07H5.2a	CEOP4424;CEOP4424
TSPOP56	2	2	0	0		?	WBGene00006696;WBGene00003062	Y39B6A.19a;K09H9.6	NA;NA
TSPOP58	2	2	0	0		?	WBGene00003008;WBGene00022172	Y54G2A.1;Y71H2AM.7	NA;NA
TSPOP59	2	2	1	1	5	1,NA	WBGene00013678;WBGene00020471	Y105E8A.20b;T13B5.3	CEOP1736;NA
TSPOP6	2	2	1	1	2	1,NA	WBGene00001999;WBGene00002266	F42A6.7a;ZK892.1b	CEOP4080;NA
TSPOP60	2	1	0	0		?	WBGene00020437	T12A2.2	NA
TSPOP61	2	2	1	1	4	1,NA	WBGene00016392;WBGene00043705	C34B2.7;Y55F3AM.7a	CEOP1636;NA
TSPOP62	2	2	2	1	2	identical	WBGene00004759;WBGene00008452	F45D3.5;E02A10.1	CEOP5356;CEOP5356
TSPOP63	2	1	0	0		?	WBGene00018547	F47C12.2	NA
TSPOP64	2	2	1	1	2	1,NA	WBGene00001366;WBGene00004276	C33D9.1c;K09A9.2	CEOP4610;NA
TSPOP65	2	2	1	1	2	1,NA	WBGene00011687;WBGene00018833	T10C6.5;F54F2.5a	CEOP5452;NA
TSPOP66	3	3	1	1	6	1,NA,NA	WBGene00020113;WBGene00006512;WBGene00006368	R151.10;F18E2.2;C54H2.1a	CEOP3424;NA;NA
TSPOP67	2	2	1	1	2	1,NA	WBGene00002986;WBGene00007007	C07H6.1;C44C8.6	CEOP3849;NA
TSPOP68	2	2	0	0		?	WBGene00014086;WBGene00000520	ZK809.3;R07E5.8a	NA;NA
TSPOP69	3	3	0	0		?	WBGene00003423;WBGene00001177;WBGene00009882	R10E9.1;B0348.4y;F49C12.13	NA;NA;NA
TSPOP7	2	2	2	1	3	reversed	WBGene00008008;WBGene00008006	C38D4.9;C38D4.5a	CEOP3220;CEOP3220
TSPOP70	4	4	1	1	2	1,NA,NA,NA	WBGene00001590;WBGene00008586;WBGene00019898;WBGene00006853	C45G3.3;F08G12.2;R05G6.4;C47G2.2	CEOP1986;NA;NA;NA
TSPOP71	2	1	1	1	2	?	WBGene00004031	T13F2.3b	CEOP4624
TSPOP72	2	1	1	1	2	?	WBGene00013144	Y53C12B.2	CEOP2452
TSPOP73	2	2	1	1	2	1,NA	WBGene00001590;WBGene00007022	C45G3.3;ZK970.3	CEOP1986;NA
TSPOP74	2	2	1	1	2	1,NA	WBGene00044077;WBGene00045237	T18H9.7a;F39H2.5	CEOP5220;NA
TSPOP75	2	2	1	1	4	1,NA	WBGene00006349;WBGene00021416	F39B2.4a;Y38F2AL.2	CEOP1760;NA
TSPOP76	2	2	1	1	2	1,NA	WBGene00009127;WBGene00004077	F25H5.5a;W10C8.2	CEOP1540;NA
TSPOP77	2	2	0	0		?	WBGene00003813;WBGene00011286	C08B11.4;R90.4	NA;NA
TSPOP78	2	2	0	0		?	WBGene00006452;WBGene00020114	R148.6;R153.1h	NA;NA
TSPOP79	2	2	2	2	4,3	?	WBGene00011634;WBGene00013406	T09A5.5;Y63D3A.7	CEOP2312;CEOP1731
TSPOP8	2	2	0	0		?	WBGene00012978;WBGene00012917	Y48B6A.1;Y46G5A.29	NA;NA
TSPOP80	3	3	1	1	3	1,NA,NA	WBGene00010408;WBGene00002162;WBGene00004979	H19N07.4a;F42G8.12;F42G8.11	CEOP5272;NA;NA
TSPOP81	2	1	0	0		?	WBGene00010812	M01F1.6	NA
TSPOP82	2	2	1	1	3	1,NA	WBGene00013587;WBGene00004188	Y80D3A.9;W07E6.4	CEOP5476;NA
TSPOP83	2	2	2	2	2,2	?	WBGene00000962;WBGene00000181	T21E12.4b;F01G4.2a	CEOP1994;CEOP4412
TSPOP84	2	2	0	0		?	WBGene00012814;WBGene00007938	Y43F8B.3b;C34F6.1	NA;NA
TSPOP85	2	1	0	0		?	WBGene00018468	F45E4.3e	NA
TSPOP86	2	2	1	1	3	1,NA	WBGene00010044;WBGene00021807	F54C9.9;Y53G8AM.7	CEOP2368;NA
TSPOP87	2	1	1	1	2	?	WBGene00002497	F52H3.1	CEOP2696
TSPOP88	2	2	1	1	8	1,NA	WBGene00138717;WBGene00003009	F52C12.6a;K10B2.1d	CEOP4052;NA
TSPOP89	2	2	0	0		?	WBGene00012665;WBGene00013481	Y39B6A.2a;Y69H2.3e	NA;NA
TSPOP9	2	2	1	1	2	1,NA	WBGene00003389;WBGene00020562	K03H1.2;T19C3.4	CEOP3642;NA
TSPOP90	2	2	1	1	2	1,NA	WBGene00004136;WBGene00012666	K11D12.2;Y39B6A.3a	CEOP5564;NA
TSPOP91	2	2	1	1	2	1,NA	WBGene00022379;WBGene00014243	Y94H6A.7;ZK1251.9a	CEOP4068;NA
TSPOP92	2	2	1	1	2	1,NA	WBGene00012037;WBGene00004403	T26E3.4;Y116A8C.16f	CEOP1672;NA
TSPOP93	2	1	0	0		?	WBGene00018932	F56B3.8a	NA
TSPOP94	2	1	1	1	7	?	WBGene00003693	F44C8.4	CEOP5028
TSPOP95	2	2	0	0		?	WBGene00011821;WBGene00020556	T18D3.3a;T19B4.1	NA;NA
TSPOP96	2	2	1	1	3	1,NA	WBGene00008684;WBGene00003733	F11A10.3a;F57C7.2b	CEOP4490;NA
TSPOP97	2	1	0	0		?	WBGene00007534	C12D8.1a	NA
TSPOP98	2	2	2	2	6,5	?	WBGene00012694;WBGene00021752	Y39B6A.36;Y50D7A.2	CEOP5480;CEOP3851
TSPOP99	3	3	1	1	2	1,NA,NA	WBGene00010042;WBGene00006494;WBGene00004749	F54C9.6;H13N06.5;F57C7.3a	CEOP2364;NA;NA

## Sheet: BT10c
T. spiralis operon	Genes	Homologous C. elegans genes	Homologous C. elegans operonic genes	C. elegans operons	C. elegans operon sizes	Synteny	C. elegans gene IDs	C. elegans gene names	C. elegans operon IDs
TSPOP1	2	1	1	1	8	?	WBGene00021655	Y48A5A.1	CEOP4052
TSPOP10	2	2	1	1	2	1,NA	WBGene00007668;WBGene00012717	C18B12.6;Y39E4B.6b	CEOPX132;NA
TSPOP100	3	3	1	1	3	1,NA,NA	WBGene00018934;WBGene00020050;WBGene00018932	F56B3.11a;R13A5.7;F56B3.8a	CEOP4036;NA;NA
TSPOP101	2	2	0	0		?	WBGene00020556;WBGene00011821	T19B4.1;T18D3.3a	NA;NA
TSPOP102	2	2	1	1	3	1,NA	WBGene00008684;WBGene00007697	F11A10.3a;C24F3.2	CEOP4490;NA
TSPOP103	2	2	0	0		?	WBGene00003736;WBGene00022475	ZK822.3b;Y119C1B.10b	NA;NA
TSPOP104	2	2	2	2	6,5	?	WBGene00012694;WBGene00021752	Y39B6A.36;Y50D7A.2	CEOP5480;CEOP3851
TSPOP105	2	2	1	1	2	1,NA	WBGene00010042;WBGene00015508	F54C9.6;C06A6.3	CEOP2364;NA
TSPOP106	2	2	2	1	2	identical	WBGene00021956;WBGene00021960	Y57E12AL.1a;Y57E12AM.1	CEOP5534;CEOP5534
TSPOP107	2	2	2	1	4	identical	WBGene00000818;WBGene00013464	Y67H2A.6b;Y67H2A.7a	CEOP4538;CEOP4538
TSPOP108	2	1	1	1	3	?	WBGene00044025	T01G1.4	CEOP4639
TSPOP109	2	2	0	0		?	WBGene00012916;WBGene00044631	Y46G5A.28;F55A11.5	NA;NA
TSPOP11	2	2	2	2	2,4	?	WBGene00006701;WBGene00008664	C35B1.1;F10G8.6	CEOP4112;CEOP1584
TSPOP110	2	2	2	1	2	identical	WBGene00021421;WBGene00021423	Y38F2AR.3a;Y38F2AR.5b	CEOP4060;CEOP4060
TSPOP111	2	2	0	0		?	WBGene00010356;WBGene00001555	H03A11.1;T04D3.4a	NA;NA
TSPOP112	2	2	2	2	2,2	?	WBGene00021934;WBGene00006497	Y55F3AR.3a;F10G7.1	CEOP4046;CEOP2132
TSPOP113	2	2	2	2	4,2	?	WBGene00001860;WBGene00001635	F28B3.7a;Y45F10D.3b	CEOP1208;CEOP4560
TSPOP114	2	2	1	1	4	1,NA	WBGene00012643;WBGene00017605	Y39A1A.3;F19F10.9	CEOP3684;NA
TSPOP115	2	2	2	2	2,3	?	WBGene00009084;WBGene00006607	F23B12.7;F57B10.7	CEOP5420;CEOP1336
TSPOP116	2	2	2	2	6,6	?	WBGene00019163;WBGene00006489	H06H21.6;ZK856.9	CEOP4152;CEOP5248
TSPOP117	2	2	2	1	3	identical	WBGene00004432;WBGene00017121	E04A4.8;E04A4.7	CEOP4148;CEOP4148
TSPOP118	2	1	1	1	2	?	WBGene00010304	F59A2.4a	CEOP3108
TSPOP119	2	2	1	1	2	1,NA	WBGene00002891;WBGene00008259	C56G2.6a;C52E4.7	CEOP3870;NA
TSPOP12	3	3	3	2	3,2	?	WBGene00012966;WBGene00022794;WBGene00022793	Y48A6B.5;ZK686.4;ZK686.3	CEOP3712;CEOP3452;CEOP3452
TSPOP120	2	2	1	1	2	1,NA	WBGene00001983;WBGene00009131	E04A4.4b;F25H8.1b	CEOP4144;NA
TSPOP121	2	1	0	0		?	WBGene00044637	Y47D7A.16a	NA
TSPOP122	2	2	2	2	3,3	?	WBGene00007387;WBGene00007020	C06H2.3a;Y104H12D.1a	CEOP5276;CEOP4049
TSPOP123	2	2	0	0		?	WBGene00010134;WBGene00014095	F55H12.3;ZK829.4	NA;NA
TSPOP124	3	2	1	1	3	1,NA	WBGene00006957;WBGene00016844	C07G1.4a;C50F7.4	CEOP4274;NA
TSPOP125	2	2	1	1	3	1,NA	WBGene00000996;WBGene00021870	F49E8.5;Y54G2A.4	CEOP4228;NA
TSPOP126	2	2	0	0		?	WBGene00008281;WBGene00013455	C53D6.4b;Y67A10A.6c	NA;NA
TSPOP127	2	2	2	2	2,2	?	WBGene00009006;WBGene00010557	F21D5.1;K04D7.2b	CEOP4300;CEOP4360
TSPOP128	2	2	0	0		?	WBGene00014666;WBGene00003963	C05D12.3a;C07A12.4a	NA;NA
TSPOP129	2	2	1	1	2	1,NA	WBGene00017797;WBGene00000390	F25G6.2;R07G3.1	CEOP5204;NA
TSPOP13	2	2	2	1	6	reversed	WBGene00020422;WBGene00006736	T10F2.2;T10F2.3	CEOP3260;CEOP3260
TSPOP130	2	2	0	0		?	WBGene00004738;WBGene00007652	F18E2.3;C17G1.5	NA;NA
TSPOP131	2	2	2	2	4,2	?	WBGene00022456;WBGene00017928	Y110A7A.6b;F29C4.6	CEOP1220;CEOP4004
TSPOP132	2	2	1	1	2	1,NA	WBGene00013301;WBGene00022232	Y57G11C.3b;Y73B6BL.3	CEOP4667;NA
TSPOP133	2	1	0	0		?	WBGene00001169;WBGene00001169	R03G5.1d;R03G5.1a	NA;NA
TSPOP134	3	3	2	2	3,5	?	WBGene00013378;WBGene00010809;WBGene00019899	Y62E10A.10;M01F1.3;R05G6.5	CEOP4544;CEOP3124;NA
TSPOP135	2	2	0	0		?	WBGene00020517;WBGene00010722	T15B7.2;K09E4.4	NA;NA
TSPOP136	2	2	2	2	4,3	?	WBGene00000761;WBGene00007111	C24A11.9;B0035.12	CEOP1248;CEOP4440
TSPOP137	2	2	0	0		?	WBGene00003657;WBGene00007880	C08F8.8;C33A12.1	NA;NA
TSPOP138	2	2	2	2	2,2	?	WBGene00003407;WBGene00009829	F57C12.5c;F47G9.1	CEOPX154;CEOP5522
TSPOP139	2	1	0	0		?	WBGene00022861	ZK1193.5a	NA
TSPOP14	2	2	2	2	3,2	?	WBGene00021133;WBGene00011144	W10D9.5a;R08D7.4b	CEOP2686;CEOP3560
TSPOP140	2	2	0	0		?	WBGene00002140;WBGene00021012	C18H7.2b;W03G1.6d	NA;NA
TSPOP141	2	1	1	1	4	?	WBGene00006724	C08B11.7	CEOP2328
TSPOP142	2	2	2	2	3,3	?	WBGene00007645;WBGene00022121	C17E4.6;Y71F9AM.4a	CEOP1544;CEOP1076
TSPOP143	3	2	1	1	3	1,NA	WBGene00017646;WBGene00006772	F20H11.1;C50C3.9c	CEOP3392;NA
TSPOP144	2	1	1	1	3	?	WBGene00003594	Y56A3A.13	CEOP3744
TSPOP145	2	2	2	2	3,2	?	WBGene00022381;WBGene00022380	Y94H6A.9a;Y94H6A.8	CEOP4665;CEOP4068
TSPOP146	2	2	1	1	2	1,NA	WBGene00011451;WBGene00017534	T04H1.5;F17A9.2	CEOP5336;NA
TSPOP147	2	2	0	0		?	WBGene00017765;WBGene00017037	F25B4.1;D1069.3b	NA;NA
TSPOP148	2	2	1	1	3	1,NA	WBGene00044329;WBGene00018281	F11A10.8;F41D9.1	CEOP4490;NA
TSPOP149	2	2	1	1	2	1,NA	WBGene00004494;WBGene00022416	K02B2.5;Y102A11A.6	CEOP4611;NA
TSPOP15	3	3	3	3	3,2,3	?	WBGene00021133;WBGene00011144;WBGene00022400	W10D9.5a;R08D7.4b;Y97E10AR.5	CEOP2686;CEOP3560;CEOP5172
TSPOP150	3	2	1	1	6	1,NA	WBGene00020109;WBGene00011939	R151.6;T23B5.1a	CEOP3424;NA
TSPOP151	2	2	2	1	5	reversed	WBGene00023422;WBGene00009648	F43C1.6;F43C1.3	CEOP3164;CEOP3164
TSPOP152	2	2	2	2	2,3	?	WBGene00008769;WBGene00003162	F13G3.11;F20H11.3	CEOP1392;CEOP3392
TSPOP153	2	2	2	1	3	reversed	WBGene00014027;WBGene00006768	ZK637.9b;ZK637.8f	CEOP3556;CEOP3556
TSPOP154	2	2	1	1	3	1,NA	WBGene00006540;WBGene00017811	F58A4.8;F26A1.13	CEOP3608;NA
TSPOP155	2	1	0	0		?	WBGene00001281	F10B5.6	NA
TSPOP156	2	2	0	0		?	WBGene00008345;WBGene00219217	C56A3.6b;C08F8.15	NA;NA
TSPOP157	2	1	1	1	2	?	WBGene00002002	K08E7.2	CEOP4520
TSPOP158	2	2	1	1	3	1,NA	WBGene00008684;WBGene00004228	F11A10.3a;R09H10.4	CEOP4490;NA
TSPOP159	3	2	1	1	7	1,NA	WBGene00009735;WBGene00022801	F45G2.9;ZK688.6a	CEOP3792;NA
TSPOP16	2	2	2	2	2,1	?	WBGene00013317;WBGene00302986	Y57G11C.22a;Y37E11AM.4	CEOP4661;CEOP5604
TSPOP160	2	2	0	0		?	WBGene00002217;WBGene00006620	F56E3.3c;C07G1.1	NA;NA
TSPOP161	2	1	1	1	2	?	WBGene00000247	T19E7.3a	CEOP4172
TSPOP162	2	2	1	1	2	1,NA	WBGene00017734;WBGene00020216	F23C8.5a;T04G9.5	CEOP1044;NA
TSPOP163	2	1	1	1	2	?	WBGene00004759	F45D3.5	CEOP5356
TSPOP164	2	2	1	1	2	1,NA	WBGene00004430;WBGene00019492	Y45F10D.12;K07E3.4b	CEOP4560;NA
TSPOP165	2	2	1	1	3	1,NA	WBGene00015487;WBGene00003047	C05D11.10;T03F6.5	CEOP3372;NA
TSPOP166	2	1	0	0		?	WBGene00003377	C39E6.4	NA
TSPOP167	2	2	0	0		?	WBGene00012600;WBGene00001793	Y38E10A.22a;Y46G5A.31	NA;NA
TSPOP168	2	2	0	0		?	WBGene00018867;WBGene00022785	F55A12.10;ZK652.6a	NA;NA
TSPOP169	2	2	0	0		?	WBGene00020276;WBGene00003802	T05H4.15c;Y56A3A.17	NA;NA
TSPOP170	2	2	1	1	4	1,NA	WBGene00004095;WBGene00003975	F52C9.8f;T28D6.9	CEOP3284;NA
TSPOP171	2	2	1	1	2	1,NA	WBGene00009341;WBGene00012258	F32H2.4;W04G3.5a	CEOP1520;NA
TSPOP172	2	2	0	0		?	WBGene00022798;WBGene00008749	ZK688.3;F13E6.5	NA;NA
TSPOP173	2	2	0	0		?	WBGene00001579;WBGene00001018	F56A11.1;C28H8.12	NA;NA
TSPOP174	2	1	1	1	2	?	WBGene00021021	W04B5.4	CEOP3076
TSPOP175	2	2	0	0		?	WBGene00019498;WBGene00010229	K07E8.7a;F58A4.6	NA;NA
TSPOP176	2	2	0	0		?	WBGene00016400;WBGene00007484	C34D4.4;C09G1.2	NA;NA
TSPOP177	2	2	2	2	2,2	?	WBGene00001258;WBGene00002185	Y80D3A.2e;T27E9.4a	CEOP5472;CEOP3800
TSPOP178	2	2	1	1	2	1,NA	WBGene00022078;WBGene00044720	Y69A2AR.7a;Y53F4B.42	CEOP4658;NA
TSPOP179	2	2	1	1	6	1,NA	WBGene00020636;WBGene00022664	T20H4.5;ZK121.2	CEOP3424;NA
TSPOP18	2	1	0	0		?	WBGene00017166	F01F1.12b	NA
TSPOP180	2	2	1	1	3	1,NA	WBGene00017981;WBGene00020687	F32D1.1a;T22D1.10	CEOP5052;NA
TSPOP181	2	2	0	0		?	WBGene00000516;WBGene00003020	T05A6.1;C32F10.2	NA;NA
TSPOP182	2	2	1	1	3	1,NA	WBGene00010230;WBGene00001596	F58A4.9;ZC308.1b	CEOP3608;NA
TSPOP183	2	1	1	1	3	?	WBGene00010479	K01G5.8a	CEOP3700
TSPOP184	3	3	1	1	3	1,NA,NA	WBGene00016990;WBGene00010283;WBGene00006786	CD4.4;F58G11.6;Y60A3A.1	CEOP5076;NA;NA
TSPOP185	2	2	0	0		?	WBGene00006786;WBGene00010283	Y60A3A.1;F58G11.6	NA;NA
TSPOP186	2	2	1	1	2	1,NA	WBGene00022599;WBGene00020088	ZC395.10;R119.2	CEOP3276;NA
TSPOP187	2	1	1	1	2	?	WBGene00000564	R01H10.8	CEOP3890
TSPOP188	2	2	1	1	3	1,NA	WBGene00012645;WBGene00019199	Y39A1A.6;H14E04.2b	CEOP3688;NA
TSPOP189	2	2	2	2	3,2	?	WBGene00002850;WBGene00009284	C16A3.3;F31C3.2b	CEOP3368;CEOP1965
TSPOP19	3	2	1	1	3	1,NA	WBGene00011773;WBGene00011775	T14G10.3;T14G10.5d	CEOP4619;NA
TSPOP190	2	2	1	1	2	1,NA	WBGene00017547;WBGene00000101	F18A1.6b;D1022.7c	CEOP2668;NA
TSPOP191	2	2	1	1	4	1,NA	WBGene00004185;WBGene00000101	R166.4;D1022.7b	CEOP2492;NA
TSPOP192	2	2	0	0		?	WBGene00001329;WBGene00016311	T04C10.2a;C32D5.3	NA;NA
TSPOP193	2	2	1	1	3	1,NA	WBGene00001262;WBGene00022055	K10D2.6;Y67D2.5	CEOP3848;NA
TSPOP194	2	2	2	2	3,2	?	WBGene00017982;WBGene00006840	F32D1.2;R05D3.7	CEOP5052;CEOP3512
TSPOP195	2	1	0	0		?	WBGene00002008	F43E2.8a	NA
TSPOP196	2	1	1	1	2	?	WBGene00015133	B0303.15	CEOP3538
TSPOP197	2	2	0	0		?	WBGene00020397;WBGene00020160	T10B11.1;T02C5.3b	NA;NA
TSPOP198	2	2	0	0		?	WBGene00021074;WBGene00002179	W07E6.2a;T22C1.7	NA;NA
TSPOP199	2	2	1	1	2	1,NA	WBGene00013209;WBGene00019227	Y54G9A.6;H22K11.4a	CEOP2618;NA
TSPOP2	2	2	1	1	4	1,NA	WBGene00012641;WBGene00018793	Y39A1A.1c;F54C4.1	CEOP3684;NA
TSPOP20	2	1	1	1	3	?	WBGene00015555	C06G3.9	CEOP4208
TSPOP200	2	2	1	1	3	1,NA	WBGene00016754;WBGene00015168	C48E7.11;B0403.4	CEOP1316;NA
TSPOP201	2	2	1	1	2	1,NA	WBGene00006729;WBGene00006816	K07B1.3;F54B11.3a	CEOP5224;NA
TSPOP202	2	1	0	0		?	WBGene00021228	Y19D10A.13	NA
TSPOP203	2	1	1	1	3	?	WBGene00006768	ZK637.8e	CEOP3556
TSPOP204	2	2	1	1	4	1,NA	WBGene00012641;WBGene00016073	Y39A1A.1c;C24H12.4a	CEOP3684;NA
TSPOP205	2	2	2	1	3	reversed	WBGene00023450;WBGene00011730	T12D8.10;T12D8.2	CEOP3818;CEOP3818
TSPOP206	2	2	2	2	3,2	?	WBGene00006725;WBGene00000767	H06I04.4a;C35D10.4	CEOP3088;CEOP3226
TSPOP207	2	2	1	1	2	1,NA	WBGene00022704;WBGene00009288	ZK353.9;F31C3.6a	CEOP3522;NA
TSPOP208	2	2	1	1	3	1,NA	WBGene00012204;WBGene00017716	W02B12.9;F22F4.1	CEOP2540;NA
TSPOP209	2	2	1	1	2	1,NA	WBGene00012768;WBGene00006634	Y41E3.10b;F33C8.3	CEOP4685;NA
TSPOP21	2	2	1	1	4	1,NA	WBGene00004385;WBGene00001161	K08D10.4;Y102A5C.18	CEOP4116;NA
TSPOP210	2	1	0	0		?	WBGene00010488	K02A11.3	NA
TSPOP211	2	2	2	2	3,2	?	WBGene00010325;WBGene00021844	F59C6.4;Y54E10BR.5	CEOP1616;CEOP1924
TSPOP212	2	2	2	2	3,4	?	WBGene00022188;WBGene00010615	Y71H2AR.1;K07A1.9f	CEOP3086;CEOP1552
TSPOP213	2	2	0	0		?	WBGene00002203;WBGene00002202	F46F2.2b;C03C10.1	NA;NA
TSPOP214	2	2	2	1	2	identical	WBGene00013802;WBGene00013803	Y116A8C.25a;Y116A8C.26b	CEOP4632;CEOP4632
TSPOP215	2	2	1	1	4	1,NA	WBGene00008667;WBGene00007969	F10G8.9b;C36A4.9b	CEOP1584;NA
TSPOP216	2	1	0	0		?	WBGene00010909	M88.7	NA
TSPOP217	2	2	0	0		?	WBGene00002977;WBGene00006780	Y105E8A.7b;B0350.2e	NA;NA
TSPOP218	2	2	1	1	4	1,NA	WBGene00019245;WBGene00001017	H27M09.1;ZK593.5e	CEOP1902;NA
TSPOP219	2	2	1	1	2	1,NA	WBGene00011631;WBGene00012144	T08G11.4b;T28H10.3	CEOP1508;NA
TSPOP22	2	1	1	1	6	?	WBGene00009771	F46B6.6a	CEOP5236
TSPOP220	2	2	1	1	2	1,NA	WBGene00020391;WBGene00022855	T10B5.5b;ZK1127.9b	CEOP5560;NA
TSPOP221	2	2	2	2	3,2	?	WBGene00007021;WBGene00011274	C24H11.6;R53.5	CEOP3831;CEOP2734
TSPOP222	2	2	0	0		?	WBGene00004180;WBGene00000875	F58A4.4a;K08E3.6	NA;NA
TSPOP223	2	2	1	1	4	1,NA	WBGene00007617;WBGene00016015	C15H11.9;C23G10.8	CEOP5416;NA
TSPOP224	2	2	0	0		?	WBGene00004873;WBGene00017758	Y47D3A.26c;F23H11.2	NA;NA
TSPOP225	2	2	2	1	2	identical	WBGene00004460;WBGene00016249	C30C11.2;C30C11.1	CEOP3528;CEOP3528
TSPOP226	2	2	1	1	3	1,NA	WBGene00018131;WBGene00021738	F37A4.1;Y50D4A.4a	CEOP3400;NA
TSPOP227	2	2	1	1	2	1,NA	WBGene00016591;WBGene00016469	C42C1.13b;C36B7.6	CEOP4504;NA
TSPOP228	2	2	2	2	2,3	?	WBGene00015160;WBGene00013735	B0361.6;Y111B2A.12b	CEOP3833;CEOP3766
TSPOP229	2	1	0	0		?	WBGene00008882	F16B12.6	NA
TSPOP23	2	2	2	1	5	identical	WBGene00022852;WBGene00195239	ZK1127.5;ZK1127.13	CEOP2280;CEOP2280
TSPOP230	2	2	1	1	2	1,NA	WBGene00000536;WBGene00017010	ZC395.2;D1007.15a	CEOP3280;NA
TSPOP231	2	2	1	1	4	1,NA	WBGene00015809;WBGene00021815	C16A3.4;Y53G8AR.8	CEOP3364;NA
TSPOP232	2	2	2	2	2,2	?	WBGene00022192;WBGene00014218	Y71H2B.2;ZK1098.1a	CEOP3853;CEOP3596
TSPOP233	2	1	1	1	2	?	WBGene00013237	Y56A3A.19	CEOP3738
TSPOP234	2	2	1	1	5	1,NA	WBGene00009648;WBGene00016503	F43C1.3;C37C3.11	CEOP3164;NA
TSPOP235	3	3	2	1	2	1,2,NA	WBGene00003882;WBGene00010333;WBGene00007186	F59E10.1;F59E10.3;B0464.6	CEOP2508;CEOP2508;NA
TSPOP236	3	3	2	2	2,3	?	WBGene00021311;WBGene00019301;WBGene00003593	Y32H12A.2a;K02D10.1b;F42A10.2a	CEOP3292;CEOP3540;NA
TSPOP237	2	2	1	1	5	1,NA	WBGene00010809;WBGene00004255	M01F1.3;T20G5.5	CEOP3124;NA
TSPOP238	2	1	0	0		?	WBGene00000532	C07H4.2	NA
TSPOP239	2	2	2	2	2,2	?	WBGene00015173;WBGene00015648	B0412.3a;C09F5.2a	CEOP3036;CEOP3859
TSPOP24	3	1	1	1	3	?	WBGene00003870	C18E9.11a	CEOP2404
TSPOP240	2	2	1	1	4	1,NA	WBGene00000985;WBGene00003033	C15H11.4;F34D10.5	CEOP5416;NA
TSPOP241	4	4	3	2	5,3	?	WBGene00001660;WBGene00020189;WBGene00001661;WBGene00020443	C34E10.3;T03F1.7;C34E10.2;T12A2.15a	CEOP3272;CEOP1120;CEOP3272;NA
TSPOP242	2	2	1	1	3	1,NA	WBGene00006515;WBGene00015104	C05D11.3;B0280.9	CEOP3376;NA
TSPOP243	3	3	2	2	3,2	?	WBGene00022167;WBGene00022166;WBGene00006484	Y71H2AM.2;Y71H2AM.1;F08A8.6	CEOP3086;CEOP5632;NA
TSPOP244	2	2	1	1	2	1,NA	WBGene00020268;WBGene00002079	T05H4.5;Y48G1A.5a	CEOP5112;NA
TSPOP245	2	2	1	1	2	1,NA	WBGene00020268;WBGene00002079	T05H4.5;Y48G1A.5a	CEOP5112;NA
TSPOP246	2	2	1	1	2	1,NA	WBGene00012187;WBGene00001166	W01G7.3;ZK328.2	CEOP2624;NA
TSPOP247	2	2	1	1	2	1,NA	WBGene00007912;WBGene00017963	C34B7.2;F31F4.17	CEOP1464;NA
TSPOP248	2	2	1	1	3	1,NA	WBGene00022402;WBGene00006780	Y97E10AR.7;B0350.2h	CEOP5172;NA
TSPOP249	3	3	2	1	2	2,1,NA	WBGene00022576;WBGene00018431;WBGene00009966	ZC250.2;F44E7.9;F53B7.3	CEOP5084;CEOP5084;NA
TSPOP25	2	1	2	1	2	1,1	WBGene00012765;WBGene00012765	Y41E3.7a;Y41E3.7c	CEOP4581;CEOP4581
TSPOP250	2	2	1	1	2	1,NA	WBGene00010279;WBGene00000433	F58G11.1b;ZK265.4a	CEOP5398;NA
TSPOP251	2	2	2	2	3,2	?	WBGene00019460;WBGene00021350	K06H7.9;Y37E3.8a	CEOP3480;CEOP1032
TSPOP252	2	1	0	0		?	WBGene00013123	Y52B11A.3a	NA
TSPOP253	2	2	2	2	3,4	?	WBGene00003059;WBGene00019612	C48E7.3;K10B3.6d	CEOP1316;CEOPX036
TSPOP254	2	1	0	0		?	WBGene00003417	Y41C4A.14	NA
TSPOP255	2	2	1	1	2	1,NA	WBGene00001618;WBGene00002261	C43H6.9c;F58A3.1a	CEOPX032;NA
TSPOP256	2	2	1	1	2	1,NA	WBGene00018077;WBGene00014224	F35H12.5a;ZK1098.7	CEOPX008;NA
TSPOP257	2	2	0	0		?	WBGene00007972;WBGene00011543	C36B1.5;T06E8.1a	NA;NA
TSPOP258	2	2	1	1	2	1,NA	WBGene00021363;WBGene00012550	Y37E11AL.8;Y37D8A.10	CEOP4653;NA
TSPOP259	2	2	0	0		?	WBGene00010496;WBGene00018872	K02B12.3;F55C12.5a	NA;NA
TSPOP26	2	1	0	0		?	WBGene00011095	R07B7.11	NA
TSPOP260	2	1	0	0		?	WBGene00010776	K11E4.4b	NA
TSPOP261	2	2	2	2	4,1	?	WBGene00017293;WBGene00016427	F09E5.17;C34H4.5a	CEOP2168;CEOP4631
TSPOP262	2	2	0	0		?	WBGene00000377;WBGene00008860	T05C12.7;F15D4.3	NA;NA
TSPOP263	2	2	1	1	2	1,NA	WBGene00020366;WBGene00006309	T08G2.3;D1014.1	CEOPX144;NA
TSPOP264	2	2	0	0		?	WBGene00013702;WBGene00016800	Y106G6D.6;C50C3.2	NA;NA
TSPOP265	2	1	0	0		?	WBGene00007059	F08C6.3	NA
TSPOP266	2	2	1	1	5	1,NA	WBGene00001092;WBGene00006856	F53A2.5;C13B4.2	CEOP3784;NA
TSPOP267	2	2	1	1	2	1,NA	WBGene00020417;WBGene00008920	T10E9.7;F17C11.9a	CEOP1326;NA
TSPOP268	2	2	1	1	2	1,NA	WBGene00011247;WBGene00002248	R11D1.9;T22A3.8	CEOP5368;NA
TSPOP269	2	2	1	1	2	1,NA	WBGene00001151;WBGene00004488	F38H4.8a;T05F1.3	CEOP4660;NA
TSPOP27	2	2	0	0		?	WBGene00015926;WBGene00009226	C17H11.6b;F28G4.1	NA;NA
TSPOP270	2	2	2	2	2,3	?	WBGene00009551;WBGene00011722	F38H4.10;T11G6.8a	CEOP4480;CEOP4396
TSPOP271	2	2	1	1	2	1,NA	WBGene00011016;WBGene00018076	R04F11.3;F35H12.4	CEOP5344;NA
TSPOP272	2	2	1	1	2	1,NA	WBGene00011016;WBGene00018860	R04F11.3;F55A4.8d	CEOP5344;NA
TSPOP273	2	2	1	1	6	1,NA	WBGene00013804;WBGene00010386	Y116A8C.27a;H12D21.10a	CEOP4596;NA
TSPOP274	2	2	1	1	5	1,NA	WBGene00008236;WBGene00007784	C50F4.12;C27H6.2	CEOP5232;NA
TSPOP275	2	2	1	1	2	1,NA	WBGene00013236;WBGene00000800	Y56A3A.18;Y23H5A.7c	CEOP3740;NA
TSPOP276	2	2	1	1	2	1,NA	WBGene00017919;WBGene00016611	F29B9.1;C43G2.2b	CEOP4136;NA
TSPOP277	2	2	2	2	4,3	?	WBGene00006931;WBGene00008685	T20D3.7d;F11A10.4a	CEOP4328;CEOP4492
TSPOP278	2	2	1	1	2	1,NA	WBGene00022056;WBGene00015913	Y67D2.6;C17F4.7	CEOP3860;NA
TSPOP279	2	2	1	1	3	1,NA	WBGene00009992;WBGene00000478	F53F4.10;F27E11.3	CEOP5392;NA
TSPOP28	2	2	2	2	6,3	?	WBGene00018070;WBGene00004278	F35H10.5;Y62E10A.9	CEOP4280;CEOP4544
TSPOP280	2	2	1	1	2	1,NA	WBGene00011017;WBGene00018181	R04F11.5;F38E1.9	CEOP5344;NA
TSPOP281	2	2	0	0		?	WBGene00013093;WBGene00021292	Y51H1A.2e;Y25C1A.5	NA;NA
TSPOP282	2	2	1	1	2	1,NA	WBGene00013789;WBGene00002163	Y116A8C.9a;C54D1.3c	CEOP4592;NA
TSPOP283	2	2	0	0		?	WBGene00009145;WBGene00003411	F26A3.7;F14F4.3	NA;NA
TSPOP284	3	3	1	1	2	1,NA,NA	WBGene00022296;WBGene00018135;WBGene00019953	Y76B12C.2;F37A4.5;R08C7.10b	CEOP4056;NA;NA
TSPOP285	2	2	1	1	2	1,NA	WBGene00003582;WBGene00008430	F52G2.1c;D2085.5b	CEOP4556;NA
TSPOP286	2	2	1	1	6	1,NA	WBGene00004882;WBGene00017241	F46B6.3b;F08C6.2b	CEOP5236;NA
TSPOP287	2	2	2	1	2	reversed	WBGene00007114;WBGene00007113	B0035.16;B0035.15	CEOP4428;CEOP4428
TSPOP288	2	2	1	1	3	1,NA	WBGene00013434;WBGene00009211	Y66D12A.8a;F28D1.1	CEOP3723;NA
TSPOP289	2	2	1	1	2	1,NA	WBGene00010725;WBGene00007531	K09E9.2;C11H1.7a	CEOPX156;NA
TSPOP29	2	1	1	1	3	?	WBGene00022803	ZK688.9	CEOP3462
TSPOP290	2	1	0	0		?	WBGene00019148	H03E18.1	NA
TSPOP291	2	2	0	0		?	WBGene00003562;WBGene00009793	F09G8.4;F46F6.2a	NA;NA
TSPOP292	2	2	1	1	2	1,NA	WBGene00003064;WBGene00022269	R10H10.1;Y73E7A.2	CEOP4376;NA
TSPOP293	2	2	0	0		?	WBGene00007179;WBGene00006836	B0457.4;C47E8.7	NA;NA
TSPOP294	3	2	0	0		?	WBGene00019414;WBGene00008785	K05F6.3;F14B6.4	NA;NA
TSPOP295	2	2	1	1	2	1,NA	WBGene00015513;WBGene00017814	C06A8.2;F26A10.2	CEOP2731;NA
TSPOP296	2	2	0	0		?	WBGene00044732;WBGene00000911	T03G11.10;C10C5.6b	NA;NA
TSPOP297	2	2	1	1	4	1,NA	WBGene00013218;WBGene00012830	Y54G11A.9;Y43F8C.8	CEOP2636;NA
TSPOP298	2	2	0	0		?	WBGene00002074;WBGene00005149	F32E10.4;B0495.1	NA;NA
TSPOP299	2	2	0	0		?	WBGene00007260;WBGene00004854	C02C6.2a;F40E10.4	NA;NA
TSPOP3	2	2	1	1	2	1,NA	WBGene00007528;WBGene00014215	C11H1.2;ZK1086.1b	CEOPX134;NA
TSPOP30	2	1	1	1	3	?	WBGene00007101	B0024.11	CEOP5252
TSPOP300	2	1	1	1	2	?	WBGene00021348	Y37E3.4	CEOP1028
TSPOP301	2	2	0	0		?	WBGene00016406;WBGene00002031	C34D10.1;Y34B4A.3	NA;NA
TSPOP302	2	2	2	2	2,2	?	WBGene00020909;WBGene00011239	W01A11.1a;R11A8.5	CEOP5118;CEOP4372
TSPOP303	2	1	1	1	2	?	WBGene00017016	D1014.3a	CEOP5180
TSPOP304	2	2	0	0		?	WBGene00010699;WBGene00016678	K08H10.9;C45G9.7	NA;NA
TSPOP305	2	2	1	1	2	1,NA	WBGene00015579;WBGene00017085	C07H6.2;E01A2.2a	CEOP3849;NA
TSPOP306	2	2	1	1	4	1,NA	WBGene00018610;WBGene00017313	F48E8.3;F09G2.4	CEOP3304;NA
TSPOP307	2	2	1	1	2	1,NA	WBGene00016496;WBGene00011175	C37C3.2;R09E10.5	CEOP5611;NA
TSPOP308	2	2	2	2	2,2	?	WBGene00013332;WBGene00010037	Y57G11C.43;F54C8.4a	CEOP4667;CEOP3580
TSPOP309	2	2	2	2	3,3	?	WBGene00011067;WBGene00007760	R06F6.2;C27B7.2	CEOP2504;CEOP4312
TSPOP31	2	2	2	1	4	reversed	WBGene00018356;WBGene00004055	F42G8.5;B0218.3	CEOP4272;CEOP4272
TSPOP310	2	2	1	1	3	1,NA	WBGene00017062;WBGene00007980	D2063.3a;C36E8.1	CEOP5052;NA
TSPOP311	2	1	0	0		?	WBGene00011834	T19B10.6	NA
TSPOP312	2	2	1	1	2	1,NA	WBGene00010231;WBGene00003394	F58B3.4;T07H6.2	CEOP4460;NA
TSPOP313	2	2	1	1	3	1,NA	WBGene00004205;WBGene00004446	F29B9.4b;T24B8.1a	CEOP4128;NA
TSPOP314	2	1	1	1	2	?	WBGene00017360	F10E9.11	CEOP3504
TSPOP315	3	3	3	2	3,2	?	WBGene00011334;WBGene00010993;WBGene00006369	T01E8.6;R03E1.2;R03E1.1	CEOP2472;CEOPX128;CEOPX128
TSPOP316	2	2	1	1	4	1,NA	WBGene00006446;WBGene00009200	F28F8.6;F28C1.1	CEOP5444;NA
TSPOP318	2	2	1	1	4	1,NA	WBGene00021377;WBGene00019825	Y37E11B.5;R02D3.8	CEOP4100;NA
TSPOP319	2	1	1	1	2	?	WBGene00006626	F10G7.2	CEOP2132
TSPOP32	2	2	0	0		?	WBGene00010488;WBGene00011071	K02A11.3;R06F6.8b	NA;NA
TSPOP320	2	2	1	1	2	1,NA	WBGene00006647;WBGene00019998	F53G2.6b;R10H1.1	CEOP2070;NA
TSPOP321	2	2	1	1	2	1,NA	WBGene00019333;WBGene00016331	K02F3.10;C32F10.1b	CEOP3040;NA
TSPOP322	2	2	0	0		?	WBGene00000368;WBGene00010933	T28F2.5;M162.7	NA;NA
TSPOP324	3	3	2	1	5	2,1,NA	WBGene00019006;WBGene00019005;WBGene00007953	F57B10.9;F57B10.8;C35A5.9	CEOP1332;CEOP1332;NA
TSPOP325	2	1	0	0		?	WBGene00013151	Y53F4B.4b	NA
TSPOP326	2	2	2	1	2	reversed	WBGene00013994;WBGene00003074	ZK524.4;ZK524.3a	CEOP1396;CEOP1396
TSPOP327	2	2	2	2	2,4	?	WBGene00017919;WBGene00017283	F29B9.1;F09E5.3	CEOP4136;CEOP2168
TSPOP328	2	2	2	1	3	reversed	WBGene00016622;WBGene00016621	C43H8.2;C43H8.1	CEOP1628;CEOP1628
TSPOP329	2	1	1	1	2	?	WBGene00013344	Y59A8B.7	CEOP5464
TSPOP33	2	2	0	0		?	WBGene00006619;WBGene00008029	ZK546.15;C39E9.5	NA;NA
TSPOP330	2	1	0	0		?	WBGene00008136	C47D12.2	NA
TSPOP331	2	2	0	0		?	WBGene00006876;WBGene00001534	ZK1151.1b;F52E1.4a	NA;NA
TSPOP332	2	1	0	0		?	WBGene00022171	Y71H2AM.6a	NA
TSPOP333	3	3	1	1	5	1,NA,NA	WBGene00015191;WBGene00009443;WBGene00022277	B0432.10;F35G12.7;Y74C9A.3	CEOP2020;NA;NA
TSPOP334	3	3	2	1	2	2,1,NA	WBGene00007194;WBGene00007189;WBGene00004790	B0491.7;B0491.1;F07H5.2	CEOP2532;CEOP2532;NA
TSPOP335	2	2	2	1	3	identical	WBGene00006919;WBGene00018512	F46F11.5;F46F11.9a	CEOP1264;CEOP1264
TSPOP336	2	2	0	0		?	WBGene00001209;WBGene00017066	C27D11.1;D2092.5	NA;NA
TSPOP337	2	2	2	1	3	identical	WBGene00009285;WBGene00009286	F31C3.3;F31C3.4	CEOP1776;CEOP1776
TSPOP338	2	2	0	0		?	WBGene00000938;WBGene00016002	C26C6.5a;C18H9.3c	NA;NA
TSPOP339	2	1	0	0		?	WBGene00015522	C06E1.7	NA
TSPOP34	2	2	0	0		?	WBGene00021920;WBGene00021930	Y55F3AM.1;Y55F3AM.13	NA;NA
TSPOP340	2	2	0	0		?	WBGene00017098;WBGene00015125	E02D9.1c;B0303.3	NA;NA
TSPOP341	2	2	1	1	3	1,NA	WBGene00000426;WBGene00004888	Y106G6E.5b;K12C11.2	CEOP1592;NA
TSPOP342	2	2	1	1	2	1,NA	WBGene00007009;WBGene00021931	Y65B4BR.4d;Y55F3AM.14	CEOP1934;NA
TSPOP343	2	2	2	1	4	reversed	WBGene00011058;WBGene00006958	R06C1.2;R06C1.3a	CEOP1660;CEOP1660
TSPOP344	2	2	1	1	2	1,NA	WBGene00001056;WBGene00016494	K02F2.1b;C37A2.8a	CEOP1999;NA
TSPOP345	2	1	1	1	2	?	WBGene00017929	F29C4.7b	CEOP4004
TSPOP346	2	2	2	1	3	identical	WBGene00008133;WBGene00008134	C47B2.7b;C47B2.9	CEOP1786;CEOP1786
TSPOP347	2	2	2	2	2,3	?	WBGene00013237;WBGene00009277	Y56A3A.19;F30F8.10b	CEOP3738;CEOP1424
TSPOP348	3	3	2	2	2,2	?	WBGene00020441;WBGene00020286;WBGene00004478	T12A2.7;T06A10.3a;F40F8.10	CEOP3360;CEOP4668;NA
TSPOP349	2	2	1	1	2	1,NA	WBGene00003148;WBGene00022733	H21P03.1;ZK418.3	CEOP4444;NA
TSPOP35	2	2	2	1	2	reversed	WBGene00009726;WBGene00000222	F45E6.3;F45E6.2	CEOPX108;CEOPX108
TSPOP350	2	2	1	1	2	1,NA	WBGene00021854;WBGene00012398	Y54F10AR.1;Y6E2A.4	CEOP3861;NA
TSPOP351	2	1	1	1	2	?	WBGene00011867	T20G5.1	CEOP3858
TSPOP352	2	2	1	1	3	1,NA	WBGene00012645;WBGene00018213	Y39A1A.6;F39H12.2	CEOP3688;NA
TSPOP353	3	3	2	2	2,5	?	WBGene00021714;WBGene00001740;WBGene00004130	Y49F6B.1;ZC395.6;F54E2.3j	CEOP2108;CEOP3272;NA
TSPOP354	2	2	1	1	2	1,NA	WBGene00015466;WBGene00008225	C05C8.9a;C50B8.3	CEOP5152;NA
TSPOP355	2	2	2	1	2	identical	WBGene00019076;WBGene00019077	F59A3.3;F59A3.4	CEOP1256;CEOP1256
TSPOP356	2	2	0	0		?	WBGene00009099;WBGene00009920	F25B3.2;F52B5.1b	NA;NA
TSPOP357	2	2	1	1	2	1,NA	WBGene00009050;WBGene00004368	F22D6.2;C32E8.7	CEOP1364;NA
TSPOP358	3	3	1	1	2	1,NA,NA	WBGene00003794;WBGene00010941;WBGene00000417	Y41D4B.19b;M176.2;C48D1.2b	CEOP4615;NA;NA
TSPOP359	2	2	2	1	3	reversed	WBGene00013670;WBGene00000158	Y105E8A.10c;Y105E8A.9	CEOP1904;CEOP1904
TSPOP36	2	2	1	1	3	1,NA	WBGene00001497;WBGene00019928	T08B2.9b;R07C3.12	CEOP1312;NA
TSPOP360	2	1	0	0		?	WBGene00006824	Y105E8A.6	NA
TSPOP361	2	1	1	1	2	?	WBGene00006751	C32E8.10d	CEOP1112
TSPOP362	2	2	1	1	2	1,NA	WBGene00009452;WBGene00003953	F36A2.2;F39H11.5	CEOP1504;NA
TSPOP363	2	1	0	0		?	WBGene00007705	C25A1.1	NA
TSPOP364	2	1	1	1	2	?	WBGene00004034	F09E5.1	CEOP2745
TSPOP365	2	2	1	1	2	1,NA	WBGene00022045;WBGene00016331	Y66H1A.3;C32F10.1a	CEOP4028;NA
TSPOP366	2	2	1	1	3	1,NA	WBGene00011065;WBGene00010416	R06C7.6;H25P06.1	CEOP1380;NA
TSPOP367	2	1	1	1	4	?	WBGene00018149	F37C12.1	CEOP3416
TSPOP368	2	2	1	1	2	1,NA	WBGene00009563;WBGene00010730	F39H2.3;K10C3.2	CEOP1496;NA
TSPOP369	2	2	1	1	4	1,NA	WBGene00010437;WBGene00022199	JC8.5a;Y71H10A.1a	CEOP4536;NA
TSPOP37	3	2	1	1	2	1,NA	WBGene00006590;WBGene00018700	ZC395.3a;F52E1.13f	CEOP3280;NA
TSPOP370	2	2	0	0		?	WBGene00009162;WBGene00001045	F26E4.7a;Y47H9C.5a	NA;NA
TSPOP371	2	1	0	0		?	WBGene00007744	C26D10.3	NA
TSPOP372	2	2	0	0		?	WBGene00019673;WBGene00001037	K12C11.1a;T05C3.5	NA;NA
TSPOP373	2	2	1	1	2	1,NA	WBGene00004895;WBGene00021536	CC4.3;Y42H9AR.1	CEOP1682;NA
TSPOP374	2	2	1	1	1	1,NA	WBGene00020955;WBGene00044763	W02G9.5c;ZK688.12	CEOP5531;NA
TSPOP375	2	2	1	1	4	1,NA	WBGene00011972;WBGene00004194	T23G11.7b;C34C6.6a	CEOP1416;NA
TSPOP376	2	2	1	1	2	1,NA	WBGene00011272;WBGene00012735	R53.2;Y40B1A.4	CEOP2746;NA
TSPOP377	2	2	1	1	2	1,NA	WBGene00017924;WBGene00009307	F29B9.10;F32A11.1	CEOP4132;NA
TSPOP378	2	2	0	0		?	WBGene00004807;WBGene00004809	F46A9.5;F44G3.6	NA;NA
TSPOP379	2	2	2	2	3,2	?	WBGene00010731;WBGene00013041	K10C3.4a;Y49E10.22	CEOP1566;CEOP3893
TSPOP38	3	3	1	1	1	1,NA,NA	WBGene00016592;WBGene00009811;WBGene00003084	C42C1.15;F47B8.10;R160.7	CEOP4508;NA;NA
TSPOP380	2	2	0	0		?	WBGene00006062;WBGene00000792	F30A10.8;F11C7.4	NA;NA
TSPOP381	2	1	0	0		?	WBGene00021095	W08F4.6	NA
TSPOP382	2	2	0	0		?	WBGene00006807;WBGene00022744	C17D12.2c;ZK470.1	NA;NA
TSPOP383	2	2	1	1	3	1,NA	WBGene00012964;WBGene00000776	Y48A6B.3;T03E6.7a	CEOP3712;NA
TSPOP384	2	1	0	0		?	WBGene00000197	F28H1.3	NA
TSPOP385	2	2	2	1	3	reversed	WBGene00021683;WBGene00000812	Y48G1C.10a;Y48G1C.2a	CEOP1940;CEOP1940
TSPOP386	3	2	1	1	7	1,NA	WBGene00000796;WBGene00022647	C14A4.4a;ZK54.1a	CEOP2496;NA
TSPOP387	2	2	0	0		?	WBGene00009626;WBGene00006657	F42A8.1;T12C9.3f	NA;NA
TSPOP388	2	2	1	1	2	1,NA	WBGene00000549;WBGene00001771	R107.6b;T28A11.11	CEOP3572;NA
TSPOP389	4	4	2	2	3,5	?	WBGene00009187;WBGene00016142;WBGene00013043;WBGene00019143	F27D4.1;C26E6.6;Y49E10.24a;H01M10.1	CEOP1989;CEOP3244;NA;NA
TSPOP39	2	2	1	1	2	1,NA	WBGene00022044;WBGene00006578	Y66H1A.2a;F25H2.1	CEOP4028;NA
TSPOP390	2	2	1	1	2	1,NA	WBGene00017088;WBGene00013852	E01A2.6;ZC101.3	CEOP1892;NA
TSPOP391	2	2	2	2	2,2	?	WBGene00011629;WBGene00004355	T08G11.1b;T07D4.3a	CEOP1508;CEOP2706
TSPOP392	2	1	1	1	4	?	WBGene00010766	K11B4.1	CEOP1764
TSPOP393	2	2	2	1	7	identical	WBGene00007556;WBGene00007564	C14A4.3;C14A4.14	CEOP2496;CEOP2496
TSPOP394	2	1	0	0		?	WBGene00011580	T07D4.4e	NA
TSPOP395	2	1	0	0		?	WBGene00003928	ZK945.2	NA
TSPOP396	2	2	2	2	4,3	?	WBGene00001486;WBGene00009002	F59G1.7;F21C3.3	CEOP2232;CEOP1384
TSPOP397	2	2	2	1	2	identical	WBGene00005025;WBGene00016889	C52E12.3;C52E12.4	CEOP2276;CEOP2276
TSPOP398	2	1	1	1	2	?	WBGene00008078	C44B9.1	CEOP3813
TSPOP4	3	3	2	2	3,2	?	WBGene00008364;WBGene00007752;WBGene00012927	D1046.3;C26H9A.2d;Y47D3A.14	CEOP4316;CEOP4654;NA
TSPOP40	2	2	2	2	2,2	?	WBGene00018161;WBGene00001372	F38A5.2b;R09B3.1a	CEOP4184;CEOP1656
TSPOP400	2	2	1	1	2	1,NA	WBGene00010736;WBGene00023462	K10C8.3c;C09G12.10	CEOP5364;NA
TSPOP401	2	2	2	2	2,2	?	WBGene00011352;WBGene00006963	T01H8.1e;K07G5.2	CEOP1937;CEOP1911
TSPOP402	2	2	1	1	2	1,NA	WBGene00022450;WBGene00013902	Y110A2AM.3a;ZC455.1a	CEOP2074;NA
TSPOP403	2	2	0	0		?	WBGene00009217;WBGene00007302	F28D1.8;C04F12.8	NA;NA
TSPOP404	2	2	1	1	2	1,NA	WBGene00006833;WBGene00019491	F53F10.4c;K07E3.2	CEOP1116;NA
TSPOP405	2	2	2	1	6	identical	WBGene00003390;WBGene00019221	H20J04.8;H20J04.6	CEOP2124;CEOP2124
TSPOP406	2	1	1	1	5	?	WBGene00008458	E02H1.6	CEOP2436
TSPOP407	2	1	1	1	2	?	WBGene00007603	C15C6.4	CEOP1664
TSPOP408	2	1	0	0		?	WBGene00017904	F28F5.3c	NA
TSPOP41	2	2	2	1	2	identical	WBGene00003061;WBGene00022835	ZK973.10;ZK973.9	CEOP1176;CEOP1176
TSPOP410	2	1	0	0		?	WBGene00009552	F39B1.1	NA
TSPOP411	2	2	2	2	4,2	?	WBGene00006946;WBGene00012714	C34E10.4b;Y39E4B.1	CEOP3268;CEOP3819
TSPOP412	2	2	0	0		?	WBGene00011441;WBGene00016674	T04F8.2;C45G9.2	NA;NA
TSPOP413	2	2	0	0		?	WBGene00000959;WBGene00000817	F46H6.2a;B0547.1	NA;NA
TSPOP414	2	1	0	0		?	WBGene00019627	K10D2.1a	NA
TSPOP415	1	1	1	1	4	?	WBGene00000202	Y6D11A.1	CEOP3044
TSPOP416	2	2	0	0		?	WBGene00005950;WBGene00021929	T07H8.3;Y55F3AM.12	NA;NA
TSPOP417	2	2	1	1	2	1,NA	WBGene00000184;WBGene00004298	Y116A8C.12;W06D4.6	CEOP4669;NA
TSPOP418	2	2	2	2	3,4	?	WBGene00013361;WBGene00010721	Y60A3A.13c;K09E4.3a	CEOP5496;CEOP2628
TSPOP419	2	2	1	1	2	1,NA	WBGene00006708;WBGene00021883	Y54G2A.31;Y54G2A.18	CEOP4072;NA
TSPOP42	2	2	2	2	2,4	?	WBGene00013920;WBGene00019535	ZC506.3;K08D10.12a	CEOPX107;CEOP4116
TSPOP420	2	1	0	0		?	WBGene00000162	W09G10.4a	NA
TSPOP421	2	2	2	2	4,4	?	WBGene00016412;WBGene00016390	C34E10.11;C34B2.5	CEOP3268;CEOP1636
TSPOP422	2	1	0	0		?	WBGene00009881	F49C12.12a	NA
TSPOP423	2	2	0	0		?	WBGene00016758;WBGene00018193	C49A9.4;F39C12.1	NA;NA
TSPOP424	2	2	0	0		?	WBGene00005662;WBGene00002804	W03B1.4a;Y110A7A.19	NA;NA
TSPOP425	2	2	2	1	2	reversed	WBGene00012756;WBGene00001235	Y41C4A.9;Y41C4A.10	CEOP3728;CEOP3728
TSPOP426	2	2	1	1	5	1,NA	WBGene00021758;WBGene00009978	Y50D7A.10;F53E4.1b	CEOP3851;NA
TSPOP427	3	2	2	2	3,3	?	WBGene00006997;WBGene00021208	ZK546.1d;Y18H1A.2a	CEOP2690;CEOP1014
TSPOP428	2	2	0	0		?	WBGene00002228;WBGene00012739	C06G3.2;Y40B1B.7	NA;NA
TSPOP429	1	1	0	0		?	WBGene00016456	C35E7.4	NA
TSPOP43	2	2	2	2	2,3	?	WBGene00001566;WBGene00021904	C28C12.9;Y55B1AL.2	CEOP4292;CEOP3828
TSPOP430	1	1	1	1	5	?	WBGene00007201	B0564.1a	CEOP4532
TSPOP431	2	1	1	1	2	?	WBGene00017088	E01A2.6	CEOP1892
TSPOP432	1	1	0	0		?	WBGene00000100	C25A11.4m	NA
TSPOP433	2	2	1	1	4	1,NA	WBGene00006946;WBGene00017922	C34E10.4b;F29B9.7	CEOP3268;NA
TSPOP434	2	1	1	1	5	?	WBGene00001823	ZC395.7	CEOP3272
TSPOP435	2	1	0	0		?	WBGene00011280	R74.6	NA
TSPOP436	2	1	1	1	4	?	WBGene00017889	F28B3.10	CEOP1208
TSPOP437	2	2	2	2	4,2	?	WBGene00006946;WBGene00012714	C34E10.4b;Y39E4B.1	CEOP3268;CEOP3819
TSPOP438	2	2	2	1	3	identical	WBGene00008006;WBGene00008008	C38D4.5b;C38D4.9	CEOP3220;CEOP3220
TSPOP439	1	1	0	0		?	WBGene00003412	F20B6.3	NA
TSPOP44	2	2	2	2	2,2	?	WBGene00018513;WBGene00011776	F46F11.10;T14G10.7	CEOP1272;CEOP4356
TSPOP440	2	2	2	2	4,3	?	WBGene00000838;WBGene00022759	Y108G3AL.1b;ZK546.2b	CEOP5588;CEOP2690
TSPOP441	2	2	1	1	2	1,NA	WBGene00013997;WBGene00235263	ZK550.3;Y66H1A.8b	CEOP4600;NA
TSPOP442	2	2	2	2	6,3	?	WBGene00020110;WBGene00015353	R151.7b;C02F5.13	CEOP3424;CEOP3496
TSPOP45	2	2	2	2	2,5	?	WBGene00014938;WBGene00016375	Y62E10A.11;C33H5.8	CEOP4548;CEOP4252
TSPOP46	2	2	2	2	3,3	?	WBGene00006392;WBGene00015793	K03B4.3a;C15C7.7	CEOP5060;CEOPX040
TSPOP47	2	2	1	1	2	1,NA	WBGene00011941;WBGene00010033	T23B5.4a;F54B11.10	CEOP4654;NA
TSPOP48	4	3	2	2	3,4	?	WBGene00004424;WBGene00011860;WBGene00006393	JC8.3a;T20D3.8;F48D6.1	CEOP4535;CEOP4328;NA
TSPOP49	2	2	1	1	4	1,NA	WBGene00007616;WBGene00007882	C15H11.8;C33A12.3a	CEOP5416;NA
TSPOP5	2	2	1	1	4	1,NA	WBGene00013462;WBGene00018740	Y67H2A.4d;F53B3.1	CEOP4538;NA
TSPOP50	2	1	0	0		?	WBGene00006460;WBGene00006460	F25D1.1c;F25D1.1b	NA;NA
TSPOP51	2	2	2	2	3,3	?	WBGene00021515;WBGene00019822	Y41D4B.12a;R02D3.4b	CEOP4047;CEOP4008
TSPOP52	2	2	2	2	6,3	?	WBGene00015238;WBGene00013376	B0511.13b;Y62E10A.6	CEOP1632;CEOP4540
TSPOP53	2	2	2	2	3,2	?	WBGene00017999;WBGene00016740	F33D4.7;C48B6.2	CEOP4240;CEOP1356
TSPOP54	2	1	1	1	5	?	WBGene00044325	C33H5.19	CEOP4252
TSPOP55	2	2	2	2	2,2	?	WBGene00013176;WBGene00020215	Y53F4B.39a;T04G9.4	CEOP2660;CEOPX147
TSPOP56	5	5	3	3	2,2,2	?	WBGene00021715;WBGene00018723;WBGene00000764;WBGene00004482;WBGene00001808	Y49F6B.2;F53A3.7;T03F1.2;C16A3.9;T10G3.6a	CEOP2108;CEOP3845;CEOP1124;NA;NA
TSPOP57	2	2	0	0		?	WBGene00006760;WBGene00044620	H14N18.1b;T22B11.2	NA;NA
TSPOP58	2	2	0	0		?	WBGene00022173;WBGene00013963	Y71H2AM.8;ZK287.2a	NA;NA
TSPOP59	2	2	1	1	2	1,NA	WBGene00007588;WBGene00020365	C14C10.5b;T08G2.2	CEOP5574;NA
TSPOP6	2	2	2	1	3	identical	WBGene00008006;WBGene00008008	C38D4.5a;C38D4.9	CEOP3220;CEOP3220
TSPOP60	2	2	1	1	3	1,NA	WBGene00011122;WBGene00018994	R07H5.2a;F56H1.3	CEOP4424;NA
TSPOP61	2	2	1	1	4	1,NA	WBGene00015091;WBGene00003062	B0261.1;K09H9.6	CEOP1228;NA
TSPOP63	2	2	0	0		?	WBGene00022172;WBGene00003008	Y71H2AM.7;Y54G2A.1	NA;NA
TSPOP64	3	3	2	2	5,6	?	WBGene00013678;WBGene00044310;WBGene00020471	Y105E8A.20b;H20J04.9;T13B5.3	CEOP1736;CEOP2124;NA
TSPOP65	2	2	0	0		?	WBGene00020437;WBGene00008927	T12A2.2;F17H10.3b	NA;NA
TSPOP66	2	1	1	1	4	?	WBGene00016392	C34B2.7	CEOP1636
TSPOP67	2	2	1	1	2	1,NA	WBGene00015159;WBGene00043705	B0361.5b;Y55F3AM.7a	CEOP3833;NA
TSPOP68	2	2	2	1	2	reversed	WBGene00008452;WBGene00004759	E02A10.1;F45D3.5	CEOP5356;CEOP5356
TSPOP69	2	2	0	0		?	WBGene00021899;WBGene00018547	Y54H5A.1;F47C12.2	NA;NA
TSPOP7	2	1	0	0		?	WBGene00004490	F37C12.11	NA
TSPOP70	2	2	0	0		?	WBGene00013477;WBGene00017268	Y69E1A.5;F08F8.2	NA;NA
TSPOP71	2	2	1	1	2	1,NA	WBGene00001366;WBGene00004276	C33D9.1c;K09A9.2	CEOP4610;NA
TSPOP72	2	1	0	0		?	WBGene00008746	F13E6.2	NA
TSPOP73	2	1	0	0		?	WBGene00006368	C54H2.1a	NA
TSPOP74	2	2	1	1	8	1,NA	WBGene00012996;WBGene00006512	Y48C3A.16;F18E2.2	CEOP2606;NA
TSPOP75	2	1	0	0		?	WBGene00007007	C44C8.6	NA
TSPOP76	2	2	1	1	2	1,NA	WBGene00021313;WBGene00012530	Y32H12A.5;Y32F6A.5b	CEOP3802;NA
TSPOP77	2	1	0	0		?	WBGene00009882	F49C12.13	NA
TSPOP78	4	4	1	1	2	1,NA,NA,NA	WBGene00001590;WBGene00019898;WBGene00008586;WBGene00006853	C45G3.3;R05G6.4;F08G12.2;C47G2.2	CEOP1986;NA;NA;NA
TSPOP79	2	1	1	1	2	?	WBGene00004031	T13F2.3b	CEOP4624
TSPOP8	2	2	1	1	3	1,NA	WBGene00004326;WBGene00019600	T20G5.11;K09H11.3	CEOP3660;NA
TSPOP80	2	1	1	1	2	?	WBGene00013144	Y53C12B.2	CEOP2452
TSPOP81	2	2	0	0		?	WBGene00007022;WBGene00012626	ZK970.3;Y38H6C.14	NA;NA
TSPOP82	2	2	2	2	2,2	?	WBGene00044077;WBGene00016194	T18H9.7a;C28H8.3	CEOP5220;CEOP3350
TSPOP83	2	2	1	1	2	1,NA	WBGene00018878;WBGene00012530	F55D10.3;Y32F6A.5b	CEOPX048;NA
TSPOP84	2	1	0	0		?	WBGene00002066	M110.4a	NA
TSPOP85	2	1	0	0		?	WBGene00006452;WBGene00006452	R148.6;R148.6	NA;NA
TSPOP86	3	3	0	0		?	WBGene00004979;WBGene00021281;WBGene00002162	F42G8.11;Y24D9A.1a;F42G8.12	NA;NA;NA
TSPOP87	2	2	2	2	4,3	?	WBGene00011634;WBGene00013406	T09A5.5;Y63D3A.7	CEOP2312;CEOP1731
TSPOP88	3	3	0	0		?	WBGene00010812;WBGene00011887;WBGene00007643	M01F1.6;T21B10.5a;C17E4.3	NA;NA;NA
TSPOP89	2	2	1	1	3	1,NA	WBGene00013587;WBGene00004188	Y80D3A.9;W07E6.4	CEOP5476;NA
TSPOP9	2	2	1	1	2	1,NA	WBGene00003389;WBGene00020562	K03H1.2;T19C3.4	CEOP3642;NA
TSPOP90	2	2	2	2	2,2	?	WBGene00000962;WBGene00000181	T21E12.4b;F01G4.2a	CEOP1994;CEOP4412
TSPOP91	2	1	0	0		?	WBGene00012814	Y43F8B.3e	NA
TSPOP92	2	1	0	0		?	WBGene00012814	Y43F8B.3e	NA
TSPOP93	2	1	0	0		?	WBGene00018468	F45E4.3e	NA
TSPOP94	2	2	1	1	3	1,NA	WBGene00010044;WBGene00019207	F54C9.9;H17B01.1a	CEOP2368;NA
TSPOP95	2	1	1	1	2	?	WBGene00002497	F52H3.1	CEOP2696
TSPOP96	2	2	1	1	8	1,NA	WBGene00138717;WBGene00003009	F52C12.6a;K10B2.1d	CEOP4052;NA
TSPOP97	2	2	1	1	2	1,NA	WBGene00004136;WBGene00012666	K11D12.2;Y39B6A.3a	CEOP5564;NA
TSPOP98	2	2	2	2	2,2	?	WBGene00022379;WBGene00001547	Y94H6A.7;T03D8.5c	CEOP4068;CEOP5581
TSPOP99	2	2	1	1	2	1,NA	WBGene00012037;WBGene00004403	T26E3.4;Y116A8C.16f	CEOP1672;NA

## Sheet: BT10u
T. spiralis operon	Genes	Homologous C. elegans genes	Homologous C. elegans operonic genes	C. elegans operons	C. elegans operon sizes	Synteny	C. elegans gene IDs	C. elegans gene names	C. elegans operon IDs
TSPOP1	2	1	1	1	8	?	WBGene00021655	Y48A5A.1	CEOP4052
TSPOP10	2	2	2	2	4,2	?	WBGene00008664;WBGene00006701	F10G8.6;C35B1.1	CEOP1584;CEOP4112
TSPOP100	2	2	2	2	4,2	?	WBGene00001860;WBGene00001635	F28B3.7a;Y45F10D.3b	CEOP1208;CEOP4560
TSPOP101	2	2	1	1	4	1,NA	WBGene00012643;WBGene00017605	Y39A1A.3;F19F10.9	CEOP3684;NA
TSPOP102	2	2	2	2	2,3	?	WBGene00009084;WBGene00006607	F23B12.7;F57B10.7	CEOP5420;CEOP1336
TSPOP103	2	2	2	2	6,6	?	WBGene00006489;WBGene00019163	ZK856.9;H06H21.6	CEOP5248;CEOP4152
TSPOP104	2	1	1	1	2	?	WBGene00010304	F59A2.4a	CEOP3108
TSPOP105	2	2	2	2	2,6	?	WBGene00002891;WBGene00019503	C56G2.6a;K07H8.1	CEOP3870;CEOP4280
TSPOP106	2	2	1	1	2	1,NA	WBGene00001983;WBGene00009131	E04A4.4b;F25H8.1b	CEOP4144;NA
TSPOP107	2	1	0	0		?	WBGene00044637	Y47D7A.16a	NA
TSPOP108	2	2	2	2	3,3	?	WBGene00007387;WBGene00007020	C06H2.3a;Y104H12D.1a	CEOP5276;CEOP4049
TSPOP109	2	2	0	0		?	WBGene00014095;WBGene00010134	ZK829.4;F55H12.3	NA;NA
TSPOP11	2	2	2	2	2,3	?	WBGene00022793;WBGene00012966	ZK686.3;Y48A6B.5	CEOP3452;CEOP3712
TSPOP110	2	2	1	1	3	1,NA	WBGene00006957;WBGene00016844	C07G1.4a;C50F7.4	CEOP4274;NA
TSPOP111	2	2	0	0		?	WBGene00008281;WBGene00013455	C53D6.4b;Y67A10A.6c	NA;NA
TSPOP112	2	2	0	0		?	WBGene00014666;WBGene00003963	C05D12.3a;C07A12.4a	NA;NA
TSPOP113	2	2	0	0		?	WBGene00007652;WBGene00004738	C17G1.5;F18E2.3	NA;NA
TSPOP114	2	2	2	2	2,4	?	WBGene00017928;WBGene00022456	F29C4.6;Y110A7A.6b	CEOP4004;CEOP1220
TSPOP115	2	2	1	1	2	1,NA	WBGene00013301;WBGene00022232	Y57G11C.3b;Y73B6BL.3	CEOP4667;NA
TSPOP116	2	1	0	0		?	WBGene00001169;WBGene00001169	R03G5.1d;R03G5.1a	NA;NA
TSPOP117	3	3	2	2	3,6	?	WBGene00013378;WBGene00018072;WBGene00019899	Y62E10A.10;F35H10.7a;R05G6.5	CEOP4544;CEOP4280;NA
TSPOP118	2	2	0	0		?	WBGene00020517;WBGene00010722	T15B7.2;K09E4.4	NA;NA
TSPOP119	2	2	2	2	4,3	?	WBGene00000761;WBGene00007111	C24A11.9;B0035.12	CEOP1248;CEOP4440
TSPOP12	2	2	2	1	6	identical	WBGene00006736;WBGene00020422	T10F2.3;T10F2.2	CEOP3260;CEOP3260
TSPOP120	2	2	0	0		?	WBGene00003657;WBGene00007880	C08F8.8;C33A12.1	NA;NA
TSPOP121	2	2	2	2	2,2	?	WBGene00009829;WBGene00003407	F47G9.1;F57C12.5c	CEOP5522;CEOPX154
TSPOP122	2	1	0	0		?	WBGene00022861	ZK1193.5a	NA
TSPOP123	2	2	0	0		?	WBGene00021012;WBGene00002140	W03G1.6c;C18H7.2b	NA;NA
TSPOP124	2	1	1	1	4	?	WBGene00006724	C08B11.7	CEOP2328
TSPOP125	2	2	2	2	3,3	?	WBGene00007645;WBGene00022121	C17E4.6;Y71F9AM.4a	CEOP1544;CEOP1076
TSPOP126	2	2	1	1	3	1,NA	WBGene00017646;WBGene00006772	F20H11.1;C50C3.9c	CEOP3392;NA
TSPOP127	2	2	2	1	3	identical	WBGene00003594;WBGene00013239	Y56A3A.13;Y56A3A.22	CEOP3744;CEOP3744
TSPOP128	2	2	2	2	2,3	?	WBGene00022380;WBGene00022381	Y94H6A.8;Y94H6A.9a	CEOP4068;CEOP4665
TSPOP129	2	2	1	1	2	1,NA	WBGene00011451;WBGene00017534	T04H1.5;F17A9.2	CEOP5336;NA
TSPOP13	2	2	2	2	3,2	?	WBGene00021133;WBGene00011144	W10D9.5a;R08D7.4b	CEOP2686;CEOP3560
TSPOP130	2	2	0	0		?	WBGene00017765;WBGene00017037	F25B4.1;D1069.3b	NA;NA
TSPOP131	2	2	1	1	3	1,NA	WBGene00044329;WBGene00018281	F11A10.8;F41D9.1	CEOP4490;NA
TSPOP132	2	2	1	1	2	1,NA	WBGene00004494;WBGene00022416	K02B2.5;Y102A11A.6	CEOP4611;NA
TSPOP133	2	2	1	1	6	1,NA	WBGene00020109;WBGene00011939	R151.6;T23B5.1a	CEOP3424;NA
TSPOP134	2	2	2	1	5	identical	WBGene00009648;WBGene00023422	F43C1.3;F43C1.6	CEOP3164;CEOP3164
TSPOP135	2	2	2	2	3,2	?	WBGene00003162;WBGene00008769	F20H11.3;F13G3.11	CEOP3392;CEOP1392
TSPOP136	2	2	2	1	3	identical	WBGene00006768;WBGene00014027	ZK637.8f;ZK637.9b	CEOP3556;CEOP3556
TSPOP137	2	2	1	1	3	1,NA	WBGene00006540;WBGene00009565	F58A4.8;F39H11.1	CEOP3608;NA
TSPOP138	2	1	0	0		?	WBGene00001281	F10B5.6	NA
TSPOP139	2	2	0	0		?	WBGene00219217;WBGene00008345	C08F8.15;C56A3.6c	NA;NA
TSPOP14	3	3	2	2	2,3	?	WBGene00011144;WBGene00022400;WBGene00010925	R08D7.4b;Y97E10AR.5;M153.2	CEOP3560;CEOP5172;NA
TSPOP140	2	1	1	1	2	?	WBGene00002002	K08E7.2	CEOP4520
TSPOP141	2	2	1	1	3	1,NA	WBGene00008684;WBGene00004228	F11A10.3a;R09H10.4	CEOP4490;NA
TSPOP142	3	2	1	1	7	1,NA	WBGene00009735;WBGene00022801	F45G2.9;ZK688.6a	CEOP3792;NA
TSPOP143	2	2	0	0		?	WBGene00006620;WBGene00002217	C07G1.1;F56E3.3c	NA;NA
TSPOP144	2	1	1	1	2	?	WBGene00000247	T19E7.3a	CEOP4172
TSPOP145	2	2	1	1	2	1,NA	WBGene00017734;WBGene00020216	F23C8.5a;T04G9.5	CEOP1044;NA
TSPOP146	2	2	2	2	2,3	?	WBGene00004759;WBGene00015207	F45D3.5;B0495.8a	CEOP5356;CEOP2308
TSPOP147	2	2	1	1	2	1,NA	WBGene00004430;WBGene00019492	Y45F10D.12;K07E3.4b	CEOP4560;NA
TSPOP148	2	2	1	1	3	1,NA	WBGene00015487;WBGene00003047	C05D11.10;T03F6.5	CEOP3372;NA
TSPOP149	2	2	0	0		?	WBGene00012600;WBGene00001793	Y38E10A.22a;Y46G5A.31	NA;NA
TSPOP15	2	2	2	2	1,2	?	WBGene00302986;WBGene00013317	Y37E11AM.4;Y57G11C.22a	CEOP5604;CEOP4661
TSPOP150	2	2	0	0		?	WBGene00018867;WBGene00022785	F55A12.10;ZK652.6a	NA;NA
TSPOP151	2	2	0	0		?	WBGene00003802;WBGene00020276	Y56A3A.17;T05H4.15c	NA;NA
TSPOP152	2	2	1	1	4	1,NA	WBGene00004095;WBGene00003975	F52C9.8f;T28D6.9	CEOP3284;NA
TSPOP153	2	2	1	1	2	1,NA	WBGene00009341;WBGene00012258	F32H2.4;W04G3.5a	CEOP1520;NA
TSPOP154	2	2	0	0		?	WBGene00022798;WBGene00008749	ZK688.3;F13E6.5	NA;NA
TSPOP155	2	2	1	1	2	1,NA	WBGene00018409;WBGene00001579	F44B9.8;F56A11.1	CEOP3472;NA
TSPOP156	2	1	1	1	2	?	WBGene00021021	W04B5.4	CEOP3076
TSPOP157	2	2	0	0		?	WBGene00019498;WBGene00010229	K07E8.7a;F58A4.6	NA;NA
TSPOP158	2	2	0	0		?	WBGene00016400;WBGene00007484	C34D4.4;C09G1.2	NA;NA
TSPOP159	2	2	2	2	2,2	?	WBGene00002185;WBGene00001258	T27E9.4a;Y80D3A.2e	CEOP3800;CEOP5472
TSPOP160	2	2	1	1	6	1,NA	WBGene00020636;WBGene00022664	T20H4.5;ZK121.2	CEOP3424;NA
TSPOP161	2	2	1	1	3	1,NA	WBGene00017981;WBGene00020687	F32D1.1a;T22D1.10	CEOP5052;NA
TSPOP162	2	1	0	0		?	WBGene00003020	C32F10.2	NA
TSPOP163	2	2	1	1	3	1,NA	WBGene00010230;WBGene00001596	F58A4.9;ZC308.1b	CEOP3608;NA
TSPOP164	2	1	1	1	3	?	WBGene00010479	K01G5.8a	CEOP3700
TSPOP165	3	3	1	1	3	1,NA,NA	WBGene00016990;WBGene00006786;WBGene00010283	CD4.4;Y60A3A.1;F58G11.6	CEOP5076;NA;NA
TSPOP166	2	2	0	0		?	WBGene00006786;WBGene00010283	Y60A3A.1;F58G11.6	NA;NA
TSPOP167	2	2	1	1	2	1,NA	WBGene00022599;WBGene00020088	ZC395.10;R119.2	CEOP3276;NA
TSPOP168	2	1	0	0		?	WBGene00007904	C33G3.4	NA
TSPOP169	2	2	1	1	3	1,NA	WBGene00012645;WBGene00019199	Y39A1A.6;H14E04.2b	CEOP3688;NA
TSPOP17	2	1	0	0		?	WBGene00017166	F01F1.12b	NA
TSPOP170	2	2	1	1	2	1,NA	WBGene00009284;WBGene00002071	F31C3.2b;T04G9.3	CEOP1965;NA
TSPOP171	2	2	1	1	2	1,NA	WBGene00017547;WBGene00000101	F18A1.6b;D1022.7c	CEOP2668;NA
TSPOP172	2	2	0	0		?	WBGene00001329;WBGene00016311	T04C10.2a;C32D5.3	NA;NA
TSPOP173	3	2	1	1	2	1,NA	WBGene00006840;WBGene00002008	R05D3.7;F43E2.8a	CEOP3512;NA
TSPOP174	2	1	1	1	2	?	WBGene00015133	B0303.15	CEOP3538
TSPOP175	2	2	0	0		?	WBGene00020160;WBGene00020397	T02C5.3b;T10B11.1	NA;NA
TSPOP176	2	2	0	0		?	WBGene00002179;WBGene00021074	T22C1.7;W07E6.2a	NA;NA
TSPOP177	2	2	1	1	2	1,NA	WBGene00013209;WBGene00019227	Y54G9A.6;H22K11.4a	CEOP2618;NA
TSPOP178	2	2	1	1	3	1,NA	WBGene00016754;WBGene00015168	C48E7.11;B0403.4	CEOP1316;NA
TSPOP179	2	2	1	1	4	1,NA	WBGene00012641;WBGene00016073	Y39A1A.1c;C24H12.4a	CEOP3684;NA
TSPOP18	2	2	1	1	3	1,NA	WBGene00011773;WBGene00011775	T14G10.3;T14G10.5d	CEOP4619;NA
TSPOP180	2	2	2	1	3	identical	WBGene00011730;WBGene00023450	T12D8.2;T12D8.10	CEOP3818;CEOP3818
TSPOP181	2	2	1	1	2	1,NA	WBGene00022697;WBGene00009288	ZK353.1a;F31C3.6a	CEOP3522;NA
TSPOP182	2	2	1	1	2	1,NA	WBGene00012768;WBGene00006634	Y41E3.10b;F33C8.3	CEOP4685;NA
TSPOP183	2	1	0	0		?	WBGene00010488;WBGene00010488	K02A11.3;K02A11.3	NA;NA
TSPOP184	2	2	2	2	3,2	?	WBGene00010325;WBGene00021844	F59C6.4;Y54E10BR.5	CEOP1616;CEOP1924
TSPOP185	2	2	2	2	3,4	?	WBGene00022188;WBGene00010615	Y71H2AR.1;K07A1.9f	CEOP3086;CEOP1552
TSPOP186	2	2	0	0		?	WBGene00002203;WBGene00006747	F46F2.2e;R07D5.1j	NA;NA
TSPOP187	2	1	2	1	2	1,1	WBGene00013803;WBGene00013803	Y116A8C.26b;Y116A8C.26a	CEOP4632;CEOP4632
TSPOP188	2	2	1	1	4	1,NA	WBGene00008667;WBGene00007969	F10G8.9b;C36A4.9b	CEOP1584;NA
TSPOP189	2	1	0	0		?	WBGene00010909	M88.7	NA
TSPOP19	2	1	1	1	6	?	WBGene00009771	F46B6.6a	CEOP5236
TSPOP190	2	2	0	0		?	WBGene00006780;WBGene00002977	B0350.2e;Y105E8A.7b	NA;NA
TSPOP191	2	2	1	1	4	1,NA	WBGene00019245;WBGene00001017	H27M09.1;ZK593.5e	CEOP1902;NA
TSPOP192	2	2	1	1	2	1,NA	WBGene00011631;WBGene00012144	T08G11.4b;T28H10.3	CEOP1508;NA
TSPOP193	2	2	1	1	2	1,NA	WBGene00020391;WBGene00022855	T10B5.5b;ZK1127.9b	CEOP5560;NA
TSPOP194	2	2	2	2	2,3	?	WBGene00011274;WBGene00007021	R53.5;C24H11.6	CEOP2734;CEOP3831
TSPOP195	2	2	0	0		?	WBGene00004180;WBGene00000875	F58A4.4a;K08E3.6	NA;NA
TSPOP196	2	2	1	1	4	1,NA	WBGene00007617;WBGene00016015	C15H11.9;C23G10.8	CEOP5416;NA
TSPOP197	2	2	0	0		?	WBGene00017758;WBGene00004873	F23H11.2;Y47D3A.26c	NA;NA
TSPOP198	2	2	2	1	2	identical	WBGene00004460;WBGene00016249	C30C11.2;C30C11.1	CEOP3528;CEOP3528
TSPOP199	2	2	1	1	3	1,NA	WBGene00018131;WBGene00021738	F37A4.1;Y50D4A.4a	CEOP3400;NA
TSPOP2	2	2	1	1	4	1,NA	WBGene00012641;WBGene00018793	Y39A1A.1c;F54C4.1	CEOP3684;NA
TSPOP20	2	2	2	1	5	reversed	WBGene00195239;WBGene00022852	ZK1127.13;ZK1127.5	CEOP2280;CEOP2280
TSPOP200	2	2	1	1	2	1,NA	WBGene00016591;WBGene00016469	C42C1.13b;C36B7.6	CEOP4504;NA
TSPOP201	2	2	2	2	3,2	?	WBGene00013735;WBGene00015160	Y111B2A.12b;B0361.6	CEOP3766;CEOP3833
TSPOP202	2	1	0	0		?	WBGene00008882	F16B12.6	NA
TSPOP203	2	2	1	1	2	1,NA	WBGene00000536;WBGene00017010	ZC395.2;D1007.15a	CEOP3280;NA
TSPOP204	2	2	1	1	4	1,NA	WBGene00015809;WBGene00021815	C16A3.4;Y53G8AR.8	CEOP3364;NA
TSPOP205	2	2	2	2	2,2	?	WBGene00022192;WBGene00014218	Y71H2B.2;ZK1098.1a	CEOP3853;CEOP3596
TSPOP206	2	1	1	1	2	?	WBGene00013237	Y56A3A.19	CEOP3738
TSPOP207	2	2	1	1	2	1,NA	WBGene00010757;WBGene00016503	K10G9.3b;C37C3.11	CEOP3890;NA
TSPOP208	3	3	2	1	2	2,1,NA	WBGene00010333;WBGene00003882;WBGene00007186	F59E10.3;F59E10.1;B0464.6	CEOP2508;CEOP2508;NA
TSPOP209	3	3	2	2	2,3	?	WBGene00021311;WBGene00019301;WBGene00003593	Y32H12A.2a;K02D10.1b;F42A10.2c	CEOP3292;CEOP3540;NA
TSPOP21	2	1	1	1	3	?	WBGene00003870	C18E9.11a	CEOP2404
TSPOP210	2	2	1	1	5	1,NA	WBGene00010809;WBGene00004255	M01F1.3;T20G5.5	CEOP3124;NA
TSPOP211	2	1	0	0		?	WBGene00000532	C07H4.2	NA
TSPOP212	2	2	2	2	2,2	?	WBGene00015648;WBGene00015173	C09F5.2a;B0412.3a	CEOP3859;CEOP3036
TSPOP213	2	2	1	1	3	1,NA	WBGene00010476;WBGene00003033	K01G5.1;F34D10.5	CEOP3701;NA
TSPOP214	4	4	3	2	5,3	?	WBGene00001660;WBGene00020189;WBGene00001661;WBGene00020443	C34E10.3;T03F1.7;C34E10.2;T12A2.15a	CEOP3272;CEOP1120;CEOP3272;NA
TSPOP215	2	2	1	1	3	1,NA	WBGene00006515;WBGene00015104	C05D11.3;B0280.9	CEOP3376;NA
TSPOP216	3	3	2	2	2,3	?	WBGene00022166;WBGene00022167;WBGene00006484	Y71H2AM.1;Y71H2AM.2;F08A8.6	CEOP5632;CEOP3086;NA
TSPOP217	2	2	1	1	2	1,NA	WBGene00020268;WBGene00002079	T05H4.5;Y48G1A.5a	CEOP5112;NA
TSPOP218	2	2	1	1	2	1,NA	WBGene00020268;WBGene00002079	T05H4.5;Y48G1A.5a	CEOP5112;NA
TSPOP219	2	2	1	1	2	1,NA	WBGene00012187;WBGene00001166	W01G7.3;ZK328.2	CEOP2624;NA
TSPOP22	2	2	2	2	3,6	?	WBGene00004278;WBGene00018070	Y62E10A.9;F35H10.5	CEOP4544;CEOP4280
TSPOP220	2	2	1	1	2	1,NA	WBGene00007912;WBGene00017963	C34B7.2;F31F4.17	CEOP1464;NA
TSPOP221	2	2	1	1	3	1,NA	WBGene00022402;WBGene00006780	Y97E10AR.7;B0350.2h	CEOP5172;NA
TSPOP222	3	3	1	1	2	1,NA,NA	WBGene00022576;WBGene00008240;WBGene00009966	ZC250.2;C50H2.4a;F53B7.3	CEOP5084;NA;NA
TSPOP223	2	2	1	1	2	1,NA	WBGene00010279;WBGene00000433	F58G11.1b;ZK265.4a	CEOP5398;NA
TSPOP224	2	2	2	2	3,2	?	WBGene00019460;WBGene00021350	K06H7.9;Y37E3.8a	CEOP3480;CEOP1032
TSPOP225	2	2	2	2	3,3	?	WBGene00003059;WBGene00004479	C48E7.3;D1007.6	CEOP1316;CEOP1184
TSPOP226	2	1	0	0		?	WBGene00003417	Y41C4A.14	NA
TSPOP227	2	2	1	1	2	1,NA	WBGene00001618;WBGene00002261	C43H6.9c;F58A3.1a	CEOPX032;NA
TSPOP228	2	2	1	1	3	1,NA	WBGene00016754;WBGene00014224	C48E7.11;ZK1098.7	CEOP1316;NA
TSPOP229	2	1	0	0		?	WBGene00007972;WBGene00007972	C36B1.5;C36B1.5	NA;NA
TSPOP23	2	1	1	1	3	?	WBGene00022803	ZK688.9	CEOP3462
TSPOP230	2	2	1	1	2	1,NA	WBGene00021363;WBGene00012550	Y37E11AL.8;Y37D8A.10	CEOP4653;NA
TSPOP231	2	2	0	0		?	WBGene00018872;WBGene00010496	F55C12.5a;K02B12.3	NA;NA
TSPOP232	2	2	2	2	1,4	?	WBGene00016427;WBGene00017293	C34H4.5a;F09E5.17	CEOP4631;CEOP2168
TSPOP233	2	2	0	0		?	WBGene00008860;WBGene00000377	F15D4.3;T05C12.7	NA;NA
TSPOP234	2	2	0	0		?	WBGene00006309;WBGene00013189	D1014.1;Y54E2A.4b	NA;NA
TSPOP235	2	2	0	0		?	WBGene00013702;WBGene00017178	Y106G6D.6;F02E8.5	NA;NA
TSPOP236	2	1	0	0		?	WBGene00007059	F08C6.3	NA
TSPOP237	2	2	0	0		?	WBGene00004377;WBGene00006856	F49E7.1a;C13B4.2	NA;NA
TSPOP238	2	2	1	1	2	1,NA	WBGene00020417;WBGene00008920	T10E9.7;F17C11.9a	CEOP1326;NA
TSPOP239	2	2	1	1	2	1,NA	WBGene00001151;WBGene00004488	F38H4.8a;T05F1.3	CEOP4660;NA
TSPOP24	2	1	1	1	3	?	WBGene00007101	B0024.11	CEOP5252
TSPOP240	2	2	2	2	2,3	?	WBGene00002363;WBGene00011722	F38H4.9;T11G6.8a	CEOP4480;CEOP4396
TSPOP241	2	2	1	1	2	1,NA	WBGene00011016;WBGene00018076	R04F11.3;F35H12.4	CEOP5344;NA
TSPOP242	2	2	1	1	2	1,NA	WBGene00011016;WBGene00018860	R04F11.3;F55A4.8b	CEOP5344;NA
TSPOP243	2	2	1	1	6	1,NA	WBGene00013804;WBGene00010386	Y116A8C.27a;H12D21.10a	CEOP4596;NA
TSPOP244	2	2	1	1	2	1,NA	WBGene00013236;WBGene00000800	Y56A3A.18;Y23H5A.7c	CEOP3740;NA
TSPOP245	2	2	1	1	2	1,NA	WBGene00017919;WBGene00016611	F29B9.1;C43G2.2b	CEOP4136;NA
TSPOP246	2	2	1	1	4	1,NA	WBGene00006931;WBGene00000302	T20D3.7b;C56A3.7c	CEOP4328;NA
TSPOP247	2	2	1	1	2	1,NA	WBGene00022056;WBGene00015913	Y67D2.6;C17F4.7	CEOP3860;NA
TSPOP248	2	2	1	1	3	1,NA	WBGene00009992;WBGene00000478	F53F4.10;F27E11.3	CEOP5392;NA
TSPOP249	2	2	1	1	2	1,NA	WBGene00011017;WBGene00018181	R04F11.5;F38E1.9	CEOP5344;NA
TSPOP25	2	2	0	0		?	WBGene00010488;WBGene00011071	K02A11.3;R06F6.8b	NA;NA
TSPOP250	2	2	0	0		?	WBGene00013093;WBGene00021292	Y51H1A.2e;Y25C1A.5	NA;NA
TSPOP251	2	2	1	1	2	1,NA	WBGene00013789;WBGene00002163	Y116A8C.9a;C54D1.3c	CEOP4592;NA
TSPOP252	2	2	0	0		?	WBGene00003411;WBGene00009145	F14F4.3;F26A3.7	NA;NA
TSPOP253	3	3	1	1	2	1,NA,NA	WBGene00022296;WBGene00018135;WBGene00019953	Y76B12C.2;F37A4.5;R08C7.10b	CEOP4056;NA;NA
TSPOP254	2	2	1	1	2	1,NA	WBGene00003582;WBGene00008430	F52G2.1c;D2085.5b	CEOP4556;NA
TSPOP255	2	2	1	1	6	1,NA	WBGene00004882;WBGene00017241	F46B6.3b;F08C6.2b	CEOP5236;NA
TSPOP256	2	2	2	1	2	identical	WBGene00007113;WBGene00007114	B0035.15;B0035.16	CEOP4428;CEOP4428
TSPOP257	2	1	0	0		?	WBGene00009211;WBGene00009211	F28D1.1;F28D1.1	NA;NA
TSPOP258	2	2	1	1	2	1,NA	WBGene00010725;WBGene00007531	K09E9.2;C11H1.7a	CEOPX156;NA
TSPOP259	2	1	0	0		?	WBGene00019148	H03E18.1	NA
TSPOP26	2	2	0	0		?	WBGene00008029;WBGene00006619	C39E9.5;ZK546.15	NA;NA
TSPOP260	2	2	0	0		?	WBGene00003562;WBGene00009793	F09G8.4;F46F6.2a	NA;NA
TSPOP261	2	2	1	1	2	1,NA	WBGene00003064;WBGene00022269	R10H10.1;Y73E7A.2	CEOP4376;NA
TSPOP262	2	2	0	0		?	WBGene00006836;WBGene00007179	C47E8.7;B0457.4	NA;NA
TSPOP263	3	3	1	1	2	1,NA,NA	WBGene00018088;WBGene00019414;WBGene00008785	F36D4.2;K05F6.3;F14B6.4	CEOP5228;NA;NA
TSPOP264	2	2	1	1	2	1,NA	WBGene00015513;WBGene00017814	C06A8.2;F26A10.2	CEOP2731;NA
TSPOP265	2	2	0	0		?	WBGene00000911;WBGene00044732	C10C5.6b;T03G11.10	NA;NA
TSPOP266	2	2	1	1	4	1,NA	WBGene00013218;WBGene00012830	Y54G11A.9;Y43F8C.8	CEOP2636;NA
TSPOP267	2	2	0	0		?	WBGene00004854;WBGene00007260	F40E10.4;C02C6.2a	NA;NA
TSPOP268	2	1	1	1	2	?	WBGene00021348	Y37E3.4	CEOP1028
TSPOP269	2	2	0	0		?	WBGene00002031;WBGene00016406	Y34B4A.3;C34D10.1	NA;NA
TSPOP27	2	1	0	0		?	WBGene00021920	Y55F3AM.1	NA
TSPOP270	2	2	1	1	2	1,NA	WBGene00011239;WBGene00009920	R11A8.5;F52B5.1a	CEOP4372;NA
TSPOP271	2	2	0	0		?	WBGene00016678;WBGene00012337	C45G9.7;W07G4.3	NA;NA
TSPOP272	2	2	1	1	2	1,NA	WBGene00015579;WBGene00017085	C07H6.2;E01A2.2a	CEOP3849;NA
TSPOP273	2	2	1	1	4	1,NA	WBGene00018610;WBGene00017313	F48E8.3;F09G2.4	CEOP3304;NA
TSPOP274	2	2	1	1	2	1,NA	WBGene00016496;WBGene00011175	C37C3.2;R09E10.5	CEOP5611;NA
TSPOP275	2	2	2	2	2,2	?	WBGene00013332;WBGene00010037	Y57G11C.43;F54C8.4a	CEOP4667;CEOP3580
TSPOP276	2	2	2	2	3,3	?	WBGene00007760;WBGene00011067	C27B7.2;R06F6.2	CEOP4312;CEOP2504
TSPOP277	2	2	2	2	4,3	?	WBGene00000787;WBGene00017062	C41D11.8;D2063.3a	CEOP1180;CEOP5052
TSPOP278	2	1	0	0		?	WBGene00011834	T19B10.6	NA
TSPOP279	2	2	1	1	2	1,NA	WBGene00010231;WBGene00003394	F58B3.4;T07H6.2	CEOP4460;NA
TSPOP28	2	2	2	1	2	identical	WBGene00000222;WBGene00009726	F45E6.2;F45E6.3	CEOPX108;CEOPX108
TSPOP280	2	2	1	1	3	1,NA	WBGene00004205;WBGene00004446	F29B9.4b;T24B8.1a	CEOP4128;NA
TSPOP281	2	2	1	1	2	1,NA	WBGene00017360;WBGene00001650	F10E9.11;F25H8.3b	CEOP3504;NA
TSPOP282	3	3	3	2	2,3	?	WBGene00006369;WBGene00011334;WBGene00010993	R03E1.1;T01E8.6;R03E1.2	CEOPX128;CEOP2472;CEOPX128
TSPOP283	2	2	1	1	4	1,NA	WBGene00006446;WBGene00009200	F28F8.6;F28C1.1	CEOP5444;NA
TSPOP284	2	1	0	0		?	WBGene00044773	C08A9.10	NA
TSPOP285	2	2	1	1	4	1,NA	WBGene00021377;WBGene00019825	Y37E11B.5;R02D3.8	CEOP4100;NA
TSPOP286	2	1	1	1	2	?	WBGene00006626	F10G7.2	CEOP2132
TSPOP287	2	2	1	1	2	1,NA	WBGene00019333;WBGene00016331	K02F3.10;C32F10.1b	CEOP3040;NA
TSPOP289	3	3	2	1	5	2,1,NA	WBGene00019006;WBGene00019005;WBGene00007953	F57B10.9;F57B10.8;C35A5.9	CEOP1332;CEOP1332;NA
TSPOP29	2	2	1	1	3	1,NA	WBGene00001497;WBGene00019928	T08B2.9b;R07C3.12	CEOP1312;NA
TSPOP290	2	2	0	0		?	WBGene00002299;WBGene00013151	ZK1067.1d;Y53F4B.4b	NA;NA
TSPOP291	2	2	2	2	2,4	?	WBGene00017919;WBGene00017283	F29B9.1;F09E5.3	CEOP4136;CEOP2168
TSPOP292	2	2	2	1	3	identical	WBGene00016621;WBGene00016622	C43H8.1;C43H8.2	CEOP1628;CEOP1628
TSPOP293	2	1	1	1	2	?	WBGene00013344	Y59A8B.7	CEOP5464
TSPOP294	2	2	0	0		?	WBGene00006390;WBGene00008136	ZK1320.12a;C47D12.2	NA;NA
TSPOP295	2	2	0	0		?	WBGene00001534;WBGene00006876	F52E1.4a;ZK1151.1b	NA;NA
TSPOP296	2	2	1	1	2	1,NA	WBGene00002134;WBGene00022171	ZK770.3;Y71H2AM.6a	CEOP1108;NA
TSPOP297	3	3	1	1	5	1,NA,NA	WBGene00015191;WBGene00022277;WBGene00009443	B0432.10;Y74C9A.3;F35G12.7	CEOP2020;NA;NA
TSPOP298	3	3	2	1	2	2,1,NA	WBGene00007194;WBGene00007189;WBGene00004790	B0491.7;B0491.1;F07H5.2	CEOP2532;CEOP2532;NA
TSPOP299	2	2	2	1	3	identical	WBGene00006919;WBGene00018512	F46F11.5;F46F11.9a	CEOP1264;CEOP1264
TSPOP3	2	2	1	1	2	1,NA	WBGene00007528;WBGene00014215	C11H1.2;ZK1086.1b	CEOPX134;NA
TSPOP30	2	2	1	1	2	1,NA	WBGene00006590;WBGene00018700	ZC395.3b;F52E1.13f	CEOP3280;NA
TSPOP300	2	2	0	0		?	WBGene00017066;WBGene00001209	D2092.5;C27D11.1	NA;NA
TSPOP301	2	2	2	1	3	reversed	WBGene00009286;WBGene00009285	F31C3.4;F31C3.3	CEOP1776;CEOP1776
TSPOP302	2	2	0	0		?	WBGene00016002;WBGene00000938	C18H9.3c;C26C6.5a	NA;NA
TSPOP303	2	2	0	0		?	WBGene00015125;WBGene00017098	B0303.3;E02D9.1c	NA;NA
TSPOP304	2	2	1	1	3	1,NA	WBGene00000426;WBGene00004888	Y106G6E.5b;K12C11.2	CEOP1592;NA
TSPOP305	2	2	1	1	2	1,NA	WBGene00007009;WBGene00021931	Y65B4BR.4d;Y55F3AM.14	CEOP1934;NA
TSPOP306	2	2	2	1	4	reversed	WBGene00011058;WBGene00006958	R06C1.2;R06C1.3a	CEOP1660;CEOP1660
TSPOP307	2	2	1	1	2	1,NA	WBGene00001056;WBGene00016494	K02F2.1b;C37A2.8a	CEOP1999;NA
TSPOP308	2	2	2	1	3	reversed	WBGene00008134;WBGene00008133	C47B2.9;C47B2.7b	CEOP1786;CEOP1786
TSPOP309	2	2	2	2	2,3	?	WBGene00013237;WBGene00009277	Y56A3A.19;F30F8.10b	CEOP3738;CEOP1424
TSPOP31	3	3	1	1	1	1,NA,NA	WBGene00016592;WBGene00003084;WBGene00009811	C42C1.15;R160.7;F47B8.10	CEOP4508;NA;NA
TSPOP310	3	3	2	2	2,2	?	WBGene00020286;WBGene00020441;WBGene00004478	T06A10.3a;T12A2.7;F40F8.10	CEOP4668;CEOP3360;NA
TSPOP311	2	2	1	1	2	1,NA	WBGene00003148;WBGene00022733	H21P03.1;ZK418.3	CEOP4444;NA
TSPOP312	2	2	1	1	2	1,NA	WBGene00021854;WBGene00012398	Y54F10AR.1;Y6E2A.4	CEOP3861;NA
TSPOP313	2	1	1	1	2	?	WBGene00011867	T20G5.1	CEOP3858
TSPOP314	2	2	1	1	2	1,NA	WBGene00004680;WBGene00018213	C29H12.1;F39H12.2	CEOP2236;NA
TSPOP315	2	2	2	2	2,5	?	WBGene00021714;WBGene00001740	Y49F6B.1;ZC395.6	CEOP2108;CEOP3272
TSPOP316	2	2	1	1	2	1,NA	WBGene00015466;WBGene00008225	C05C8.9a;C50B8.3	CEOP5152;NA
TSPOP317	2	2	2	1	2	reversed	WBGene00019077;WBGene00019076	F59A3.4;F59A3.3	CEOP1256;CEOP1256
TSPOP318	2	2	0	0		?	WBGene00009920;WBGene00009099	F52B5.1b;F25B3.2	NA;NA
TSPOP319	2	2	1	1	2	1,NA	WBGene00009050;WBGene00004368	F22D6.2;C32E8.7	CEOP1364;NA
TSPOP32	2	2	1	1	2	1,NA	WBGene00022044;WBGene00006578	Y66H1A.2a;F25H2.1	CEOP4028;NA
TSPOP320	3	3	1	1	2	1,NA,NA	WBGene00003794;WBGene00010941;WBGene00000417	Y41D4B.19b;M176.2;C48D1.2b	CEOP4615;NA;NA
TSPOP321	2	2	2	1	3	reversed	WBGene00013670;WBGene00000158	Y105E8A.10c;Y105E8A.9	CEOP1904;CEOP1904
TSPOP322	2	1	1	1	3	?	WBGene00007621	C16C2.4a	CEOP1560
TSPOP323	2	2	1	1	2	1,NA	WBGene00009452;WBGene00003953	F36A2.2;F39H11.5	CEOP1504;NA
TSPOP324	2	1	0	0		?	WBGene00007705	C25A1.1	NA
TSPOP325	2	2	1	1	2	1,NA	WBGene00022045;WBGene00016331	Y66H1A.3;C32F10.1a	CEOP4028;NA
TSPOP326	2	2	1	1	3	1,NA	WBGene00011065;WBGene00010416	R06C7.6;H25P06.1	CEOP1380;NA
TSPOP327	2	1	1	1	4	?	WBGene00018149	F37C12.1	CEOP3416
TSPOP328	2	2	1	1	2	1,NA	WBGene00009563;WBGene00010730	F39H2.3;K10C3.2	CEOP1496;NA
TSPOP329	2	2	1	1	4	1,NA	WBGene00010437;WBGene00022199	JC8.5a;Y71H10A.1a	CEOP4536;NA
TSPOP33	2	2	2	2	2,2	?	WBGene00018161;WBGene00001372	F38A5.2b;R09B3.1a	CEOP4184;CEOP1656
TSPOP330	2	2	0	0		?	WBGene00001037;WBGene00019673	T05C3.5;K12C11.1a	NA;NA
TSPOP331	2	2	1	1	2	1,NA	WBGene00004895;WBGene00021536	CC4.3;Y42H9AR.1	CEOP1682;NA
TSPOP332	2	2	1	1	1	1,NA	WBGene00020955;WBGene00044763	W02G9.5c;ZK688.12	CEOP5531;NA
TSPOP333	2	2	1	1	2	1,NA	WBGene00011272;WBGene00012735	R53.2;Y40B1A.4	CEOP2746;NA
TSPOP334	2	2	1	1	2	1,NA	WBGene00017924;WBGene00009307	F29B9.10;F32A11.1	CEOP4132;NA
TSPOP335	2	2	0	0		?	WBGene00004809;WBGene00004807	F44G3.6;F46A9.5	NA;NA
TSPOP336	2	2	2	2	3,2	?	WBGene00010731;WBGene00013041	K10C3.4a;Y49E10.22	CEOP1566;CEOP3893
TSPOP337	2	2	0	0		?	WBGene00006062;WBGene00000792	F30A10.8;F11C7.4	NA;NA
TSPOP338	2	2	0	0		?	WBGene00021095;WBGene00008053	W08F4.6;C41C4.8	NA;NA
TSPOP339	2	2	0	0		?	WBGene00012353;WBGene00006807	W09C5.7a;C17D12.2b	NA;NA
TSPOP34	2	2	2	1	2	identical	WBGene00003061;WBGene00022835	ZK973.10;ZK973.9	CEOP1176;CEOP1176
TSPOP340	2	2	1	1	3	1,NA	WBGene00012964;WBGene00000776	Y48A6B.3;T03E6.7a	CEOP3712;NA
TSPOP341	2	2	2	1	3	identical	WBGene00000812;WBGene00021683	Y48G1C.2a;Y48G1C.10a	CEOP1940;CEOP1940
TSPOP342	2	2	2	2	7,1	?	WBGene00000796;WBGene00008427	C14A4.4a;D2085.2	CEOP2496;CEOP2376
TSPOP343	2	1	0	0		?	WBGene00009626;WBGene00009626	F42A8.1;F42A8.1	NA;NA
TSPOP344	2	2	1	1	2	1,NA	WBGene00000549;WBGene00001771	R107.6b;T28A11.11	CEOP3572;NA
TSPOP345	3	3	2	2	5,3	?	WBGene00016142;WBGene00009187;WBGene00013043	C26E6.6;F27D4.1;Y49E10.24a	CEOP3244;CEOP1989;NA
TSPOP346	2	2	1	1	2	1,NA	WBGene00017088;WBGene00013852	E01A2.6;ZC101.3	CEOP1892;NA
TSPOP347	2	2	2	1	7	reversed	WBGene00007564;WBGene00007556	C14A4.14;C14A4.3	CEOP2496;CEOP2496
TSPOP348	2	1	0	0		?	WBGene00003928	ZK945.2	NA
TSPOP349	2	2	2	2	4,3	?	WBGene00001486;WBGene00009002	F59G1.7;F21C3.3	CEOP2232;CEOP1384
TSPOP35	2	2	2	2	4,2	?	WBGene00019535;WBGene00013920	K08D10.12a;ZC506.3	CEOP4116;CEOPX107
TSPOP350	2	2	2	1	2	reversed	WBGene00016889;WBGene00005025	C52E12.4;C52E12.3	CEOP2276;CEOP2276
TSPOP351	2	1	1	1	2	?	WBGene00008078	C44B9.1	CEOP3813
TSPOP353	2	2	1	1	2	1,NA	WBGene00010736;WBGene00023462	K10C8.3c;C09G12.10	CEOP5364;NA
TSPOP354	2	2	1	1	2	1,NA	WBGene00022453;WBGene00013902	Y110A2AR.3a;ZC455.1a	CEOP2076;NA
TSPOP355	2	2	0	0		?	WBGene00007302;WBGene00009217	C04F12.8;F28D1.8	NA;NA
TSPOP356	2	2	1	1	2	1,NA	WBGene00006833;WBGene00019491	F53F10.4a;K07E3.2	CEOP1116;NA
TSPOP357	2	1	1	1	5	?	WBGene00008458	E02H1.6	CEOP2436
TSPOP358	2	1	1	1	2	?	WBGene00007050	F18C5.3	CEOP2250
TSPOP36	2	2	2	2	2,3	?	WBGene00001566;WBGene00021904	C28C12.9;Y55B1AL.2	CEOP4292;CEOP3828
TSPOP360	2	1	0	0		?	WBGene00009552	F39B1.1	NA
TSPOP361	2	2	2	2	2,4	?	WBGene00012714;WBGene00006946	Y39E4B.1;C34E10.4b	CEOP3819;CEOP3268
TSPOP362	2	2	0	0		?	WBGene00016674;WBGene00011441	C45G9.2;T04F8.2	NA;NA
TSPOP363	2	2	0	0		?	WBGene00000817;WBGene00000959	B0547.1;F46H6.2a	NA;NA
TSPOP364	2	1	0	0		?	WBGene00019627	K10D2.1a	NA
TSPOP365	1	1	1	1	2	?	WBGene00017286	F09E5.8	CEOP2164
TSPOP366	2	2	1	1	2	1,NA	WBGene00000184;WBGene00004298	Y116A8C.12;W06D4.6	CEOP4669;NA
TSPOP367	2	2	1	1	2	1,NA	WBGene00006708;WBGene00021883	Y54G2A.31;Y54G2A.18	CEOP4072;NA
TSPOP368	2	2	2	2	4,4	?	WBGene00016412;WBGene00016390	C34E10.11;C34B2.5	CEOP3268;CEOP1636
TSPOP369	2	2	0	0		?	WBGene00018193;WBGene00000898	F39C12.1;Y55D5A.5e	NA;NA
TSPOP37	2	2	1	1	2	1,NA	WBGene00011776;WBGene00018777	T14G10.7;F53H1.3a	CEOP4356;NA
TSPOP370	2	2	0	0		?	WBGene00005662;WBGene00002804	W03B1.4a;Y110A7A.19	NA;NA
TSPOP371	2	2	2	1	2	identical	WBGene00001235;WBGene00012756	Y41C4A.10;Y41C4A.9	CEOP3728;CEOP3728
TSPOP372	2	2	1	1	5	1,NA	WBGene00021758;WBGene00009978	Y50D7A.10;F53E4.1b	CEOP3851;NA
TSPOP373	3	2	2	2	3,3	?	WBGene00021208;WBGene00006997	Y18H1A.2a;ZK546.1d	CEOP1014;CEOP2690
TSPOP374	2	2	0	0		?	WBGene00002228;WBGene00012739	C06G3.2;Y40B1B.7	NA;NA
TSPOP376	1	1	1	1	2	?	WBGene00017286	F09E5.8	CEOP2164
TSPOP377	2	1	1	1	2	?	WBGene00017088	E01A2.6	CEOP1892
TSPOP378	1	1	0	0		?	WBGene00045500	T05E12.9	NA
TSPOP379	2	2	1	1	4	1,NA	WBGene00006946;WBGene00017922	C34E10.4b;F29B9.7	CEOP3268;NA
TSPOP38	2	2	2	2	5,2	?	WBGene00016375;WBGene00014938	C33H5.8;Y62E10A.11	CEOP4252;CEOP4548
TSPOP380	2	1	1	1	5	?	WBGene00001823	ZC395.7	CEOP3272
TSPOP381	2	1	0	0		?	WBGene00011280	R74.6	NA
TSPOP382	2	1	1	1	4	?	WBGene00017889	F28B3.10	CEOP1208
TSPOP383	2	2	2	2	2,4	?	WBGene00012714;WBGene00006946	Y39E4B.1;C34E10.4b	CEOP3819;CEOP3268
TSPOP384	2	2	2	1	3	identical	WBGene00008006;WBGene00008008	C38D4.5b;C38D4.9	CEOP3220;CEOP3220
TSPOP385	1	1	0	0		?	WBGene00003412	F20B6.3	NA
TSPOP386	2	2	2	2	4,3	?	WBGene00000838;WBGene00022759	Y108G3AL.1b;ZK546.2b	CEOP5588;CEOP2690
TSPOP387	2	2	1	1	2	1,NA	WBGene00013997;WBGene00235263	ZK550.3;Y66H1A.8b	CEOP4600;NA
TSPOP388	2	2	2	2	6,3	?	WBGene00020110;WBGene00015353	R151.7b;C02F5.13	CEOP3424;CEOP3496
TSPOP39	2	2	1	1	3	1,NA	WBGene00015793;WBGene00001371	C15C7.7;F26H11.5	CEOPX040;NA
TSPOP4	3	3	2	2	3,2	?	WBGene00008364;WBGene00007752;WBGene00012927	D1046.3;C26H9A.2d;Y47D3A.14	CEOP4316;CEOP4654;NA
TSPOP40	5	5	4	4	2,4,3,2	?	WBGene00011941;WBGene00011860;WBGene00004424;WBGene00012730;WBGene00010033	T23B5.4a;T20D3.8;JC8.3a;Y39G8C.1;F54B11.10	CEOP4654;CEOP4328;CEOP4535;CEOP2724;NA
TSPOP41	2	2	1	1	4	1,NA	WBGene00007616;WBGene00007882	C15H11.8;C33A12.3a	CEOP5416;NA
TSPOP42	2	2	2	2	3,3	?	WBGene00019822;WBGene00021515	R02D3.4b;Y41D4B.12a	CEOP4008;CEOP4047
TSPOP43	2	2	2	2	6,3	?	WBGene00015238;WBGene00013376	B0511.13b;Y62E10A.6	CEOP1632;CEOP4540
TSPOP44	2	2	2	2	2,3	?	WBGene00016740;WBGene00017999	C48B6.2;F33D4.7	CEOP1356;CEOP4240
TSPOP45	2	1	1	1	5	?	WBGene00044325	C33H5.19	CEOP4252
TSPOP46	2	2	2	2	2,2	?	WBGene00020215;WBGene00013176	T04G9.4;Y53F4B.39a	CEOPX147;CEOP2660
TSPOP47	4	4	2	2	2,2	?	WBGene00018723;WBGene00000764;WBGene00001808;WBGene00004482	F53A3.7;T03F1.2;T10G3.6a;C16A3.9	CEOP3845;CEOP1124;NA;NA
TSPOP48	2	2	0	0		?	WBGene00013963;WBGene00022173	ZK287.2a;Y71H2AM.8	NA;NA
TSPOP49	2	2	1	1	2	1,NA	WBGene00007588;WBGene00020365	C14C10.5b;T08G2.2	CEOP5574;NA
TSPOP5	2	2	1	1	4	1,NA	WBGene00013462;WBGene00018740	Y67H2A.4d;F53B3.1	CEOP4538;NA
TSPOP50	2	2	1	1	3	1,NA	WBGene00011122;WBGene00018994	R07H5.2a;F56H1.3	CEOP4424;NA
TSPOP51	2	2	1	1	4	1,NA	WBGene00015091;WBGene00003062	B0261.1;K09H9.6	CEOP1228;NA
TSPOP53	2	2	0	0		?	WBGene00003008;WBGene00022172	Y54G2A.1;Y71H2AM.7	NA;NA
TSPOP54	3	3	2	2	5,6	?	WBGene00013678;WBGene00044310;WBGene00020471	Y105E8A.20b;H20J04.9;T13B5.3	CEOP1736;CEOP2124;NA
TSPOP55	2	2	0	0		?	WBGene00020437;WBGene00008927	T12A2.2;F17H10.3b	NA;NA
TSPOP56	2	2	2	2	3,4	?	WBGene00017142;WBGene00016392	EEED8.14;C34B2.7	CEOP2180;CEOP1636
TSPOP57	2	2	1	1	2	1,NA	WBGene00015159;WBGene00043705	B0361.5b;Y55F3AM.7a	CEOP3833;NA
TSPOP58	2	2	2	1	2	identical	WBGene00004759;WBGene00008452	F45D3.5;E02A10.1	CEOP5356;CEOP5356
TSPOP59	2	2	0	0		?	WBGene00021899;WBGene00018547	Y54H5A.1;F47C12.2	NA;NA
TSPOP6	2	2	2	1	3	identical	WBGene00008006;WBGene00008008	C38D4.5a;C38D4.9	CEOP3220;CEOP3220
TSPOP60	2	2	0	0		?	WBGene00017268;WBGene00013477	F08F8.2;Y69E1A.5	NA;NA
TSPOP61	2	2	1	1	2	1,NA	WBGene00001366;WBGene00004276	C33D9.1c;K09A9.2	CEOP4610;NA
TSPOP62	2	1	0	0		?	WBGene00006368	C54H2.1a	NA
TSPOP63	2	2	1	1	8	1,NA	WBGene00012996;WBGene00006512	Y48C3A.16;F18E2.2	CEOP2606;NA
TSPOP64	2	1	0	0		?	WBGene00007007	C44C8.6	NA
TSPOP65	2	2	1	1	2	1,NA	WBGene00021313;WBGene00012530	Y32H12A.5;Y32F6A.5b	CEOP3802;NA
TSPOP66	2	2	0	0		?	WBGene00009882;WBGene00003423	F49C12.13;R10E9.1	NA;NA
TSPOP67	4	4	1	1	2	1,NA,NA,NA	WBGene00001590;WBGene00019898;WBGene00008586;WBGene00006853	C45G3.3;R05G6.4;F08G12.2;C47G2.2	CEOP1986;NA;NA;NA
TSPOP68	2	1	1	1	2	?	WBGene00004031	T13F2.3b	CEOP4624
TSPOP69	2	1	1	1	2	?	WBGene00013144	Y53C12B.2	CEOP2452
TSPOP7	2	2	0	0		?	WBGene00012978;WBGene00019600	Y48B6A.1;K09H11.3	NA;NA
TSPOP70	2	2	0	0		?	WBGene00007022;WBGene00012626	ZK970.3;Y38H6C.14	NA;NA
TSPOP71	2	2	2	2	2,2	?	WBGene00016194;WBGene00044077	C28H8.3;T18H9.7a	CEOP3350;CEOP5220
TSPOP72	2	2	1	1	2	1,NA	WBGene00018878;WBGene00012530	F55D10.3;Y32F6A.5b	CEOPX048;NA
TSPOP73	2	1	0	0		?	WBGene00002066	M110.4a	NA
TSPOP74	2	1	0	0		?	WBGene00006452	R148.6	NA
TSPOP75	2	2	2	2	3,4	?	WBGene00013406;WBGene00011634	Y63D3A.7;T09A5.5	CEOP1731;CEOP2312
TSPOP76	3	3	1	1	3	1,NA,NA	WBGene00010408;WBGene00004979;WBGene00002162	H19N07.4a;F42G8.11;F42G8.12	CEOP5272;NA;NA
TSPOP77	3	3	0	0		?	WBGene00011887;WBGene00007643;WBGene00010812	T21B10.5a;C17E4.3;M01F1.6	NA;NA;NA
TSPOP78	2	2	1	1	3	1,NA	WBGene00013587;WBGene00004188	Y80D3A.9;W07E6.4	CEOP5476;NA
TSPOP79	2	2	2	2	2,2	?	WBGene00000962;WBGene00000181	T21E12.4b;F01G4.2a	CEOP1994;CEOP4412
TSPOP8	2	2	1	1	2	1,NA	WBGene00003389;WBGene00020562	K03H1.2;T19C3.4	CEOP3642;NA
TSPOP80	2	1	0	0		?	WBGene00012814	Y43F8B.3b	NA
TSPOP81	2	1	0	0		?	WBGene00018468	F45E4.3e	NA
TSPOP82	2	2	1	1	3	1,NA	WBGene00010044;WBGene00019207	F54C9.9;H17B01.1a	CEOP2368;NA
TSPOP83	2	1	1	1	2	?	WBGene00002497	F52H3.1	CEOP2696
TSPOP84	2	2	1	1	8	1,NA	WBGene00138717;WBGene00003009	F52C12.6a;K10B2.1d	CEOP4052;NA
TSPOP85	2	2	1	1	2	1,NA	WBGene00004136;WBGene00012666	K11D12.2;Y39B6A.3a	CEOP5564;NA
TSPOP86	2	2	1	1	2	1,NA	WBGene00012037;WBGene00004403	T26E3.4;Y116A8C.16f	CEOP1672;NA
TSPOP87	3	2	1	1	3	1,NA	WBGene00018934;WBGene00018932	F56B3.11a;F56B3.8a	CEOP4036;NA
TSPOP88	2	2	0	0		?	WBGene00011821;WBGene00020556	T18D3.3a;T19B4.1	NA;NA
TSPOP89	2	2	1	1	3	1,NA	WBGene00008684;WBGene00003733	F11A10.3a;F57C7.2b	CEOP4490;NA
TSPOP9	2	2	1	1	2	1,NA	WBGene00007668;WBGene00012717	C18B12.6;Y39E4B.6b	CEOPX132;NA
TSPOP90	2	2	0	0		?	WBGene00022475;WBGene00003736	Y119C1B.10b;ZK822.3b	NA;NA
TSPOP91	2	2	2	2	6,5	?	WBGene00012694;WBGene00021752	Y39B6A.36;Y50D7A.2	CEOP5480;CEOP3851
TSPOP92	2	2	1	1	2	1,NA	WBGene00010042;WBGene00015508	F54C9.6;C06A6.3	CEOP2364;NA
TSPOP93	2	2	1	1	2	1,NA	WBGene00021956;WBGene00016442	Y57E12AL.1a;C35D10.5	CEOP5534;NA
TSPOP94	2	2	2	1	4	reversed	WBGene00013464;WBGene00000818	Y67H2A.7a;Y67H2A.6b	CEOP4538;CEOP4538
TSPOP95	2	1	1	1	3	?	WBGene00044025	T01G1.4	CEOP4639
TSPOP96	2	2	0	0		?	WBGene00044631;WBGene00012916	F55A11.5;Y46G5A.28	NA;NA
TSPOP97	2	2	2	1	2	reversed	WBGene00021423;WBGene00021421	Y38F2AR.5b;Y38F2AR.3a	CEOP4060;CEOP4060
TSPOP98	2	2	0	0		?	WBGene00010356;WBGene00001555	H03A11.1;T04D3.4a	NA;NA
TSPOP99	2	2	2	2	2,2	?	WBGene00006497;WBGene00021934	F10G7.1;Y55F3AR.3a	CEOP2132;CEOP4046

## Sheet: BT8c
T. spiralis operon	Genes	Homologous C. elegans genes	Homologous C. elegans operonic genes	C. elegans operons	C. elegans operon sizes	Synteny	C. elegans gene IDs	C. elegans gene names	C. elegans operon IDs
TSPOP1	2	1	1	1	8	?	WBGene00021655	Y48A5A.1	CEOP4052
TSPOP10	2	2	2	2	4,2	?	WBGene00008664;WBGene00006701	F10G8.6;C35B1.1	CEOP1584;CEOP4112
TSPOP100	2	2	1	1	8	1,NA	WBGene00138717;WBGene00003009	F52C12.6a;K10B2.1d	CEOP4052;NA
TSPOP101	2	2	0	0		?	WBGene00012665;WBGene00013481	Y39B6A.2a;Y69H2.3e	NA;NA
TSPOP102	2	2	1	1	2	1,NA	WBGene00004136;WBGene00012666	K11D12.2;Y39B6A.3a	CEOP5564;NA
TSPOP103	2	2	2	2	2,2	?	WBGene00022379;WBGene00001547	Y94H6A.7;T03D8.5c	CEOP4068;CEOP5581
TSPOP104	2	2	1	1	2	1,NA	WBGene00012037;WBGene00004403	T26E3.4;Y116A8C.16f	CEOP1672;NA
TSPOP105	3	3	1	1	3	1,NA,NA	WBGene00018934;WBGene00020050;WBGene00018932	F56B3.11a;R13A5.7;F56B3.8a	CEOP4036;NA;NA
TSPOP107	2	2	0	0		?	WBGene00020556;WBGene00011821	T19B4.1;T18D3.3a	NA;NA
TSPOP108	2	2	1	1	3	1,NA	WBGene00008684;WBGene00007697	F11A10.3a;C24F3.2	CEOP4490;NA
TSPOP109	2	2	0	0		?	WBGene00022475;WBGene00003736	Y119C1B.10b;ZK822.3b	NA;NA
TSPOP11	2	2	0	0		?	WBGene00017046;WBGene00002393	D2021.1a;Y65B4BR.2a	NA;NA
TSPOP110	2	2	2	2	5,6	?	WBGene00021752;WBGene00012694	Y50D7A.2;Y39B6A.36	CEOP3851;CEOP5480
TSPOP111	2	2	1	1	2	1,NA	WBGene00010042;WBGene00015508	F54C9.6;C06A6.3	CEOP2364;NA
TSPOP112	2	2	2	1	2	reversed	WBGene00021960;WBGene00021956	Y57E12AM.1;Y57E12AL.1a	CEOP5534;CEOP5534
TSPOP113	2	2	2	1	4	identical	WBGene00000818;WBGene00013464	Y67H2A.6b;Y67H2A.7a	CEOP4538;CEOP4538
TSPOP114	2	1	1	1	3	?	WBGene00044025	T01G1.4	CEOP4639
TSPOP115	2	2	0	0		?	WBGene00044631;WBGene00012916	F55A11.5;Y46G5A.28	NA;NA
TSPOP116	2	2	2	1	2	identical	WBGene00021421;WBGene00021423	Y38F2AR.3a;Y38F2AR.5b	CEOP4060;CEOP4060
TSPOP117	2	2	0	0		?	WBGene00010356;WBGene00001555	H03A11.1;T04D3.4a	NA;NA
TSPOP118	2	2	2	2	2,2	?	WBGene00006497;WBGene00021934	F10G7.1;Y55F3AR.3a	CEOP2132;CEOP4046
TSPOP119	2	2	2	2	2,4	?	WBGene00001635;WBGene00001860	Y45F10D.3b;F28B3.7a	CEOP4560;CEOP1208
TSPOP12	3	3	3	2	2,3	?	WBGene00022794;WBGene00022793;WBGene00012966	ZK686.4;ZK686.3;Y48A6B.5	CEOP3452;CEOP3452;CEOP3712
TSPOP120	2	2	1	1	4	1,NA	WBGene00012643;WBGene00017605	Y39A1A.3;F19F10.9	CEOP3684;NA
TSPOP121	2	1	1	1	3	?	WBGene00006607	F57B10.7	CEOP1336
TSPOP122	2	2	2	2	6,6	?	WBGene00019163;WBGene00006489	H06H21.6;ZK856.9	CEOP4152;CEOP5248
TSPOP123	2	2	2	1	3	identical	WBGene00004432;WBGene00017121	E04A4.8;E04A4.7	CEOP4148;CEOP4148
TSPOP124	2	1	1	1	2	?	WBGene00010304	F59A2.4a	CEOP3108
TSPOP125	2	2	1	1	2	1,NA	WBGene00002891;WBGene00008259	C56G2.6a;C52E4.7	CEOP3870;NA
TSPOP126	2	2	1	1	2	1,NA	WBGene00001983;WBGene00009131	E04A4.4b;F25H8.1b	CEOP4144;NA
TSPOP127	2	1	0	0		?	WBGene00044637	Y47D7A.16a	NA
TSPOP128	2	2	0	0		?	WBGene00016935;WBGene00003153	C54G7.4;Y67D8C.10e	NA;NA
TSPOP129	2	2	2	2	3,3	?	WBGene00007020;WBGene00007387	Y104H12D.1a;C06H2.3a	CEOP4049;CEOP5276
TSPOP13	2	2	2	1	6	reversed	WBGene00020422;WBGene00006736	T10F2.2;T10F2.3	CEOP3260;CEOP3260
TSPOP130	2	2	0	0		?	WBGene00014095;WBGene00010134	ZK829.4;F55H12.3	NA;NA
TSPOP131	3	2	1	1	3	1,NA	WBGene00006957;WBGene00016844	C07G1.4a;C50F7.4	CEOP4274;NA
TSPOP132	2	1	1	1	3	?	WBGene00000147	VF36H2L.1	CEOP1542
TSPOP133	2	2	1	1	3	1,NA	WBGene00000996;WBGene00021870	F49E8.5;Y54G2A.4	CEOP4228;NA
TSPOP134	2	2	0	0		?	WBGene00012887;WBGene00004371	Y45F10D.7;Y42H9B.2	NA;NA
TSPOP135	2	2	0	0		?	WBGene00008281;WBGene00013455	C53D6.4b;Y67A10A.6c	NA;NA
TSPOP136	2	2	2	2	2,2	?	WBGene00009006;WBGene00010557	F21D5.1;K04D7.2b	CEOP4300;CEOP4360
TSPOP137	3	3	0	0		?	WBGene00014666;WBGene00008729;WBGene00003963	C05D12.3a;F13B12.1;C07A12.4a	NA;NA;NA
TSPOP138	2	2	1	1	2	1,NA	WBGene00017797;WBGene00000390	F25G6.2;R07G3.1	CEOP5204;NA
TSPOP139	2	2	0	0		?	WBGene00004738;WBGene00007652	F18E2.3;C17G1.5	NA;NA
TSPOP14	2	2	2	2	2,3	?	WBGene00011144;WBGene00021133	R08D7.4b;W10D9.5a	CEOP3560;CEOP2686
TSPOP140	2	2	2	2	4,2	?	WBGene00022456;WBGene00017928	Y110A7A.6b;F29C4.6	CEOP1220;CEOP4004
TSPOP141	2	2	1	1	2	1,NA	WBGene00013301;WBGene00022232	Y57G11C.3b;Y73B6BL.3	CEOP4667;NA
TSPOP142	2	1	0	0		?	WBGene00001169;WBGene00001169	R03G5.1a;R03G5.1d	NA;NA
TSPOP143	3	3	2	2	5,3	?	WBGene00010809;WBGene00013378;WBGene00019899	M01F1.3;Y62E10A.10;R05G6.5	CEOP3124;CEOP4544;NA
TSPOP144	2	2	0	0		?	WBGene00020517;WBGene00010722	T15B7.2;K09E4.4	NA;NA
TSPOP145	2	2	2	2	4,3	?	WBGene00000761;WBGene00007111	C24A11.9;B0035.12	CEOP1248;CEOP4440
TSPOP146	2	2	0	0		?	WBGene00007880;WBGene00003657	C33A12.1;C08F8.8	NA;NA
TSPOP147	2	2	2	2	2,2	?	WBGene00009829;WBGene00003407	F47G9.1;F57C12.5c	CEOP5522;CEOPX154
TSPOP148	2	1	0	0		?	WBGene00022861	ZK1193.5d	NA
TSPOP149	2	2	0	0		?	WBGene00021012;WBGene00002140	W03G1.6d;C18H7.2b	NA;NA
TSPOP15	3	3	3	3	2,3,3	?	WBGene00011144;WBGene00021133;WBGene00022400	R08D7.4b;W10D9.5a;Y97E10AR.5	CEOP3560;CEOP2686;CEOP5172
TSPOP150	2	1	1	1	4	?	WBGene00006724	C08B11.7	CEOP2328
TSPOP151	2	2	2	2	3,3	?	WBGene00022121;WBGene00007645	Y71F9AM.4a;C17E4.6	CEOP1076;CEOP1544
TSPOP152	3	2	1	1	3	1,NA	WBGene00017646;WBGene00006772	F20H11.1;C50C3.9c	CEOP3392;NA
TSPOP153	2	1	1	1	3	?	WBGene00003594	Y56A3A.13	CEOP3744
TSPOP154	2	2	2	2	2,3	?	WBGene00022380;WBGene00022381	Y94H6A.8;Y94H6A.9a	CEOP4068;CEOP4665
TSPOP155	2	2	1	1	2	1,NA	WBGene00020030;WBGene00016534	R12E2.1;C39D10.7	CEOP1148;NA
TSPOP156	2	2	1	1	2	1,NA	WBGene00011451;WBGene00017534	T04H1.5;F17A9.2	CEOP5336;NA
TSPOP157	2	2	0	0		?	WBGene00017037;WBGene00017765	D1069.3b;F25B4.1	NA;NA
TSPOP158	2	2	1	1	3	1,NA	WBGene00044329;WBGene00018281	F11A10.8;F41D9.1	CEOP4490;NA
TSPOP159	2	2	1	1	2	1,NA	WBGene00006918;WBGene00000295	ZK970.4;W01C8.6b	CEOP2476;NA
TSPOP16	2	2	2	2	2,1	?	WBGene00013317;WBGene00302986	Y57G11C.22a;Y37E11AM.4	CEOP4661;CEOP5604
TSPOP160	2	2	1	1	2	1,NA	WBGene00004494;WBGene00022416	K02B2.5;Y102A11A.6	CEOP4611;NA
TSPOP161	3	2	1	1	6	1,NA	WBGene00020109;WBGene00011939	R151.6;T23B5.1a	CEOP3424;NA
TSPOP162	2	2	2	1	5	reversed	WBGene00023422;WBGene00009648	F43C1.6;F43C1.3	CEOP3164;CEOP3164
TSPOP163	2	2	2	2	2,3	?	WBGene00008769;WBGene00003162	F13G3.11;F20H11.3	CEOP1392;CEOP3392
TSPOP164	2	2	2	1	3	reversed	WBGene00014027;WBGene00006768	ZK637.9b;ZK637.8f	CEOP3556;CEOP3556
TSPOP165	2	2	1	1	3	1,NA	WBGene00006540;WBGene00017811	F58A4.8;F26A1.13	CEOP3608;NA
TSPOP166	2	1	0	0		?	WBGene00001281	F10B5.6	NA
TSPOP167	2	2	0	0		?	WBGene00008345;WBGene00219217	C56A3.6b;C08F8.15	NA;NA
TSPOP168	2	1	0	0		?	WBGene00009342;WBGene00009342	F32H2.5;F32H2.5	NA;NA
TSPOP169	2	1	1	1	2	?	WBGene00002002	K08E7.2	CEOP4520
TSPOP170	2	2	1	1	3	1,NA	WBGene00008684;WBGene00004228	F11A10.3a;R09H10.4	CEOP4490;NA
TSPOP171	3	2	1	1	7	1,NA	WBGene00009735;WBGene00022801	F45G2.9;ZK688.6a	CEOP3792;NA
TSPOP172	2	2	0	0		?	WBGene00003999;WBGene00006449	C05A9.1a;ZK757.3b	NA;NA
TSPOP174	2	2	0	0		?	WBGene00006620;WBGene00002217	C07G1.1;F56E3.3c	NA;NA
TSPOP175	2	1	1	1	2	?	WBGene00000247	T19E7.3a	CEOP4172
TSPOP176	2	2	1	1	2	1,NA	WBGene00017734;WBGene00020216	F23C8.5a;T04G9.5	CEOP1044;NA
TSPOP177	2	2	0	0		?	WBGene00008220;WBGene00012342	C50B6.7;W08D2.7	NA;NA
TSPOP178	2	1	1	1	3	?	WBGene00015207	B0495.8a	CEOP2308
TSPOP179	2	2	1	1	2	1,NA	WBGene00004430;WBGene00019492	Y45F10D.12;K07E3.4b	CEOP4560;NA
TSPOP18	2	1	0	0		?	WBGene00017166	F01F1.12b	NA
TSPOP180	2	2	1	1	3	1,NA	WBGene00015487;WBGene00003047	C05D11.10;T03F6.5	CEOP3372;NA
TSPOP181	2	2	2	2	5,2	?	WBGene00021754;WBGene00010040	Y50D7A.4;F54C8.7d	CEOP3851;CEOP3584
TSPOP182	2	1	0	0		?	WBGene00003377	C39E6.4	NA
TSPOP183	2	2	0	0		?	WBGene00012600;WBGene00001793	Y38E10A.22a;Y46G5A.31	NA;NA
TSPOP184	2	2	0	0		?	WBGene00018867;WBGene00022785	F55A12.10;ZK652.6a	NA;NA
TSPOP185	2	2	0	0		?	WBGene00020276;WBGene00003802	T05H4.15c;Y56A3A.17	NA;NA
TSPOP186	2	2	1	1	4	1,NA	WBGene00004095;WBGene00003975	F52C9.8f;T28D6.9	CEOP3284;NA
TSPOP187	2	2	1	1	2	1,NA	WBGene00009341;WBGene00012258	F32H2.4;W04G3.5a	CEOP1520;NA
TSPOP188	2	2	0	0		?	WBGene00022798;WBGene00008749	ZK688.3;F13E6.5	NA;NA
TSPOP189	2	2	0	0		?	WBGene00001018;WBGene00001579	C28H8.12;F56A11.1	NA;NA
TSPOP19	3	2	1	1	3	1,NA	WBGene00011773;WBGene00011775	T14G10.3;T14G10.5d	CEOP4619;NA
TSPOP190	2	1	1	1	2	?	WBGene00021021	W04B5.4	CEOP3076
TSPOP191	2	2	0	0		?	WBGene00019498;WBGene00010229	K07E8.7a;F58A4.6	NA;NA
TSPOP192	2	2	0	0		?	WBGene00007484;WBGene00016400	C09G1.2;C34D4.4	NA;NA
TSPOP193	2	2	2	2	2,2	?	WBGene00001258;WBGene00002185	Y80D3A.2e;T27E9.4a	CEOP5472;CEOP3800
TSPOP194	2	2	1	1	2	1,NA	WBGene00022078;WBGene00044720	Y69A2AR.7a;Y53F4B.42	CEOP4658;NA
TSPOP195	2	2	1	1	6	1,NA	WBGene00020636;WBGene00022664	T20H4.5;ZK121.2	CEOP3424;NA
TSPOP196	2	2	1	1	3	1,NA	WBGene00017981;WBGene00020687	F32D1.1a;T22D1.10	CEOP5052;NA
TSPOP197	2	2	0	0		?	WBGene00003020;WBGene00000516	C32F10.2;T05A6.1	NA;NA
TSPOP198	2	2	1	1	3	1,NA	WBGene00010230;WBGene00001596	F58A4.9;ZC308.1b	CEOP3608;NA
TSPOP199	2	1	1	1	3	?	WBGene00010479	K01G5.8a	CEOP3700
TSPOP2	2	2	1	1	4	1,NA	WBGene00012641;WBGene00018793	Y39A1A.1c;F54C4.1	CEOP3684;NA
TSPOP20	2	1	1	1	3	?	WBGene00015555	C06G3.9	CEOP4208
TSPOP200	3	3	1	1	3	1,NA,NA	WBGene00016990;WBGene00006786;WBGene00010283	CD4.4;Y60A3A.1;F58G11.6	CEOP5076;NA;NA
TSPOP201	2	2	0	0		?	WBGene00006786;WBGene00010283	Y60A3A.1;F58G11.6	NA;NA
TSPOP202	2	2	1	1	2	1,NA	WBGene00022599;WBGene00020088	ZC395.10;R119.2	CEOP3276;NA
TSPOP203	2	1	1	1	2	?	WBGene00000564	R01H10.8	CEOP3890
TSPOP204	2	2	1	1	3	1,NA	WBGene00012645;WBGene00019199	Y39A1A.6;H14E04.2b	CEOP3688;NA
TSPOP205	2	2	2	2	2,3	?	WBGene00009284;WBGene00002850	F31C3.2b;C16A3.3	CEOP1965;CEOP3368
TSPOP206	2	2	1	1	2	1,NA	WBGene00017547;WBGene00000101	F18A1.6b;D1022.7c	CEOP2668;NA
TSPOP207	2	2	1	1	4	1,NA	WBGene00004185;WBGene00000101	R166.4;D1022.7b	CEOP2492;NA
TSPOP208	2	2	0	0		?	WBGene00016311;WBGene00001329	C32D5.3;T04C10.2b	NA;NA
TSPOP209	2	2	1	1	3	1,NA	WBGene00001262;WBGene00022055	K10D2.6;Y67D2.5	CEOP3848;NA
TSPOP21	2	1	0	0		?	WBGene00009246	F29C12.4	NA
TSPOP210	2	2	2	2	3,2	?	WBGene00017982;WBGene00006840	F32D1.2;R05D3.7	CEOP5052;CEOP3512
TSPOP211	2	1	0	0		?	WBGene00002008	F43E2.8a	NA
TSPOP212	2	1	1	1	2	?	WBGene00015133	B0303.15	CEOP3538
TSPOP213	2	2	0	0		?	WBGene00020160;WBGene00020397	T02C5.3b;T10B11.1	NA;NA
TSPOP214	2	1	2	1	2	1,1	WBGene00012929;WBGene00012929	Y47D3A.16;Y47D3A.16	CEOP3825;CEOP3825
TSPOP215	2	2	0	0		?	WBGene00002179;WBGene00021074	T22C1.7;W07E6.2a	NA;NA
TSPOP216	2	2	1	1	2	1,NA	WBGene00013209;WBGene00019227	Y54G9A.6;H22K11.4a	CEOP2618;NA
TSPOP217	2	2	1	1	3	1,NA	WBGene00016754;WBGene00015168	C48E7.11;B0403.4	CEOP1316;NA
TSPOP218	2	2	1	1	2	1,NA	WBGene00006729;WBGene00006816	K07B1.3;F54B11.3a	CEOP5224;NA
TSPOP219	2	1	0	0		?	WBGene00021228	Y19D10A.13	NA
TSPOP22	2	2	1	1	4	1,NA	WBGene00004385;WBGene00001161	K08D10.4;Y102A5C.18	CEOP4116;NA
TSPOP220	2	1	1	1	3	?	WBGene00006768	ZK637.8e	CEOP3556
TSPOP221	2	2	1	1	4	1,NA	WBGene00012641;WBGene00016073	Y39A1A.1c;C24H12.4a	CEOP3684;NA
TSPOP222	2	2	2	1	3	identical	WBGene00011730;WBGene00023450	T12D8.2;T12D8.10	CEOP3818;CEOP3818
TSPOP223	2	2	2	2	2,3	?	WBGene00000767;WBGene00006725	C35D10.4;H06I04.4a	CEOP3226;CEOP3088
TSPOP224	2	2	1	1	2	1,NA	WBGene00022704;WBGene00009288	ZK353.9;F31C3.6a	CEOP3522;NA
TSPOP225	2	2	1	1	3	1,NA	WBGene00012204;WBGene00017716	W02B12.9;F22F4.1	CEOP2540;NA
TSPOP226	2	2	1	1	2	1,NA	WBGene00012768;WBGene00006634	Y41E3.10b;F33C8.3	CEOP4685;NA
TSPOP227	2	1	0	0		?	WBGene00013042;WBGene00013042	Y49E10.23a;Y49E10.23b	NA;NA
TSPOP228	2	2	1	1	2	1,NA	WBGene00001233;WBGene00011802	T16G1.11;T16G1.9	CEOP5376;NA
TSPOP229	2	1	0	0		?	WBGene00010488	K02A11.3	NA
TSPOP23	2	1	1	1	6	?	WBGene00009771	F46B6.6a	CEOP5236
TSPOP230	2	2	2	2	2,3	?	WBGene00021844;WBGene00010325	Y54E10BR.5;F59C6.4	CEOP1924;CEOP1616
TSPOP231	2	2	2	2	3,4	?	WBGene00022188;WBGene00010615	Y71H2AR.1;K07A1.9f	CEOP3086;CEOP1552
TSPOP232	2	2	0	0		?	WBGene00002202;WBGene00002203	C03C10.1;F46F2.2b	NA;NA
TSPOP233	2	2	2	1	2	reversed	WBGene00013803;WBGene00013802	Y116A8C.26b;Y116A8C.25a	CEOP4632;CEOP4632
TSPOP234	2	2	1	1	4	1,NA	WBGene00008667;WBGene00007969	F10G8.9b;C36A4.9b	CEOP1584;NA
TSPOP235	2	1	0	0		?	WBGene00010909	M88.7	NA
TSPOP236	2	2	0	0		?	WBGene00006780;WBGene00002977	B0350.2e;Y105E8A.7b	NA;NA
TSPOP237	2	2	1	1	4	1,NA	WBGene00019245;WBGene00001017	H27M09.1;ZK593.5e	CEOP1902;NA
TSPOP238	2	2	1	1	2	1,NA	WBGene00011631;WBGene00012144	T08G11.4b;T28H10.3	CEOP1508;NA
TSPOP239	2	2	1	1	2	1,NA	WBGene00020391;WBGene00022855	T10B5.5b;ZK1127.9b	CEOP5560;NA
TSPOP24	2	2	2	1	5	reversed	WBGene00195239;WBGene00022852	ZK1127.13;ZK1127.5	CEOP2280;CEOP2280
TSPOP240	2	2	2	2	3,2	?	WBGene00007021;WBGene00011274	C24H11.6;R53.5	CEOP3831;CEOP2734
TSPOP241	2	2	0	0		?	WBGene00000875;WBGene00004180	K08E3.6;F58A4.4a	NA;NA
TSPOP242	2	2	1	1	4	1,NA	WBGene00007617;WBGene00016015	C15H11.9;C23G10.8	CEOP5416;NA
TSPOP243	2	2	0	0		?	WBGene00017758;WBGene00004873	F23H11.2;Y47D3A.26c	NA;NA
TSPOP244	2	2	2	1	2	identical	WBGene00004460;WBGene00016249	C30C11.2;C30C11.1	CEOP3528;CEOP3528
TSPOP245	2	2	1	1	3	1,NA	WBGene00018131;WBGene00021738	F37A4.1;Y50D4A.4a	CEOP3400;NA
TSPOP246	2	2	1	1	2	1,NA	WBGene00016591;WBGene00016469	C42C1.13b;C36B7.6	CEOP4504;NA
TSPOP247	2	2	2	2	3,2	?	WBGene00013735;WBGene00015160	Y111B2A.12b;B0361.6	CEOP3766;CEOP3833
TSPOP248	2	2	0	0		?	WBGene00017673;WBGene00014205	F21F3.3;ZK1058.5	NA;NA
TSPOP249	2	1	0	0		?	WBGene00008882	F16B12.6	NA
TSPOP25	3	1	1	1	3	?	WBGene00003870	C18E9.11a	CEOP2404
TSPOP250	2	2	1	1	2	1,NA	WBGene00000536;WBGene00017010	ZC395.2;D1007.15a	CEOP3280;NA
TSPOP251	2	2	1	1	4	1,NA	WBGene00015809;WBGene00021815	C16A3.4;Y53G8AR.8	CEOP3364;NA
TSPOP252	2	2	2	2	2,2	?	WBGene00014218;WBGene00022192	ZK1098.1a;Y71H2B.2	CEOP3596;CEOP3853
TSPOP253	2	1	1	1	2	?	WBGene00013237	Y56A3A.19	CEOP3738
TSPOP254	2	2	1	1	5	1,NA	WBGene00009648;WBGene00016503	F43C1.3;C37C3.11	CEOP3164;NA
TSPOP255	3	3	2	1	2	2,1,NA	WBGene00010333;WBGene00003882;WBGene00007186	F59E10.3;F59E10.1;B0464.6	CEOP2508;CEOP2508;NA
TSPOP256	3	3	2	2	3,2	?	WBGene00019301;WBGene00021311;WBGene00003593	K02D10.1b;Y32H12A.2a;F42A10.2a	CEOP3540;CEOP3292;NA
TSPOP257	2	2	1	1	5	1,NA	WBGene00010809;WBGene00004255	M01F1.3;T20G5.5	CEOP3124;NA
TSPOP258	2	1	0	0		?	WBGene00000532	C07H4.2	NA
TSPOP259	2	2	2	2	2,2	?	WBGene00015173;WBGene00015648	B0412.3a;C09F5.2a	CEOP3036;CEOP3859
TSPOP26	2	1	2	1	2	1,1	WBGene00012765;WBGene00012765	Y41E3.7c;Y41E3.7a	CEOP4581;CEOP4581
TSPOP260	2	2	1	1	4	1,NA	WBGene00000985;WBGene00003033	C15H11.4;F34D10.5	CEOP5416;NA
TSPOP261	4	4	3	2	3,5	?	WBGene00020189;WBGene00001660;WBGene00001661;WBGene00020443	T03F1.7;C34E10.3;C34E10.2;T12A2.15a	CEOP1120;CEOP3272;CEOP3272;NA
TSPOP262	2	2	1	1	3	1,NA	WBGene00006515;WBGene00015104	C05D11.3;B0280.9	CEOP3376;NA
TSPOP263	3	3	2	2	2,3	?	WBGene00022166;WBGene00022167;WBGene00006484	Y71H2AM.1;Y71H2AM.2;F08A8.6	CEOP5632;CEOP3086;NA
TSPOP264	2	1	1	1	3	?	WBGene00007013	Y62F5A.1b	CEOP2552
TSPOP265	2	2	1	1	2	1,NA	WBGene00020268;WBGene00002079	T05H4.5;Y48G1A.5a	CEOP5112;NA
TSPOP266	2	2	1	1	2	1,NA	WBGene00020268;WBGene00002079	T05H4.5;Y48G1A.5a	CEOP5112;NA
TSPOP267	2	2	1	1	2	1,NA	WBGene00012187;WBGene00001166	W01G7.3;ZK328.2	CEOP2624;NA
TSPOP268	2	2	1	1	2	1,NA	WBGene00007912;WBGene00017963	C34B7.2;F31F4.17	CEOP1464;NA
TSPOP269	2	2	1	1	3	1,NA	WBGene00022402;WBGene00006780	Y97E10AR.7;B0350.2h	CEOP5172;NA
TSPOP27	2	1	0	0		?	WBGene00011095	R07B7.11	NA
TSPOP270	4	3	2	1	2	1,2,NA	WBGene00018431;WBGene00022576;WBGene00009966	F44E7.9;ZC250.2;F53B7.3	CEOP5084;CEOP5084;NA
TSPOP271	2	2	0	0		?	WBGene00000224;WBGene00000433	F26D10.9a;ZK265.4a	NA;NA
TSPOP272	2	2	2	2	2,3	?	WBGene00021350;WBGene00019460	Y37E3.8a;K06H7.9	CEOP1032;CEOP3480
TSPOP273	2	1	0	0		?	WBGene00013123	Y52B11A.3a	NA
TSPOP274	2	2	2	2	4,3	?	WBGene00019612;WBGene00003059	K10B3.6d;C48E7.3	CEOPX036;CEOP1316
TSPOP275	2	1	0	0		?	WBGene00003417	Y41C4A.14	NA
TSPOP276	2	2	1	1	2	1,NA	WBGene00001618;WBGene00002261	C43H6.9c;F58A3.1a	CEOPX032;NA
TSPOP277	2	2	1	1	2	1,NA	WBGene00018077;WBGene00014224	F35H12.5a;ZK1098.7	CEOPX008;NA
TSPOP278	2	2	0	0		?	WBGene00007972;WBGene00011543	C36B1.5;T06E8.1a	NA;NA
TSPOP279	2	2	1	1	2	1,NA	WBGene00021363;WBGene00012550	Y37E11AL.8;Y37D8A.10	CEOP4653;NA
TSPOP28	2	2	0	0		?	WBGene00009226;WBGene00015926	F28G4.1;C17H11.6b	NA;NA
TSPOP280	2	2	0	0		?	WBGene00010496;WBGene00018872	K02B12.3;F55C12.5a	NA;NA
TSPOP281	2	1	0	0		?	WBGene00010776	K11E4.4b	NA
TSPOP282	2	2	2	2	4,1	?	WBGene00017293;WBGene00016427	F09E5.17;C34H4.5a	CEOP2168;CEOP4631
TSPOP283	2	2	0	0		?	WBGene00000377;WBGene00008860	T05C12.7;F15D4.3	NA;NA
TSPOP284	2	2	1	1	2	1,NA	WBGene00020366;WBGene00006309	T08G2.3;D1014.1	CEOPX144;NA
TSPOP285	2	2	0	0		?	WBGene00013702;WBGene00016800	Y106G6D.6;C50C3.2	NA;NA
TSPOP286	2	1	0	0		?	WBGene00007059	F08C6.3	NA
TSPOP287	2	2	1	1	5	1,NA	WBGene00001092;WBGene00004377	F53A2.5;F49E7.1a	CEOP3784;NA
TSPOP288	2	2	1	1	2	1,NA	WBGene00020417;WBGene00008920	T10E9.7;F17C11.9a	CEOP1326;NA
TSPOP289	2	2	1	1	2	1,NA	WBGene00011247;WBGene00002248	R11D1.9;T22A3.8	CEOP5368;NA
TSPOP29	2	2	2	2	3,6	?	WBGene00004278;WBGene00018070	Y62E10A.9;F35H10.5	CEOP4544;CEOP4280
TSPOP290	2	2	0	0		?	WBGene00007959;WBGene00000774	C35C5.10a;F56A8.6	NA;NA
TSPOP291	2	2	1	1	2	1,NA	WBGene00001151;WBGene00004488	F38H4.8a;T05F1.3	CEOP4660;NA
TSPOP292	2	2	2	2	3,2	?	WBGene00011722;WBGene00009551	T11G6.8a;F38H4.10	CEOP4396;CEOP4480
TSPOP294	2	2	0	0		?	WBGene00011511;WBGene00003084	T05H10.7b;R160.7	NA;NA
TSPOP295	2	2	1	1	2	1,NA	WBGene00011016;WBGene00018076	R04F11.3;F35H12.4	CEOP5344;NA
TSPOP296	2	2	1	1	6	1,NA	WBGene00013804;WBGene00010386	Y116A8C.27a;H12D21.10a	CEOP4596;NA
TSPOP297	2	1	0	0		?	WBGene00001559	F45H7.2d	NA
TSPOP298	2	2	1	1	5	1,NA	WBGene00008236;WBGene00007784	C50F4.12;C27H6.2	CEOP5232;NA
TSPOP299	2	2	1	1	2	1,NA	WBGene00013236;WBGene00000800	Y56A3A.18;Y23H5A.7c	CEOP3740;NA
TSPOP3	2	2	1	1	2	1,NA	WBGene00007528;WBGene00014215	C11H1.2;ZK1086.1b	CEOPX134;NA
TSPOP30	2	1	1	1	3	?	WBGene00022803	ZK688.9	CEOP3462
TSPOP300	2	2	1	1	2	1,NA	WBGene00017919;WBGene00016611	F29B9.1;C43G2.2b	CEOP4136;NA
TSPOP301	2	2	2	2	3,4	?	WBGene00008685;WBGene00006931	F11A10.4a;T20D3.7d	CEOP4492;CEOP4328
TSPOP302	2	2	1	1	2	1,NA	WBGene00022056;WBGene00015913	Y67D2.6;C17F4.7	CEOP3860;NA
TSPOP303	2	2	1	1	3	1,NA	WBGene00009992;WBGene00000478	F53F4.10;F27E11.3	CEOP5392;NA
TSPOP304	2	2	1	1	2	1,NA	WBGene00011017;WBGene00018181	R04F11.5;F38E1.9	CEOP5344;NA
TSPOP305	2	2	0	0		?	WBGene00021292;WBGene00013093	Y25C1A.5;Y51H1A.2e	NA;NA
TSPOP306	2	1	1	1	2	?	WBGene00013789	Y116A8C.9a	CEOP4592
TSPOP307	2	2	0	0		?	WBGene00009145;WBGene00003411	F26A3.7;F14F4.3	NA;NA
TSPOP308	3	3	1	1	2	1,NA,NA	WBGene00022296;WBGene00019953;WBGene00018135	Y76B12C.2;R08C7.10b;F37A4.5	CEOP4056;NA;NA
TSPOP309	2	2	1	1	2	1,NA	WBGene00003582;WBGene00008430	F52G2.1c;D2085.5b	CEOP4556;NA
TSPOP31	2	1	1	1	3	?	WBGene00007101	B0024.11	CEOP5252
TSPOP311	2	2	1	1	6	1,NA	WBGene00004882;WBGene00017241	F46B6.3b;F08C6.2b	CEOP5236;NA
TSPOP312	2	2	2	1	2	identical	WBGene00007113;WBGene00007114	B0035.15;B0035.16	CEOP4428;CEOP4428
TSPOP313	2	2	1	1	3	1,NA	WBGene00013434;WBGene00009211	Y66D12A.8a;F28D1.1	CEOP3723;NA
TSPOP314	2	2	1	1	2	1,NA	WBGene00010725;WBGene00007531	K09E9.2;C11H1.7a	CEOPX156;NA
TSPOP315	2	1	0	0		?	WBGene00019148	H03E18.1	NA
TSPOP316	2	2	0	0		?	WBGene00003562;WBGene00009793	F09G8.4;F46F6.2a	NA;NA
TSPOP317	2	2	1	1	2	1,NA	WBGene00003064;WBGene00022269	R10H10.1;Y73E7A.2	CEOP4376;NA
TSPOP318	2	2	0	0		?	WBGene00007179;WBGene00006836	B0457.4;C47E8.7	NA;NA
TSPOP319	3	2	0	0		?	WBGene00008785;WBGene00019414	F14B6.4;K05F6.3	NA;NA
TSPOP32	2	2	2	1	4	identical	WBGene00004055;WBGene00018356	B0218.3;F42G8.5	CEOP4272;CEOP4272
TSPOP320	2	2	1	1	2	1,NA	WBGene00015513;WBGene00017814	C06A8.2;F26A10.2	CEOP2731;NA
TSPOP321	2	2	1	1	4	1,NA	WBGene00013218;WBGene00012830	Y54G11A.9;Y43F8C.8	CEOP2636;NA
TSPOP322	2	2	0	0		?	WBGene00007260;WBGene00004854	C02C6.2a;F40E10.4	NA;NA
TSPOP323	2	1	1	1	2	?	WBGene00021348	Y37E3.4	CEOP1028
TSPOP324	2	2	0	0		?	WBGene00016406;WBGene00002031	C34D10.1;Y34B4A.3	NA;NA
TSPOP325	2	2	2	2	2,2	?	WBGene00011239;WBGene00020909	R11A8.5;W01A11.1a	CEOP4372;CEOP5118
TSPOP326	2	1	1	1	2	?	WBGene00017016	D1014.3a	CEOP5180
TSPOP327	2	2	0	0		?	WBGene00016678;WBGene00010699	C45G9.7;K08H10.9	NA;NA
TSPOP328	2	2	1	1	4	1,NA	WBGene00018610;WBGene00017313	F48E8.3;F09G2.4	CEOP3304;NA
TSPOP329	2	2	1	1	2	1,NA	WBGene00016496;WBGene00011175	C37C3.2;R09E10.5	CEOP5611;NA
TSPOP33	2	2	0	0		?	WBGene00006619;WBGene00008029	ZK546.15;C39E9.5	NA;NA
TSPOP330	2	2	2	2	2,2	?	WBGene00013332;WBGene00010037	Y57G11C.43;F54C8.4a	CEOP4667;CEOP3580
TSPOP331	2	2	2	2	3,3	?	WBGene00007760;WBGene00011067	C27B7.2;R06F6.2	CEOP4312;CEOP2504
TSPOP332	2	2	1	1	3	1,NA	WBGene00017062;WBGene00007980	D2063.3a;C36E8.1	CEOP5052;NA
TSPOP333	2	1	0	0		?	WBGene00011834	T19B10.6	NA
TSPOP334	2	2	1	1	2	1,NA	WBGene00010231;WBGene00003394	F58B3.4;T07H6.2	CEOP4460;NA
TSPOP335	2	2	1	1	3	1,NA	WBGene00004205;WBGene00004446	F29B9.4b;T24B8.1a	CEOP4128;NA
TSPOP336	2	1	1	1	2	?	WBGene00017360	F10E9.11	CEOP3504
TSPOP337	3	3	3	2	2,3	?	WBGene00006369;WBGene00010993;WBGene00011334	R03E1.1;R03E1.2;T01E8.6	CEOPX128;CEOPX128;CEOP2472
TSPOP338	2	2	1	1	4	1,NA	WBGene00006446;WBGene00009200	F28F8.6;F28C1.1	CEOP5444;NA
TSPOP34	2	2	0	0		?	WBGene00021930;WBGene00021920	Y55F3AM.13;Y55F3AM.1	NA;NA
TSPOP340	2	2	1	1	4	1,NA	WBGene00021377;WBGene00019825	Y37E11B.5;R02D3.8	CEOP4100;NA
TSPOP341	2	2	1	1	2	1,NA	WBGene00006647;WBGene00019998	F53G2.6a;R10H1.1	CEOP2070;NA
TSPOP342	2	2	1	1	2	1,NA	WBGene00019333;WBGene00016331	K02F3.10;C32F10.1b	CEOP3040;NA
TSPOP343	2	2	0	0		?	WBGene00000368;WBGene00010933	T28F2.5;M162.7	NA;NA
TSPOP345	3	3	2	1	5	1,2,NA	WBGene00019005;WBGene00019006;WBGene00007953	F57B10.8;F57B10.9;C35A5.9	CEOP1332;CEOP1332;NA
TSPOP346	2	1	0	0		?	WBGene00013151	Y53F4B.4b	NA
TSPOP347	2	2	2	1	2	reversed	WBGene00013994;WBGene00003074	ZK524.4;ZK524.3a	CEOP1396;CEOP1396
TSPOP348	2	2	1	1	2	1,NA	WBGene00006434;WBGene00013668	F09E5.15c;Y105E8A.3	CEOP2745;NA
TSPOP349	2	2	2	1	3	identical	WBGene00016621;WBGene00016622	C43H8.1;C43H8.2	CEOP1628;CEOP1628
TSPOP35	2	2	2	1	2	reversed	WBGene00009726;WBGene00000222	F45E6.3;F45E6.2	CEOPX108;CEOPX108
TSPOP350	2	1	1	1	2	?	WBGene00013344	Y59A8B.7	CEOP5464
TSPOP351	2	1	0	0		?	WBGene00008136	C47D12.2	NA
TSPOP352	2	2	0	0		?	WBGene00001534;WBGene00006876	F52E1.4a;ZK1151.1b	NA;NA
TSPOP353	2	1	0	0		?	WBGene00022171	Y71H2AM.6a	NA
TSPOP354	2	1	2	1	2	1,1	WBGene00021295;WBGene00021295	Y25C1A.8a;Y25C1A.8a	CEOP2084;CEOP2084
TSPOP355	2	2	1	1	4	1,NA	WBGene00012230;WBGene00006061	W03H9.4b;F30A10.5b	CEOP2628;NA
TSPOP356	2	1	0	0		?	WBGene00007479	C09F9.2	NA
TSPOP357	3	3	1	1	5	1,NA,NA	WBGene00015191;WBGene00009443;WBGene00022277	B0432.10;F35G12.7;Y74C9A.3	CEOP2020;NA;NA
TSPOP358	3	3	2	1	2	2,1,NA	WBGene00007194;WBGene00007189;WBGene00004790	B0491.7;B0491.1;F07H5.2	CEOP2532;CEOP2532;NA
TSPOP359	2	2	2	1	3	reversed	WBGene00018512;WBGene00006919	F46F11.9a;F46F11.5	CEOP1264;CEOP1264
TSPOP36	2	2	1	1	3	1,NA	WBGene00001497;WBGene00019928	T08B2.9b;R07C3.12	CEOP1312;NA
TSPOP360	2	2	0	0		?	WBGene00001209;WBGene00017066	C27D11.1;D2092.5	NA;NA
TSPOP361	2	2	1	1	3	1,NA	WBGene00009286;WBGene00021609	F31C3.4;Y46H3D.4	CEOP1776;NA
TSPOP362	2	2	0	0		?	WBGene00000938;WBGene00016002	C26C6.5a;C18H9.3c	NA;NA
TSPOP363	2	1	0	0		?	WBGene00015522	C06E1.7	NA
TSPOP364	2	2	0	0		?	WBGene00017098;WBGene00015125	E02D9.1c;B0303.3	NA;NA
TSPOP365	2	2	1	1	3	1,NA	WBGene00000426;WBGene00004888	Y106G6E.5b;K12C11.2	CEOP1592;NA
TSPOP366	2	2	1	1	2	1,NA	WBGene00007009;WBGene00021931	Y65B4BR.4d;Y55F3AM.14	CEOP1934;NA
TSPOP367	2	1	0	0		?	WBGene00009450;WBGene00009450	F35H8.6;F35H8.6	NA;NA
TSPOP368	2	2	2	1	4	identical	WBGene00006958;WBGene00011058	R06C1.3a;R06C1.2	CEOP1660;CEOP1660
TSPOP369	2	2	1	1	2	1,NA	WBGene00001056;WBGene00016494	K02F2.1b;C37A2.8a	CEOP1999;NA
TSPOP37	2	2	1	1	2	1,NA	WBGene00006590;WBGene00018700	ZC395.3a;F52E1.13f	CEOP3280;NA
TSPOP370	2	1	1	1	2	?	WBGene00017929	F29C4.7b	CEOP4004
TSPOP371	2	1	1	1	4	?	WBGene00009556	F39B2.5	CEOP1760
TSPOP372	2	2	2	1	3	identical	WBGene00008133;WBGene00008134	C47B2.7b;C47B2.9	CEOP1786;CEOP1786
TSPOP373	2	2	2	2	2,3	?	WBGene00013237;WBGene00009277	Y56A3A.19;F30F8.10b	CEOP3738;CEOP1424
TSPOP374	2	2	0	0		?	WBGene00006449;WBGene00017288	ZK757.3b;F09E5.10	NA;NA
TSPOP375	3	3	2	2	2,2	?	WBGene00020286;WBGene00020441;WBGene00004478	T06A10.3a;T12A2.7;F40F8.10	CEOP4668;CEOP3360;NA
TSPOP376	2	2	1	1	2	1,NA	WBGene00003148;WBGene00022733	H21P03.1;ZK418.3	CEOP4444;NA
TSPOP377	2	2	1	1	2	1,NA	WBGene00021854;WBGene00012398	Y54F10AR.1;Y6E2A.4	CEOP3861;NA
TSPOP378	2	2	0	0		?	WBGene00011910;WBGene00006449	T22B3.2a;ZK757.3a	NA;NA
TSPOP379	2	1	1	1	2	?	WBGene00011867	T20G5.1	CEOP3858
TSPOP380	2	2	1	1	3	1,NA	WBGene00022127;WBGene00006449	Y71F9B.3;ZK757.3b	CEOP1056;NA
TSPOP381	2	2	1	1	3	1,NA	WBGene00012645;WBGene00018213	Y39A1A.6;F39H12.2	CEOP3688;NA
TSPOP382	2	2	1	1	5	1,NA	WBGene00001740;WBGene00004130	ZC395.6;F54E2.3j	CEOP3272;NA
TSPOP383	2	2	1	1	2	1,NA	WBGene00008165;WBGene00006633	C47G2.4;T23D8.2	CEOP2694;NA
TSPOP384	2	2	1	1	2	1,NA	WBGene00015466;WBGene00008225	C05C8.9a;C50B8.3	CEOP5152;NA
TSPOP385	2	2	2	1	2	identical	WBGene00019076;WBGene00019077	F59A3.3;F59A3.4	CEOP1256;CEOP1256
TSPOP386	2	2	1	1	2	1,NA	WBGene00009050;WBGene00004368	F22D6.2;C32E8.7	CEOP1364;NA
TSPOP387	3	3	1	1	2	1,NA,NA	WBGene00003794;WBGene00000417;WBGene00010941	Y41D4B.19b;C48D1.2b;M176.2	CEOP4615;NA;NA
TSPOP388	2	2	2	1	3	identical	WBGene00000158;WBGene00013670	Y105E8A.9;Y105E8A.10c	CEOP1904;CEOP1904
TSPOP389	2	1	0	0		?	WBGene00006824	Y105E8A.6	NA
TSPOP39	3	3	1	1	1	1,NA,NA	WBGene00016592;WBGene00009811;WBGene00003084	C42C1.15;F47B8.10;R160.7	CEOP4508;NA;NA
TSPOP390	2	1	1	1	2	?	WBGene00006751	C32E8.10e	CEOP1112
TSPOP391	2	2	1	1	2	1,NA	WBGene00009452;WBGene00003953	F36A2.2;F39H11.5	CEOP1504;NA
TSPOP392	2	1	0	0		?	WBGene00007705	C25A1.1	NA
TSPOP393	2	1	1	1	2	?	WBGene00004034	F09E5.1	CEOP2745
TSPOP394	2	2	1	1	2	1,NA	WBGene00022045;WBGene00016331	Y66H1A.3;C32F10.1a	CEOP4028;NA
TSPOP395	2	2	1	1	3	1,NA	WBGene00011065;WBGene00010416	R06C7.6;H25P06.1	CEOP1380;NA
TSPOP396	2	1	1	1	4	?	WBGene00018149	F37C12.1	CEOP3416
TSPOP397	2	2	0	0		?	WBGene00000269;WBGene00009035	Y73E7A.7a;F22B3.4	NA;NA
TSPOP398	2	2	1	1	2	1,NA	WBGene00009563;WBGene00010730	F39H2.3;K10C3.2	CEOP1496;NA
TSPOP399	2	2	1	1	4	1,NA	WBGene00010437;WBGene00022199	JC8.5a;Y71H10A.1a	CEOP4536;NA
TSPOP4	3	3	2	2	3,2	?	WBGene00008364;WBGene00007752;WBGene00012927	D1046.3;C26H9A.2d;Y47D3A.14	CEOP4316;CEOP4654;NA
TSPOP40	2	2	1	1	2	1,NA	WBGene00022044;WBGene00006578	Y66H1A.2a;F25H2.1	CEOP4028;NA
TSPOP400	2	2	0	0		?	WBGene00009162;WBGene00001045	F26E4.7a;Y47H9C.5a	NA;NA
TSPOP401	2	1	0	0		?	WBGene00007744	C26D10.3	NA
TSPOP402	2	2	0	0		?	WBGene00001037;WBGene00019673	T05C3.5;K12C11.1a	NA;NA
TSPOP403	2	2	1	1	2	1,NA	WBGene00004895;WBGene00021536	CC4.3;Y42H9AR.1	CEOP1682;NA
TSPOP404	2	2	1	1	4	1,NA	WBGene00011972;WBGene00004194	T23G11.7b;C34C6.6a	CEOP1416;NA
TSPOP405	2	2	1	1	2	1,NA	WBGene00011272;WBGene00012735	R53.2;Y40B1A.4	CEOP2746;NA
TSPOP406	2	2	1	1	2	1,NA	WBGene00017924;WBGene00009307	F29B9.10;F32A11.1	CEOP4132;NA
TSPOP407	2	2	0	0		?	WBGene00004809;WBGene00004807	F44G3.6;F46A9.5	NA;NA
TSPOP408	2	2	2	2	3,2	?	WBGene00010731;WBGene00013041	K10C3.4a;Y49E10.22	CEOP1566;CEOP3893
TSPOP409	2	2	0	0		?	WBGene00006062;WBGene00000792	F30A10.8;F11C7.4	NA;NA
TSPOP41	2	2	2	2	2,2	?	WBGene00001372;WBGene00018161	R09B3.1a;F38A5.2b	CEOP1656;CEOP4184
TSPOP410	2	1	0	0		?	WBGene00021095	W08F4.6	NA
TSPOP411	2	2	0	0		?	WBGene00006807;WBGene00022744	C17D12.2c;ZK470.1	NA;NA
TSPOP412	2	2	0	0		?	WBGene00000670;WBGene00000603	Y41C4A.16;C46A5.3b	NA;NA
TSPOP413	2	2	1	1	3	1,NA	WBGene00012964;WBGene00000776	Y48A6B.3;T03E6.7a	CEOP3712;NA
TSPOP414	2	1	0	0		?	WBGene00000197	F28H1.3	NA
TSPOP415	2	2	2	1	3	identical	WBGene00000812;WBGene00021683	Y48G1C.2a;Y48G1C.10a	CEOP1940;CEOP1940
TSPOP416	3	2	1	1	7	1,NA	WBGene00000796;WBGene00022647	C14A4.4a;ZK54.1a	CEOP2496;NA
TSPOP417	2	1	1	1	4	?	WBGene00008990	F20G4.1	CEOP1432
TSPOP418	2	2	0	0		?	WBGene00009626;WBGene00006657	F42A8.1;T12C9.3f	NA;NA
TSPOP419	2	2	1	1	2	1,NA	WBGene00000549;WBGene00001771	R107.6b;T28A11.11	CEOP3572;NA
TSPOP42	2	2	2	1	2	identical	WBGene00003061;WBGene00022835	ZK973.10;ZK973.9	CEOP1176;CEOP1176
TSPOP420	4	4	2	2	3,5	?	WBGene00009187;WBGene00016142;WBGene00013043;WBGene00019143	F27D4.1;C26E6.6;Y49E10.24a;H01M10.1	CEOP1989;CEOP3244;NA;NA
TSPOP421	2	2	1	1	2	1,NA	WBGene00017088;WBGene00013852	E01A2.6;ZC101.3	CEOP1892;NA
TSPOP422	2	1	0	0		?	WBGene00016422	C34G6.6c	NA
TSPOP423	2	2	2	2	2,2	?	WBGene00004355;WBGene00011629	T07D4.3a;T08G11.1b	CEOP2706;CEOP1508
TSPOP424	2	1	1	1	4	?	WBGene00010766	K11B4.1	CEOP1764
TSPOP425	2	2	2	1	7	reversed	WBGene00007564;WBGene00007556	C14A4.14;C14A4.3	CEOP2496;CEOP2496
TSPOP426	2	1	0	0		?	WBGene00011580	T07D4.4e	NA
TSPOP427	2	1	0	0		?	WBGene00003928	ZK945.2	NA
TSPOP428	2	2	2	2	4,3	?	WBGene00001486;WBGene00009002	F59G1.7;F21C3.3	CEOP2232;CEOP1384
TSPOP429	2	1	1	1	2	?	WBGene00004029	K09B11.1a	CEOP4552
TSPOP43	2	2	2	2	4,2	?	WBGene00019535;WBGene00013920	K08D10.12a;ZC506.3	CEOP4116;CEOPX107
TSPOP430	2	2	1	1	2	1,NA	WBGene00011940;WBGene00022391	T23B5.3c;Y95B8A.12e	CEOP4626;NA
TSPOP431	2	2	2	1	2	identical	WBGene00005025;WBGene00016889	C52E12.3;C52E12.4	CEOP2276;CEOP2276
TSPOP432	2	1	1	1	2	?	WBGene00008078	C44B9.1	CEOP3813
TSPOP434	2	2	2	2	2,2	?	WBGene00022450;WBGene00022453	Y110A2AM.3a;Y110A2AR.3a	CEOP2074;CEOP2076
TSPOP435	2	2	0	0		?	WBGene00009217;WBGene00007302	F28D1.8;C04F12.8	NA;NA
TSPOP436	2	2	1	1	2	1,NA	WBGene00006833;WBGene00019491	F53F10.4c;K07E3.2	CEOP1116;NA
TSPOP437	2	2	2	1	6	reversed	WBGene00019221;WBGene00003390	H20J04.6;H20J04.8	CEOP2124;CEOP2124
TSPOP438	2	1	1	1	5	?	WBGene00008458	E02H1.6	CEOP2436
TSPOP439	2	1	1	1	2	?	WBGene00007603	C15C6.4	CEOP1664
TSPOP44	2	2	2	2	3,2	?	WBGene00021904;WBGene00001566	Y55B1AL.2;C28C12.9	CEOP3828;CEOP4292
TSPOP440	2	1	0	0		?	WBGene00017904	F28F5.3c	NA
TSPOP442	2	1	0	0		?	WBGene00009552	F39B1.1	NA
TSPOP443	2	2	2	2	4,2	?	WBGene00006946;WBGene00012714	C34E10.4b;Y39E4B.1	CEOP3268;CEOP3819
TSPOP444	2	2	0	0		?	WBGene00016674;WBGene00011441	C45G9.2;T04F8.2	NA;NA
TSPOP445	2	2	0	0		?	WBGene00000959;WBGene00000817	F46H6.2a;B0547.1	NA;NA
TSPOP446	2	1	0	0		?	WBGene00019627	K10D2.1a	NA
TSPOP447	1	1	1	1	4	?	WBGene00000202	Y6D11A.1	CEOP3044
TSPOP448	2	2	0	0		?	WBGene00021929;WBGene00005950	Y55F3AM.12;T07H8.3	NA;NA
TSPOP449	2	2	1	1	2	1,NA	WBGene00000184;WBGene00004298	Y116A8C.12;W06D4.6	CEOP4669;NA
TSPOP45	2	2	2	2	2,2	?	WBGene00018513;WBGene00011776	F46F11.10;T14G10.7	CEOP1272;CEOP4356
TSPOP450	2	2	2	2	3,4	?	WBGene00013361;WBGene00010721	Y60A3A.13c;K09E4.3a	CEOP5496;CEOP2628
TSPOP451	2	2	1	1	2	1,NA	WBGene00006708;WBGene00021883	Y54G2A.31;Y54G2A.18	CEOP4072;NA
TSPOP453	2	1	0	0		?	WBGene00000162	W09G10.4a	NA
TSPOP454	2	2	2	2	4,4	?	WBGene00016412;WBGene00016390	C34E10.11;C34B2.5	CEOP3268;CEOP1636
TSPOP455	2	1	0	0		?	WBGene00009881	F49C12.12a	NA
TSPOP456	2	2	0	0		?	WBGene00016758;WBGene00018193	C49A9.4;F39C12.1	NA;NA
TSPOP457	2	2	0	0		?	WBGene00002804;WBGene00005662	Y110A7A.19;W03B1.4a	NA;NA
TSPOP458	2	2	2	1	2	identical	WBGene00001235;WBGene00012756	Y41C4A.10;Y41C4A.9	CEOP3728;CEOP3728
TSPOP459	2	2	1	1	5	1,NA	WBGene00021758;WBGene00009978	Y50D7A.10;F53E4.1b	CEOP3851;NA
TSPOP46	2	2	2	2	2,5	?	WBGene00014938;WBGene00016375	Y62E10A.11;C33H5.8	CEOP4548;CEOP4252
TSPOP460	3	2	2	2	3,3	?	WBGene00006997;WBGene00021208	ZK546.1d;Y18H1A.2a	CEOP2690;CEOP1014
TSPOP461	2	2	0	0		?	WBGene00012739;WBGene00002228	Y40B1B.7;C06G3.2	NA;NA
TSPOP462	1	1	0	0		?	WBGene00016456	C35E7.4	NA
TSPOP463	1	1	1	1	5	?	WBGene00007201	B0564.1a	CEOP4532
TSPOP465	2	1	1	1	2	?	WBGene00017088	E01A2.6	CEOP1892
TSPOP466	1	1	0	0		?	WBGene00000100	C25A11.4m	NA
TSPOP467	2	2	1	1	4	1,NA	WBGene00006946;WBGene00017922	C34E10.4b;F29B9.7	CEOP3268;NA
TSPOP468	2	1	1	1	5	?	WBGene00001823	ZC395.7	CEOP3272
TSPOP469	2	1	0	0		?	WBGene00011280	R74.6	NA
TSPOP47	2	2	2	2	3,3	?	WBGene00015793;WBGene00006392	C15C7.7;K03B4.3a	CEOPX040;CEOP5060
TSPOP470	2	2	1	1	2	1,NA	WBGene00001233;WBGene00011802	T16G1.11;T16G1.9	CEOP5376;NA
TSPOP471	2	1	1	1	4	?	WBGene00017889	F28B3.10	CEOP1208
TSPOP472	2	2	2	2	4,2	?	WBGene00006946;WBGene00012714	C34E10.4b;Y39E4B.1	CEOP3268;CEOP3819
TSPOP473	2	2	2	1	3	identical	WBGene00008006;WBGene00008008	C38D4.5b;C38D4.9	CEOP3220;CEOP3220
TSPOP474	1	1	0	0		?	WBGene00003412	F20B6.3	NA
TSPOP475	2	2	2	2	3,4	?	WBGene00022759;WBGene00000838	ZK546.2b;Y108G3AL.1b	CEOP2690;CEOP5588
TSPOP476	2	2	1	1	2	1,NA	WBGene00013997;WBGene00235263	ZK550.3;Y66H1A.8b	CEOP4600;NA
TSPOP477	2	2	2	2	6,3	?	WBGene00020110;WBGene00015353	R151.7b;C02F5.13	CEOP3424;CEOP3496
TSPOP48	2	2	1	1	2	1,NA	WBGene00011941;WBGene00010033	T23B5.4a;F54B11.10	CEOP4654;NA
TSPOP49	4	3	2	2	3,4	?	WBGene00004424;WBGene00011860;WBGene00006393	JC8.3a;T20D3.8;F48D6.1	CEOP4535;CEOP4328;NA
TSPOP5	2	2	1	1	4	1,NA	WBGene00013462;WBGene00018740	Y67H2A.4d;F53B3.1	CEOP4538;NA
TSPOP50	2	2	1	1	4	1,NA	WBGene00007616;WBGene00007882	C15H11.8;C33A12.3a	CEOP5416;NA
TSPOP51	2	1	0	0		?	WBGene00006460;WBGene00006460	F25D1.1c;F25D1.1b	NA;NA
TSPOP52	2	2	2	2	3,3	?	WBGene00019822;WBGene00021515	R02D3.4b;Y41D4B.12a	CEOP4008;CEOP4047
TSPOP53	2	2	2	2	3,6	?	WBGene00013376;WBGene00015238	Y62E10A.6;B0511.13b	CEOP4540;CEOP1632
TSPOP54	2	2	2	2	3,2	?	WBGene00017999;WBGene00016740	F33D4.7;C48B6.2	CEOP4240;CEOP1356
TSPOP55	2	1	1	1	5	?	WBGene00044325	C33H5.19	CEOP4252
TSPOP56	2	2	2	2	2,2	?	WBGene00020215;WBGene00013176	T04G9.4;Y53F4B.39a	CEOPX147;CEOP2660
TSPOP57	5	5	3	3	2,2,2	?	WBGene00000764;WBGene00018723;WBGene00021715;WBGene00001808;WBGene00004482	T03F1.2;F53A3.7;Y49F6B.2;T10G3.6a;C16A3.9	CEOP1124;CEOP3845;CEOP2108;NA;NA
TSPOP58	2	2	0	0		?	WBGene00044620;WBGene00006760	T22B11.2;H14N18.1b	NA;NA
TSPOP59	2	2	0	0		?	WBGene00013963;WBGene00022173	ZK287.2a;Y71H2AM.8	NA;NA
TSPOP6	2	2	2	1	3	identical	WBGene00008006;WBGene00008008	C38D4.5a;C38D4.9	CEOP3220;CEOP3220
TSPOP60	2	2	1	1	2	1,NA	WBGene00007588;WBGene00020365	C14C10.5b;T08G2.2	CEOP5574;NA
TSPOP61	2	2	1	1	4	1,NA	WBGene00001093;WBGene00015338	T12E12.4b;C02E7.1b	CEOP4168;NA
TSPOP62	2	2	1	1	3	1,NA	WBGene00011122;WBGene00018994	R07H5.2a;F56H1.3	CEOP4424;NA
TSPOP63	2	2	1	1	4	1,NA	WBGene00015091;WBGene00003062	B0261.1;K09H9.6	CEOP1228;NA
TSPOP65	2	2	0	0		?	WBGene00022172;WBGene00003008	Y71H2AM.7;Y54G2A.1	NA;NA
TSPOP66	3	3	2	2	6,5	?	WBGene00044310;WBGene00013678;WBGene00020471	H20J04.9;Y105E8A.20b;T13B5.3	CEOP2124;CEOP1736;NA
TSPOP67	2	2	0	0		?	WBGene00008927;WBGene00020437	F17H10.3b;T12A2.2	NA;NA
TSPOP68	2	1	1	1	4	?	WBGene00016392	C34B2.7	CEOP1636
TSPOP69	2	2	1	1	2	1,NA	WBGene00015159;WBGene00043705	B0361.5b;Y55F3AM.7a	CEOP3833;NA
TSPOP7	2	2	1	1	3	1,NA	WBGene00004326;WBGene00019600	T20G5.11;K09H11.3	CEOP3660;NA
TSPOP70	2	2	2	1	2	identical	WBGene00004759;WBGene00008452	F45D3.5;E02A10.1	CEOP5356;CEOP5356
TSPOP71	2	2	0	0		?	WBGene00018547;WBGene00021899	F47C12.2;Y54H5A.1	NA;NA
TSPOP72	2	2	1	1	2	1,NA	WBGene00001366;WBGene00004276	C33D9.1c;K09A9.2	CEOP4610;NA
TSPOP73	2	2	1	1	2	1,NA	WBGene00011687;WBGene00018833	T10C6.5;F54F2.5a	CEOP5452;NA
TSPOP74	2	1	1	1	6	?	WBGene00020113	R151.10	CEOP3424
TSPOP75	2	1	0	0		?	WBGene00006368	C54H2.1a	NA
TSPOP76	2	2	1	1	8	1,NA	WBGene00012996;WBGene00006512	Y48C3A.16;F18E2.2	CEOP2606;NA
TSPOP77	2	1	0	0		?	WBGene00007007	C44C8.6	NA
TSPOP78	2	2	1	1	2	1,NA	WBGene00021313;WBGene00012530	Y32H12A.5;Y32F6A.5b	CEOP3802;NA
TSPOP79	3	2	0	0		?	WBGene00009882;WBGene00001177	F49C12.13;B0348.4y	NA;NA
TSPOP8	2	2	1	1	2	1,NA	WBGene00003389;WBGene00020562	K03H1.2;T19C3.4	CEOP3642;NA
TSPOP80	4	4	1	1	2	1,NA,NA,NA	WBGene00001590;WBGene00006853;WBGene00008586;WBGene00019898	C45G3.3;C47G2.2;F08G12.2;R05G6.4	CEOP1986;NA;NA;NA
TSPOP81	2	1	1	1	2	?	WBGene00004031	T13F2.3b	CEOP4624
TSPOP82	2	1	1	1	2	?	WBGene00013144	Y53C12B.2	CEOP2452
TSPOP83	2	2	0	0		?	WBGene00007022;WBGene00012626	ZK970.3;Y38H6C.14	NA;NA
TSPOP84	2	2	2	2	2,2	?	WBGene00016194;WBGene00044077	C28H8.3;T18H9.7a	CEOP3350;CEOP5220
TSPOP85	2	2	1	1	2	1,NA	WBGene00018878;WBGene00012530	F55D10.3;Y32F6A.5b	CEOPX048;NA
TSPOP86	2	2	1	1	4	1,NA	WBGene00006349;WBGene00021416	F39B2.4a;Y38F2AL.2	CEOP1760;NA
TSPOP87	2	1	0	0		?	WBGene00002066	M110.4a	NA
TSPOP88	2	2	0	0		?	WBGene00003813;WBGene00011286	C08B11.4;R90.4	NA;NA
TSPOP89	2	1	0	0		?	WBGene00006452;WBGene00006452	R148.6;R148.6	NA;NA
TSPOP9	2	2	1	1	2	1,NA	WBGene00007668;WBGene00012717	C18B12.6;Y39E4B.6b	CEOPX132;NA
TSPOP90	3	3	0	0		?	WBGene00002162;WBGene00004979;WBGene00021281	F42G8.12;F42G8.11;Y24D9A.1a	NA;NA;NA
TSPOP91	2	2	2	2	4,3	?	WBGene00011634;WBGene00013406	T09A5.5;Y63D3A.7	CEOP2312;CEOP1731
TSPOP92	3	3	0	0		?	WBGene00010812;WBGene00011887;WBGene00007643	M01F1.6;T21B10.5a;C17E4.3	NA;NA;NA
TSPOP93	2	2	1	1	3	1,NA	WBGene00013587;WBGene00004188	Y80D3A.9;W07E6.4	CEOP5476;NA
TSPOP94	2	2	2	2	2,2	?	WBGene00000962;WBGene00000181	T21E12.4b;F01G4.2a	CEOP1994;CEOP4412
TSPOP95	2	1	0	0		?	WBGene00012814	Y43F8B.3e	NA
TSPOP96	2	1	0	0		?	WBGene00012814	Y43F8B.3e	NA
TSPOP97	2	1	0	0		?	WBGene00018468	F45E4.3e	NA
TSPOP98	2	2	1	1	3	1,NA	WBGene00010044;WBGene00019207	F54C9.9;H17B01.1a	CEOP2368;NA
TSPOP99	2	1	1	1	2	?	WBGene00002497	F52H3.1	CEOP2696

## Sheet: BT8u
T. spiralis operon	Genes	Homologous C. elegans genes	Homologous C. elegans operonic genes	C. elegans operons	C. elegans operon sizes	Synteny	C. elegans gene IDs	C. elegans gene names	C. elegans operon IDs
TSPOP1	2	1	1	1	8	?	WBGene00021655	Y48A5A.1	CEOP4052
TSPOP10	2	2	2	2	2,4	?	WBGene00006701;WBGene00008664	C35B1.1;F10G8.6	CEOP4112;CEOP1584
TSPOP100	2	1	1	1	3	?	WBGene00044025	T01G1.4	CEOP4639
TSPOP101	2	2	0	0		?	WBGene00012916;WBGene00044631	Y46G5A.28;F55A11.5	NA;NA
TSPOP102	2	2	2	1	2	reversed	WBGene00021423;WBGene00021421	Y38F2AR.5b;Y38F2AR.3a	CEOP4060;CEOP4060
TSPOP103	2	2	0	0		?	WBGene00010356;WBGene00001555	H03A11.1;T04D3.4a	NA;NA
TSPOP104	2	2	2	2	2,2	?	WBGene00006497;WBGene00021934	F10G7.1;Y55F3AR.3a	CEOP2132;CEOP4046
TSPOP105	2	2	2	2	4,2	?	WBGene00001860;WBGene00001635	F28B3.7a;Y45F10D.3b	CEOP1208;CEOP4560
TSPOP106	2	2	1	1	4	1,NA	WBGene00012643;WBGene00017605	Y39A1A.3;F19F10.9	CEOP3684;NA
TSPOP107	2	2	2	2	3,2	?	WBGene00006607;WBGene00009084	F57B10.7;F23B12.7	CEOP1336;CEOP5420
TSPOP108	2	2	2	2	6,6	?	WBGene00019163;WBGene00006489	H06H21.6;ZK856.9	CEOP4152;CEOP5248
TSPOP109	2	1	1	1	2	?	WBGene00010304	F59A2.4a	CEOP3108
TSPOP11	2	2	0	0		?	WBGene00002393;WBGene00017046	Y65B4BR.2a;D2021.1a	NA;NA
TSPOP110	2	2	2	2	2,6	?	WBGene00002891;WBGene00019503	C56G2.6a;K07H8.1	CEOP3870;CEOP4280
TSPOP111	2	2	1	1	2	1,NA	WBGene00001983;WBGene00009131	E04A4.4b;F25H8.1b	CEOP4144;NA
TSPOP112	2	1	0	0		?	WBGene00044637	Y47D7A.16a	NA
TSPOP113	2	2	0	0		?	WBGene00016935;WBGene00003153	C54G7.4;Y67D8C.10e	NA;NA
TSPOP114	2	2	2	2	3,3	?	WBGene00007387;WBGene00007020	C06H2.3a;Y104H12D.1a	CEOP5276;CEOP4049
TSPOP115	2	2	0	0		?	WBGene00014095;WBGene00010134	ZK829.4;F55H12.3	NA;NA
TSPOP116	2	2	1	1	3	1,NA	WBGene00006957;WBGene00016844	C07G1.4a;C50F7.4	CEOP4274;NA
TSPOP117	2	2	2	2	3,2	?	WBGene00000996;WBGene00021888	F49E8.5;Y54G2A.23	CEOP4228;CEOP4072
TSPOP118	2	2	0	0		?	WBGene00012887;WBGene00004371	Y45F10D.7;Y42H9B.2	NA;NA
TSPOP119	2	2	0	0		?	WBGene00008281;WBGene00013455	C53D6.4b;Y67A10A.6c	NA;NA
TSPOP12	2	2	2	2	2,3	?	WBGene00022793;WBGene00012966	ZK686.3;Y48A6B.5	CEOP3452;CEOP3712
TSPOP120	3	3	0	0		?	WBGene00014666;WBGene00003963;WBGene00008729	C05D12.3a;C07A12.4a;F13B12.1	NA;NA;NA
TSPOP121	2	2	0	0		?	WBGene00007652;WBGene00004738	C17G1.5;F18E2.3	NA;NA
TSPOP122	2	2	2	2	2,4	?	WBGene00017928;WBGene00022456	F29C4.6;Y110A7A.6b	CEOP4004;CEOP1220
TSPOP123	2	2	1	1	2	1,NA	WBGene00013301;WBGene00022232	Y57G11C.3b;Y73B6BL.3	CEOP4667;NA
TSPOP124	2	1	0	0		?	WBGene00001169;WBGene00001169	R03G5.1a;R03G5.1d	NA;NA
TSPOP125	3	3	2	2	3,6	?	WBGene00013378;WBGene00018072;WBGene00019899	Y62E10A.10;F35H10.7a;R05G6.5	CEOP4544;CEOP4280;NA
TSPOP126	2	2	0	0		?	WBGene00020517;WBGene00010722	T15B7.2;K09E4.4	NA;NA
TSPOP127	2	2	2	2	3,4	?	WBGene00007111;WBGene00000761	B0035.12;C24A11.9	CEOP4440;CEOP1248
TSPOP128	2	2	0	0		?	WBGene00007880;WBGene00003657	C33A12.1;C08F8.8	NA;NA
TSPOP129	2	2	2	2	2,2	?	WBGene00003407;WBGene00009829	F57C12.5c;F47G9.1	CEOPX154;CEOP5522
TSPOP13	2	2	2	1	6	identical	WBGene00006736;WBGene00020422	T10F2.3;T10F2.2	CEOP3260;CEOP3260
TSPOP130	2	1	0	0		?	WBGene00022861	ZK1193.5a	NA
TSPOP131	2	2	0	0		?	WBGene00002140;WBGene00021012	C18H7.2b;W03G1.6c	NA;NA
TSPOP132	2	1	1	1	4	?	WBGene00006724	C08B11.7	CEOP2328
TSPOP133	2	2	2	2	3,3	?	WBGene00022121;WBGene00007645	Y71F9AM.4a;C17E4.6	CEOP1076;CEOP1544
TSPOP134	2	2	1	1	3	1,NA	WBGene00017646;WBGene00006772	F20H11.1;C50C3.9c	CEOP3392;NA
TSPOP135	2	2	2	1	3	reversed	WBGene00013239;WBGene00003594	Y56A3A.22;Y56A3A.13	CEOP3744;CEOP3744
TSPOP136	2	2	2	2	2,3	?	WBGene00022380;WBGene00022381	Y94H6A.8;Y94H6A.9a	CEOP4068;CEOP4665
TSPOP137	2	2	1	1	2	1,NA	WBGene00020030;WBGene00016534	R12E2.1;C39D10.7	CEOP1148;NA
TSPOP138	2	2	1	1	2	1,NA	WBGene00011451;WBGene00017534	T04H1.5;F17A9.2	CEOP5336;NA
TSPOP139	2	2	0	0		?	WBGene00017765;WBGene00017037	F25B4.1;D1069.3b	NA;NA
TSPOP14	2	2	2	2	2,3	?	WBGene00011144;WBGene00021133	R08D7.4b;W10D9.5a	CEOP3560;CEOP2686
TSPOP140	2	2	1	1	3	1,NA	WBGene00044329;WBGene00018281	F11A10.8;F41D9.1	CEOP4490;NA
TSPOP141	2	2	1	1	2	1,NA	WBGene00006918;WBGene00000295	ZK970.4;W01C8.6b	CEOP2476;NA
TSPOP142	2	2	1	1	2	1,NA	WBGene00004494;WBGene00022416	K02B2.5;Y102A11A.6	CEOP4611;NA
TSPOP143	2	2	1	1	6	1,NA	WBGene00020109;WBGene00011939	R151.6;T23B5.1a	CEOP3424;NA
TSPOP144	2	2	2	1	5	reversed	WBGene00023422;WBGene00009648	F43C1.6;F43C1.3	CEOP3164;CEOP3164
TSPOP145	2	2	2	2	2,3	?	WBGene00008769;WBGene00003162	F13G3.11;F20H11.3	CEOP1392;CEOP3392
TSPOP146	2	2	2	1	3	identical	WBGene00006768;WBGene00014027	ZK637.8f;ZK637.9b	CEOP3556;CEOP3556
TSPOP147	2	2	1	1	3	1,NA	WBGene00006540;WBGene00009565	F58A4.8;F39H11.1	CEOP3608;NA
TSPOP148	2	1	0	0		?	WBGene00001281	F10B5.6	NA
TSPOP149	2	2	0	0		?	WBGene00008345;WBGene00219217	C56A3.6c;C08F8.15	NA;NA
TSPOP15	3	3	2	2	2,3	?	WBGene00011144;WBGene00022400;WBGene00010925	R08D7.4b;Y97E10AR.5;M153.2	CEOP3560;CEOP5172;NA
TSPOP150	2	1	0	0		?	WBGene00009342;WBGene00009342	F32H2.5;F32H2.5	NA;NA
TSPOP151	2	1	1	1	2	?	WBGene00002002	K08E7.2	CEOP4520
TSPOP152	2	2	1	1	3	1,NA	WBGene00008684;WBGene00004228	F11A10.3a;R09H10.4	CEOP4490;NA
TSPOP153	3	2	1	1	7	1,NA	WBGene00009735;WBGene00022801	F45G2.9;ZK688.6a	CEOP3792;NA
TSPOP154	2	2	0	0		?	WBGene00011910;WBGene00003999	T22B3.2a;C05A9.1a	NA;NA
TSPOP156	2	2	0	0		?	WBGene00006620;WBGene00002217	C07G1.1;F56E3.3c	NA;NA
TSPOP157	2	1	1	1	2	?	WBGene00000247	T19E7.3a	CEOP4172
TSPOP158	2	2	1	1	2	1,NA	WBGene00017734;WBGene00020216	F23C8.5a;T04G9.5	CEOP1044;NA
TSPOP159	2	2	0	0		?	WBGene00008220;WBGene00012342	C50B6.7;W08D2.7	NA;NA
TSPOP16	2	2	2	2	1,2	?	WBGene00302986;WBGene00013317	Y37E11AM.4;Y57G11C.22a	CEOP5604;CEOP4661
TSPOP160	2	2	1	1	2	1,NA	WBGene00004430;WBGene00019492	Y45F10D.12;K07E3.4b	CEOP4560;NA
TSPOP161	2	2	1	1	3	1,NA	WBGene00015487;WBGene00003047	C05D11.10;T03F6.5	CEOP3372;NA
TSPOP162	2	2	2	2	5,2	?	WBGene00021754;WBGene00010040	Y50D7A.4;F54C8.7d	CEOP3851;CEOP3584
TSPOP163	2	2	0	0		?	WBGene00012600;WBGene00001793	Y38E10A.22a;Y46G5A.31	NA;NA
TSPOP164	2	2	0	0		?	WBGene00022785;WBGene00018867	ZK652.6a;F55A12.10	NA;NA
TSPOP165	2	2	0	0		?	WBGene00020276;WBGene00003802	T05H4.15c;Y56A3A.17	NA;NA
TSPOP166	2	2	1	1	4	1,NA	WBGene00004095;WBGene00003975	F52C9.8f;T28D6.9	CEOP3284;NA
TSPOP167	2	2	1	1	2	1,NA	WBGene00009341;WBGene00012258	F32H2.4;W04G3.5a	CEOP1520;NA
TSPOP168	2	2	0	0		?	WBGene00008749;WBGene00022798	F13E6.5;ZK688.3	NA;NA
TSPOP169	2	2	1	1	2	1,NA	WBGene00018409;WBGene00001579	F44B9.8;F56A11.1	CEOP3472;NA
TSPOP170	2	1	1	1	2	?	WBGene00021021	W04B5.4	CEOP3076
TSPOP171	2	2	0	0		?	WBGene00010229;WBGene00019498	F58A4.6;K07E8.7a	NA;NA
TSPOP172	2	2	0	0		?	WBGene00016400;WBGene00007484	C34D4.4;C09G1.2	NA;NA
TSPOP173	2	2	2	2	2,2	?	WBGene00001258;WBGene00002185	Y80D3A.2e;T27E9.4a	CEOP5472;CEOP3800
TSPOP174	2	2	1	1	6	1,NA	WBGene00020636;WBGene00022664	T20H4.5;ZK121.2	CEOP3424;NA
TSPOP175	2	2	1	1	3	1,NA	WBGene00017981;WBGene00020687	F32D1.1a;T22D1.10	CEOP5052;NA
TSPOP176	2	1	0	0		?	WBGene00003020	C32F10.2	NA
TSPOP177	2	2	1	1	3	1,NA	WBGene00010230;WBGene00001596	F58A4.9;ZC308.1b	CEOP3608;NA
TSPOP178	2	1	1	1	3	?	WBGene00010479	K01G5.8a	CEOP3700
TSPOP179	3	3	1	1	3	1,NA,NA	WBGene00016990;WBGene00010283;WBGene00006786	CD4.4;F58G11.6;Y60A3A.1	CEOP5076;NA;NA
TSPOP18	2	1	0	0		?	WBGene00017166	F01F1.12b	NA
TSPOP180	2	2	0	0		?	WBGene00010283;WBGene00006786	F58G11.6;Y60A3A.1	NA;NA
TSPOP181	2	2	1	1	2	1,NA	WBGene00022599;WBGene00020088	ZC395.10;R119.2	CEOP3276;NA
TSPOP182	2	1	0	0		?	WBGene00007904	C33G3.4	NA
TSPOP183	2	2	1	1	3	1,NA	WBGene00012645;WBGene00019199	Y39A1A.6;H14E04.2b	CEOP3688;NA
TSPOP184	2	2	1	1	2	1,NA	WBGene00009284;WBGene00002071	F31C3.2b;T04G9.3	CEOP1965;NA
TSPOP185	2	2	1	1	2	1,NA	WBGene00017547;WBGene00000101	F18A1.6b;D1022.7c	CEOP2668;NA
TSPOP186	2	2	0	0		?	WBGene00016311;WBGene00001329	C32D5.3;T04C10.2a	NA;NA
TSPOP187	3	2	1	1	2	1,NA	WBGene00006840;WBGene00002008	R05D3.7;F43E2.8a	CEOP3512;NA
TSPOP188	2	1	1	1	2	?	WBGene00015133	B0303.15	CEOP3538
TSPOP189	2	2	0	0		?	WBGene00020160;WBGene00020397	T02C5.3b;T10B11.1	NA;NA
TSPOP19	2	2	1	1	3	1,NA	WBGene00011773;WBGene00011775	T14G10.3;T14G10.5d	CEOP4619;NA
TSPOP190	2	2	0	0		?	WBGene00002179;WBGene00021074	T22C1.7;W07E6.2a	NA;NA
TSPOP191	2	2	1	1	2	1,NA	WBGene00013209;WBGene00019227	Y54G9A.6;H22K11.4a	CEOP2618;NA
TSPOP192	2	2	1	1	3	1,NA	WBGene00016754;WBGene00015168	C48E7.11;B0403.4	CEOP1316;NA
TSPOP193	2	2	1	1	4	1,NA	WBGene00012641;WBGene00016073	Y39A1A.1c;C24H12.4a	CEOP3684;NA
TSPOP194	2	2	2	1	3	reversed	WBGene00023450;WBGene00011730	T12D8.10;T12D8.2	CEOP3818;CEOP3818
TSPOP195	2	2	1	1	2	1,NA	WBGene00022697;WBGene00009288	ZK353.1a;F31C3.6a	CEOP3522;NA
TSPOP196	2	2	1	1	2	1,NA	WBGene00012768;WBGene00006634	Y41E3.10b;F33C8.3	CEOP4685;NA
TSPOP197	2	1	0	0		?	WBGene00013042;WBGene00013042	Y49E10.23b;Y49E10.23a	NA;NA
TSPOP198	2	2	1	1	2	1,NA	WBGene00001233;WBGene00011802	T16G1.11;T16G1.9	CEOP5376;NA
TSPOP199	2	1	0	0		?	WBGene00010488;WBGene00010488	K02A11.3;K02A11.3	NA;NA
TSPOP2	2	2	1	1	4	1,NA	WBGene00012641;WBGene00018793	Y39A1A.1c;F54C4.1	CEOP3684;NA
TSPOP20	2	1	1	1	6	?	WBGene00009771	F46B6.6a	CEOP5236
TSPOP200	2	2	2	2	3,2	?	WBGene00010325;WBGene00021844	F59C6.4;Y54E10BR.5	CEOP1616;CEOP1924
TSPOP201	2	2	2	2	4,3	?	WBGene00010615;WBGene00022188	K07A1.9f;Y71H2AR.1	CEOP1552;CEOP3086
TSPOP202	2	2	0	0		?	WBGene00002203;WBGene00006747	F46F2.2e;R07D5.1j	NA;NA
TSPOP203	2	1	2	1	2	1,1	WBGene00013803;WBGene00013803	Y116A8C.26a;Y116A8C.26b	CEOP4632;CEOP4632
TSPOP204	2	2	1	1	4	1,NA	WBGene00008667;WBGene00007969	F10G8.9b;C36A4.9b	CEOP1584;NA
TSPOP205	2	1	0	0		?	WBGene00010909	M88.7	NA
TSPOP206	2	2	0	0		?	WBGene00006780;WBGene00002977	B0350.2e;Y105E8A.7b	NA;NA
TSPOP207	2	2	1	1	4	1,NA	WBGene00019245;WBGene00001017	H27M09.1;ZK593.5e	CEOP1902;NA
TSPOP208	2	2	1	1	2	1,NA	WBGene00020391;WBGene00022855	T10B5.5b;ZK1127.9b	CEOP5560;NA
TSPOP209	2	2	2	2	3,2	?	WBGene00007021;WBGene00011274	C24H11.6;R53.5	CEOP3831;CEOP2734
TSPOP21	2	2	2	1	5	identical	WBGene00022852;WBGene00195239	ZK1127.5;ZK1127.13	CEOP2280;CEOP2280
TSPOP210	2	2	0	0		?	WBGene00000875;WBGene00004180	K08E3.6;F58A4.4a	NA;NA
TSPOP211	2	2	1	1	4	1,NA	WBGene00007617;WBGene00016015	C15H11.9;C23G10.8	CEOP5416;NA
TSPOP212	2	2	0	0		?	WBGene00017758;WBGene00004873	F23H11.2;Y47D3A.26c	NA;NA
TSPOP213	2	2	2	1	2	reversed	WBGene00016249;WBGene00004460	C30C11.1;C30C11.2	CEOP3528;CEOP3528
TSPOP214	2	2	1	1	3	1,NA	WBGene00018131;WBGene00021738	F37A4.1;Y50D4A.4a	CEOP3400;NA
TSPOP215	2	2	1	1	2	1,NA	WBGene00016591;WBGene00016469	C42C1.13b;C36B7.6	CEOP4504;NA
TSPOP216	2	2	2	2	2,3	?	WBGene00015160;WBGene00013735	B0361.6;Y111B2A.12b	CEOP3833;CEOP3766
TSPOP217	2	2	0	0		?	WBGene00014205;WBGene00017673	ZK1058.5;F21F3.3	NA;NA
TSPOP218	2	1	0	0		?	WBGene00008882	F16B12.6	NA
TSPOP219	2	2	1	1	2	1,NA	WBGene00000536;WBGene00017010	ZC395.2;D1007.15a	CEOP3280;NA
TSPOP22	2	1	1	1	3	?	WBGene00003870	C18E9.11a	CEOP2404
TSPOP220	2	2	1	1	4	1,NA	WBGene00015809;WBGene00021815	C16A3.4;Y53G8AR.8	CEOP3364;NA
TSPOP221	2	2	2	2	2,2	?	WBGene00014218;WBGene00022192	ZK1098.1a;Y71H2B.2	CEOP3596;CEOP3853
TSPOP222	2	1	1	1	2	?	WBGene00013237	Y56A3A.19	CEOP3738
TSPOP223	2	2	1	1	2	1,NA	WBGene00010757;WBGene00016503	K10G9.3b;C37C3.11	CEOP3890;NA
TSPOP224	3	3	2	1	2	2,1,NA	WBGene00010333;WBGene00003882;WBGene00007186	F59E10.3;F59E10.1;B0464.6	CEOP2508;CEOP2508;NA
TSPOP225	3	3	2	2	2,3	?	WBGene00021311;WBGene00019301;WBGene00003593	Y32H12A.2a;K02D10.1b;F42A10.2c	CEOP3292;CEOP3540;NA
TSPOP226	2	2	1	1	5	1,NA	WBGene00010809;WBGene00004255	M01F1.3;T20G5.5	CEOP3124;NA
TSPOP227	2	1	0	0		?	WBGene00000532	C07H4.2	NA
TSPOP228	2	2	2	2	2,2	?	WBGene00015173;WBGene00015648	B0412.3a;C09F5.2a	CEOP3036;CEOP3859
TSPOP229	2	2	1	1	3	1,NA	WBGene00010476;WBGene00003033	K01G5.1;F34D10.5	CEOP3701;NA
TSPOP23	2	2	2	2	3,6	?	WBGene00004278;WBGene00018070	Y62E10A.9;F35H10.5	CEOP4544;CEOP4280
TSPOP230	4	4	3	2	5,3	?	WBGene00001660;WBGene00020189;WBGene00001661;WBGene00020443	C34E10.3;T03F1.7;C34E10.2;T12A2.15a	CEOP3272;CEOP1120;CEOP3272;NA
TSPOP231	2	2	1	1	3	1,NA	WBGene00006515;WBGene00015104	C05D11.3;B0280.9	CEOP3376;NA
TSPOP232	3	3	2	2	2,3	?	WBGene00022166;WBGene00022167;WBGene00006484	Y71H2AM.1;Y71H2AM.2;F08A8.6	CEOP5632;CEOP3086;NA
TSPOP233	2	1	1	1	3	?	WBGene00007013	Y62F5A.1b	CEOP2552
TSPOP234	2	2	1	1	2	1,NA	WBGene00020268;WBGene00002079	T05H4.5;Y48G1A.5a	CEOP5112;NA
TSPOP235	2	2	1	1	2	1,NA	WBGene00020268;WBGene00002079	T05H4.5;Y48G1A.5a	CEOP5112;NA
TSPOP236	2	2	1	1	2	1,NA	WBGene00012187;WBGene00001166	W01G7.3;ZK328.2	CEOP2624;NA
TSPOP237	2	2	1	1	2	1,NA	WBGene00007912;WBGene00017963	C34B7.2;F31F4.17	CEOP1464;NA
TSPOP238	2	2	1	1	3	1,NA	WBGene00022402;WBGene00006780	Y97E10AR.7;B0350.2h	CEOP5172;NA
TSPOP239	3	3	1	1	2	1,NA,NA	WBGene00022576;WBGene00008240;WBGene00009966	ZC250.2;C50H2.4a;F53B7.3	CEOP5084;NA;NA
TSPOP24	2	1	1	1	3	?	WBGene00022803	ZK688.9	CEOP3462
TSPOP240	2	2	1	1	2	1,NA	WBGene00010279;WBGene00000433	F58G11.1b;ZK265.4a	CEOP5398;NA
TSPOP241	2	2	2	2	3,2	?	WBGene00019460;WBGene00021350	K06H7.9;Y37E3.8a	CEOP3480;CEOP1032
TSPOP242	2	2	2	2	3,3	?	WBGene00004479;WBGene00003059	D1007.6;C48E7.3	CEOP1184;CEOP1316
TSPOP243	2	1	0	0		?	WBGene00003417	Y41C4A.14	NA
TSPOP244	2	2	1	1	2	1,NA	WBGene00001618;WBGene00002261	C43H6.9c;F58A3.1a	CEOPX032;NA
TSPOP245	2	2	1	1	3	1,NA	WBGene00016754;WBGene00014224	C48E7.11;ZK1098.7	CEOP1316;NA
TSPOP246	2	1	0	0		?	WBGene00007972;WBGene00007972	C36B1.5;C36B1.5	NA;NA
TSPOP247	2	2	1	1	2	1,NA	WBGene00021363;WBGene00012550	Y37E11AL.8;Y37D8A.10	CEOP4653;NA
TSPOP248	2	2	0	0		?	WBGene00010496;WBGene00018872	K02B12.3;F55C12.5a	NA;NA
TSPOP249	2	2	2	2	4,1	?	WBGene00017293;WBGene00016427	F09E5.17;C34H4.5a	CEOP2168;CEOP4631
TSPOP25	2	1	1	1	3	?	WBGene00007101	B0024.11	CEOP5252
TSPOP250	2	2	0	0		?	WBGene00008860;WBGene00000377	F15D4.3;T05C12.7	NA;NA
TSPOP251	2	2	0	0		?	WBGene00013189;WBGene00006309	Y54E2A.4b;D1014.1	NA;NA
TSPOP252	2	2	0	0		?	WBGene00013702;WBGene00017178	Y106G6D.6;F02E8.5	NA;NA
TSPOP253	2	1	0	0		?	WBGene00007059	F08C6.3	NA
TSPOP254	2	2	0	0		?	WBGene00004377;WBGene00006856	F49E7.1a;C13B4.2	NA;NA
TSPOP255	2	2	1	1	2	1,NA	WBGene00020417;WBGene00008920	T10E9.7;F17C11.9a	CEOP1326;NA
TSPOP256	2	2	0	0		?	WBGene00007959;WBGene00000774	C35C5.10a;F56A8.6	NA;NA
TSPOP257	2	2	1	1	2	1,NA	WBGene00001151;WBGene00004488	F38H4.8a;T05F1.3	CEOP4660;NA
TSPOP258	2	2	2	2	2,3	?	WBGene00002363;WBGene00011722	F38H4.9;T11G6.8a	CEOP4480;CEOP4396
TSPOP26	2	2	0	0		?	WBGene00008029;WBGene00006619	C39E9.5;ZK546.15	NA;NA
TSPOP260	2	2	0	0		?	WBGene00011511;WBGene00003084	T05H10.7b;R160.7	NA;NA
TSPOP261	2	2	1	1	2	1,NA	WBGene00011016;WBGene00018076	R04F11.3;F35H12.4	CEOP5344;NA
TSPOP262	2	2	1	1	6	1,NA	WBGene00013804;WBGene00010386	Y116A8C.27a;H12D21.10a	CEOP4596;NA
TSPOP263	2	1	0	0		?	WBGene00001559	F45H7.2d	NA
TSPOP264	2	2	1	1	2	1,NA	WBGene00013236;WBGene00000800	Y56A3A.18;Y23H5A.7c	CEOP3740;NA
TSPOP265	2	2	1	1	2	1,NA	WBGene00017919;WBGene00016611	F29B9.1;C43G2.2b	CEOP4136;NA
TSPOP266	2	2	1	1	4	1,NA	WBGene00006931;WBGene00000302	T20D3.7b;C56A3.7c	CEOP4328;NA
TSPOP267	2	2	1	1	2	1,NA	WBGene00022056;WBGene00015913	Y67D2.6;C17F4.7	CEOP3860;NA
TSPOP268	2	2	1	1	3	1,NA	WBGene00009992;WBGene00000478	F53F4.10;F27E11.3	CEOP5392;NA
TSPOP269	2	2	1	1	2	1,NA	WBGene00011017;WBGene00018181	R04F11.5;F38E1.9	CEOP5344;NA
TSPOP27	2	1	0	0		?	WBGene00021920	Y55F3AM.1	NA
TSPOP270	2	2	0	0		?	WBGene00013093;WBGene00021292	Y51H1A.2e;Y25C1A.5	NA;NA
TSPOP271	2	2	1	1	2	1,NA	WBGene00013789;WBGene00002163	Y116A8C.9a;C54D1.3c	CEOP4592;NA
TSPOP272	2	2	0	0		?	WBGene00009145;WBGene00003411	F26A3.7;F14F4.3	NA;NA
TSPOP273	3	3	1	1	2	1,NA,NA	WBGene00022296;WBGene00018135;WBGene00019953	Y76B12C.2;F37A4.5;R08C7.10b	CEOP4056;NA;NA
TSPOP274	2	2	1	1	2	1,NA	WBGene00003582;WBGene00008430	F52G2.1c;D2085.5b	CEOP4556;NA
TSPOP275	2	1	1	1	3	?	WBGene00004431	C09D4.5	CEOP1252
TSPOP276	2	2	1	1	6	1,NA	WBGene00004882;WBGene00017241	F46B6.3b;F08C6.2b	CEOP5236;NA
TSPOP277	2	2	2	1	2	reversed	WBGene00007114;WBGene00007113	B0035.16;B0035.15	CEOP4428;CEOP4428
TSPOP278	2	1	0	0		?	WBGene00009211;WBGene00009211	F28D1.1;F28D1.1	NA;NA
TSPOP279	2	2	1	1	2	1,NA	WBGene00010725;WBGene00007531	K09E9.2;C11H1.7a	CEOPX156;NA
TSPOP28	2	2	2	1	2	identical	WBGene00000222;WBGene00009726	F45E6.2;F45E6.3	CEOPX108;CEOPX108
TSPOP280	2	1	0	0		?	WBGene00019148	H03E18.1	NA
TSPOP281	2	2	0	0		?	WBGene00009793;WBGene00003562	F46F6.2a;F09G8.4	NA;NA
TSPOP282	2	2	1	1	2	1,NA	WBGene00003064;WBGene00022269	R10H10.1;Y73E7A.2	CEOP4376;NA
TSPOP283	2	2	0	0		?	WBGene00007179;WBGene00006836	B0457.4;C47E8.7	NA;NA
TSPOP284	3	3	1	1	2	1,NA,NA	WBGene00018088;WBGene00008785;WBGene00019414	F36D4.2;F14B6.4;K05F6.3	CEOP5228;NA;NA
TSPOP285	2	2	1	1	2	1,NA	WBGene00015513;WBGene00017814	C06A8.2;F26A10.2	CEOP2731;NA
TSPOP286	2	2	0	0		?	WBGene00044732;WBGene00000911	T03G11.10;C10C5.6b	NA;NA
TSPOP287	2	2	1	1	4	1,NA	WBGene00013218;WBGene00012830	Y54G11A.9;Y43F8C.8	CEOP2636;NA
TSPOP288	2	2	0	0		?	WBGene00007260;WBGene00004854	C02C6.2a;F40E10.4	NA;NA
TSPOP289	2	1	1	1	2	?	WBGene00021348	Y37E3.4	CEOP1028
TSPOP29	2	2	1	1	3	1,NA	WBGene00001497;WBGene00019928	T08B2.9b;R07C3.12	CEOP1312;NA
TSPOP290	2	2	0	0		?	WBGene00016406;WBGene00002031	C34D10.1;Y34B4A.3	NA;NA
TSPOP291	2	2	1	1	2	1,NA	WBGene00011239;WBGene00009920	R11A8.5;F52B5.1a	CEOP4372;NA
TSPOP292	2	2	0	0		?	WBGene00012337;WBGene00016678	W07G4.3;C45G9.7	NA;NA
TSPOP293	2	2	1	1	4	1,NA	WBGene00018610;WBGene00017313	F48E8.3;F09G2.4	CEOP3304;NA
TSPOP294	2	2	1	1	2	1,NA	WBGene00016496;WBGene00011175	C37C3.2;R09E10.5	CEOP5611;NA
TSPOP295	2	2	2	2	2,2	?	WBGene00010037;WBGene00013332	F54C8.4a;Y57G11C.43	CEOP3580;CEOP4667
TSPOP296	2	2	2	2	3,3	?	WBGene00007760;WBGene00011067	C27B7.2;R06F6.2	CEOP4312;CEOP2504
TSPOP297	2	2	2	2	3,4	?	WBGene00017062;WBGene00000787	D2063.3a;C41D11.8	CEOP5052;CEOP1180
TSPOP298	2	1	0	0		?	WBGene00011834	T19B10.6	NA
TSPOP299	2	2	1	1	2	1,NA	WBGene00010231;WBGene00003394	F58B3.4;T07H6.2	CEOP4460;NA
TSPOP3	2	2	1	1	2	1,NA	WBGene00007528;WBGene00014215	C11H1.2;ZK1086.1b	CEOPX134;NA
TSPOP30	2	2	1	1	2	1,NA	WBGene00006590;WBGene00018700	ZC395.3b;F52E1.13f	CEOP3280;NA
TSPOP300	2	2	1	1	3	1,NA	WBGene00004205;WBGene00004446	F29B9.4b;T24B8.1a	CEOP4128;NA
TSPOP301	2	2	1	1	2	1,NA	WBGene00017360;WBGene00001650	F10E9.11;F25H8.3b	CEOP3504;NA
TSPOP302	3	3	3	2	2,3	?	WBGene00006369;WBGene00011334;WBGene00010993	R03E1.1;T01E8.6;R03E1.2	CEOPX128;CEOP2472;CEOPX128
TSPOP303	2	2	1	1	4	1,NA	WBGene00006446;WBGene00009200	F28F8.6;F28C1.1	CEOP5444;NA
TSPOP304	2	1	0	0		?	WBGene00044773	C08A9.10	NA
TSPOP305	2	2	1	1	4	1,NA	WBGene00021377;WBGene00019825	Y37E11B.5;R02D3.8	CEOP4100;NA
TSPOP306	2	2	1	1	2	1,NA	WBGene00019333;WBGene00016331	K02F3.10;C32F10.1b	CEOP3040;NA
TSPOP308	3	3	2	1	5	2,1,NA	WBGene00019006;WBGene00019005;WBGene00007953	F57B10.9;F57B10.8;C35A5.9	CEOP1332;CEOP1332;NA
TSPOP309	2	2	0	0		?	WBGene00013151;WBGene00002299	Y53F4B.4b;ZK1067.1d	NA;NA
TSPOP31	3	3	1	1	1	1,NA,NA	WBGene00016592;WBGene00003084;WBGene00009811	C42C1.15;R160.7;F47B8.10	CEOP4508;NA;NA
TSPOP310	2	2	1	1	2	1,NA	WBGene00006434;WBGene00013668	F09E5.15c;Y105E8A.3	CEOP2745;NA
TSPOP311	2	2	2	1	3	identical	WBGene00016621;WBGene00016622	C43H8.1;C43H8.2	CEOP1628;CEOP1628
TSPOP312	2	1	1	1	2	?	WBGene00013344	Y59A8B.7	CEOP5464
TSPOP313	2	2	0	0		?	WBGene00008136;WBGene00006390	C47D12.2;ZK1320.12a	NA;NA
TSPOP314	2	2	0	0		?	WBGene00006876;WBGene00001534	ZK1151.1b;F52E1.4a	NA;NA
TSPOP315	2	2	1	1	2	1,NA	WBGene00002134;WBGene00022171	ZK770.3;Y71H2AM.6a	CEOP1108;NA
TSPOP316	2	1	0	0		?	WBGene00007479	C09F9.2	NA
TSPOP317	3	3	1	1	5	1,NA,NA	WBGene00015191;WBGene00009443;WBGene00022277	B0432.10;F35G12.7;Y74C9A.3	CEOP2020;NA;NA
TSPOP318	3	3	2	1	2	2,1,NA	WBGene00007194;WBGene00007189;WBGene00004790	B0491.7;B0491.1;F07H5.2	CEOP2532;CEOP2532;NA
TSPOP319	2	2	2	1	3	reversed	WBGene00018512;WBGene00006919	F46F11.9a;F46F11.5	CEOP1264;CEOP1264
TSPOP32	2	2	1	1	2	1,NA	WBGene00022044;WBGene00006578	Y66H1A.2a;F25H2.1	CEOP4028;NA
TSPOP320	2	2	0	0		?	WBGene00017066;WBGene00001209	D2092.5;C27D11.1	NA;NA
TSPOP321	2	2	2	1	3	identical	WBGene00009285;WBGene00009286	F31C3.3;F31C3.4	CEOP1776;CEOP1776
TSPOP322	2	2	0	0		?	WBGene00000938;WBGene00016002	C26C6.5a;C18H9.3c	NA;NA
TSPOP323	2	2	0	0		?	WBGene00017098;WBGene00015125	E02D9.1c;B0303.3	NA;NA
TSPOP324	2	2	1	1	3	1,NA	WBGene00000426;WBGene00004888	Y106G6E.5b;K12C11.2	CEOP1592;NA
TSPOP325	2	2	1	1	2	1,NA	WBGene00007009;WBGene00021931	Y65B4BR.4d;Y55F3AM.14	CEOP1934;NA
TSPOP326	2	1	0	0		?	WBGene00009450;WBGene00009450	F35H8.6;F35H8.6	NA;NA
TSPOP327	2	2	2	1	4	reversed	WBGene00011058;WBGene00006958	R06C1.2;R06C1.3a	CEOP1660;CEOP1660
TSPOP328	2	2	1	1	2	1,NA	WBGene00001056;WBGene00016494	K02F2.1b;C37A2.8a	CEOP1999;NA
TSPOP329	2	1	1	1	4	?	WBGene00009556	F39B2.5	CEOP1760
TSPOP33	2	2	2	2	2,2	?	WBGene00018161;WBGene00001372	F38A5.2b;R09B3.1a	CEOP4184;CEOP1656
TSPOP330	2	2	2	1	3	identical	WBGene00008133;WBGene00008134	C47B2.7b;C47B2.9	CEOP1786;CEOP1786
TSPOP331	2	2	2	2	2,3	?	WBGene00013237;WBGene00009277	Y56A3A.19;F30F8.10b	CEOP3738;CEOP1424
TSPOP332	2	2	0	0		?	WBGene00011910;WBGene00017288	T22B3.2b;F09E5.10	NA;NA
TSPOP333	3	3	2	2	2,2	?	WBGene00020286;WBGene00020441;WBGene00004478	T06A10.3a;T12A2.7;F40F8.10	CEOP4668;CEOP3360;NA
TSPOP334	2	2	1	1	2	1,NA	WBGene00003148;WBGene00022733	H21P03.1;ZK418.3	CEOP4444;NA
TSPOP335	2	2	1	1	2	1,NA	WBGene00021854;WBGene00012398	Y54F10AR.1;Y6E2A.4	CEOP3861;NA
TSPOP336	2	1	0	0		?	WBGene00011910;WBGene00011910	T22B3.2a;T22B3.2b	NA;NA
TSPOP337	2	1	1	1	2	?	WBGene00011867	T20G5.1	CEOP3858
TSPOP338	2	2	1	1	3	1,NA	WBGene00022127;WBGene00006449	Y71F9B.3;ZK757.3b	CEOP1056;NA
TSPOP339	2	2	1	1	2	1,NA	WBGene00004680;WBGene00018213	C29H12.1;F39H12.2	CEOP2236;NA
TSPOP34	2	2	2	1	2	identical	WBGene00003061;WBGene00022835	ZK973.10;ZK973.9	CEOP1176;CEOP1176
TSPOP340	2	2	2	2	5,2	?	WBGene00001740;WBGene00021714	ZC395.6;Y49F6B.1	CEOP3272;CEOP2108
TSPOP341	2	2	1	1	2	1,NA	WBGene00008165;WBGene00006633	C47G2.4;T23D8.2	CEOP2694;NA
TSPOP342	2	2	1	1	2	1,NA	WBGene00015466;WBGene00008225	C05C8.9a;C50B8.3	CEOP5152;NA
TSPOP343	2	2	2	1	2	identical	WBGene00019076;WBGene00019077	F59A3.3;F59A3.4	CEOP1256;CEOP1256
TSPOP344	2	2	1	1	2	1,NA	WBGene00009050;WBGene00004368	F22D6.2;C32E8.7	CEOP1364;NA
TSPOP345	3	3	1	1	2	1,NA,NA	WBGene00003794;WBGene00010941;WBGene00000417	Y41D4B.19b;M176.2;C48D1.2b	CEOP4615;NA;NA
TSPOP346	2	2	2	1	3	reversed	WBGene00013670;WBGene00000158	Y105E8A.10c;Y105E8A.9	CEOP1904;CEOP1904
TSPOP347	2	1	1	1	3	?	WBGene00007621	C16C2.4a	CEOP1560
TSPOP348	2	2	1	1	2	1,NA	WBGene00009452;WBGene00003953	F36A2.2;F39H11.5	CEOP1504;NA
TSPOP349	2	1	0	0		?	WBGene00007705	C25A1.1	NA
TSPOP35	2	2	2	2	2,4	?	WBGene00013920;WBGene00019535	ZC506.3;K08D10.12a	CEOPX107;CEOP4116
TSPOP350	2	2	1	1	2	1,NA	WBGene00022045;WBGene00016331	Y66H1A.3;C32F10.1a	CEOP4028;NA
TSPOP351	2	2	1	1	3	1,NA	WBGene00011065;WBGene00010416	R06C7.6;H25P06.1	CEOP1380;NA
TSPOP352	2	1	1	1	4	?	WBGene00018149	F37C12.1	CEOP3416
TSPOP353	2	2	0	0		?	WBGene00009035;WBGene00000269	F22B3.4;Y73E7A.7a	NA;NA
TSPOP354	2	2	1	1	2	1,NA	WBGene00009563;WBGene00010730	F39H2.3;K10C3.2	CEOP1496;NA
TSPOP355	2	2	1	1	4	1,NA	WBGene00010437;WBGene00022199	JC8.5a;Y71H10A.1a	CEOP4536;NA
TSPOP356	2	2	0	0		?	WBGene00001037;WBGene00019673	T05C3.5;K12C11.1a	NA;NA
TSPOP357	2	2	1	1	2	1,NA	WBGene00004895;WBGene00021536	CC4.3;Y42H9AR.1	CEOP1682;NA
TSPOP358	2	2	1	1	2	1,NA	WBGene00011272;WBGene00012735	R53.2;Y40B1A.4	CEOP2746;NA
TSPOP359	2	2	1	1	2	1,NA	WBGene00017924;WBGene00009307	F29B9.10;F32A11.1	CEOP4132;NA
TSPOP36	2	2	2	2	2,3	?	WBGene00001566;WBGene00021904	C28C12.9;Y55B1AL.2	CEOP4292;CEOP3828
TSPOP360	2	2	0	0		?	WBGene00004807;WBGene00004809	F46A9.5;F44G3.6	NA;NA
TSPOP361	2	2	2	2	3,2	?	WBGene00010731;WBGene00013041	K10C3.4a;Y49E10.22	CEOP1566;CEOP3893
TSPOP362	2	2	0	0		?	WBGene00006062;WBGene00000792	F30A10.8;F11C7.4	NA;NA
TSPOP363	2	2	0	0		?	WBGene00021095;WBGene00008053	W08F4.6;C41C4.8	NA;NA
TSPOP364	2	2	0	0		?	WBGene00006807;WBGene00012353	C17D12.2b;W09C5.7a	NA;NA
TSPOP365	2	2	0	0		?	WBGene00000603;WBGene00000670	C46A5.3b;Y41C4A.16	NA;NA
TSPOP366	2	2	1	1	3	1,NA	WBGene00012964;WBGene00000776	Y48A6B.3;T03E6.7a	CEOP3712;NA
TSPOP367	2	2	2	1	3	reversed	WBGene00021683;WBGene00000812	Y48G1C.10a;Y48G1C.2a	CEOP1940;CEOP1940
TSPOP368	2	2	2	2	1,7	?	WBGene00008427;WBGene00000796	D2085.2;C14A4.4a	CEOP2376;CEOP2496
TSPOP369	2	1	1	1	4	?	WBGene00008990	F20G4.1	CEOP1432
TSPOP37	2	2	1	1	2	1,NA	WBGene00011776;WBGene00018777	T14G10.7;F53H1.3a	CEOP4356;NA
TSPOP370	2	1	0	0		?	WBGene00009626;WBGene00009626	F42A8.1;F42A8.1	NA;NA
TSPOP371	2	2	1	1	2	1,NA	WBGene00000549;WBGene00001771	R107.6b;T28A11.11	CEOP3572;NA
TSPOP372	3	3	2	2	3,5	?	WBGene00009187;WBGene00016142;WBGene00013043	F27D4.1;C26E6.6;Y49E10.24a	CEOP1989;CEOP3244;NA
TSPOP373	2	2	1	1	2	1,NA	WBGene00017088;WBGene00013852	E01A2.6;ZC101.3	CEOP1892;NA
TSPOP374	2	1	0	0		?	WBGene00016422	C34G6.6c	NA
TSPOP375	2	2	2	1	7	reversed	WBGene00007564;WBGene00007556	C14A4.14;C14A4.3	CEOP2496;CEOP2496
TSPOP376	2	1	0	0		?	WBGene00003928	ZK945.2	NA
TSPOP377	2	2	2	2	4,3	?	WBGene00001486;WBGene00009002	F59G1.7;F21C3.3	CEOP2232;CEOP1384
TSPOP378	2	1	0	0		?	WBGene00022391	Y95B8A.12e	NA
TSPOP379	2	2	2	1	2	identical	WBGene00005025;WBGene00016889	C52E12.3;C52E12.4	CEOP2276;CEOP2276
TSPOP38	2	2	2	2	5,2	?	WBGene00016375;WBGene00014938	C33H5.8;Y62E10A.11	CEOP4252;CEOP4548
TSPOP380	2	1	1	1	2	?	WBGene00008078	C44B9.1	CEOP3813
TSPOP382	2	2	1	1	2	1,NA	WBGene00022453;WBGene00013902	Y110A2AR.3a;ZC455.1a	CEOP2076;NA
TSPOP383	2	2	0	0		?	WBGene00009217;WBGene00007302	F28D1.8;C04F12.8	NA;NA
TSPOP384	2	2	1	1	2	1,NA	WBGene00006833;WBGene00019491	F53F10.4a;K07E3.2	CEOP1116;NA
TSPOP385	2	1	1	1	5	?	WBGene00008458	E02H1.6	CEOP2436
TSPOP386	2	2	1	1	3	1,NA	WBGene00004781;WBGene00013557	T26A5.7a;Y75B8A.24	CEOP3384;NA
TSPOP388	2	1	0	0		?	WBGene00009552	F39B1.1	NA
TSPOP389	2	2	2	2	2,4	?	WBGene00012714;WBGene00006946	Y39E4B.1;C34E10.4b	CEOP3819;CEOP3268
TSPOP39	2	2	1	1	3	1,NA	WBGene00015793;WBGene00001371	C15C7.7;F26H11.5	CEOPX040;NA
TSPOP390	2	2	0	0		?	WBGene00016674;WBGene00011441	C45G9.2;T04F8.2	NA;NA
TSPOP391	2	2	0	0		?	WBGene00000959;WBGene00000817	F46H6.2a;B0547.1	NA;NA
TSPOP392	2	1	0	0		?	WBGene00019627	K10D2.1a	NA
TSPOP393	1	1	1	1	2	?	WBGene00017286	F09E5.8	CEOP2164
TSPOP394	2	2	1	1	2	1,NA	WBGene00000184;WBGene00004298	Y116A8C.12;W06D4.6	CEOP4669;NA
TSPOP395	2	2	1	1	2	1,NA	WBGene00006708;WBGene00021883	Y54G2A.31;Y54G2A.18	CEOP4072;NA
TSPOP396	2	2	2	2	4,4	?	WBGene00016412;WBGene00016390	C34E10.11;C34B2.5	CEOP3268;CEOP1636
TSPOP397	2	2	0	0		?	WBGene00000898;WBGene00018193	Y55D5A.5e;F39C12.1	NA;NA
TSPOP398	2	2	0	0		?	WBGene00005662;WBGene00002804	W03B1.4a;Y110A7A.19	NA;NA
TSPOP399	2	2	2	1	2	reversed	WBGene00012756;WBGene00001235	Y41C4A.9;Y41C4A.10	CEOP3728;CEOP3728
TSPOP4	3	3	2	2	2,3	?	WBGene00007752;WBGene00008364;WBGene00012927	C26H9A.2d;D1046.3;Y47D3A.14	CEOP4654;CEOP4316;NA
TSPOP40	5	5	4	4	3,2,2,4	?	WBGene00004424;WBGene00011941;WBGene00012730;WBGene00011860;WBGene00010033	JC8.3a;T23B5.4a;Y39G8C.1;T20D3.8;F54B11.10	CEOP4535;CEOP4654;CEOP2724;CEOP4328;NA
TSPOP400	2	2	1	1	5	1,NA	WBGene00021758;WBGene00009978	Y50D7A.10;F53E4.1b	CEOP3851;NA
TSPOP401	3	2	2	2	3,3	?	WBGene00006997;WBGene00021208	ZK546.1d;Y18H1A.2a	CEOP2690;CEOP1014
TSPOP402	2	2	0	0		?	WBGene00002228;WBGene00012739	C06G3.2;Y40B1B.7	NA;NA
TSPOP404	1	1	1	1	2	?	WBGene00017286	F09E5.8	CEOP2164
TSPOP406	2	1	1	1	2	?	WBGene00017088	E01A2.6	CEOP1892
TSPOP407	1	1	0	0		?	WBGene00045500	T05E12.9	NA
TSPOP408	2	2	1	1	4	1,NA	WBGene00006946;WBGene00017922	C34E10.4b;F29B9.7	CEOP3268;NA
TSPOP409	2	1	1	1	5	?	WBGene00001823	ZC395.7	CEOP3272
TSPOP41	2	2	1	1	4	1,NA	WBGene00007616;WBGene00007882	C15H11.8;C33A12.3a	CEOP5416;NA
TSPOP410	2	1	0	0		?	WBGene00011280	R74.6	NA
TSPOP411	2	2	1	1	2	1,NA	WBGene00001233;WBGene00011802	T16G1.11;T16G1.9	CEOP5376;NA
TSPOP412	2	1	1	1	4	?	WBGene00017889	F28B3.10	CEOP1208
TSPOP413	2	2	2	2	2,4	?	WBGene00012714;WBGene00006946	Y39E4B.1;C34E10.4b	CEOP3819;CEOP3268
TSPOP414	2	2	2	1	3	reversed	WBGene00008008;WBGene00008006	C38D4.9;C38D4.5b	CEOP3220;CEOP3220
TSPOP415	1	1	0	0		?	WBGene00003412	F20B6.3	NA
TSPOP416	2	2	2	2	4,3	?	WBGene00000838;WBGene00022759	Y108G3AL.1b;ZK546.2b	CEOP5588;CEOP2690
TSPOP417	2	2	1	1	2	1,NA	WBGene00013997;WBGene00235263	ZK550.3;Y66H1A.8b	CEOP4600;NA
TSPOP418	2	2	2	2	3,6	?	WBGene00015353;WBGene00020110	C02F5.13;R151.7b	CEOP3496;CEOP3424
TSPOP42	2	2	2	2	3,3	?	WBGene00019822;WBGene00021515	R02D3.4b;Y41D4B.12a	CEOP4008;CEOP4047
TSPOP43	2	2	2	2	3,6	?	WBGene00013376;WBGene00015238	Y62E10A.6;B0511.13b	CEOP4540;CEOP1632
TSPOP44	2	2	2	2	3,2	?	WBGene00017999;WBGene00016740	F33D4.7;C48B6.2	CEOP4240;CEOP1356
TSPOP45	2	1	1	1	5	?	WBGene00044325	C33H5.19	CEOP4252
TSPOP46	2	2	2	2	2,2	?	WBGene00020215;WBGene00013176	T04G9.4;Y53F4B.39a	CEOPX147;CEOP2660
TSPOP47	4	4	2	2	2,2	?	WBGene00018723;WBGene00000764;WBGene00001808;WBGene00004482	F53A3.7;T03F1.2;T10G3.6a;C16A3.9	CEOP3845;CEOP1124;NA;NA
TSPOP48	2	2	0	0		?	WBGene00013963;WBGene00022173	ZK287.2a;Y71H2AM.8	NA;NA
TSPOP49	2	2	1	1	2	1,NA	WBGene00007588;WBGene00020365	C14C10.5b;T08G2.2	CEOP5574;NA
TSPOP5	2	2	1	1	4	1,NA	WBGene00013462;WBGene00018740	Y67H2A.4d;F53B3.1	CEOP4538;NA
TSPOP50	2	2	1	1	4	1,NA	WBGene00001093;WBGene00015338	T12E12.4b;C02E7.1b	CEOP4168;NA
TSPOP51	2	2	1	1	3	1,NA	WBGene00011122;WBGene00018994	R07H5.2a;F56H1.3	CEOP4424;NA
TSPOP52	2	2	1	1	4	1,NA	WBGene00015091;WBGene00003062	B0261.1;K09H9.6	CEOP1228;NA
TSPOP54	2	2	0	0		?	WBGene00003008;WBGene00022172	Y54G2A.1;Y71H2AM.7	NA;NA
TSPOP55	3	3	2	2	6,5	?	WBGene00044310;WBGene00013678;WBGene00020471	H20J04.9;Y105E8A.20b;T13B5.3	CEOP2124;CEOP1736;NA
TSPOP56	2	2	0	0		?	WBGene00008927;WBGene00020437	F17H10.3b;T12A2.2	NA;NA
TSPOP57	2	2	2	2	4,3	?	WBGene00016392;WBGene00017142	C34B2.7;EEED8.14	CEOP1636;CEOP2180
TSPOP58	2	2	1	1	2	1,NA	WBGene00015159;WBGene00043705	B0361.5b;Y55F3AM.7a	CEOP3833;NA
TSPOP59	2	2	2	1	2	reversed	WBGene00008452;WBGene00004759	E02A10.1;F45D3.5	CEOP5356;CEOP5356
TSPOP6	2	2	2	1	3	reversed	WBGene00008008;WBGene00008006	C38D4.9;C38D4.5a	CEOP3220;CEOP3220
TSPOP60	2	2	0	0		?	WBGene00018547;WBGene00021899	F47C12.2;Y54H5A.1	NA;NA
TSPOP61	2	2	1	1	2	1,NA	WBGene00001366;WBGene00004276	C33D9.1c;K09A9.2	CEOP4610;NA
TSPOP62	2	2	1	1	2	1,NA	WBGene00011687;WBGene00018833	T10C6.5;F54F2.5a	CEOP5452;NA
TSPOP63	2	1	0	0		?	WBGene00006368	C54H2.1a	NA
TSPOP64	2	2	1	1	8	1,NA	WBGene00012996;WBGene00006512	Y48C3A.16;F18E2.2	CEOP2606;NA
TSPOP65	2	1	0	0		?	WBGene00007007	C44C8.6	NA
TSPOP66	2	2	1	1	2	1,NA	WBGene00021313;WBGene00012530	Y32H12A.5;Y32F6A.5b	CEOP3802;NA
TSPOP67	3	3	0	0		?	WBGene00001177;WBGene00009882;WBGene00003423	B0348.4y;F49C12.13;R10E9.1	NA;NA;NA
TSPOP68	4	4	1	1	2	1,NA,NA,NA	WBGene00001590;WBGene00006853;WBGene00008586;WBGene00019898	C45G3.3;C47G2.2;F08G12.2;R05G6.4	CEOP1986;NA;NA;NA
TSPOP69	2	1	1	1	2	?	WBGene00004031	T13F2.3b	CEOP4624
TSPOP7	2	2	0	0		?	WBGene00012978;WBGene00019600	Y48B6A.1;K09H11.3	NA;NA
TSPOP70	2	1	1	1	2	?	WBGene00013144	Y53C12B.2	CEOP2452
TSPOP71	2	2	0	0		?	WBGene00007022;WBGene00012626	ZK970.3;Y38H6C.14	NA;NA
TSPOP72	2	2	2	2	2,2	?	WBGene00044077;WBGene00016194	T18H9.7a;C28H8.3	CEOP5220;CEOP3350
TSPOP73	2	2	1	1	2	1,NA	WBGene00018878;WBGene00012530	F55D10.3;Y32F6A.5b	CEOPX048;NA
TSPOP74	2	2	1	1	4	1,NA	WBGene00006349;WBGene00021416	F39B2.4a;Y38F2AL.2	CEOP1760;NA
TSPOP75	2	1	0	0		?	WBGene00002066	M110.4a	NA
TSPOP76	2	2	0	0		?	WBGene00003813;WBGene00011286	C08B11.4;R90.4	NA;NA
TSPOP77	2	1	0	0		?	WBGene00006452	R148.6	NA
TSPOP78	2	2	2	2	3,4	?	WBGene00013406;WBGene00011634	Y63D3A.7;T09A5.5	CEOP1731;CEOP2312
TSPOP79	3	3	1	1	3	1,NA,NA	WBGene00010408;WBGene00002162;WBGene00004979	H19N07.4a;F42G8.12;F42G8.11	CEOP5272;NA;NA
TSPOP8	2	2	1	1	2	1,NA	WBGene00003389;WBGene00020562	K03H1.2;T19C3.4	CEOP3642;NA
TSPOP80	3	3	0	0		?	WBGene00010812;WBGene00011887;WBGene00007643	M01F1.6;T21B10.5a;C17E4.3	NA;NA;NA
TSPOP81	2	2	1	1	3	1,NA	WBGene00013587;WBGene00004188	Y80D3A.9;W07E6.4	CEOP5476;NA
TSPOP82	2	2	2	2	2,2	?	WBGene00000962;WBGene00000181	T21E12.4b;F01G4.2a	CEOP1994;CEOP4412
TSPOP83	2	1	0	0		?	WBGene00012814	Y43F8B.3b	NA
TSPOP84	2	1	0	0		?	WBGene00018468	F45E4.3e	NA
TSPOP85	2	2	1	1	3	1,NA	WBGene00010044;WBGene00019207	F54C9.9;H17B01.1a	CEOP2368;NA
TSPOP86	2	1	1	1	2	?	WBGene00002497	F52H3.1	CEOP2696
TSPOP87	2	2	1	1	8	1,NA	WBGene00138717;WBGene00003009	F52C12.6a;K10B2.1d	CEOP4052;NA
TSPOP88	2	2	0	0		?	WBGene00013481;WBGene00012665	Y69H2.3e;Y39B6A.2a	NA;NA
TSPOP89	2	2	1	1	2	1,NA	WBGene00004136;WBGene00012666	K11D12.2;Y39B6A.3a	CEOP5564;NA
TSPOP9	2	2	1	1	2	1,NA	WBGene00007668;WBGene00012717	C18B12.6;Y39E4B.6b	CEOPX132;NA
TSPOP90	2	2	1	1	2	1,NA	WBGene00012037;WBGene00004403	T26E3.4;Y116A8C.16f	CEOP1672;NA
TSPOP91	3	2	1	1	3	1,NA	WBGene00018934;WBGene00018932	F56B3.11a;F56B3.8a	CEOP4036;NA
TSPOP93	2	2	0	0		?	WBGene00020556;WBGene00011821	T19B4.1;T18D3.3a	NA;NA
TSPOP94	2	2	1	1	3	1,NA	WBGene00008684;WBGene00003733	F11A10.3a;F57C7.2b	CEOP4490;NA
TSPOP95	2	2	0	0		?	WBGene00003736;WBGene00022475	ZK822.3b;Y119C1B.10b	NA;NA
TSPOP96	2	2	2	2	6,5	?	WBGene00012694;WBGene00021752	Y39B6A.36;Y50D7A.2	CEOP5480;CEOP3851
TSPOP97	2	2	1	1	2	1,NA	WBGene00010042;WBGene00015508	F54C9.6;C06A6.3	CEOP2364;NA
TSPOP98	2	2	1	1	2	1,NA	WBGene00021956;WBGene00016442	Y57E12AL.1a;C35D10.5	CEOP5534;NA
TSPOP99	2	2	2	1	4	identical	WBGene00000818;WBGene00013464	Y67H2A.6b;Y67H2A.7a	CEOP4538;CEOP4538

[truncated: 12 more sheets: DA10c, DA10u, DA8c, DA8u, RE10c, RE10u, RE8c, RE8u, ST10c, ST10u, ST8c, ST8u]
