# Supplementary material
Source: HighWire-hosted journal article supplement (doi:10.1101/rna.076414.120)
Supplement: Supplemental_Table_S7.xlsx [file Supplemental_Table_S7.xlsx]

## Sheet: Legend
Supplementary Table S7. Identification of operonic germline genes in T. spiralis via orthology to C. elegans. The Wormbase IDs of 4,235 C. elegans germline genes are presented alongside genomic information from ParaSite BioMart. T. spiralis orthologues were obtained via TBLASTN and numbers of orthologues intersecting T. spiralis operonic genes as predicted from our 20 datasets are presented with …

## Sheet: Cel germline genes
WormbaseID
C05B5.2
F37A8.2
F40F12.3
F54A3.4
F58D5.8
K03H1.1
M70.3b
T05A7.6
T16G12.7
T23F6.3
T25C8.3
Y116A8A.6
Y23H5B.9
Y39G10AR.16
Y43F8C.5
Y46C8AL.1
Y46G5A.30
Y47D3A.22
Y50E8A.12
Y50E8A.2
Y51A2B.6a
Y52D5A.2
Y59E9AL.6
Y59E9AR.7
Y65B4A.9
Y71G12B.27
Y73B6A.1
Y73F8A.12
Y73F8A.14
C40H5.1
H12D21.1
W06A7.5
ZC412.6
ZC412.7
C25A8.1
C33F10.10
F21D9.3
W01B6.4
F36H12.13
K07F5.5
ZK484.8
C24D10.7
C24D10.8
F11G11.8
T23B7.1
C47A4.5
Y45F10B.3
C32E8.4
F09C12.7
ZK1248.4
ZK84.5
K05F1.8
ZK1248.17
F32B5.4
ZK484.5
C03B8.1
F46F5.9
ZC168.6
ZK1225.6
C35D10.11
C55C2.2
E03H12.10
F44D12.7
T27A3.3
T28H11.6
F02C9.1
C02F5.2
F36H12.4
E03A3.4
C04G2.4
C09B9.6
C33F10.9
C34F11.4
C34F11.6
F26G1.7
F32B6.6
F36H12.7
F58A6.8
K05F1.2
K05F1.7
K07F5.2
K07F5.3
R05F9.13
R05F9.8
R13H9.2
R13H9.4
T13F2.10
T13F2.11
ZK1248.6
ZK1251.6
ZK354.1
ZK354.11
ZK354.4
ZK354.5
ZK546.6
F08H9.2
C27D6.3
F35H8.4
W02D9.5
Y106G6H.13
Y37D8A.8
F35H8.1
Y67A6A.1
C18A3.7
C34D4.3
ZC412.9
C34F11.2
K03H1.12
C34G6.3
K07F5.7
F36A4.3
Y46G5A.14
K01D12.15
ZC116.2
T14D7.3
Y51B9A.5
R05D3.5
ZC262.1
C09F9.1
F29D10.1
F36A2.10
C48E7.7
T08B2.12
ZK1251.1
C25D7.1
C24D10.2
ZK617.3
F42E8.2
F52F12.5
F11G11.4
F36A4.2
F08G2.6
Y116A8A.7
T22B3.3
Y73F8A.15
C07G1.6
F36A4.4
H09I01.1
R05F9.3
T13A10.1
W09D6.4
ZK1307.3
F44G4.5
C15A11.2
D2062.4
ZK930.7
F47B8.11
C38C3.8
T15H9.5
C27F2.6
F46A8.9
T13F2.12
F32B6.7
K06A5.3
F36D1.4
T14G10.8
ZK353.3
T01H3.5
C02F5.5
Y49E10.7
C26E6.1
C05C12.5
C10G11.9
T27A3.4
F37A8.1
C26C6.6
C18H7.7
F17E9.5
F26F4.2
K01D12.7
F43E2.10
Y106G6A.4
F36H12.5
F41G3.4
C25A8.2
ZK1307.4
F02C9.4
F10D11.3
F46B3.4
Y106G6E.2
F58F12.2
C33A12.15
B0432.12
E03H12.5
B0432.11
T23B3.5
F29B9.7
T20F5.5
Y38F1A.7
C41G7.6
C01G12.3
W09C3.7
E03H12.7
F28H7.4
ZK930.4
C26B2.2
ZK945.6
K08F4.5
F56F4.7
ZK1251.3
C10H11.7
B0496.6
F33D11.1
T02E1.6
T10E9.6
Y43C5B.2
Y47G6A.3
ZC477.7
R02D5.7
F49E12.4
ZC477.1
ZK546.3
B0379.2
ZK637.12
F42A9.3
F32B4.2
R13H9.1
B0041.1
T28H11.7
Y106G6E.3
F27C1.1
F47B3.2
F46A9.1
R01H2.4
R07E5.15
T21G5.4
ZK783.3
C25G4.6
T13F2.9
C06A5.2
F32B6.5
Y38F1A.1
ZK354.7
Y45F10B.8
ZK637.15
ZK520.5
F07D3.3
C04F12.7
C55B7.10
K07F5.11
B0273.1
C04G2.5
F41G3.5
F28E10.4
F54C8.1
Y57A10B.7
C17F3.3
C29F5.3
C54G4.3
Y116A8C.37
C16A11.7
T06E4.5
F49F1.12
AH6.3
K05F1.9
F58E6.5
B0491.3
T02H6.4
F36D3.4
K07F5.8
C47E8.1
K01H12.2
T03F1.5
C17D12.5
H12D21.2
T23F11.2
R09E10.6
W03C9.1
C35D10.3
T01B11.4
F54C1.8
ZK795.2
F47B3.5
F40F9.3
K11H3.2
W09C3.6
ZC317.6
W03F11.3
T08G11.2
F59C6.2
F11G11.9
F20D6.6
F55C5.2
F21H7.5
T27E7.1
F21F3.3
W01C9.4
F38H4.6
C45G9.9
F54D1.1
C45G9.4
T08H10.4
C04G2.9
C09H5.7
C43G2.3
T05C12.1
Y1A5A.1
ZK546.7
C47E12.10
W06D4.2
F56H11.3
C08F11.10
ZK1248.5
K07A12.5
C35E7.9
F47B3.4
F36H12.8
R13H9.5
Y59E9AL.1
Y43F8C.9
ZK354.3
F44D12.4
Y81G3A.1
C35D10.2
K06A5.2
R102.3
R10E4.7
C50D2.3
C25D7.12
C01G10.14
T16A9.3
F38A5.6
F55D12.6
C17C3.11
C14C10.1
K07A1.4
C28D4.7
C28D4.8
Y69E1A.2
F53B6.7
ZK938.1
C34D4.2
F52H3.6
T28H11.1
F46A9.2
C17H12.3
C47A4.3
C33H5.16
D1081.5
W02A2.8
ZC412.5
F36H12.9
R13H9.6
ZK858.2
F13G11.2
C06A8.6
F26A3.5
AH6.2
R10E9.2
ZK512.8
T05C12.3
F36H12.3
C33F10.12
F40H6.1
T05F1.8
F42G4.6
F44F4.10
B0511.4
Y69E1A.4
Y106G6G.1
C02B10.6
F36H12.10
T16A9.5
T27A3.5
F53B6.4
C47E12.11
Y53F4B.36
F22B5.5
K02F6.2
C15H7.3
ZK84.2
Y69E1A.8
F28A10.1
F36A2.11
F18C5.4
T28H11.5
F53C3.1
F17A9.1
F10G8.1
C55B7.3
T04B2.2
C39H7.1
B0261.6
C56A3.8
F35C11.3
M05D6.1
Y38H8A.3
ZK265.3
F36H12.14
T28C6.5
ZK673.6
W03D8.10
ZK484.7
C09H10.9
R08C7.8
D2045.5
K08D10.7
B0379.7
F02E9.3
C52E4.7
B0218.7
K06H7.8
C27D8.1
C30B5.3
F58A6.5
C38C10.3
ZK930.6
K11C4.1
F44D12.6
K08C9.2
M02B1.4
F23B12.1
C15H7.4
T23B3.3
Y6E2A.9
Y106G6G.4
Y69E1A.1
M05B5.1
C29E6.3
ZK1098.6
F32H2.7
T25B9.2
C08F8.6
Y37D8A.5
T20H4.2
F48C1.7
ZK354.6
F23B2.7
C43E11.5
C50F2.5
F42C5.5
M05B5.3
C49C3.2
F47B3.1
C25A6.1
C56C10.6
ZK507.1
W09C3.8
C30A5.4
F57B9.8
C14C11.1
K08C9.1
M176.9
T01C3.5
K05F1.3
F56F3.4
K01H12.4
T28C12.3
T09B4.7
T08B2.11
C46E10.1
F13A7.1
R09E10.1
C04G2.2
T05F1.5
Y38H8A.4
F58H1.6
T09F5.10
F21F3.2
C36B1.10
C17H12.5
ZK622.1
C36H8.1
W01B6.2
T13A10.11
F26B1.5
C09B9.4
Y18D10A.21
F38A5.11
C15C6.2a
C18G1.9
F08G5.2
C32D5.4
ZK354.2
C06A1.3
C05C12.1
C09B9.2
F22D6.9
C24H11.1
F40G12.10
Y44A6D.5
T02B11.2
K08F8.5a
C33F10.8
R09E10.4
W01B6.6
H06H21.9
W02A2.4
Y45F10B.2
C31H1.5
BE10.1
F32A11.3
F54H5.2
F47B3.7
ZK550.5
R148.7
R10D12.10
C25G4.4
ZC581.7
C50F7.3
Y43C5B.3
T02E1.7
F14H3.2
F56A11.6
F56D5.2
C47D12.3
C55C3.4
F25H5.7
B0523.1
F49E11.7
C53A5.4
T28F4.3
B0252.5
M7.7
F21D9.2
W08D2.8
F44D12.8
C15H11.1
C25A8.5
D2024.1
ZC513.10
K08D10.8
ZK593.9
C27D8.2
R01H2.2
Y69A2AR.6
F26A1.3
C32C4.3
F57A8.6
T13H10.1
T09A12.1
F45E4.6
F57F4.1
F37H8.4
C24D10.1
C14A4.13
H08M01.1
C18E9.8
Y116A8C.24
Y116A8C.38
T04A8.3
C34B2.3
C09D4.3
Y106G6D.3
C43F9.6
ZK418.2
ZK354.8
C07E3.4
T06C10.6
W04E12.4
T15B12.2
Y37E11B.10
F56D6.5
F57H12.5
M05D6.3
F35C11.2
F55F8.7
F26F4.8
R11E3.1
ZK1290.6
F53B2.5
Y40H4A.2
ZK1225.4
ZK1127.2
F33D11.2
AH10.1
Y4C6A.1
F36A2.12
K09E4.1
T25B9.5
F10F2.8
C32E12.1
Y69E1A.3
T06C10.3
C01F6.2
F58A6.11
C48B6.4
C49C8.1
R05D7.2
ZK1225.5
F58G1.3
F42G8.9
F47B3.6
C05D2.3
F42G4.2
M162.7
W02B12.12
Y57G7A.5
R10H10.2
C46H11.6
C09G9.4
F47C12.4
C08F8.4
ZC581.2
W01B6.5
T11F8.4
Y57G11A.2
F59B2.5
M04G7.2
F25F2.1
T25B9.6
Y32F6A.2
F47D12.7
F02E11.1
R08C7.5
T08B6.4
ZC513.3
Y70C5C.5
F46A8.10
T21G5.1
C44B9.2
Y53F4B.11
C04E6.5
F27C8.5
C50F4.2
Y57G11B.3
R05H5.2
F10F2.7
K08A2.2
F23C8.7
C18H7.4
K09B11.5
ZC581.6
F27E5.3
F21H7.2
F53G12.6
C01G5.3
F19B6.4
T08G3.4
R09E10.3
F23C8.8
F01G10.5
R13G10.4
F59A3.8
F36H1.3
T26A5.1
C38C3.7
C55C3.3
C53B4.2
K09C6.8
T04F3.3
F49C12.15
F36D3.8
F42G8.8
C46A5.1
T06D4.4
C31H1.1
C17H12.12
C38C3.3
Y73F8A.20
F26B1.1
K09C6.7
R03D7.8
C34F11.5
F18A12.4
F58D2.2
Y49E10.10
F55H12.1
F55A11.6
F07E5.8
F55H12.2
Y57G7A.6
F44F1.3
B0393.4
ZK250.6
M28.9
T22B3.2a
T04A6.3
D1037.5
K08E4.5
K02F6.3
T10E9.4
F32H2.9
R07C3.4
M01A12.1
T22H9.3
C01G10.1
C01G12.8
F09C12.2
T08B6.5
F26D2.10
W03B1.9
F35E2.6
K02E11.1
Y116F11B.7
H05L14.1
Y43F8A.2
Y69A2AR.19
F17C8.3
R102.7
Y39B6A.30
T04A8.13
F54H12.5
C28A5.6
R13A1.3
Y113G7C.1
M70.1
F37A4.7a
C24F3.5
Y53C10A.10
F34D10.2
F47G6.4
Y59E9AL.3
ZK1128.2a
F56A4.9
Y116A8A.2
Y38E10A.17
Y38F2AR.10
Y39H10A.7
Y55B1AR.4
Y75B8A.23
Y32B12A.4
ZC155.2
W02D3.6
F09E8.1
Y50E8A.10
K02A11.2
B0457.4
F54H5.3
F20D6.1
ZK809.1
C41D11.2
Y37E11B.9
F17C8.5
Y52B11A.1
T08H10.3
C35A5.4
T21C12.4
C03C10.2
AC3.4
C06C6.6
T25D10.1
Y49E10.17
C56G2.4
C06C6.9
F36G9.15
F44G3.7
H24O09.2
Y106G6E.1
Y46G5A.22a
Y47D3A.14
Y65B4A.7
F55C12.2
F26A1.10
ZK262.4
W03B1.1
F21F8.5
Y69A2AR.8
C03B8.3
Y106G6G.3
Y57G7A.3
F35H10.2
Y44A6B.4
M70.2
H38K22.4
Y39A1A.18
T05C12.9
F46C5.7
F42A9.4
B0207.9
Y39E4A.1
W01B6.8
F26F12.2
C33C12.4
Y76A2A.1
B0496.1
F25H5.2
C25D7.2
C34B2.4
F10G8.2
B0334.10
C28C12.11
C50E10.1
F56F4.2
W03D8.3
C28C12.1
C45G9.1
F59A3.7
M03E7.3
C10G11.10
M88.3
Y51B9A.3
F01D4.3
F36D4.1
R13F6.5
F13E9.5
Y38H6C.15
C48E7.9
R05D3.3
F44D12.11
F15H9.1
R13A5.11
F13A7.7
F59C6.6
Y57G11C.14
ZC477.2
C06E1.7
C24H11.2
F59G1.2
Y38H8A.2
F14E5.4
T08B1.5
Y51A2B.4
T25B9.4
Y75B7B.1
Y59E9AR.2
F58F12.3
K10C9.7
F10F2.6
F43G6.6
F48A9.3
H23L24.2
F13D12.9
Y6B3B.7
C54G4.2
C27B7.6
C01B12.4
ZK688.7
W03D8.1
Y18H1A.1
K12B6.2
H12D21.5
Y116A8C.33
F36G9.13
C06C6.7
W03B1.5
Y45F3A.1
F22D6.1
ZK1053.6
F59C6.3
Y116A8C.4
T05E8.1
F14E5.3
ZK418.6
T04B2.4
M28.2
Y113G7A.10
Y57G11C.23
Y71G12B.2
F14H3.6
H11L12.1
T04A8.6
Y48G1BL.3
Y62E10A.14
M28.5
F58A4.9
C34B2.2
Y48A6B.3
C35D10.13
C28C12.2
T19H12.2
B0304.2
B0414.3
ZK265.6
F59A2.3
T05B9.1
F46F11.2
F10G7.3
C18G1.5
M01E11.5
F57B10.12
Y17G7A.1
F23B2.6
ZK381.1
T25E12.5
F58A4.3
Y39A1A.14
F57C2.1
C50B8.2
C55B7.11
F44E2.8
Y23H5A.3
Y75B12B.1
K03H4.2
C27C7.1
T24D1.3
H02I12.5
T05G5.3
K10B2.3
Y18D10A.11
F41H10.10
Y102A5C.1
ZC404.8
F26D10.10
C28D4.3
C27B7.5
W02F12.3
R06F6.1
F44B9.7
T06E6.2a
F31E3.3
T19B10.6
T07G12.6
EEED8.1
C08F8.3
C09G9.6
C39E9.12
K01G5.5
C15H11.6
C07H6.5
C13G5.2
F56C9.6
B0393.6
K07A1.1
F56C9.3
C25A1.9
F57B1.2
Y45F10A.2
C27H6.2
AH6.5
T23G11.3
F54C9.6
F38E1.7
C26E6.5
W02A2.7
F26B1.3
F28C6.3
C50B6.2
C07G2.1
F44F4.2
F58A4.4
F54D5.9
T05F1.2
M01E11.6
C36B1.3
T16G12.3
K06A5.7
JC8.6a
T22D1.10
F55G1.8
C38D4.4
F52F12.4
C14B1.9
B0393.3
F32D1.10
C14B9.4a
F30F8.1
Y65B4BL.2
Y111B2A.3
R12E2.10
T21E3.1
T07C4.3a
B0035.6
B0414.5
C05D2.5
C16A11.6
D1081.7
H26D21.2
B0273.2
F18A11.1
F11E6.7
C06A1.4
F58G1.1
C16C10.3
R119.7
C41G7.3
W02D9.1
Y32F6A.1
T25G3.2
T28D9.2a
C07A9.6a
F20B4.2
T16H12.6
T19E10.1a
T28F3.3
Y110A7A.18
Y34D9A.4
Y47G6A.24
Y47G6A.25
Y50E8A.9
Y51H7C.9
Y53F4A.2
Y62E10A.3
Y69A2AR.23
Y69A2AR.24
Y71F9B.7
Y97E10AR.4
Y43C5A.1
T11G6.7
C17C3.5
T28D9.9
R09B3.2
F52B5.6
F43D9.4
R09B3.3
D2089.2
C03D6.6
F58A4.2
R148.4
W08E3.4
C50H2.7
T22F3.4
T05G5.10
F39H2.4
F46A9.4
Y37E11AL.4
F52C6.2
ZK858.3
F15H10.3
B0244.9
Y110A2AR.1
C27A2.3
F53A2.6
Y23H5B.2
C48B4.10
F55H2.3
C29A12.1
M03E7.5
K07H8.9
F36D1.6
Y75B12A.1
T01C3.9
W03A5.5
F52C6.11
Y43E12A.1
F07A5.2
T10B5.6
C03C11.2
F35G12.10
B0218.5
K01G5.3
ZK1248.7
T06C12.4
F08G5.1
W03D2.4
C01G8.6
C25G4.7
C40H1.1
Y14H12B.2
T24A6.1
F13D12.5
T24C4.1
T21B10.4
C03D6.5
C06A8.5
C10G11.8
ZC168.3
F22B7.13
M7.2
C38C10.4
K07C11.2
T27D1.1
F20A1.9
W03G9.2
F22B3.8
F54C9.8
F37E3.3
6R55.2
ZK177.6
F42A9.6
B0273.3
T02G5.12
Y39A1A.11
B0238.9
C04E6.4
F21H12.5
F58G11.3
K07C5.4
Y53C12A.1
C18G1.4a
C06A5.6
W05F2.6
F57C9.5
K10C8.1
Y48G1BL.1
C50C3.1
C18E3.6
R07B7.2
T11F8.3
M01F1.8
C25A1.3
R06C7.1
C14B1.7
W03C9.7
W06H3.1
F23B12.8
C44E4.3
K10B2.5
C46A5.6
F55A12.1
B0025.2
T06E4.1
F33E11.3
F52B5.5
C16A11.3
ZK1055.1
F26D2.2
F10C5.1
F14D2.4
C18E3.5
W05F2.2a
Y57A10A.30a
B0348.6a
C07E3.1a
C09D4.4a
C13G3.3a
C17E7.9a
C26E6.9a
C37A2.8a
C38D4.1a
C47B2.2a
C53D5.6
C56C10.7a
D1014.8
E01A2.4
F01F1.7a
F07A5.1a
F10G7.8
F10G7.9
F12E12.7
F14H3.3
F14H3.5
F14H3.9
F29G9.7
F30H5.2
F41H10.6a
F45E4.10a
F46B6.3a
F57F4.3
F57F4.4
H06H21.7a
H12C20.2a
K07B1.7a
K08D12.1
T02G5.9a
T07A9.5a
T10C6.7
T10C6.8
T28F3.1
W03F9.2a
Y110A7A.13
Y110A7A.17
Y110A7A.19
Y111B2A.1
Y18H1A.7
Y32H12A.2
Y38B5A.1
Y38E10A.14
Y38E10A.5
Y39A3CR.8
Y39B6A.16
Y39B6A.3
Y41D4B.19a
Y43H11AL.3
Y46G5A.6
Y47G6A.12
Y48C3A.7
Y48G10A.4
Y48G1A.6
Y48G1BL.4
Y48G9A.11
Y49F6B.9
Y4C6A.3
Y50E8A.6
Y51B11A.1
Y53F4B.10
Y54E10A.12
Y54E10A.15
Y54E10BR.6
Y55B1AR.1
Y55D5A.5
Y55D9A.1a
Y55D9A.2a
Y55F3AM.12
Y57A10A.9
Y57E12AL.6
Y61A9LA.10
Y61A9LA.8
Y62E10A.17
Y62E10A.5
Y71F9B.6
Y73B6A.4
ZK484.4a
ZK688.9
F30F8.7
R09H3.2
C25A1.6
T24A6.17
F08B4.3
F10E9.5
F23F12.2
T07F10.5
C04C3.4
C29F9.12
Y54G11A.11
F27C1.12
C04G6.6
W02D9.9
B0464.9
B0391.10
K03B8.4
C46H11.1
ZC404.2
K03H1.7
F23B2.13
T27A8.4
VB0393L.2
T08B2.4
C06A1.5
T24H7.4
Y105E8A.15
ZK652.1
T02G5.6
F59H6.7
Y39A3CL.3
K10D2.5
ZK637.2
W05B10.1
T08D2.4
C15H11.8
W01G7.3
F15A4.10
H06H21.6
T07G12.8
F31E3.6
T08B2.8
C29F9.9
F59A2.5
F55F8.6
C07A9.2
F17H10.4
C12D8.4
F54D10.1
F48G7.9
W04C9.4
D1007.4
ZK287.5
M01E10.3
K02B2.6
ZK593.7
C52D10.7
Y106G6H.16
Y47D7A.1
ZK177.10
T26E3.5
C08B11.9
C30C11.1
W06D11.3
C01B12.8
K03H9.1
ZK970.3
F40F8.1
T22C1.5
K07E8.8
K02B12.2
F32H2.2
T02H6.7
E03H12.8
C52B11.4
K08D12.3a
R05D3.8
C56C10.8
R01H2.6
Y65B4BR.5
E02H1.6
F58A4.10
C41G6.12
F32A5.7
C29A12.2
F58B3.9
Y75B8A.17
T12G3.5
C36B1.7
Y54E5A.5
C48B6.2
T01C3.3
Y43F4B.3
C49C3.6
R05D11.9
C02F4.5
Y38A8.2
C24D10.6
ZK632.8
ZK678.3
C16C10.4
C50F4.4
C14A6.7
Y48E1B.11
C35D10.8
F57B10.11
T10C6.5
3R5.1
ZK742.5
C16C8.11
W06E11.2
C44B7.1
F43G9.9
F43G9.2
C02B8.1
T20F5.2
C47A4.1
Y102A5C.2
F26H11.1
F13A2.4
C24D10.5
T12D8.2
T24A6.2
B0334.4
F29A7.6
H04D03.1
C16C8.14
F22B5.1
Y49F6C.8
C24D10.4
F59A7.4
W05H7.2
Y54E10BR.2
K08E4.6
R10H10.1
C08F11.7
H06I04.4a
F43G6.10
T06E4.11
T13F2.8
D2007.4
PAR2.1
C15H11.7
F54D5.5
F52C6.1
F39H2.1
T01B7.3
Y6G8.3
F42A6.6
ZK856.11
C02F5.9
D1007.8
B0281.5
B0416.4
T11F8.1
B0047.3
F30F8.3
T05H10.2
C47B2.4
Y54E2A.3
F23C8.9
R04D3.4
C48B6.3
T23B12.1
C25D7.8
F23F1.1
C16C8.13
C35E7.8
C32H11.7
K03B4.3a
R03H4.4
T05C12.5
F21E9.6
F39H11.5
F54C8.2
C50E3.10
T23B12.7
CD4.7
C14B1.8
C33H5.8
K08H2.3
C35D10.10
F46F6.3
W02A11.8
F25H2.4
F53B7.3
Y57A10A.3
M04F3.1
F40E3.2
ZK20.5
F26H9.4
F59H6.8
K02F3.11
F45C12.12
D1081.6
CD4.6
C14A4.1
ZK809.2
T13H5.5
R10A10.2
F45E4.2
Y17G9B.4
F35E12.3
T19B10.11
ZK1058.5
F56C9.9
B0495.9
F56A8.5
M02B7.1
T12G3.6
Y51H7BR.2
F55G1.9
T14B4.3a
K07G5.2
F32D1.7
F55G1.5
B0491.7
T28D9.1
F08B6.1
F39F10.3
T06D8.6
VW02B12L.3
C24F3.2
R07G3.5
T12F5.1
R09F10.8
C16A3.6
F45B8.2
C30A5.3
F40B1.1
C30B5.4
F52D2.2
R05G6.4
ZK353.7
F46F5.4
F52C6.10
T19C4.2
B0238.11
W04A8.5
C54G4.6
F59H6.9
T27A8.2
F45C12.7
B0035.1a
C15H11.9
C49F5.3
Y113G7B.7
H26D21.1
F17A2.13
F07C4.3
T27A1.7
C13A2.4
T28A11.8
C25F9.8
R09E12.3
F45G2.9
ZK418.8
C26B2.6
Y53C10A.13
F46B6.11
R02D3.8
F14D2.1
F56E10.1
F56G4.2
F56G4.3
T08D2.5
T20D3.8
C36B1.4
Y38H6C.21
C45G9.2
C39E9.13
Y113G7B.4
F43D9.5
C01G10.8
C14A4.11
C18E9.6
C16C4.10
F28F8.6
W05G11.2
T26A8.3
ZK1248.12
ZK1248.13
F13G3.6
R10D12.14
Y113G7B.5
ZK795.3
C56C10.9
F57G4.3
F36G9.2
ZK1248.9
T19H5.2
Y18D10A.20
C18E3.9
F26A1.1
F55G1.6
C33H5.7
C16A3.4
F07H5.10
T09A5.9
Y110A7A.11
C50H11.7
F31B9.3
F26F4.1
K06B4.9
C33H5.15
ZK39.2
Y45F10A.7
R10D12.13a
R11A5.2
R05H10.2
M18.7
C31G12.1
W03A3.3
C06A5.8
T06G6.1
Y18D10A.18
VH15N14R.1
ZC168.4
Y45F10B.5
F13E9.1
T23B12.10
B0513.2a
VF36H2L.1
DC2.4
Y53C10A.1
C56A3.5
T06C12.5
T28A11.9
F49C12.8
F36H12.2
ZK430.3
C29F7.4
T23B12.3
Y45F10B.11
F32D1.4
F08G12.10
K02F2.4
T27A3.7
R04D3.6
F32E10.6
F33H1.3
C08B11.5
Y43F11A.6
T06E6.9
F18C5.8
W08E12.7
F10E9.3
F23F12.6
F47C12.10
C02E7.11
F27D4.2
F39B2.5
C40H5.6
T10E9.1
F31D4.3
ZK20.3
M18.6
Y48A6B.5
K04C1.5
C08B11.7
ZK1307.9
B0511.7
K06H6.2
B0207.6
C34D4.10
F54C1.2
T22D1.5
C32B5.2
T04D3.1
H20J04.5
C26E6.6
C29F5.5
T19C4.3
T04D3.5
F15A4.2
B0547.1
F35G12.2
K12H4.3
B0491.1
ZK1098.5
F23F1.5
F45F2.11
C50C3.8
B0205.3
F57C9.7
T24B8.2
B0511.10
C01G5.6
ZK829.5
T27E9.3
K04F10.3
C26B2.1
ZK1127.9a
C24G6.8
F26F4.6
Y49C4A.3
F43H9.3
C42C1.15
B0024.13
ZK1010.2
H20J04.8
F56H1.4
Y69H2.8
K06H6.1
C10H11.10
T25G3.1
B0280.10
C36C5.1
C41G6.11
F21F3.4
Y102A5C.3
F35G12.5
F40G9.14
F29G9.5
K09H9.7
F57B10.8
ZK418.4
C50F7.4
T05A6.2
C41G7.4
T05H10.4
R09B3.1
F23C8.4
T23B12.2
Y64G10A.2
C33H5.17
F38E1.6
T05E11.4
M01E5.4
B0207.7
R08D7.1
T28B4.2
K08F11.4a
F52E1.10
M116.2
M116.4
W02A2.3
JC8.11
C06A5.9
ZK353.8
F29A7.1
B0035.11
B0213.8
C36C9.3
R10E4.5
C52E12.3
Y48G1C.1
Y116A8A.4
H14N18.2
F20E11.1
F19B6.2a
F43G9.10
C01G6.3
F54D5.2
M05D6.2
F56A8.4
C30C11.2
W02B12.3
ZK1248.15
C52E4.4
B0464.8
C02F5.6
F25H2.8
M18.8
F58B3.7
K04F10.6
F43G9.4
T10H9.3
W06E11.4
W01B11.3
F18A11.6
ZC308.3
C14C6.8
F23B12.6
Y45F10D.9
K05C4.4
T20H4.4
F33G12.2
F08F3.6
R12B2.4
F59A3.4
F37C12.13a
T21B10.7
W01G7.4
T10B5.3
Y53C12A.4
H21P03.2
C34D4.8
JC8.5
F15B9.4
B0432.10
C06G3.12
F13C5.3
T13H5.4
D2096.1
F53B2.1
R13A5.12
C24B9.12
T23D5.1
W03G9.6
F56D2.2
F59A1.9
T01G5.7
Y37D8A.12a
R12E2.3
K04G2.2
F37B4.6
Y6E2A.6
K01C8.10
R74.6
F29B9.1
W03G9.3
T14G10.7
C49H3.9
F25H2.12
Y56A3A.17a
T28A8.5
Y4C6B.1
F46F11.7
T10C6.10
M03C11.4
F26B1.6
D2023.6
B0334.11
Y49F6B.2
T07F10.3
F56A8.6
Y57A10A.19
F22D6.3
Y45G12C.14
Y102A5C.33
F42H10.7
D2096.4
C29F5.2
C06E7.1a
T24G10.2
C05E4.11
ZK550.4
ZK1128.5
K01G5.1
K01C8.5
F35G12.12
C34G6.5
ZK20.4
F26H9.1
C31G12.4
C16A11.4
B0024.10
F44A2.1a
K04D7.2a
Y54G9A.5
C04F5.8
F18A1.2
Y56A3A.22
F40D4.7
ZC395.6
F55B12.4
K08F11.6
F52B5.2
Y102A5C.4
F59A1.7
C47B2.1
F59B1.4
W02D9.3
C28A5.3
C25H3.4
T26G10.1
D2096.7
R11A8.1
T27C10.3
T20F5.7
F56D12.5a
C56C10.1
R04F11.3
T26A5.4
Y57A10A.5
T20H4.3
C43E11.2
K08D10.3
T26A8.4
R05D11.4
C05C8.5
F10G7.4
R05D11.6
C27H6.3
ZC317.7
C05C8.6
C14C11.2
R07G3.7
R03D7.2
F33G12.4
F16A11.2
K07C5.6
K02B9.1
C05D9.8
C23G10.4a
C33H5.14
C29H12.1
W01B6.9
Y54E2A.12
F13A2.6
F01F1.5
M04B2.2
K02F3.12
F25B5.5
C34B2.7
T21H8.3
F53F4.11
F26D10.3
ZK856.12
F55A11.4
T01G9.4
Y47H9C.8
C47E8.5
C33F10.4
Y43C5A.6
ZK430.7
T24D1.2
Y71F9AL.8
C43E11.1
C23H3.5
C50F4.11
W07G1.2
Y24D9A.2
Y55H10B.1
T07E3.5
Y57A10A.2
R06C7.7
R11G11.8
Y57A10A.6
F02E9.6
H34C03.1
Y46H3C.4
F29B9.4
R05F9.11
F10B5.2
T26A5.6
ZK546.5
C16C10.1
K09H11.2
F28C1.1
F08H9.1
K08E3.6
ZK328.4
R166.4
R11D1.7
B0205.9
C17E7.5
Y39G10AR.8
Y113G7B.24
C39E9.11
B0414.6
C03D6.3
C06G3.10
T19B10.8
F58A4.8
T24F1.2
K08F9.2
C30G12.3
M18.3
ZK858.5
F37C12.7
Y39G10AR.10
F37D6.2a
F42H11.2
C56C10.11
T04A8.15
E01A2.2
ZK84.1
T21G5.3
F55A11.7
F22D6.6
K10B2.1
T08G11.4
W02A11.1
F31D4.1
B0495.2
M03D4.1b
C30C11.4
C35D10.9
T16A9.1
C41C4.8
K07H8.10
C01G5.2
F52H3.4
F26D11.1
C25A1.4
F20H11.1
T10E9.2
K04G2.10
W03C9.2
F25B5.2
T12E12.3
ZK177.4
K06A5.1
F55A3.7
C47D12.2
C10B5.1
C29H12.5
F02E9.7
F20D12.4
F22F4.2
T23B12.4
F59A2.4
T13F2.7
C44B7.2a
DC2.1
C13B4.2
D2030.6
F55F8.9
T02E1.2
R06A4.2
K01G5.9
F07A11.3
VC5.4
F40H7.4
ZC155.3
D2089.1a
T10B5.5
F56F4.3
Y53C12B.1
C16A11.5
C54G10.2
F32A5.1
K06H7.6
Y75B12B.7
K02B9.2
F32H2.3
F46B6.5
F48E8.6
K06B9.4
C18H2.2
T03F1.9
F48E8.2
C16C4.7
Y48B6A.1
ZK353.1a
K04F1.13
C01G6.6a
F18A12.7
T15B7.14
C03E10.4
C06A1.1
T20H9.6
C46A5.9
F10G8.3
C05D2.10a
C25A1.10
C36B1.12
Y53C12B.3a
C32D5.11
ZK177.1
T02E1.3a
R06C7.8
B0205.1
Y75B8A.31
F10G7.1
T01B7.5
F33E11.2
C33E10.6
T22D1.9
T12E12.2
F48A11.5
C02F5.1
C06G4.1
C07A9.7
F12F6.1
ZK1248.10
F13H8.2
R02F2.7
K08F11.3
M01E11.3
D2030.8
H05C05.2
C07H6.4
F45E12.3
C23G10.8
C34C12.2
M01A10.1
W06E11.1
C34E10.4
T08D2.3
C01G5.8
F19F10.9
F59H6.1
F55A12.5
C01H6.9
C01F1.1
R07E5.1
W07E6.2
K10G4.1
F09G2.4
F10C2.4
F57B10.6
F55F8.3
C16A3.7
C50F2.3
Y74C10AR.1
T07C12.3
Y48A6B.10
Y54E10A.3
C34E10.5
F57C9.4a
F10E7.8
F30F8.8
K09H11.3
F43G9.12
F54D5.14
F18E2.3
T27F6.5
M03C11.7
Y52D5A.1
F23F1.8
ZC404.9
C53D6.4
C25H3.6a
F27B3.5
Y38A8.3
F18A12.1
C27F2.7
R13F6.10
F18A1.4a
T12F5.3
K02F6.7
F35A5.1
[truncated: 2,236 more rows]

## Sheet: ParaSite BioMart
Genome project	Gene stable ID	Chromosome/scaffold name	Gene start (bp)	Gene end (bp)	Strand	Trichinella spiralis (PRJNA12603) gene stable ID	Trichinella spiralis (PRJNA12603) gene name	Trichinella spiralis (PRJNA12603) start (bp)	Trichinella spiralis (PRJNA12603) chromosome/scaffold	Trichinella spiralis (PRJNA12603) end (bp)
caenorhabditis_elegans_prjna13758	WBGene00007065	III	13780220	13781133	1	Tsp_03716		220783	GL622788	222607
caenorhabditis_elegans_prjna13758	WBGene00007069	X	17714456	17714832	1
caenorhabditis_elegans_prjna13758	WBGene00004098	V	10382442	10384063	1
caenorhabditis_elegans_prjna13758	WBGene00007074	X	248343	249802	1
caenorhabditis_elegans_prjna13758	WBGene00007082	V	14146499	14148784	1	Tsp_10497		1167057	GL622791	1168176
caenorhabditis_elegans_prjna13758	WBGene00007082	V	14146499	14148784	1	Tsp_10496		1164873	GL622791	1166542
caenorhabditis_elegans_prjna13758	WBGene00007080	II	9517567	9518876	-1	Tsp_11550		735716	GL622790	741190
caenorhabditis_elegans_prjna13758	WBGene00007080	II	9517567	9518876	-1	Tsp_12889		454	GL626579	1719
caenorhabditis_elegans_prjna13758	WBGene00007081	II	9519055	9520205	1
caenorhabditis_elegans_prjna13758	WBGene00003231	II	9524174	9526390	1	Tsp_12414		8096	GL624002	8753
caenorhabditis_elegans_prjna13758	WBGene00003231	II	9524174	9526390	1	Tsp_08560	zfp36l2	4699442	GL622788	4700099
caenorhabditis_elegans_prjna13758	WBGene00003231	II	9524174	9526390	1	Tsp_08559	Zfp36l3	4695882	GL622788	4696511
caenorhabditis_elegans_prjna13758	WBGene00003231	II	9524174	9526390	1	Tsp_12415		11512	GL624002	12169
caenorhabditis_elegans_prjna13758	WBGene00003231	II	9524174	9526390	1	Tsp_12413.2		5119	GL624002	5437
caenorhabditis_elegans_prjna13758	WBGene00003231	II	9524174	9526390	1	Tsp_08561		4702854	GL622788	4703511
caenorhabditis_elegans_prjna13758	WBGene00003010	IV	12129504	12135096	1
caenorhabditis_elegans_prjna13758	WBGene00007087	IV	12146486	12150975	-1
caenorhabditis_elegans_prjna13758	WBGene00007088	IV	12143431	12145731	-1
caenorhabditis_elegans_prjna13758	WBGene00007092	IV	12151170	12154245	-1
caenorhabditis_elegans_prjna13758	WBGene00007094	I	12773659	12782282	1
caenorhabditis_elegans_prjna13758	WBGene00007100	V	10315245	10317394	-1	Tsp_03004		2295904	GL622785	2298406
caenorhabditis_elegans_prjna13758	WBGene00007100	V	10315245	10317394	-1	Tsp_14353		1440	GL625580	1821
caenorhabditis_elegans_prjna13758	WBGene00007101	V	10317490	10319534	-1	Tsp_03113		2821299	GL622785	2826101
caenorhabditis_elegans_prjna13758	WBGene00007102	V	10320715	10322304	1
caenorhabditis_elegans_prjna13758	WBGene00000814	I	6022660	6026874	1	Tsp_12920		51	GL624478	1550
caenorhabditis_elegans_prjna13758	WBGene00000814	I	6022660	6026874	1	Tsp_05853		5553253	GL622785	5554722
caenorhabditis_elegans_prjna13758	WBGene00007110	IV	11327576	11329369	-1	Tsp_05978		6065507	GL622785	6068114
caenorhabditis_elegans_prjna13758	WBGene00007111	IV	11329466	11332969	-1	Tsp_06855		8187026	GL622785	8193801
caenorhabditis_elegans_prjna13758	WBGene00007113	IV	11296952	11298388	-1
caenorhabditis_elegans_prjna13758	WBGene00007106	IV	11314078	11315116	-1	Tsp_07852		10925950	GL622785	10926905
caenorhabditis_elegans_prjna13758	WBGene00007107	IV	11315142	11315877	1
caenorhabditis_elegans_prjna13758	WBGene00007109	IV	11320800	11323634	1
caenorhabditis_elegans_prjna13758	WBGene00015006	I	4664499	4665331	1
caenorhabditis_elegans_prjna13758	WBGene00015014	II	2044619	2045601	-1
caenorhabditis_elegans_prjna13758	WBGene00015017	I	10713505	10718201	-1
caenorhabditis_elegans_prjna13758	WBGene00004466	I	10730712	10732448	-1	Tsp_01500		5935932	GL622787	5938440
caenorhabditis_elegans_prjna13758	WBGene00015023	I	10720813	10723496	1
caenorhabditis_elegans_prjna13758	WBGene00015026	I	5965062	5967211	1
caenorhabditis_elegans_prjna13758	WBGene00015029	I	5935370	5936957	-1	Tsp_01904		7798250	GL622787	7799356
caenorhabditis_elegans_prjna13758	WBGene00015030	I	5945581	5947620	-1	Tsp_00226		857479	GL622787	859843
caenorhabditis_elegans_prjna13758	WBGene00015032	I	5957461	5958457	-1
caenorhabditis_elegans_prjna13758	WBGene00006141	V	3974661	3976264	1
caenorhabditis_elegans_prjna13758	WBGene00015049	IV	8155211	8156587	-1	Tsp_02051		8391493	GL622787	8393242
caenorhabditis_elegans_prjna13758	WBGene00015049	IV	8155211	8156587	-1	Tsp_06549		11192741	GL622787	11195348
caenorhabditis_elegans_prjna13758	WBGene00015049	IV	8155211	8156587	-1	Tsp_00662	Ttbk2	2539389	GL622787	2540670
caenorhabditis_elegans_prjna13758	WBGene00015049	IV	8155211	8156587	-1	Tsp_04341	Ttbk1	3010978	GL622788	3012100
caenorhabditis_elegans_prjna13758	WBGene00015049	IV	8155211	8156587	-1	Tsp_06889.2		8369982	GL622785	8372542
caenorhabditis_elegans_prjna13758	WBGene00015051	IV	8164590	8166050	-1
caenorhabditis_elegans_prjna13758	WBGene00015075	V	5269485	5270744	1
caenorhabditis_elegans_prjna13758	WBGene00015073	V	5275554	5278101	-1
caenorhabditis_elegans_prjna13758	WBGene00007117	V	11733733	11736968	-1	Tsp_06250		10255084	GL622787	10258408
caenorhabditis_elegans_prjna13758	WBGene00015083	III	5728180	5730159	1
caenorhabditis_elegans_prjna13758	WBGene00015084	III	5730118	5731030	-1
caenorhabditis_elegans_prjna13758	WBGene00015089	II	6917032	6918922	-1
caenorhabditis_elegans_prjna13758	WBGene00015094	I	5255447	5256945	-1
caenorhabditis_elegans_prjna13758	WBGene00015097	IV	5493992	5495252	1
caenorhabditis_elegans_prjna13758	WBGene00004243	IV	5486685	5490322	1
caenorhabditis_elegans_prjna13758	WBGene00015098	IV	5484046	5486258	-1
caenorhabditis_elegans_prjna13758	WBGene00015105	III	7131880	7133678	-1
caenorhabditis_elegans_prjna13758	WBGene00015106	III	7136510	7138278	-1
caenorhabditis_elegans_prjna13758	WBGene00015102	III	7102086	7103990	-1
caenorhabditis_elegans_prjna13758	WBGene00015104	III	7120905	7122895	-1	Tsp_01679		6868296	GL622787	6869462
caenorhabditis_elegans_prjna13758	WBGene00015104	III	7120905	7122895	-1	Tsp_15885		149	GL627398	1250
caenorhabditis_elegans_prjna13758	WBGene00015112	II	2299854	2300946	-1
caenorhabditis_elegans_prjna13758	WBGene00007137	III	4343446	4345366	1	Tsp_08223	LCMT1	2490491	GL622789	2491537
caenorhabditis_elegans_prjna13758	WBGene00002003	III	4345339	4350079	1	Tsp_05727		4821785	GL622792	4823901
caenorhabditis_elegans_prjna13758	WBGene00015133	III	8717644	8718567	1	Tsp_06271		10162361	GL622787	10164468
caenorhabditis_elegans_prjna13758	WBGene00015134	II	4523622	4524589	1
caenorhabditis_elegans_prjna13758	WBGene00015136	II	4522465	4523222	-1
caenorhabditis_elegans_prjna13758	WBGene00007148	II	11518488	11519571	1
caenorhabditis_elegans_prjna13758	WBGene00003868	II	11493231	11495321	-1
caenorhabditis_elegans_prjna13758	WBGene00007144	II	11495692	11496663	1	Tsp_07093		86989	GL622784	88108
caenorhabditis_elegans_prjna13758	WBGene00000090	II	11519323	11527062	-1
caenorhabditis_elegans_prjna13758	WBGene00015143	III	5711548	5714846	1	Tsp_11096		2198678	GL622784	2208838
caenorhabditis_elegans_prjna13758	WBGene00015145	III	5692896	5693938	1
caenorhabditis_elegans_prjna13758	WBGene00015146	III	5690107	5692740	-1	Tsp_00560	Abi2	2211480	GL622787	2212736
caenorhabditis_elegans_prjna13758	WBGene00015147	III	5694735	5697366	-1
caenorhabditis_elegans_prjna13758	WBGene00002982	III	5697477	5698013	-1
caenorhabditis_elegans_prjna13758	WBGene00015156	III	7293632	7308364	1	Tsp_12298		1887792	GL622784	1890642
caenorhabditis_elegans_prjna13758	WBGene00015156	III	7293632	7308364	1	Tsp_07121		159973	GL622784	161466
caenorhabditis_elegans_prjna13758	WBGene00015160	III	7275502	7277274	-1	Tsp_01157		4491416	GL622787	4495426
caenorhabditis_elegans_prjna13758	WBGene00007150	V	13116488	13120167	1	Tsp_01728		7071336	GL622787	7076470
caenorhabditis_elegans_prjna13758	WBGene00007156	I	10070923	10071900	-1
caenorhabditis_elegans_prjna13758	WBGene00007159	I	10072578	10074399	-1
caenorhabditis_elegans_prjna13758	WBGene00007165	V	15585067	15593185	1
caenorhabditis_elegans_prjna13758	WBGene00007167	III	4754432	4757017	1
caenorhabditis_elegans_prjna13758	WBGene00007168	III	4757201	4759728	1
caenorhabditis_elegans_prjna13758	WBGene00007169	III	4759744	4763609	-1
caenorhabditis_elegans_prjna13758	WBGene00007171	III	4780130	4781987	-1
caenorhabditis_elegans_prjna13758	WBGene00001856	I	5774585	5775610	1
caenorhabditis_elegans_prjna13758	WBGene00000772	I	5788634	5791752	-1	Tsp_10790		3209270	GL622789	3212283
caenorhabditis_elegans_prjna13758	WBGene00001600	I	5792324	5795114	-1	Tsp_12124		535552	GL622790	536415
caenorhabditis_elegans_prjna13758	WBGene00001600	I	5792324	5795114	-1	Tsp_15219		119	GL623636	662
caenorhabditis_elegans_prjna13758	WBGene00015176	I	5803959	5807291	-1	Tsp_10687		2836358	GL622789	2837831
caenorhabditis_elegans_prjna13758	WBGene00015176	I	5803959	5807291	-1	Tsp_10689		2835087	GL622789	2835732
caenorhabditis_elegans_prjna13758	WBGene00015180	X	9278953	9279947	1
caenorhabditis_elegans_prjna13758	WBGene00015191	II	283887	286275	-1
caenorhabditis_elegans_prjna13758	WBGene00015192	II	293864	294706	-1
caenorhabditis_elegans_prjna13758	WBGene00015193	II	296291	297010	-1
caenorhabditis_elegans_prjna13758	WBGene00014660	II	8909008	8909994	-1
caenorhabditis_elegans_prjna13758	WBGene00007179	II	8910913	8912029	-1
caenorhabditis_elegans_prjna13758	WBGene00007184	III	9491640	9497044	1	Tsp_02172		8895404	GL622787	8901352
caenorhabditis_elegans_prjna13758	WBGene00007186	III	9462989	9465965	-1
caenorhabditis_elegans_prjna13758	WBGene00007187	III	9468157	9469899	1
caenorhabditis_elegans_prjna13758	WBGene00007188	III	9465767	9467177	1	Tsp_01169		4704851	GL622787	4706709
caenorhabditis_elegans_prjna13758	WBGene00007189	II	11348430	11349946	1	Tsp_10673		2716682	GL622789	2718806
caenorhabditis_elegans_prjna13758	WBGene00007190	II	11338451	11339620	-1
caenorhabditis_elegans_prjna13758	WBGene00007194	II	11350192	11351373	1	Tsp_10674		2714732	GL622789	2715945
caenorhabditis_elegans_prjna13758	WBGene00015203	II	7699254	7702012	1	Tsp_10993		9685516	GL622785	9689677
caenorhabditis_elegans_prjna13758	WBGene00015208	II	7707586	7708725	-1
caenorhabditis_elegans_prjna13758	WBGene00015210	IV	7446390	7447466	1
caenorhabditis_elegans_prjna13758	WBGene00015215	IV	7419118	7419971	1
caenorhabditis_elegans_prjna13758	WBGene00001228	I	10640465	10642281	-1	Tsp_04424.2		3410600	GL622788	3411573
caenorhabditis_elegans_prjna13758	WBGene00001228	I	10640465	10642281	-1	Tsp_15148		13	GL627104	977
caenorhabditis_elegans_prjna13758	WBGene00001228	I	10640465	10642281	-1	Tsp_12760		96	GL623059	1190
caenorhabditis_elegans_prjna13758	WBGene00001228	I	10640465	10642281	-1	Tsp_15643		323	GL623586	1112
caenorhabditis_elegans_prjna13758	WBGene00015229	I	10646762	10647777	1
caenorhabditis_elegans_prjna13758	WBGene00015230	I	10644245	10645617	1
caenorhabditis_elegans_prjna13758	WBGene00015233	I	10631665	10633150	-1	Tsp_08168		2204578	GL622789	2205585
caenorhabditis_elegans_prjna13758	WBGene00007198	IV	13854355	13857353	1
caenorhabditis_elegans_prjna13758	WBGene00002212	III	8671772	8673626	1
caenorhabditis_elegans_prjna13758	WBGene00003993	III	8670543	8675051	-1
caenorhabditis_elegans_prjna13758	WBGene00015249	IV	3373387	3378130	-1	Tsp_04017		1510331	GL622788	1526730
caenorhabditis_elegans_prjna13758	WBGene00000817	IV	5649533	5651079	1
caenorhabditis_elegans_prjna13758	WBGene00007201	IV	13099378	13100608	1
caenorhabditis_elegans_prjna13758	WBGene00044083	IV	13098978	13099859	1	Tsp_00048		285640	GL622787	287331
caenorhabditis_elegans_prjna13758	WBGene00007207	IV	13100715	13104641	1
caenorhabditis_elegans_prjna13758	WBGene00007209	III	12787643	12789520	-1
caenorhabditis_elegans_prjna13758	WBGene00015282	IV	6635039	6638155	1	Tsp_10574		6049893	GL622792	6050676
caenorhabditis_elegans_prjna13758	WBGene00015282	IV	6635039	6638155	1	Tsp_05984		6316252	GL622785	6318664
caenorhabditis_elegans_prjna13758	WBGene00015282	IV	6635039	6638155	1	Tsp_10580.2		6078786	GL622792	6080403
caenorhabditis_elegans_prjna13758	WBGene00015282	IV	6635039	6638155	1	Tsp_10580.1		6141807	GL622792	6144068
caenorhabditis_elegans_prjna13758	WBGene00015287	II	6664	9486	1	Tsp_04355		3070205	GL622788	3072576
caenorhabditis_elegans_prjna13758	WBGene00015287	II	6664	9486	1	Tsp_13862		585	GL628400	1618
caenorhabditis_elegans_prjna13758	WBGene00015287	II	6664	9486	1	Tsp_02752		1212813	GL622785	1214864
caenorhabditis_elegans_prjna13758	WBGene00015291	II	24666	25446	1
caenorhabditis_elegans_prjna13758	WBGene00015296	II	4301607	4305287	1	Tsp_01672		6547172	GL622787	6549416
caenorhabditis_elegans_prjna13758	WBGene00007221	IV	9096842	9099364	1
caenorhabditis_elegans_prjna13758	WBGene00007222	IV	9099242	9101592	1
caenorhabditis_elegans_prjna13758	WBGene00000374	IV	9101773	9103851	-1
caenorhabditis_elegans_prjna13758	WBGene00001413	IV	9104966	9107609	1
caenorhabditis_elegans_prjna13758	WBGene00007230	V	15099747	15104389	1
caenorhabditis_elegans_prjna13758	WBGene00007239	V	15105327	15105943	-1
caenorhabditis_elegans_prjna13758	WBGene00007234	V	15085747	15087064	1	Tsp_09267	Clybl	5203037	GL622788	5204011
caenorhabditis_elegans_prjna13758	WBGene00007235	V	15084059	15085382	-1	Tsp_02541		366241	GL622785	368940
caenorhabditis_elegans_prjna13758	WBGene00007244	II	14581377	14582361	-1
caenorhabditis_elegans_prjna13758	WBGene00007248	II	14593581	14597657	1
caenorhabditis_elegans_prjna13758	WBGene00004179	IV	6526962	6529802	-1
caenorhabditis_elegans_prjna13758	WBGene00015305	IV	6536179	6537671	1
caenorhabditis_elegans_prjna13758	WBGene00015307	IV	6524610	6526524	1
caenorhabditis_elegans_prjna13758	WBGene00015308	IV	6522874	6524568	1	Tsp_05024		1779167	GL624340	1781017
caenorhabditis_elegans_prjna13758	WBGene00015310	IV	6548818	6552511	1	Tsp_08014		1411158	GL622789	1414870
caenorhabditis_elegans_prjna13758	WBGene00007224	II	9267336	9268303	1
caenorhabditis_elegans_prjna13758	WBGene00007225	II	9269888	9271267	1
caenorhabditis_elegans_prjna13758	WBGene00015312	I	5272846	5274339	-1
caenorhabditis_elegans_prjna13758	WBGene00000965	I	5278803	5281526	-1	Tsp_08944.2		2513297	GL622784	2514018
caenorhabditis_elegans_prjna13758	WBGene00000965	I	5278803	5281526	-1	Tsp_04022		1550849	GL622788	1551646
caenorhabditis_elegans_prjna13758	WBGene00015313	I	5298755	5300331	-1
caenorhabditis_elegans_prjna13758	WBGene00007256	I	7224656	7227767	1
caenorhabditis_elegans_prjna13758	WBGene00007258	I	7229433	7233121	-1	Tsp_06552	GSG2	11176441	GL622787	11180078
caenorhabditis_elegans_prjna13758	WBGene00015327	IV	5090243	5091043	-1
caenorhabditis_elegans_prjna13758	WBGene00015329	IV	5091586	5092807	1
caenorhabditis_elegans_prjna13758	WBGene00015331	IV	5070854	5072263	1
caenorhabditis_elegans_prjna13758	WBGene00015320	X	8147710	8148588	1
caenorhabditis_elegans_prjna13758	WBGene00006246	V	4939260	4940641	-1
caenorhabditis_elegans_prjna13758	WBGene00007265	IV	10523462	10524145	-1
caenorhabditis_elegans_prjna13758	WBGene00002231	III	8250636	8254286	1
caenorhabditis_elegans_prjna13758	WBGene00015345	III	8249619	8250193	1
caenorhabditis_elegans_prjna13758	WBGene00015347	III	8244445	8245794	1	Tsp_02036		8319421	GL622787	8320983
caenorhabditis_elegans_prjna13758	WBGene00015348	III	8236126	8236908	1
caenorhabditis_elegans_prjna13758	WBGene00015349	III	8232651	8234591	1
caenorhabditis_elegans_prjna13758	WBGene00003952	III	8243122	8244092	-1	Tsp_04234		2533154	GL622788	2534654
caenorhabditis_elegans_prjna13758	WBGene00015386	III	7712309	7717314	1
caenorhabditis_elegans_prjna13758	WBGene00007269	III	4091126	4093311	1	Tsp_05227	Ttbk1	2180440	GL622792	2181339
caenorhabditis_elegans_prjna13758	WBGene00007269	III	4091126	4093311	1	Tsp_12209		4940141	GL622792	4941163
caenorhabditis_elegans_prjna13758	WBGene00007269	III	4091126	4093311	1	Tsp_11208		5439495	GL622792	5440343
caenorhabditis_elegans_prjna13758	WBGene00007269	III	4091126	4093311	1	Tsp_12401		2248	GL623394	3147
caenorhabditis_elegans_prjna13758	WBGene00007269	III	4091126	4093311	1	Tsp_12402		5826	GL623394	6369
caenorhabditis_elegans_prjna13758	WBGene00007269	III	4091126	4093311	1	Tsp_13461		44	GL626854	695
caenorhabditis_elegans_prjna13758	WBGene00004392	III	4093306	4094921	-1	Tsp_04092	Rrm2	1929339	GL622788	1930804
caenorhabditis_elegans_prjna13758	WBGene00007274	I	10014547	10015495	1
caenorhabditis_elegans_prjna13758	WBGene00001483	I	10016778	10018114	1
caenorhabditis_elegans_prjna13758	WBGene00000466	I	9665194	9668664	1	Tsp_02609		646372	GL622785	649805
caenorhabditis_elegans_prjna13758	WBGene00003800	I	9660174	9664915	-1
caenorhabditis_elegans_prjna13758	WBGene00007277	I	9658274	9660080	1	Tsp_02412		9731931	GL622787	9733118
caenorhabditis_elegans_prjna13758	WBGene00007278	I	9657012	9657871	-1
caenorhabditis_elegans_prjna13758	WBGene00001645	V	11282572	11286039	1	Tsp_00241		1019798	GL622787	1022295
caenorhabditis_elegans_prjna13758	WBGene00015405	II	386134	387949	1
caenorhabditis_elegans_prjna13758	WBGene00007290	X	12283285	12285307	1	Tsp_10949		9477882	GL622785	9479166
caenorhabditis_elegans_prjna13758	WBGene00015414	IV	3394366	3394527	1
caenorhabditis_elegans_prjna13758	WBGene00015425	V	5914097	5917891	-1
caenorhabditis_elegans_prjna13758	WBGene00015421	V	5907408	5909620	1
caenorhabditis_elegans_prjna13758	WBGene00015422	V	5902133	5904831	1
caenorhabditis_elegans_prjna13758	WBGene00007299	I	9690079	9690557	-1
caenorhabditis_elegans_prjna13758	WBGene00007301	I	9695707	9696762	-1
caenorhabditis_elegans_prjna13758	WBGene00015450	V	5111518	5113754	-1
caenorhabditis_elegans_prjna13758	WBGene00015451	V	5114749	5119209	-1
caenorhabditis_elegans_prjna13758	WBGene00007305	IV	10090658	10092379	1
caenorhabditis_elegans_prjna13758	WBGene00003432	IV	10095398	10095851	1	Tsp_00768		3048065	GL622787	3048698
caenorhabditis_elegans_prjna13758	WBGene00003432	IV	10095398	10095851	1	Tsp_00761		3076026	GL622787	3077501
caenorhabditis_elegans_prjna13758	WBGene00003432	IV	10095398	10095851	1	Tsp_00756		2908432	GL622787	2908941
caenorhabditis_elegans_prjna13758	WBGene00003432	IV	10095398	10095851	1	Tsp_13425		585	GL623126	965
caenorhabditis_elegans_prjna13758	WBGene00003432	IV	10095398	10095851	1	Tsp_13917		820	GL624354	1264
caenorhabditis_elegans_prjna13758	WBGene00007306	IV	10094198	10095259	-1
caenorhabditis_elegans_prjna13758	WBGene00001001	IV	10097196	10106556	1	Tsp_05346		2799977	GL622792	2802923
caenorhabditis_elegans_prjna13758	WBGene00007308	IV	10112870	10114287	1
caenorhabditis_elegans_prjna13758	WBGene00015456	II	5098770	5100242	-1
caenorhabditis_elegans_prjna13758	WBGene00007312	II	14534300	14535365	1
caenorhabditis_elegans_prjna13758	WBGene00003392	II	14552501	14561599	-1
caenorhabditis_elegans_prjna13758	WBGene00003043	IV	6842964	6845805	1	Tsp_02993		2249992	GL622785	2250555
caenorhabditis_elegans_prjna13758	WBGene00003043	IV	6842964	6845805	1	Tsp_12613		1943	GL622995	3807
caenorhabditis_elegans_prjna13758	WBGene00007319	III	9987768	9988421	-1
caenorhabditis_elegans_prjna13758	WBGene00007320	III	9999819	10000528	-1
caenorhabditis_elegans_prjna13758	WBGene00007332	II	9939040	9940432	1
caenorhabditis_elegans_prjna13758	WBGene00007335	IV	11253985	11255703	1
caenorhabditis_elegans_prjna13758	WBGene00007337	IV	11260412	11261185	-1
caenorhabditis_elegans_prjna13758	WBGene00015461	V	7231190	7232749	1	Tsp_09134		3268911	GL622784	3270436
caenorhabditis_elegans_prjna13758	WBGene00015461	V	7231190	7232749	1	Tsp_09138.1		3282445	GL622784	3283294
caenorhabditis_elegans_prjna13758	WBGene00015462	V	7232434	7234826	-1	Tsp_09594		5463128	GL622789	5465428
caenorhabditis_elegans_prjna13758	WBGene00015463	V	7234922	7237130	-1
caenorhabditis_elegans_prjna13758	WBGene00006515	III	6432178	6433145	1
caenorhabditis_elegans_prjna13758	WBGene00015486	III	6427529	6430934	-1	Tsp_00685		2736947	GL622787	2746227
caenorhabditis_elegans_prjna13758	WBGene00015467	III	5614972	5617257	1	Tsp_00610	Ddc	2492021	GL622787	2494539
caenorhabditis_elegans_prjna13758	WBGene00001514	III	5604460	5607549	1
caenorhabditis_elegans_prjna13758	WBGene00005612	V	736803	738870	-1
caenorhabditis_elegans_prjna13758	WBGene00007352	II	10560018	10563407	-1	Tsp_09503		755059	GL622792	760398
caenorhabditis_elegans_prjna13758	WBGene00007354	II	10572247	10574067	1	Tsp_06387		10716569	GL622787	10717856
caenorhabditis_elegans_prjna13758	WBGene00007354	II	10572247	10574067	1	Tsp_13670		166	GL627984	1026
caenorhabditis_elegans_prjna13758	WBGene00007354	II	10572247	10574067	1	Tsp_11877		139964	GL622790	141286
caenorhabditis_elegans_prjna13758	WBGene00007354	II	10572247	10574067	1	Tsp_13257		551	GL628954	1584
caenorhabditis_elegans_prjna13758	WBGene00007354	II	10572247	10574067	1	Tsp_01419		5756161	GL622787	5757550
caenorhabditis_elegans_prjna13758	WBGene00007354	II	10572247	10574067	1	Tsp_06318.1		10514671	GL622787	10515097
caenorhabditis_elegans_prjna13758	WBGene00007354	II	10572247	10574067	1	Tsp_12521		1192	GL627057	2036
caenorhabditis_elegans_prjna13758	WBGene00007354	II	10572247	10574067	1	Tsp_06319.2		10512081	GL622787	10512342
caenorhabditis_elegans_prjna13758	WBGene00007354	II	10572247	10574067	1	Tsp_13571		383	GL628396	1344
caenorhabditis_elegans_prjna13758	WBGene00014667	II	10574842	10578193	-1
caenorhabditis_elegans_prjna13758	WBGene00007355	II	10579366	10579955	1	Tsp_02387		9835641	GL622787	9837057
caenorhabditis_elegans_prjna13758	WBGene00015500	I	6006264	6007295	1
caenorhabditis_elegans_prjna13758	WBGene00015504	I	5981778	5985869	-1
caenorhabditis_elegans_prjna13758	WBGene00015505	I	6008105	6009606	-1
caenorhabditis_elegans_prjna13758	WBGene00004380	I	6009782	6011586	-1
caenorhabditis_elegans_prjna13758	WBGene00015513	II	7779297	7781301	-1
caenorhabditis_elegans_prjna13758	WBGene00004823	II	7783829	7784654	1
caenorhabditis_elegans_prjna13758	WBGene00015515	II	7781566	7783354	1
caenorhabditis_elegans_prjna13758	WBGene00015516	II	7772499	7773914	1	Tsp_06375	Ppp1r7	10759467	GL622787	10760411
caenorhabditis_elegans_prjna13758	WBGene00007380	V	15988754	15991609	1
caenorhabditis_elegans_prjna13758	WBGene00007381	V	15992150	15995607	1
caenorhabditis_elegans_prjna13758	WBGene00007383	V	15996214	15996745	-1
caenorhabditis_elegans_prjna13758	WBGene00015522	III	8591239	8593720	-1
caenorhabditis_elegans_prjna13758	WBGene00000585	IV	7036960	7039580	-1
caenorhabditis_elegans_prjna13758	WBGene00002228	IV	7040211	7043694	1	Tsp_01664		6573483	GL622787	6580525
caenorhabditis_elegans_prjna13758	WBGene00015554	IV	7031298	7032559	-1
caenorhabditis_elegans_prjna13758	WBGene00015557	III	7987121	7990613	1
caenorhabditis_elegans_prjna13758	WBGene00007400	III	9694668	9696517	-1	Tsp_01774		7169067	GL622787	7169886
caenorhabditis_elegans_prjna13758	WBGene00007401	III	9681524	9682829	-1
caenorhabditis_elegans_prjna13758	WBGene00007403	III	9691030	9694572	-1
caenorhabditis_elegans_prjna13758	WBGene00015567	II	7394765	7397351	1
caenorhabditis_elegans_prjna13758	WBGene00007413	II	10339692	10345112	-1	Tsp_01959		8025472	GL622787	8028622
caenorhabditis_elegans_prjna13758	WBGene00007413	II	10339692	10345112	-1	Tsp_01951		7973980	GL622787	7977765
caenorhabditis_elegans_prjna13758	WBGene00007415	II	10360871	10362915	1
caenorhabditis_elegans_prjna13758	WBGene00003961	IV	8176479	8188879	1	Tsp_03730		258841	GL622788	260503
caenorhabditis_elegans_prjna13758	WBGene00015572	IV	8209158	8210400	-1
caenorhabditis_elegans_prjna13758	WBGene00000465	III	4489359	4491392	1
caenorhabditis_elegans_prjna13758	WBGene00015581	III	7499677	7503241	1	Tsp_08098		1850745	GL622789	1854313
caenorhabditis_elegans_prjna13758	WBGene00000479	III	7495320	7497832	-1	Tsp_11234		27730	GL624139	30106
caenorhabditis_elegans_prjna13758	WBGene00001835	II	8020780	8022561	-1
caenorhabditis_elegans_prjna13758	WBGene00004723	II	8034250	8035767	-1	Tsp_02373		9881075	GL622787	9883145
caenorhabditis_elegans_prjna13758	WBGene00007434	II	8035869	8037346	-1	Tsp_14182		50	GL628616	421
caenorhabditis_elegans_prjna13758	WBGene00007434	II	8035869	8037346	-1	Tsp_04580	ACTR6	405642	GL624340	406844
caenorhabditis_elegans_prjna13758	WBGene00006724	II	8038271	8039597	-1
caenorhabditis_elegans_prjna13758	WBGene00007435	II	8040006	8041732	1	Tsp_07541		1728064	GL622784	1729981
caenorhabditis_elegans_prjna13758	WBGene00007436	II	8037316	8038167	-1
caenorhabditis_elegans_prjna13758	WBGene00007428	V	10130405	10134148	-1	Tsp_04413		3360270	GL622788	3362330
caenorhabditis_elegans_prjna13758	WBGene00007429	V	10134643	10143081	1
caenorhabditis_elegans_prjna13758	WBGene00000142	V	10127492	10130295	-1	Tsp_00060		250336	GL622787	253752
caenorhabditis_elegans_prjna13758	WBGene00015590	III	7774778	7776039	-1
caenorhabditis_elegans_prjna13758	WBGene00007457	IV	13648039	13649335	-1
caenorhabditis_elegans_prjna13758	WBGene00007454	IV	13637288	13638525	1
caenorhabditis_elegans_prjna13758	WBGene00007444	IV	11149189	11154334	1	Tsp_02851		1603517	GL622785	1605942
caenorhabditis_elegans_prjna13758	WBGene00007445	IV	11155029	11156634	1
caenorhabditis_elegans_prjna13758	WBGene00007446	IV	11157102	11159492	-1
caenorhabditis_elegans_prjna13758	WBGene00007448	IV	11162768	11164622	-1	Tsp_02051		8391493	GL622787	8393242
caenorhabditis_elegans_prjna13758	WBGene00007448	IV	11162768	11164622	-1	Tsp_06549		11192741	GL622787	11195348
caenorhabditis_elegans_prjna13758	WBGene00007448	IV	11162768	11164622	-1	Tsp_00662	Ttbk2	2539389	GL622787	2540670
caenorhabditis_elegans_prjna13758	WBGene00007448	IV	11162768	11164622	-1	Tsp_04341	Ttbk1	3010978	GL622788	3012100
caenorhabditis_elegans_prjna13758	WBGene00007448	IV	11162768	11164622	-1	Tsp_06889.2		8369982	GL622785	8372542
caenorhabditis_elegans_prjna13758	WBGene00015624	X	6020866	6022569	-1
caenorhabditis_elegans_prjna13758	WBGene00015627	IV	5029250	5031046	1
caenorhabditis_elegans_prjna13758	WBGene00015628	IV	5026523	5029078	-1
caenorhabditis_elegans_prjna13758	WBGene00015629	IV	5031596	5033395	-1
caenorhabditis_elegans_prjna13758	WBGene00003448	IV	5055593	5056049	-1	Tsp_00768		3048065	GL622787	3048698
caenorhabditis_elegans_prjna13758	WBGene00003448	IV	5055593	5056049	-1	Tsp_00761		3076026	GL622787	3077501
caenorhabditis_elegans_prjna13758	WBGene00003448	IV	5055593	5056049	-1	Tsp_00756		2908432	GL622787	2908941
caenorhabditis_elegans_prjna13758	WBGene00003448	IV	5055593	5056049	-1	Tsp_13425		585	GL623126	965
caenorhabditis_elegans_prjna13758	WBGene00003448	IV	5055593	5056049	-1	Tsp_13917		820	GL624354	1264
caenorhabditis_elegans_prjna13758	WBGene00015630	IV	5056973	5061012	-1
caenorhabditis_elegans_prjna13758	WBGene00015634	I	5488309	5490626	1
caenorhabditis_elegans_prjna13758	WBGene00007478	II	14698701	14699362	1
caenorhabditis_elegans_prjna13758	WBGene00001051	IV	8513919	8514725	1	Tsp_07202		442421	GL622784	442780
caenorhabditis_elegans_prjna13758	WBGene00007489	II	10714886	10716416	1
caenorhabditis_elegans_prjna13758	WBGene00006409	IV	8874129	8877022	1
caenorhabditis_elegans_prjna13758	WBGene00003864	IV	8888976	8890999	1	Tsp_12414		8096	GL624002	8753
caenorhabditis_elegans_prjna13758	WBGene00003864	IV	8888976	8890999	1	Tsp_08560	zfp36l2	4699442	GL622788	4700099
caenorhabditis_elegans_prjna13758	WBGene00003864	IV	8888976	8890999	1	Tsp_08559	Zfp36l3	4695882	GL622788	4696511
caenorhabditis_elegans_prjna13758	WBGene00003864	IV	8888976	8890999	1	Tsp_12415		11512	GL624002	12169
caenorhabditis_elegans_prjna13758	WBGene00003864	IV	8888976	8890999	1	Tsp_12413.2		5119	GL624002	5437
caenorhabditis_elegans_prjna13758	WBGene00003864	IV	8888976	8890999	1	Tsp_08561		4702854	GL622788	4703511
caenorhabditis_elegans_prjna13758	WBGene00007500	II	11106616	11108070	1
caenorhabditis_elegans_prjna13758	WBGene00007503	II	11104462	11106046	1
caenorhabditis_elegans_prjna13758	WBGene00015661	V	8084120	8085241	-1
caenorhabditis_elegans_prjna13758	WBGene00003136	I	8125801	8130091	1
caenorhabditis_elegans_prjna13758	WBGene00015670	V	8581261	8583576	1
caenorhabditis_elegans_prjna13758	WBGene00007512	IV	11463609	11465189	-1
caenorhabditis_elegans_prjna13758	WBGene00007513	IV	11470185	11473419	1
caenorhabditis_elegans_prjna13758	WBGene00015685	I	6307303	6308636	1
caenorhabditis_elegans_prjna13758	WBGene00015690	I	6304916	6306363	-1
caenorhabditis_elegans_prjna13758	WBGene00015688	I	6271866	6273780	-1
caenorhabditis_elegans_prjna13758	WBGene00015689	I	6274575	6275291	-1
caenorhabditis_elegans_prjna13758	WBGene00015698	I	4759820	4761321	-1
caenorhabditis_elegans_prjna13758	WBGene00015696	I	4719789	4721098	1
caenorhabditis_elegans_prjna13758	WBGene00015702	IV	6155492	6156960	-1	Tsp_06051		6454142	GL622785	6456063
caenorhabditis_elegans_prjna13758	WBGene00007535	V	10226885	10227434	-1
caenorhabditis_elegans_prjna13758	WBGene00015721	V	7279310	7280530	1
caenorhabditis_elegans_prjna13758	WBGene00006856	II	14485624	14488688	-1	Tsp_04252	USP14	2615257	GL622788	2618051
caenorhabditis_elegans_prjna13758	WBGene00015742	V	7221473	7222156	1
caenorhabditis_elegans_prjna13758	WBGene00015745	V	7219054	7221039	-1
caenorhabditis_elegans_prjna13758	WBGene00015746	V	7222049	7223279	-1
caenorhabditis_elegans_prjna13758	WBGene00015747	III	8616781	8626917	-1
caenorhabditis_elegans_prjna13758	WBGene00007555	II	10579955	10581045	1	Tsp_00421		1613198	GL622787	1614897
caenorhabditis_elegans_prjna13758	WBGene00007561	II	10605717	10607275	-1	Tsp_10672		2721132	GL622789	2721788
caenorhabditis_elegans_prjna13758	WBGene00007563	II	10618471	10620503	1
caenorhabditis_elegans_prjna13758	WBGene00000796	II	10588042	10592652	1
caenorhabditis_elegans_prjna13758	WBGene00007571	V	18167634	18168450	-1
caenorhabditis_elegans_prjna13758	WBGene00007573	III	3702260	3703172	1
caenorhabditis_elegans_prjna13758	WBGene00006474	III	3705265	3706784	1	Tsp_09085		3079631	GL622784	3081934
caenorhabditis_elegans_prjna13758	WBGene00007576	III	3706886	3709225	1
caenorhabditis_elegans_prjna13758	WBGene00007578	III	3719904	3723597	-1
caenorhabditis_elegans_prjna13758	WBGene00007579	III	3718655	3719722	-1
caenorhabditis_elegans_prjna13758	WBGene00007580	III	3725075	3726500	-1
caenorhabditis_elegans_prjna13758	WBGene00007584	V	12588309	12589644	1	Tsp_02716		1067687	GL622785	1074809
caenorhabditis_elegans_prjna13758	WBGene00015765	V	5663591	5665264	1
caenorhabditis_elegans_prjna13758	WBGene00015766	V	5660928	5663473	1
caenorhabditis_elegans_prjna13758	WBGene00003507	V	5658713	5660704	-1
caenorhabditis_elegans_prjna13758	WBGene00015762	V	551279	553167	-1
caenorhabditis_elegans_prjna13758	WBGene00007597	I	7384398	7388792	1
caenorhabditis_elegans_prjna13758	WBGene00007603	I	12213109	12215184	1	Tsp_09827		110653	GL623393	115169
caenorhabditis_elegans_prjna13758	WBGene00007606	V	12745201	12747463	-1
caenorhabditis_elegans_prjna13758	WBGene00004090	II	6965800	6967648	-1
caenorhabditis_elegans_prjna13758	WBGene00015796	II	6967900	6970615	-1
caenorhabditis_elegans_prjna13758	WBGene00007613	V	14393804	14394463	1
caenorhabditis_elegans_prjna13758	WBGene00007615	V	14417903	14420096	1
caenorhabditis_elegans_prjna13758	WBGene00003835	V	14416067	14417835	-1	Tsp_03999		1419239	GL622788	1422640
caenorhabditis_elegans_prjna13758	WBGene00003922	V	14421566	14422618	-1	Tsp_06994		8866864	GL622785	8868285
caenorhabditis_elegans_prjna13758	WBGene00007616	V	14422720	14423383	-1
caenorhabditis_elegans_prjna13758	WBGene00007617	V	14423776	14425008	-1	Tsp_00837		3539588	GL622787	3542931
caenorhabditis_elegans_prjna13758	WBGene00007610	III	9650422	9651971	-1
caenorhabditis_elegans_prjna13758	WBGene00007611	III	9654409	9655859	-1
caenorhabditis_elegans_prjna13758	WBGene00015816	II	4229551	4230686	1
caenorhabditis_elegans_prjna13758	WBGene00015817	II	4227046	4229157	1
caenorhabditis_elegans_prjna13758	WBGene00015818	II	4223309	4226330	1
caenorhabditis_elegans_prjna13758	WBGene00015819	II	4236504	4237751	-1
caenorhabditis_elegans_prjna13758	WBGene00015820	II	4255848	4256989	-1
caenorhabditis_elegans_prjna13758	WBGene00015807	III	6389833	6390841	1	Tsp_00458		1488317	GL622787	1491676
caenorhabditis_elegans_prjna13758	WBGene00002850	III	6383552	6389401	1	Tsp_00218		883551	GL622787	892365
caenorhabditis_elegans_prjna13758	WBGene00015809	III	6381634	6383024	1
caenorhabditis_elegans_prjna13758	WBGene00015811	III	6379449	6380671	1
caenorhabditis_elegans_prjna13758	WBGene00007048	III	6375379	6379190	1
caenorhabditis_elegans_prjna13758	WBGene00015813	III	6368042	6373904	1	Tsp_07461		1402624	GL622784	1407615
caenorhabditis_elegans_prjna13758	WBGene00015813	III	6368042	6373904	1	Tsp_07460		1407617	GL622784	1411127
caenorhabditis_elegans_prjna13758	WBGene00007622	III	4178783	4181438	-1	Tsp_00302	slc25a40	1347682	GL622787	1350630
caenorhabditis_elegans_prjna13758	WBGene00007623	III	4177532	4178664	-1	Tsp_00872	C16C10.2	3407126	GL622787	3408661
caenorhabditis_elegans_prjna13758	WBGene00007624	III	4172337	4176159	-1
caenorhabditis_elegans_prjna13758	WBGene00007625	III	4171336	4172223	1	Tsp_00407		1651900	GL622787	1652758
caenorhabditis_elegans_prjna13758	WBGene00007627	III	4166944	4168765	-1	Tsp_06474.1		11164489	GL622787	11165490
caenorhabditis_elegans_prjna13758	WBGene00007627	III	4166944	4168765	-1	Tsp_06465		10872780	GL622787	10875108
caenorhabditis_elegans_prjna13758	WBGene00007620	I	9715321	9728108	-1	Tsp_10203		6548030	GL622792	6553334
caenorhabditis_elegans_prjna13758	WBGene00015834	II	1881611	1882805	-1
caenorhabditis_elegans_prjna13758	WBGene00015849	II	3453708	3454688	1
caenorhabditis_elegans_prjna13758	WBGene00015850	II	3452721	3453602	1
caenorhabditis_elegans_prjna13758	WBGene00015851	II	3451421	3452409	1
caenorhabditis_elegans_prjna13758	WBGene00015852	II	3449562	3450994	1
caenorhabditis_elegans_prjna13758	WBGene00015853	II	3445760	3446719	1
caenorhabditis_elegans_prjna13758	WBGene00015842	II	3443488	3444380	-1
caenorhabditis_elegans_prjna13758	WBGene00015843	II	3444689	3445381	-1
caenorhabditis_elegans_prjna13758	WBGene00007633	II	9131663	9134543	1
caenorhabditis_elegans_prjna13758	WBGene00015893	II	5537835	5539004	1
caenorhabditis_elegans_prjna13758	WBGene00015890	II	5551833	5552335	1
caenorhabditis_elegans_prjna13758	WBGene00015892	II	5531313	5532259	-1
caenorhabditis_elegans_prjna13758	WBGene00007639	I	11585922	11587294	1
caenorhabditis_elegans_prjna13758	WBGene00007641	I	9408356	9410094	-1
caenorhabditis_elegans_prjna13758	WBGene00007647	I	9435377	9441029	1
caenorhabditis_elegans_prjna13758	WBGene00007643	I	9416704	9418884	-1	Tsp_09446		261775	GL622792	262882
caenorhabditis_elegans_prjna13758	WBGene00007644	I	9419368	9419998	1
caenorhabditis_elegans_prjna13758	WBGene00003904	I	9420907	9421992	-1	Tsp_05477		3588400	GL622792	3591433
caenorhabditis_elegans_prjna13758	WBGene00003904	I	9420907	9421992	-1	Tsp_06460		10887662	GL622787	10895079
caenorhabditis_elegans_prjna13758	WBGene00007645	I	9422556	9431120	1
caenorhabditis_elegans_prjna13758	WBGene00015899	V	3892856	3894573	1
caenorhabditis_elegans_prjna13758	WBGene00015900	V	3866556	3869005	-1
caenorhabditis_elegans_prjna13758	WBGene00015908	I	6682333	6683697	1
caenorhabditis_elegans_prjna13758	WBGene00015912	II	3246316	3248174	-1
caenorhabditis_elegans_prjna13758	WBGene00015915	II	5596547	5598449	1
caenorhabditis_elegans_prjna13758	WBGene00015916	II	5594714	5596463	1	Tsp_01896		7780804	GL622787	7782635
caenorhabditis_elegans_prjna13758	WBGene00015924	X	8181031	8181640	-1	Tsp_03988	arih1l	1378658	GL622788	1380369
caenorhabditis_elegans_prjna13758	WBGene00015937	IV	6795913	6798789	1
caenorhabditis_elegans_prjna13758	WBGene00015938	IV	6770810	6779859	1
caenorhabditis_elegans_prjna13758	WBGene00015929	IV	6793912	6795629	-1
caenorhabditis_elegans_prjna13758	WBGene00015931	IV	6815912	6817654	-1
caenorhabditis_elegans_prjna13758	WBGene00015939	II	5720148	5721791	1
caenorhabditis_elegans_prjna13758	WBGene00015941	II	5716307	5718038	1	Tsp_01503		5926545	GL622787	5928283
caenorhabditis_elegans_prjna13758	WBGene00015941	II	5716307	5718038	1	Tsp_14896		896	GL623976	1443
caenorhabditis_elegans_prjna13758	WBGene00015944	II	5729597	5730443	-1
caenorhabditis_elegans_prjna13758	WBGene00015970	I	4212708	4214317	1
caenorhabditis_elegans_prjna13758	WBGene00015974	I	4193241	4203303	1	Tsp_07793		10664838	GL622785	10667739
caenorhabditis_elegans_prjna13758	WBGene00015975	I	4190142	4193129	1	Tsp_04087		1917334	GL622788	1919052
caenorhabditis_elegans_prjna13758	WBGene00015976	I	4214294	4215768	-1
caenorhabditis_elegans_prjna13758	WBGene00007686	II	8971965	8973566	-1	Tsp_01518		6144799	GL622787	6147126
caenorhabditis_elegans_prjna13758	WBGene00007688	II	8985900	8988062	-1
caenorhabditis_elegans_prjna13758	WBGene00015982	V	4760974	4764179	1
caenorhabditis_elegans_prjna13758	WBGene00001855	V	4754313	4755469	1
caenorhabditis_elegans_prjna13758	WBGene00015987	V	4767886	4769753	-1
caenorhabditis_elegans_prjna13758	WBGene00015988	III	7662428	7672153	1
caenorhabditis_elegans_prjna13758	WBGene00015989	III	7679293	7682292	-1
caenorhabditis_elegans_prjna13758	WBGene00015991	III	7694554	7700381	1
caenorhabditis_elegans_prjna13758	WBGene00015994	IV	593329	595233	1
caenorhabditis_elegans_prjna13758	WBGene00015997	IV	595722	596419	-1
caenorhabditis_elegans_prjna13758	WBGene00016014	III	6195984	6198414	-1	Tsp_06632		11585804	GL622787	11589512
caenorhabditis_elegans_prjna13758	WBGene00016015	III	6202619	6206211	-1	Tsp_09877		286531	GL623393	290269
caenorhabditis_elegans_prjna13758	WBGene00016015	III	6202619	6206211	-1	Tsp_00836		3543110	GL622787	3548373
caenorhabditis_elegans_prjna13758	WBGene00016015	III	6202619	6206211	-1	Tsp_13268		606	GL627345	2400
caenorhabditis_elegans_prjna13758	WBGene00016021	II	47580	50303	1
caenorhabditis_elegans_prjna13758	WBGene00016040	I	5401757	5402896	1
caenorhabditis_elegans_prjna13758	WBGene00005219	V	2740444	2744326	-1
caenorhabditis_elegans_prjna13758	WBGene00016053	IV	5166330	5168427	1
caenorhabditis_elegans_prjna13758	WBGene00016054	IV	5163293	5164351	1
caenorhabditis_elegans_prjna13758	WBGene00016055	IV	5160522	5161388	1
caenorhabditis_elegans_prjna13758	WBGene00016056	IV	5150093	5151213	1
caenorhabditis_elegans_prjna13758	WBGene00016057	IV	5159427	5160248	-1
caenorhabditis_elegans_prjna13758	WBGene00016058	IV	5162743	5163074	-1
caenorhabditis_elegans_prjna13758	WBGene00043147	IV	5165420	5165777	-1
caenorhabditis_elegans_prjna13758	WBGene00007697	IV	10222472	10223745	1
caenorhabditis_elegans_prjna13758	WBGene00000019	IV	10206189	10214911	-1
caenorhabditis_elegans_prjna13758	WBGene00006376	V	5536681	5537713	1
caenorhabditis_elegans_prjna13758	WBGene00016062	V	5534131	5535837	-1	Tsp_02906		1861679	GL622785	1862687
caenorhabditis_elegans_prjna13758	WBGene00007699	III	11787690	11789496	1	Tsp_01125		4353662	GL622787	4354442
caenorhabditis_elegans_prjna13758	WBGene00007700	III	11790497	11792295	-1	Tsp_01125		4353662	GL622787	4354442
caenorhabditis_elegans_prjna13758	WBGene00000931	I	10187515	10190896	-1
caenorhabditis_elegans_prjna13758	WBGene00007711	I	10191273	10192894	-1	Tsp_06765	ABHD4	7795671	GL622785	7797598
caenorhabditis_elegans_prjna13758	WBGene00006447	I	10159982	10161883	-1	Tsp_08271	rnmt	3577564	GL622788	3578604
caenorhabditis_elegans_prjna13758	WBGene00045383	I	10169639	10172645	-1	Tsp_11602		1878928	GL622792	1883015
caenorhabditis_elegans_prjna13758	WBGene00007708	I	10179042	10179236	1
caenorhabditis_elegans_prjna13758	WBGene00007710	I	10185780	10187550	1
caenorhabditis_elegans_prjna13758	WBGene00016086	X	9119774	9121687	1
caenorhabditis_elegans_prjna13758	WBGene00016081	V	5408528	5410071	1
caenorhabditis_elegans_prjna13758	WBGene00016082	IV	7011135	7011248	1
caenorhabditis_elegans_prjna13758	WBGene00016083	IV	7009841	7010744	1
caenorhabditis_elegans_prjna13758	WBGene00016085	IV	6999557	7001493	1
caenorhabditis_elegans_prjna13758	WBGene00007714	V	15036237	15036869	-1
caenorhabditis_elegans_prjna13758	WBGene00007721	V	15032142	15034069	1
caenorhabditis_elegans_prjna13758	WBGene00007715	V	15037795	15038835	-1
caenorhabditis_elegans_prjna13758	WBGene00007718	V	15066298	15067464	1	Tsp_01660		6592686	GL622787	6593634
caenorhabditis_elegans_prjna13758	WBGene00007727	V	19395055	19396609	1
caenorhabditis_elegans_prjna13758	WBGene00007732	IV	12452066	12454215	-1
caenorhabditis_elegans_prjna13758	WBGene00001085	IV	12445801	12451299	-1
caenorhabditis_elegans_prjna13758	WBGene00007733	IV	12455097	12456175	1
caenorhabditis_elegans_prjna13758	WBGene00007734	IV	12456913	12458561	1
caenorhabditis_elegans_prjna13758	WBGene00016113	II	5691662	5693939	1
caenorhabditis_elegans_prjna13758	WBGene00016124	IV	8018130	8019808	-1	Tsp_04132		2112017	GL622788	2115828
caenorhabditis_elegans_prjna13758	WBGene00016125	IV	8021146	8022122	-1
caenorhabditis_elegans_prjna13758	WBGene00016128	IV	8016994	8018221	1
caenorhabditis_elegans_prjna13758	WBGene00007042	I	7495437	7503577	1	Tsp_06604		11723760	GL622787	11724725
caenorhabditis_elegans_prjna13758	WBGene00007740	I	7505951	7506693	1
caenorhabditis_elegans_prjna13758	WBGene00004304	II	8322612	8325052	-1	Tsp_06544		11210634	GL622787	11216207
caenorhabditis_elegans_prjna13758	WBGene00001840	II	8326852	8328870	-1	Tsp_09354		5551190	GL622788	5554956
caenorhabditis_elegans_prjna13758	WBGene00001840	II	8326852	8328870	-1	Tsp_12657		7580	GL625015	11111
caenorhabditis_elegans_prjna13758	WBGene00016137	III	4956891	4957539	1
caenorhabditis_elegans_prjna13758	WBGene00001499	III	4937322	4939453	1	Tsp_03679	fsn-1	95659	GL622788	98014
caenorhabditis_elegans_prjna13758	WBGene00016142	III	4935578	4937223	1	Tsp_05414		3282267	GL622792	3287835
caenorhabditis_elegans_prjna13758	WBGene00016148	V	7777300	7778985	1
caenorhabditis_elegans_prjna13758	WBGene00016154	I	6041672	6046018	1
caenorhabditis_elegans_prjna13758	WBGene00006492	I	6038406	6041265	1
caenorhabditis_elegans_prjna13758	WBGene00016156	I	6053785	6055821	-1
caenorhabditis_elegans_prjna13758	WBGene00016157	I	6055947	6058424	-1
caenorhabditis_elegans_prjna13758	WBGene00016151	II	5062129	5067116	1	Tsp_08511		4518222	GL622788	4523362
caenorhabditis_elegans_prjna13758	WBGene00016151	II	5062129	5067116	1	Tsp_13083		2428	GL629160	3225
caenorhabditis_elegans_prjna13758	WBGene00002068	II	5054084	5055338	-1
caenorhabditis_elegans_prjna13758	WBGene00001102	II	5078235	5081161	-1	Tsp_08621		3641980	GL622789	3645765
caenorhabditis_elegans_prjna13758	WBGene00007761	IV	8894081	8901386	1
caenorhabditis_elegans_prjna13758	WBGene00007762	IV	8901646	8903177	1
caenorhabditis_elegans_prjna13758	WBGene00007763	IV	8903222	8906205	-1	Tsp_01125		4353662	GL622787	4354442
caenorhabditis_elegans_prjna13758	WBGene00007766	I	11439289	11440709	1
caenorhabditis_elegans_prjna13758	WBGene00016161	II	5173710	5174470	-1
caenorhabditis_elegans_prjna13758	WBGene00007777	IV	12717831	12719391	1
caenorhabditis_elegans_prjna13758	WBGene00007778	IV	12712765	12714771	1
caenorhabditis_elegans_prjna13758	WBGene00016163	II	4753413	4755595	1
caenorhabditis_elegans_prjna13758	WBGene00016168	III	4979796	4980418	-1
caenorhabditis_elegans_prjna13758	WBGene00016169	III	4980644	4984474	-1
caenorhabditis_elegans_prjna13758	WBGene00007784	V	9978791	9980802	-1
caenorhabditis_elegans_prjna13758	WBGene00007785	V	9981249	9982766	1
caenorhabditis_elegans_prjna13758	WBGene00007788	III	4429618	4434399	-1
caenorhabditis_elegans_prjna13758	WBGene00007789	III	4434750	4439543	-1
caenorhabditis_elegans_prjna13758	WBGene00003590	III	4442081	4444237	1
caenorhabditis_elegans_prjna13758	WBGene00007791	III	4423711	4429499	-1
caenorhabditis_elegans_prjna13758	WBGene00016177	IV	8501479	8502983	1
caenorhabditis_elegans_prjna13758	WBGene00016181	IV	8474056	8475278	1
caenorhabditis_elegans_prjna13758	WBGene00016178	IV	8499310	8500076	1
caenorhabditis_elegans_prjna13758	WBGene00001607	IV	9739219	9740908	-1	Tsp_04186		2339558	GL622788	2341969
caenorhabditis_elegans_prjna13758	WBGene00007794	IV	9741875	9743147	-1
caenorhabditis_elegans_prjna13758	WBGene00007795	IV	9747228	9748442	-1
caenorhabditis_elegans_prjna13758	WBGene00016192	III	5926086	5926987	1	Tsp_01303	C28H8.1	5127608	GL622787	5128684
caenorhabditis_elegans_prjna13758	WBGene00016200	III	5903576	5906122	-1	Tsp_04288		2767119	GL622788	2770620
caenorhabditis_elegans_prjna13758	WBGene00007797	V	10812343	10813487	-1
caenorhabditis_elegans_prjna13758	WBGene00007798	V	10809191	10811076	-1
caenorhabditis_elegans_prjna13758	WBGene00016202	III	7941717	7945593	1
caenorhabditis_elegans_prjna13758	WBGene00003801	III	7929013	7932993	1
caenorhabditis_elegans_prjna13758	WBGene00004084	IV	11876156	11877839	-1
caenorhabditis_elegans_prjna13758	WBGene00016211	II	6299502	6301398	1
caenorhabditis_elegans_prjna13758	WBGene00016212	II	6290652	6292524	-1
caenorhabditis_elegans_prjna13758	WBGene00016213	II	6298085	6298675	-1
caenorhabditis_elegans_prjna13758	WBGene00001435	X	13421824	13423427	-1
caenorhabditis_elegans_prjna13758	WBGene00016226	III	121735	122020	-1
caenorhabditis_elegans_prjna13758	WBGene00016223	III	98398	98922	-1
caenorhabditis_elegans_prjna13758	WBGene00004680	II	6125559	6127942	1	Tsp_11858		56958	GL622790	61153
caenorhabditis_elegans_prjna13758	WBGene00016236	II	6110452	6113194	-1
caenorhabditis_elegans_prjna13758	WBGene00016238	III	8225097	8226386	1	Tsp_05146	Mob4	2199381	GL624340	2200742
caenorhabditis_elegans_prjna13758	WBGene00016239	III	8222226	8223792	1	Tsp_06294		10331217	GL622787	10333834
caenorhabditis_elegans_prjna13758	WBGene00077732	II	6198696	6201628	1
caenorhabditis_elegans_prjna13758	WBGene00000771	II	6192784	6195170	1
caenorhabditis_elegans_prjna13758	WBGene00016245	II	6195813	6196959	-1	Tsp_08389		4043238	GL622788	4044742
caenorhabditis_elegans_prjna13758	WBGene00016249	III	8449757	8450519	1
caenorhabditis_elegans_prjna13758	WBGene00004460	III	8447353	8449346	1	Tsp_00955	Psmd3	3892714	GL622787	3895439
caenorhabditis_elegans_prjna13758	WBGene00016250	III	8443917	8446920	-1	Tsp_00561		2206125	GL622787	2210532
caenorhabditis_elegans_prjna13758	WBGene00016263	I	6972157	6973789	-1
caenorhabditis_elegans_prjna13758	WBGene00004244	II	7296110	7298247	-1	Tsp_04240		2554050	GL622788	2555842
caenorhabditis_elegans_prjna13758	WBGene00007850	V	18179943	18181373	1
caenorhabditis_elegans_prjna13758	WBGene00007853	V	18172484	18178759	-1
caenorhabditis_elegans_prjna13758	WBGene00016286	IV	5797453	5800233	1
caenorhabditis_elegans_prjna13758	WBGene00016287	IV	5791296	5793457	1
caenorhabditis_elegans_prjna13758	WBGene00016288	IV	5794932	5796825	-1
caenorhabditis_elegans_prjna13758	WBGene00016291	IV	5811583	5814142	-1
caenorhabditis_elegans_prjna13758	WBGene00005479	II	983142	984620	1
caenorhabditis_elegans_prjna13758	WBGene00007863	V	10645020	10646963	-1
caenorhabditis_elegans_prjna13758	WBGene00016317	II	6349207	6351987	-1
caenorhabditis_elegans_prjna13758	WBGene00016318	II	6352542	6355911	-1
caenorhabditis_elegans_prjna13758	WBGene00016312	II	6321340	6323079	-1
caenorhabditis_elegans_prjna13758	WBGene00016313	II	6329850	6331341	-1
caenorhabditis_elegans_prjna13758	WBGene00016327	I	5232576	5235222	1
caenorhabditis_elegans_prjna13758	WBGene00016322	I	3783835	3784435	1
caenorhabditis_elegans_prjna13758	WBGene00016323	I	3782118	3783294	1	Tsp_05204		2446915	GL624340	2448276
caenorhabditis_elegans_prjna13758	WBGene00004217	I	3789309	3792797	-1	Tsp_01463		6095018	GL622787	6100354
caenorhabditis_elegans_prjna13758	WBGene00004217	I	3789309	3792797	-1	Tsp_07377		932107	GL622784	944288
caenorhabditis_elegans_prjna13758	WBGene00004217	I	3789309	3792797	-1	Tsp_06808		7963255	GL622785	7966665
caenorhabditis_elegans_prjna13758	WBGene00004217	I	3789309	3792797	-1	Tsp_02133		8604279	GL622787	8606182
caenorhabditis_elegans_prjna13758	WBGene00003020	I	5807709	5815637	1
caenorhabditis_elegans_prjna13758	WBGene00001973	I	5815609	5818132	-1	Tsp_07406		1229278	GL622784	1234117
caenorhabditis_elegans_prjna13758	WBGene00007870	IV	12930889	12931514	1
caenorhabditis_elegans_prjna13758	WBGene00007888	IV	9505615	9506326	-1
caenorhabditis_elegans_prjna13758	WBGene00016336	II	2165440	2166498	-1
caenorhabditis_elegans_prjna13758	WBGene00016358	II	4836304	4837759	-1	Tsp_02716		1067687	GL622785	1074809
caenorhabditis_elegans_prjna13758	WBGene00016352	II	4828560	4832469	1	Tsp_01646		6625315	GL622787	6629865
caenorhabditis_elegans_prjna13758	WBGene00016352	II	4828560	4832469	1	Tsp_15670		242	GL623305	859
caenorhabditis_elegans_prjna13758	WBGene00016353	II	4795761	4797216	1
caenorhabditis_elegans_prjna13758	WBGene00016356	II	4823381	4825196	-1
caenorhabditis_elegans_prjna13758	WBGene00003435	II	4825380	4825837	1	Tsp_00768		3048065	GL622787	3048698
caenorhabditis_elegans_prjna13758	WBGene00003435	II	4825380	4825837	1	Tsp_00761		3076026	GL622787	3077501
caenorhabditis_elegans_prjna13758	WBGene00003435	II	4825380	4825837	1	Tsp_00756		2908432	GL622787	2908941
caenorhabditis_elegans_prjna13758	WBGene00003435	II	4825380	4825837	1	Tsp_13425		585	GL623126	965
caenorhabditis_elegans_prjna13758	WBGene00003435	II	4825380	4825837	1	Tsp_13917		820	GL624354	1264
caenorhabditis_elegans_prjna13758	WBGene00016380	IV	7792349	7794809	-1	Tsp_01927		7869736	GL622787	7873897
caenorhabditis_elegans_prjna13758	WBGene00016380	IV	7792349	7794809	-1	Tsp_01928		7867951	GL622787	7869171
caenorhabditis_elegans_prjna13758	WBGene00016381	IV	7794871	7796376	-1
caenorhabditis_elegans_prjna13758	WBGene00016382	IV	7801916	7803350	-1
caenorhabditis_elegans_prjna13758	WBGene00016383	IV	7811157	7812809	-1
caenorhabditis_elegans_prjna13758	WBGene00002221	IV	7797192	7800252	1
caenorhabditis_elegans_prjna13758	WBGene00016373	IV	7776025	7778022	1	Tsp_12380		8229	GL628879	9959
caenorhabditis_elegans_prjna13758	WBGene00016373	IV	7776025	7778022	1	Tsp_02441		9639288	GL622787	9641840
caenorhabditis_elegans_prjna13758	WBGene00016373	IV	7776025	7778022	1	Tsp_12379		4716	GL628879	6017
caenorhabditis_elegans_prjna13758	WBGene00016374	IV	7774411	7775956	1	Tsp_02440		9642505	GL622787	9644648
caenorhabditis_elegans_prjna13758	WBGene00016374	IV	7774411	7775956	1	Tsp_10182	WDR82	6456671	GL622792	6458439
caenorhabditis_elegans_prjna13758	WBGene00016374	IV	7774411	7775956	1	Tsp_08028	wdr82	1461714	GL622789	1463096
caenorhabditis_elegans_prjna13758	WBGene00016375	IV	7777939	7778965	-1
caenorhabditis_elegans_prjna13758	WBGene00016387	I	10687363	10688068	1
caenorhabditis_elegans_prjna13758	WBGene00016388	I	10672737	10674864	1	Tsp_02051		8391493	GL622787	8393242
caenorhabditis_elegans_prjna13758	WBGene00016388	I	10672737	10674864	1	Tsp_06549		11192741	GL622787	11195348
caenorhabditis_elegans_prjna13758	WBGene00016388	I	10672737	10674864	1	Tsp_00662	Ttbk2	2539389	GL622787	2540670
caenorhabditis_elegans_prjna13758	WBGene00016388	I	10672737	10674864	1	Tsp_04341	Ttbk1	3010978	GL622788	3012100
caenorhabditis_elegans_prjna13758	WBGene00016388	I	10672737	10674864	1	Tsp_06889.2		8369982	GL622785	8372542
caenorhabditis_elegans_prjna13758	WBGene00016389	I	10671460	10672589	-1
caenorhabditis_elegans_prjna13758	WBGene00016392	I	10683270	10685664	-1	Tsp_06974		8734959	GL622785	8739582
caenorhabditis_elegans_prjna13758	WBGene00007921	III	3456435	3460106	1
caenorhabditis_elegans_prjna13758	WBGene00016402	IV	7119918	7121413	-1
caenorhabditis_elegans_prjna13758	WBGene00000888	IV	7132132	7133217	-1	Tsp_11356	Ppil1	7175329	GL622792	7176101
caenorhabditis_elegans_prjna13758	WBGene00016398	IV	7154656	7156010	1
caenorhabditis_elegans_prjna13758	WBGene00016399	IV	7153623	7154193	1
caenorhabditis_elegans_prjna13758	WBGene00006113	IV	7122194	7123947	1
caenorhabditis_elegans_prjna13758	WBGene00001661	III	5259023	5260512	1
caenorhabditis_elegans_prjna13758	WBGene00006946	III	5236410	5240055	1
caenorhabditis_elegans_prjna13758	WBGene00016408	III	5230555	5234530	1	Tsp_08085		1807874	GL622789	1812874
caenorhabditis_elegans_prjna13758	WBGene00016408	III	5230555	5234530	1	Tsp_08087		1813695	GL622789	1815636
caenorhabditis_elegans_prjna13758	WBGene00016409	III	5249075	5254187	-1
caenorhabditis_elegans_prjna13758	WBGene00016413	II	5212932	5213932	1
caenorhabditis_elegans_prjna13758	WBGene00016414	II	5212270	5212789	1
caenorhabditis_elegans_prjna13758	WBGene00003443	II	5199763	5200223	1	Tsp_00768		3048065	GL622787	3048698
caenorhabditis_elegans_prjna13758	WBGene00003443	II	5199763	5200223	1	Tsp_00761		3076026	GL622787	3077501
caenorhabditis_elegans_prjna13758	WBGene00003443	II	5199763	5200223	1	Tsp_00756		2908432	GL622787	2908941
caenorhabditis_elegans_prjna13758	WBGene00003443	II	5199763	5200223	1	Tsp_13425		585	GL623126	965
caenorhabditis_elegans_prjna13758	WBGene00003443	II	5199763	5200223	1	Tsp_13917		820	GL624354	1264
caenorhabditis_elegans_prjna13758	WBGene00016416	II	5195804	5199257	1	Tsp_08852		4870180	GL622789	4874051
caenorhabditis_elegans_prjna13758	WBGene00016416	II	5195804	5199257	1	Tsp_08682		3923843	GL622789	3926450
caenorhabditis_elegans_prjna13758	WBGene00016416	II	5195804	5199257	1	Tsp_08683		3927517	GL622789	3929569
caenorhabditis_elegans_prjna13758	WBGene00003442	II	5194332	5194792	1
caenorhabditis_elegans_prjna13758	WBGene00016420	I	5896618	5897405	1
caenorhabditis_elegans_prjna13758	WBGene00016421	I	5872174	5874343	1	Tsp_08585		3412775	GL622789	3414893
caenorhabditis_elegans_prjna13758	WBGene00007948	V	10497059	10499324	1
caenorhabditis_elegans_prjna13758	WBGene00016446	III	4860669	4861794	-1	Tsp_02096		8768127	GL622787	8769622
caenorhabditis_elegans_prjna13758	WBGene00016447	III	4868333	4868769	-1
caenorhabditis_elegans_prjna13758	WBGene00016449	III	4877526	4878311	-1
caenorhabditis_elegans_prjna13758	WBGene00016440	III	4870762	4872046	1
caenorhabditis_elegans_prjna13758	WBGene00016441	III	4868921	4870106	1
caenorhabditis_elegans_prjna13758	WBGene00016445	III	4855250	4856101	1
caenorhabditis_elegans_prjna13758	WBGene00000418	III	4852313	4855177	1	Tsp_01495		5944733	GL622787	5951134
caenorhabditis_elegans_prjna13758	WBGene00016460	I	10808590	10810497	1
caenorhabditis_elegans_prjna13758	WBGene00016461	I	10806922	10808238	1
caenorhabditis_elegans_prjna13758	WBGene00007965	III	3841262	3843614	-1	Tsp_05595.2		4125734	GL622792	4125949
caenorhabditis_elegans_prjna13758	WBGene00007966	III	3844893	3848341	1
caenorhabditis_elegans_prjna13758	WBGene00000264	III	3853026	3862958	-1
caenorhabditis_elegans_prjna13758	WBGene00007977	I	8749616	8751397	-1
caenorhabditis_elegans_prjna13758	WBGene00007978	I	8755846	8757603	-1
caenorhabditis_elegans_prjna13758	WBGene00007979	I	8752236	8755678	1	Tsp_08733		4178521	GL622789	4180786
caenorhabditis_elegans_prjna13758	WBGene00007971	I	8728687	8730054	1	Tsp_11760		5042635	GL622789	5043652
caenorhabditis_elegans_prjna13758	WBGene00007971	I	8728687	8730054	1	Tsp_09380		748	GL622792	5462
caenorhabditis_elegans_prjna13758	WBGene00003925	I	8727214	8728497	-1	Tsp_09781	psma7	6273678	GL622789	6276581
caenorhabditis_elegans_prjna13758	WBGene00007972	I	8733413	8735717	-1	Tsp_03946		1182003	GL622788	1186580
caenorhabditis_elegans_prjna13758	WBGene00007974	I	8736213	8737038	1
caenorhabditis_elegans_prjna13758	WBGene00007975	I	8737072	8742548	1
caenorhabditis_elegans_prjna13758	WBGene00016470	V	3179527	3181064	1
caenorhabditis_elegans_prjna13758	WBGene00016485	X	1682954	1686419	1
caenorhabditis_elegans_prjna13758	WBGene00016486	X	1676205	1678121	-1
caenorhabditis_elegans_prjna13758	WBGene00007987	IV	12743039	12744813	-1
caenorhabditis_elegans_prjna13758	WBGene00004110	I	6791025	6797470	1
caenorhabditis_elegans_prjna13758	WBGene00016491	I	6784854	6787139	1
caenorhabditis_elegans_prjna13758	WBGene00000871	I	6780806	6784396	1
caenorhabditis_elegans_prjna13758	WBGene00016495	V	7857963	7859909	1
caenorhabditis_elegans_prjna13758	WBGene00016501	V	7852286	7853975	-1
caenorhabditis_elegans_prjna13758	WBGene00016508	V	4827360	4836025	1	Tsp_01458		5870508	GL622787	5876278
caenorhabditis_elegans_prjna13758	WBGene00008001	III	9384172	9385643	-1
caenorhabditis_elegans_prjna13758	WBGene00001689	III	9391270	9393164	-1
caenorhabditis_elegans_prjna13758	WBGene00016512	V	1495634	1497985	1
caenorhabditis_elegans_prjna13758	WBGene00016516	V	1501420	1505310	-1
caenorhabditis_elegans_prjna13758	WBGene00003210	III	4786080	4792391	1
caenorhabditis_elegans_prjna13758	WBGene00008005	III	4793086	4795423	1
caenorhabditis_elegans_prjna13758	WBGene00003912	III	4804708	4809489	-1	Tsp_00888		3332437	GL622787	3336228
caenorhabditis_elegans_prjna13758	WBGene00008034	IV	13091187	13093853	-1	Tsp_02448	PRCC	9619085	GL622787	9619940
caenorhabditis_elegans_prjna13758	WBGene00008035	IV	13094007	13095490	1
caenorhabditis_elegans_prjna13758	WBGene00004339	IV	13095762	13097065	1	Tsp_10836	RFC3	110448	GL623868	111895
caenorhabditis_elegans_prjna13758	WBGene00016541	IV	5631895	5633379	1	Tsp_02051		8391493	GL622787	8393242
caenorhabditis_elegans_prjna13758	WBGene00016541	IV	5631895	5633379	1	Tsp_06549		11192741	GL622787	11195348
caenorhabditis_elegans_prjna13758	WBGene00016541	IV	5631895	5633379	1	Tsp_00662	Ttbk2	2539389	GL622787	2540670
caenorhabditis_elegans_prjna13758	WBGene00016541	IV	5631895	5633379	1	Tsp_04341	Ttbk1	3010978	GL622788	3012100
caenorhabditis_elegans_prjna13758	WBGene00016541	IV	5631895	5633379	1	Tsp_06889.2		8369982	GL622785	8372542
caenorhabditis_elegans_prjna13758	WBGene00000770	III	9322316	9324733	1
caenorhabditis_elegans_prjna13758	WBGene00043187	X	11739050	11739154	1
caenorhabditis_elegans_prjna13758	WBGene00008048	X	11775190	11775728	1
caenorhabditis_elegans_prjna13758	WBGene00008053	II	8137880	8141276	1	Tsp_09503		755059	GL622792	760398
caenorhabditis_elegans_prjna13758	WBGene00001231	I	4444719	4446598	1
caenorhabditis_elegans_prjna13758	WBGene00016564	I	4449879	4450927	-1
caenorhabditis_elegans_prjna13758	WBGene00016566	I	4451200	4456805	-1
caenorhabditis_elegans_prjna13758	WBGene00005536	V	15212169	15213706	1
caenorhabditis_elegans_prjna13758	WBGene00008058	V	15207088	15207781	-1
caenorhabditis_elegans_prjna13758	WBGene00008061	I	9517026	9518736	-1
caenorhabditis_elegans_prjna13758	WBGene00008062	I	9519244	9521275	1
caenorhabditis_elegans_prjna13758	WBGene00008063	I	9526540	9527441	-1
caenorhabditis_elegans_prjna13758	WBGene00016592	IV	12287928	12289392	1	Tsp_03442		4267278	GL622785	4268827
caenorhabditis_elegans_prjna13758	WBGene00016586	IV	12291046	12293317	1	Tsp_02920		1923099	GL622785	1924691
caenorhabditis_elegans_prjna13758	WBGene00004411	IV	7160135	7165748	-1
caenorhabditis_elegans_prjna13758	WBGene00016601	I	4270697	4273332	1	Tsp_09565		1018674	GL622792	1025486
caenorhabditis_elegans_prjna13758	WBGene00000382	I	4268070	4270287	-1	Tsp_03181		3139679	GL622785	3141619
caenorhabditis_elegans_prjna13758	WBGene00016602	I	4265109	4267238	1	Tsp_04894		1389752	GL624340	1392007
caenorhabditis_elegans_prjna13758	WBGene00007001	I	4247754	4249415	1	Tsp_07198		452845	GL622784	454391
caenorhabditis_elegans_prjna13758	WBGene00016605	I	4236954	4238617	1
caenorhabditis_elegans_prjna13758	WBGene00016607	I	4267199	4267967	-1
caenorhabditis_elegans_prjna13758	WBGene00008074	IV	10590925	10593042	1
caenorhabditis_elegans_prjna13758	WBGene00016612	IV	6578197	6579402	1
caenorhabditis_elegans_prjna13758	WBGene00016623	II	6902095	6902937	1
caenorhabditis_elegans_prjna13758	WBGene00016630	II	6888553	6890418	-1	Tsp_05518		3789879	GL622792	3792123
caenorhabditis_elegans_prjna13758	WBGene00008079	III	10875459	10878061	1
caenorhabditis_elegans_prjna13758	WBGene00008080	III	10878191	10880183	-1
caenorhabditis_elegans_prjna13758	WBGene00008081	III	10882345	10893672	1
caenorhabditis_elegans_prjna13758	WBGene00016652	I	4637432	4640882	-1	Tsp_04835		1208323	GL624340	1209451
caenorhabditis_elegans_prjna13758	WBGene00016653	I	4634103	4635620	1	Tsp_01639		6662197	GL622787	6666292
caenorhabditis_elegans_prjna13758	WBGene00016653	I	4634103	4635620	1	Tsp_01638		6666339	GL622787	6669011
caenorhabditis_elegans_prjna13758	WBGene00016654	I	4605655	4610202	1	Tsp_09955		512546	GL623393	515010
caenorhabditis_elegans_prjna13758	WBGene00008107	I	9221834	9226390	-1	Tsp_06395		10671288	GL622787	10678487
caenorhabditis_elegans_prjna13758	WBGene00001590	I	9226905	9228184	1	Tsp_07794		10663549	GL622785	10664675
caenorhabditis_elegans_prjna13758	WBGene00016673	III	5074698	5075968	1
caenorhabditis_elegans_prjna13758	WBGene00016674	III	5069001	5070418	1
caenorhabditis_elegans_prjna13758	WBGene00016675	III	5062706	5063862	1
caenorhabditis_elegans_prjna13758	WBGene00016680	III	5054603	5055857	-1
caenorhabditis_elegans_prjna13758	WBGene00016698	IV	7763931	7767094	1
caenorhabditis_elegans_prjna13758	WBGene00016701	IV	7757513	7759627	-1
caenorhabditis_elegans_prjna13758	WBGene00016702	IV	7760000	7763848	-1
caenorhabditis_elegans_prjna13758	WBGene00001827	IV	7770770	7774275	-1	Tsp_06154		7076076	GL622785	7080215
caenorhabditis_elegans_prjna13758	WBGene00016704	X	4637242	4643695	1	Tsp_02264		9164081	GL622787	9168128
caenorhabditis_elegans_prjna13758	WBGene00016707	II	3724225	3725909	1
caenorhabditis_elegans_prjna13758	WBGene00008118	III	3648792	3650832	-1
caenorhabditis_elegans_prjna13758	WBGene00016727	I	5055686	5056039	1
caenorhabditis_elegans_prjna13758	WBGene00016730	I	5020748	5023210	1
caenorhabditis_elegans_prjna13758	WBGene00008122	IV	13715906	13716379	-1	Tsp_05810		5414347	GL622785	5418315
caenorhabditis_elegans_prjna13758	WBGene00008124	IV	13740951	13742344	-1
caenorhabditis_elegans_prjna13758	WBGene00008125	IV	13745709	13745967	1
caenorhabditis_elegans_prjna13758	WBGene00008130	I	12960313	12961606	-1
caenorhabditis_elegans_prjna13758	WBGene00003948	I	12967216	12968280	-1	Tsp_09780		6276721	GL622789	6278023
caenorhabditis_elegans_prjna13758	WBGene00001234	I	12968921	12970238	1	Tsp_07767	eIF6	10620410	GL622785	10621420
caenorhabditis_elegans_prjna13758	WBGene00008136	II	11676306	11679197	1	Tsp_10156		823308	GL622789	825816
caenorhabditis_elegans_prjna13758	WBGene00008136	II	11676306	11679197	1	Tsp_10155		822423	GL622789	823217
caenorhabditis_elegans_prjna13758	WBGene00008137	II	11679091	11681068	-1	Tsp_11550		735716	GL622790	741190
caenorhabditis_elegans_prjna13758	WBGene00008137	II	11679091	11681068	-1	Tsp_12889		454	GL626579	1719
caenorhabditis_elegans_prjna13758	WBGene00008140	II	11696171	11705371	1	Tsp_10891	ERCC4	339563	GL623868	343050
caenorhabditis_elegans_prjna13758	WBGene00008153	IV	9972800	9973984	1
caenorhabditis_elegans_prjna13758	WBGene00008154	IV	9969400	9971200	1
caenorhabditis_elegans_prjna13758	WBGene00008147	IV	10001972	10003534	-1
caenorhabditis_elegans_prjna13758	WBGene00008151	IV	9980724	9982276	-1	Tsp_07494		1654442	GL622784	1657778
caenorhabditis_elegans_prjna13758	WBGene00008141	V	14666005	14667158	1
caenorhabditis_elegans_prjna13758	WBGene00000915	V	14684918	14688543	1	Tsp_03752		367161	GL622788	370645
caenorhabditis_elegans_prjna13758	WBGene00008145	V	14698957	14707601	1
caenorhabditis_elegans_prjna13758	WBGene00008165	II	11290843	11293606	-1	Tsp_12091	lmbrd2	384749	GL622791	387956
caenorhabditis_elegans_prjna13758	WBGene00016739	IV	7393221	7397555	1	Tsp_07959		1027152	GL622789	1030721
caenorhabditis_elegans_prjna13758	WBGene00016739	IV	7393221	7397555	1	Tsp_11958	Slc20a1	5504283	GL622792	5508416
caenorhabditis_elegans_prjna13758	WBGene00008173	III	9563437	9564510	-1
caenorhabditis_elegans_prjna13758	WBGene00008174	III	9564605	9566115	-1
caenorhabditis_elegans_prjna13758	WBGene00008169	III	9557448	9558563	-1
caenorhabditis_elegans_prjna13758	WBGene00008170	III	9558669	9559427	-1
caenorhabditis_elegans_prjna13758	WBGene00008172	III	9562336	9563335	-1
caenorhabditis_elegans_prjna13758	WBGene00016740	I	6916766	6917560	1
caenorhabditis_elegans_prjna13758	WBGene00016741	I	6915049	6916609	1
caenorhabditis_elegans_prjna13758	WBGene00016742	I	6889254	6891501	1
caenorhabditis_elegans_prjna13758	WBGene00016745	I	6924288	6925463	-1
caenorhabditis_elegans_prjna13758	WBGene00016750	I	6255035	6257791	1	Tsp_00826		3195493	GL622787	3196776
caenorhabditis_elegans_prjna13758	WBGene00016750	I	6255035	6257791	1	Tsp_00827		3194050	GL622787	3195371
caenorhabditis_elegans_prjna13758	WBGene00003059	I	6253701	6254947	1	Tsp_02451		9608276	GL622787	9611679
caenorhabditis_elegans_prjna13758	WBGene00016752	I	6234708	6235391	1
caenorhabditis_elegans_prjna13758	WBGene00016753	I	6265691	6269073	-1
caenorhabditis_elegans_prjna13758	WBGene00006689	I	6269561	6271541	-1
caenorhabditis_elegans_prjna13758	WBGene00008192	IV	17316710	17318246	1
caenorhabditis_elegans_prjna13758	WBGene00008196	IV	17331527	17332447	1
caenorhabditis_elegans_prjna13758	WBGene00008197	IV	17332573	17333645	1
caenorhabditis_elegans_prjna13758	WBGene00016765	IV	8654604	8656829	1
caenorhabditis_elegans_prjna13758	WBGene00008207	X	11982791	11983899	-1
caenorhabditis_elegans_prjna13758	WBGene00002080	IV	7916699	7924129	-1
caenorhabditis_elegans_prjna13758	WBGene00016791	IV	7915291	7916711	1
caenorhabditis_elegans_prjna13758	WBGene00016794	IV	7907093	7909474	-1
caenorhabditis_elegans_prjna13758	WBGene00008218	V	13310186	13312260	-1
caenorhabditis_elegans_prjna13758	WBGene00008219	V	13313575	13315812	1
caenorhabditis_elegans_prjna13758	WBGene00000250	V	13568850	13570030	1
caenorhabditis_elegans_prjna13758	WBGene00016799	III	8191817	8193847	1
caenorhabditis_elegans_prjna13758	WBGene00004187	III	8164373	8172702	1	Tsp_01598		6461911	GL622787	6471744
caenorhabditis_elegans_prjna13758	WBGene00004187	III	8164373	8172702	1	Tsp_01597		6473846	GL622787	6476539
caenorhabditis_elegans_prjna13758	WBGene00016803	III	8161449	8163383	-1
caenorhabditis_elegans_prjna13758	WBGene00016807	II	106189	107521	1
caenorhabditis_elegans_prjna13758	WBGene00016825	II	12301077	12302429	-1
caenorhabditis_elegans_prjna13758	WBGene00016826	II	12305543	12309714	-1
caenorhabditis_elegans_prjna13758	WBGene00016821	V	7600609	7601543	-1
caenorhabditis_elegans_prjna13758	WBGene00016823	V	7620504	7622061	-1
caenorhabditis_elegans_prjna13758	WBGene00016816	V	7587996	7594740	1
caenorhabditis_elegans_prjna13758	WBGene00016836	I	3881816	3888313	1
caenorhabditis_elegans_prjna13758	WBGene00016837	I	3877063	3880747	1	Tsp_03302		3697203	GL622785	3701072
caenorhabditis_elegans_prjna13758	WBGene00016839	I	3895764	3897478	-1
caenorhabditis_elegans_prjna13758	WBGene00003160	V	9541782	9544226	-1
caenorhabditis_elegans_prjna13758	WBGene00008236	V	9537672	9539738	-1
caenorhabditis_elegans_prjna13758	WBGene00008230	V	9531819	9534537	1
caenorhabditis_elegans_prjna13758	WBGene00008232	V	9536771	9537769	1
caenorhabditis_elegans_prjna13758	WBGene00016843	IV	7732329	7734210	1
caenorhabditis_elegans_prjna13758	WBGene00016844	IV	7728913	7730645	1	Tsp_06006		6212360	GL622785	6214429
caenorhabditis_elegans_prjna13758	WBGene00016844	IV	7728913	7730645	1	Tsp_06005		6214612	GL622785	6217088
caenorhabditis_elegans_prjna13758	WBGene00005400	V	3066228	3067497	1
caenorhabditis_elegans_prjna13758	WBGene00008243	V	9923285	9923936	1
caenorhabditis_elegans_prjna13758	WBGene00016873	X	1285209	1285863	1
caenorhabditis_elegans_prjna13758	WBGene00004815	IV	17163554	17164226	1
caenorhabditis_elegans_prjna13758	WBGene00004814	IV	17165191	17165855	-1
caenorhabditis_elegans_prjna13758	WBGene00005025	II	7010798	7012690	-1
caenorhabditis_elegans_prjna13758	WBGene00004917	V	11978518	11979970	-1	Tsp_05371		3064819	GL622792	3065388
caenorhabditis_elegans_prjna13758	WBGene00004501	V	11980502	11982450	-1	Tsp_09237		5058306	GL622788	5060511
caenorhabditis_elegans_prjna13758	WBGene00008259	V	11994295	11995858	1
caenorhabditis_elegans_prjna13758	WBGene00001834	V	14525389	14527411	1	Tsp_11412		7474289	GL622792	7477169
caenorhabditis_elegans_prjna13758	WBGene00007049	V	14534446	14536309	-1
caenorhabditis_elegans_prjna13758	WBGene00008272	IV	8966133	8967903	1
caenorhabditis_elegans_prjna13758	WBGene00002077	I	310981	314989	-1
caenorhabditis_elegans_prjna13758	WBGene00008281	IV	9019175	9020940	-1
caenorhabditis_elegans_prjna13758	WBGene00016907	I	1832897	1834764	1
caenorhabditis_elegans_prjna13758	WBGene00004337	V	14642739	14645979	-1	Tsp_06737		7662853	GL622785	7668574
caenorhabditis_elegans_prjna13758	WBGene00008312	I	8006650	8009118	1
caenorhabditis_elegans_prjna13758	WBGene00008313	I	8005127	8006448	-1
caenorhabditis_elegans_prjna13758	WBGene00008316	I	8019578	8020901	-1	Tsp_11052		2051118	GL622784	2054649
caenorhabditis_elegans_prjna13758	WBGene00008318	I	8024880	8026525	-1
caenorhabditis_elegans_prjna13758	WBGene00008338	V	11521653	11523384	1
caenorhabditis_elegans_prjna13758	WBGene00001599	I	6513928	6517507	1	Tsp_12124		535552	GL622790	536415
caenorhabditis_elegans_prjna13758	WBGene00001599	I	6513928	6517507	1	Tsp_15219		119	GL623636	662
caenorhabditis_elegans_prjna13758	WBGene00016946	I	6502167	6503920	-1
caenorhabditis_elegans_prjna13758	WBGene00016947	I	6511612	6513843	-1
caenorhabditis_elegans_prjna13758	WBGene00016942	I	6499537	6501410	1
caenorhabditis_elegans_prjna13758	WBGene00016944	I	6494216	6496109	1
caenorhabditis_elegans_prjna13758	WBGene00000937	I	6490716	6492727	-1	Tsp_09915	dbr1	422293	GL623393	423600
caenorhabditis_elegans_prjna13758	WBGene00007018	I	6492722	6494754	-1	Tsp_01368	MED18	5570577	GL622787	5571227
caenorhabditis_elegans_prjna13758	WBGene00006047	I	2562616	2563049	1
caenorhabditis_elegans_prjna13758	WBGene00016953	IV	5685287	5688273	1
caenorhabditis_elegans_prjna13758	WBGene00016954	IV	5676212	5678144	-1
caenorhabditis_elegans_prjna13758	WBGene00008343	V	13550520	13551810	-1
caenorhabditis_elegans_prjna13758	WBGene00008344	V	13551911	13553373	1
caenorhabditis_elegans_prjna13758	WBGene00008346	V	13560278	13561992	1
caenorhabditis_elegans_prjna13758	WBGene00016960	II	6601216	6603449	1	Tsp_04103	VPS33B	1976725	GL622788	1978601
caenorhabditis_elegans_prjna13758	WBGene00016960	II	6601216	6603449	1	Tsp_13297		9853	GL624545	10311
caenorhabditis_elegans_prjna13758	WBGene00016966	II	6592440	6594251	-1
caenorhabditis_elegans_prjna13758	WBGene00016967	II	6598349	6601119	-1
caenorhabditis_elegans_prjna13758	WBGene00016963	II	6579702	6581336	-1
caenorhabditis_elegans_prjna13758	WBGene00002045	II	6587577	6588679	-1	Tsp_04407	btf3l4	3340677	GL622788	3341156
caenorhabditis_elegans_prjna13758	WBGene00002045	II	6587577	6588679	-1	Tsp_14188	btf3l4	764	GL623344	1243
caenorhabditis_elegans_prjna13758	WBGene00016965	II	6591048	6592351	-1
caenorhabditis_elegans_prjna13758	WBGene00016971	II	6517188	6519845	-1
caenorhabditis_elegans_prjna13758	WBGene00016979	III	6331732	6335829	1	Tsp_01584		6514059	GL622787	6516157
caenorhabditis_elegans_prjna13758	WBGene00016979	III	6331732	6335829	1	Tsp_01583		6519313	GL622787	6522386
caenorhabditis_elegans_prjna13758	WBGene00016980	III	6321176	6324239	-1
caenorhabditis_elegans_prjna13758	WBGene00003927	V	5583161	5584343	-1	Tsp_13296.2		8	GL624545	1334
caenorhabditis_elegans_prjna13758	WBGene00003927	V	5583161	5584343	-1	Tsp_13296.1		3253	GL624545	5169
caenorhabditis_elegans_prjna13758	WBGene00003927	V	5583161	5584343	-1	Tsp_04102		1965842	GL622788	1975530
caenorhabditis_elegans_prjna13758	WBGene00016992	V	5595653	5596551	-1	Tsp_04522		277411	GL624340	279035
caenorhabditis_elegans_prjna13758	WBGene00017002	I	4579964	4580601	-1
caenorhabditis_elegans_prjna13758	WBGene00017003	I	4580692	4583810	-1	Tsp_10250		6750462	GL622792	6759147
caenorhabditis_elegans_prjna13758	WBGene00017003	I	4580692	4583810	-1	Tsp_10251		6759243	GL622792	6759915
caenorhabditis_elegans_prjna13758	WBGene00017004	I	4597914	4602666	-1
caenorhabditis_elegans_prjna13758	WBGene00017005	I	4604175	4605385	1
caenorhabditis_elegans_prjna13758	WBGene00005006	V	8126663	8129352	-1
caenorhabditis_elegans_prjna13758	WBGene00017025	I	3684783	3690192	1
caenorhabditis_elegans_prjna13758	WBGene00017026	I	3690181	3694021	-1
caenorhabditis_elegans_prjna13758	WBGene00008361	II	11582849	11588536	1
caenorhabditis_elegans_prjna13758	WBGene00017031	III	5535660	5543218	-1
caenorhabditis_elegans_prjna13758	WBGene00008362	IV	8926335	8930315	1
caenorhabditis_elegans_prjna13758	WBGene00008363	IV	8924161	8926112	-1
caenorhabditis_elegans_prjna13758	WBGene00008364	IV	8930442	8932791	1	Tsp_00380		1750203	GL622787	1751447
caenorhabditis_elegans_prjna13758	WBGene00008364	IV	8930442	8932791	1	Tsp_00381		1746280	GL622787	1749039
caenorhabditis_elegans_prjna13758	WBGene00008380	V	10804721	10806034	-1	Tsp_07315		865644	GL622784	869411
caenorhabditis_elegans_prjna13758	WBGene00006481	V	10806131	10807973	-1	Tsp_06269	PLRG1	10169502	GL622787	10171991
caenorhabditis_elegans_prjna13758	WBGene00003923	V	10770321	10771351	1	Tsp_01907		7843691	GL622787	7844750
caenorhabditis_elegans_prjna13758	WBGene00008371	V	10771451	10772832	1	Tsp_04513		256229	GL624340	257473
caenorhabditis_elegans_prjna13758	WBGene00008381	I	8463356	8469309	-1
caenorhabditis_elegans_prjna13758	WBGene00008383	I	8481152	8482538	1
caenorhabditis_elegans_prjna13758	WBGene00008384	I	8482759	8485694	-1
caenorhabditis_elegans_prjna13758	WBGene00008385	I	8487618	8490938	1
caenorhabditis_elegans_prjna13758	WBGene00008386	I	8491291	8495855	1	Tsp_07418	CDC5L	1204211	GL622784	1208389
caenorhabditis_elegans_prjna13758	WBGene00001864	V	14090719	14092435	1
caenorhabditis_elegans_prjna13758	WBGene00008399	I	7814972	7819410	1
caenorhabditis_elegans_prjna13758	WBGene00008400	I	7820831	7826433	1	Tsp_13512		1465	GL626788	3218
caenorhabditis_elegans_prjna13758	WBGene00017044	III	8145015	8145974	1	Tsp_05627	mrpl-18	4244919	GL622792	4245966
caenorhabditis_elegans_prjna13758	WBGene00008409	V	11825897	11827067	-1
caenorhabditis_elegans_prjna13758	WBGene00008410	V	11827306	11829370	1	Tsp_03160		3060130	GL622785	3065973
caenorhabditis_elegans_prjna13758	WBGene00017050	IV	7247543	7249437	1
caenorhabditis_elegans_prjna13758	WBGene00017053	IV	7227274	7228306	-1
caenorhabditis_elegans_prjna13758	WBGene00008413	I	7578512	7580833	-1
caenorhabditis_elegans_prjna13758	WBGene00004178	I	7585324	7588367	-1
caenorhabditis_elegans_prjna13758	WBGene00008417	I	7588580	7590565	1
caenorhabditis_elegans_prjna13758	WBGene00008418	I	7591288	7595198	1
caenorhabditis_elegans_prjna13758	WBGene00008422	III	10452719	10460551	-1
caenorhabditis_elegans_prjna13758	WBGene00008423	III	10468107	10469503	-1
caenorhabditis_elegans_prjna13758	WBGene00017056	II	2623402	2624530	1
caenorhabditis_elegans_prjna13758	WBGene00017057	II	2622780	2623767	1
caenorhabditis_elegans_prjna13758	WBGene00008433	II	10660225	10660959	-1
caenorhabditis_elegans_prjna13758	WBGene00017064	I	6625066	6626788	-1	Tsp_03970		1299342	GL622788	1300440
caenorhabditis_elegans_prjna13758	WBGene00006645	I	6616304	6618560	1
caenorhabditis_elegans_prjna13758	WBGene00017069	IV	8396493	8397950	1	Tsp_05774		5260531	GL622785	5261385
caenorhabditis_elegans_prjna13758	WBGene00017071	IV	8366539	8375371	1	Tsp_03950		1215067	GL622788	1217793
caenorhabditis_elegans_prjna13758	WBGene00017071	IV	8366539	8375371	1	Tsp_10814		31395	GL623868	32801
caenorhabditis_elegans_prjna13758	WBGene00017071	IV	8366539	8375371	1	Tsp_01057		4310767	GL622787	4313727
caenorhabditis_elegans_prjna13758	WBGene00005019	IV	8361089	8363370	1	Tsp_07365	UXS1	998848	GL622784	1004783
caenorhabditis_elegans_prjna13758	WBGene00017074	IV	8375720	8377698	-1
caenorhabditis_elegans_prjna13758	WBGene00005301	V	219932	222776	1
caenorhabditis_elegans_prjna13758	WBGene00017085	I	4132500	4135239	1	Tsp_12101		4759167	GL622788	4759659
caenorhabditis_elegans_prjna13758	WBGene00002696	I	4129469	4132292	-1
caenorhabditis_elegans_prjna13758	WBGene00008456	II	9588212	9589767	-1	Tsp_03649	eral1	5100617	GL622785	5102338
caenorhabditis_elegans_prjna13758	WBGene00008456	II	9588212	9589767	-1	Tsp_03641		5070861	GL622785	5072270
caenorhabditis_elegans_prjna13758	WBGene00006473	II	9591292	9592936	1	Tsp_01719		7098996	GL622787	7101349
caenorhabditis_elegans_prjna13758	WBGene00004050	II	9593037	9595128	1
caenorhabditis_elegans_prjna13758	WBGene00008457	II	9595224	9596598	1
caenorhabditis_elegans_prjna13758	WBGene00008458	II	9596701	9597528	1	Tsp_09539		827685	GL622792	830727
caenorhabditis_elegans_prjna13758	WBGene00008464	X	14250512	14252146	-1
caenorhabditis_elegans_prjna13758	WBGene00004322	III	4052807	4057976	-1	Tsp_00046		291103	GL622787	292849
caenorhabditis_elegans_prjna13758	WBGene00004322	III	4052807	4057976	-1	Tsp_14514		36	GL625389	1122
caenorhabditis_elegans_prjna13758	WBGene00001944	III	4059647	4060172	-1	Tsp_07554		1811190	GL622784	1811549
caenorhabditis_elegans_prjna13758	WBGene00001944	III	4059647	4060172	-1	Tsp_13713		1978	GL627003	2179
caenorhabditis_elegans_prjna13758	WBGene00001944	III	4059647	4060172	-1	Tsp_14200		502	GL627296	861
caenorhabditis_elegans_prjna13758	WBGene00001944	III	4059647	4060172	-1	Tsp_15676		26	GL624861	358
caenorhabditis_elegans_prjna13758	WBGene00001944	III	4059647	4060172	-1	Tsp_14173		746	GL627080	1105
caenorhabditis_elegans_prjna13758	WBGene00001944	III	4059647	4060172	-1	Tsp_15409		148	GL628791	507
caenorhabditis_elegans_prjna13758	WBGene00001944	III	4059647	4060172	-1	Tsp_13682		1156	GL629101	1341
caenorhabditis_elegans_prjna13758	WBGene00001944	III	4059647	4060172	-1	Tsp_07127		228155	GL622784	228526
caenorhabditis_elegans_prjna13758	WBGene00006038	IV	4994324	4994739	-1
caenorhabditis_elegans_prjna13758	WBGene00017112	IV	4977201	4978084	1
caenorhabditis_elegans_prjna13758	WBGene00017114	IV	4987702	4988642	-1
caenorhabditis_elegans_prjna13758	WBGene00023265	IV	4989065	4989717	-1
caenorhabditis_elegans_prjna13758	WBGene00017132	II	5421248	5422737	1
caenorhabditis_elegans_prjna13758	WBGene00017141	II	5411542	5412174	-1
caenorhabditis_elegans_prjna13758	WBGene00017142	II	5412722	5414052	-1
caenorhabditis_elegans_prjna13758	WBGene00017134	II	5414207	5415580	1
caenorhabditis_elegans_prjna13758	WBGene00003393	II	5399538	5405810	1	Tsp_01590		6493038	GL622787	6497729
caenorhabditis_elegans_prjna13758	WBGene00008487	IV	10473637	10475791	-1
caenorhabditis_elegans_prjna13758	WBGene00017165	III	5869685	5872396	-1
caenorhabditis_elegans_prjna13758	WBGene00017159	III	5878521	5879415	1	Tsp_03399		4080753	GL622785	4081272
caenorhabditis_elegans_prjna13758	WBGene00001057	III	5859308	5861907	1
caenorhabditis_elegans_prjna13758	WBGene00008508	IV	10227987	10231060	-1
caenorhabditis_elegans_prjna13758	WBGene00001609	III	9092241	9099698	1	Tsp_06168		7229241	GL622785	7239006
caenorhabditis_elegans_prjna13758	WBGene00017172	V	3138703	3139090	1
caenorhabditis_elegans_prjna13758	WBGene00017175	V	3137431	3138588	-1
caenorhabditis_elegans_prjna13758	WBGene00017179	II	3278987	3281686	1
caenorhabditis_elegans_prjna13758	WBGene00017177	X	4454120	4457304	1
caenorhabditis_elegans_prjna13758	WBGene00008529	I	8404547	8405955	-1
caenorhabditis_elegans_prjna13758	WBGene00004117	I	8416831	8425042	1	Tsp_07206		416135	GL622784	424507
caenorhabditis_elegans_prjna13758	WBGene00004117	I	8416831	8425042	1	Tsp_01129	SIN3B	4621350	GL622787	4625674
caenorhabditis_elegans_prjna13758	WBGene00004117	I	8416831	8425042	1	Tsp_12058		4952407	GL622792	4958010
caenorhabditis_elegans_prjna13758	WBGene00008531	I	8413253	8416195	1
caenorhabditis_elegans_prjna13758	WBGene00008535	IV	14196440	14198824	1
caenorhabditis_elegans_prjna13758	WBGene00008537	IV	14207564	14219159	1
caenorhabditis_elegans_prjna13758	WBGene00003791	II	11596767	11599809	-1
caenorhabditis_elegans_prjna13758	WBGene00008541	I	7352415	7353701	1
caenorhabditis_elegans_prjna13758	WBGene00005107	V	7635769	7636882	1
caenorhabditis_elegans_prjna13758	WBGene00008556	V	9460686	9462705	-1
caenorhabditis_elegans_prjna13758	WBGene00017210	II	2053919	2059072	-1	Tsp_06410	ZCCHC9	11092044	GL622787	11093416
caenorhabditis_elegans_prjna13758	WBGene00017213	II	2072221	2075830	-1
caenorhabditis_elegans_prjna13758	WBGene00017215	II	5437891	5440256	1
caenorhabditis_elegans_prjna13758	WBGene00008561	II	8807133	8808582	-1
caenorhabditis_elegans_prjna13758	WBGene00017235	IV	8666252	8667177	1
caenorhabditis_elegans_prjna13758	WBGene00017237	IV	8682239	8686610	-1	Tsp_07893		11197807	GL622785	11200528
caenorhabditis_elegans_prjna13758	WBGene00017238	IV	8686756	8687810	-1
caenorhabditis_elegans_prjna13758	WBGene00017239	I	6760416	6761435	1
caenorhabditis_elegans_prjna13758	WBGene00017261	V	5433392	5437066	1
caenorhabditis_elegans_prjna13758	WBGene00017263	V	5418044	5420067	-1
caenorhabditis_elegans_prjna13758	WBGene00002124	X	11294962	11296731	-1	Tsp_00312		1305355	GL622787	1307253
caenorhabditis_elegans_prjna13758	WBGene00002120	II	13835103	13835709	-1
caenorhabditis_elegans_prjna13758	WBGene00008580	IV	12408895	12410468	1
caenorhabditis_elegans_prjna13758	WBGene00008581	IV	12410467	12412219	1
caenorhabditis_elegans_prjna13758	WBGene00000592	V	14457475	14460136	1
caenorhabditis_elegans_prjna13758	WBGene00008590	V	14460624	14461132	1
caenorhabditis_elegans_prjna13758	WBGene00017277	II	5110029	5112232	1
caenorhabditis_elegans_prjna13758	WBGene00003462	II	5115102	5115335	-1
caenorhabditis_elegans_prjna13758	WBGene00005651	V	16896358	16897728	1
caenorhabditis_elegans_prjna13758	WBGene00005650	V	16894230	16895553	-1
caenorhabditis_elegans_prjna13758	WBGene00017280	II	2565275	2575930	1	Tsp_07711	USP39	10249880	GL622785	10251496
caenorhabditis_elegans_prjna13758	WBGene00008623	IV	13138991	13142354	-1
caenorhabditis_elegans_prjna13758	WBGene00003421	IV	13155228	13164056	1	Tsp_05453		3383721	GL622792	3385351
caenorhabditis_elegans_prjna13758	WBGene00017300	III	5557344	5564837	1	Tsp_08925		2427381	GL622784	2435787
caenorhabditis_elegans_prjna13758	WBGene00017313	V	7179172	7182853	1
caenorhabditis_elegans_prjna13758	WBGene00017316	V	7188332	7193662	-1	Tsp_03137		2930909	GL622785	2933057
caenorhabditis_elegans_prjna13758	WBGene00017317	V	7193766	7196137	-1
caenorhabditis_elegans_prjna13758	WBGene00008639	II	8144762	8147236	1	Tsp_04815		1149156	GL624340	1151570
caenorhabditis_elegans_prjna13758	WBGene00008641	II	8158349	8159925	1
caenorhabditis_elegans_prjna13758	WBGene00001281	II	8159865	8162170	-1	Tsp_06453		10917593	GL622787	10919905
caenorhabditis_elegans_prjna13758	WBGene00004510	II	8162465	8168644	1	Tsp_01517		6147594	GL622787	6152275
caenorhabditis_elegans_prjna13758	WBGene00002241	V	12032257	12040873	-1
caenorhabditis_elegans_prjna13758	WBGene00008645	V	12041556	12045347	1
caenorhabditis_elegans_prjna13758	WBGene00001095	V	12048745	12052182	1
caenorhabditis_elegans_prjna13758	WBGene00003134	III	475454	482322	1	Tsp_13280		1755	GL623464	3140
caenorhabditis_elegans_prjna13758	WBGene00003134	III	475454	482322	1	Tsp_06918	APC8	8476673	GL622785	8478121
caenorhabditis_elegans_prjna13758	WBGene00003134	III	475454	482322	1	Tsp_13279		333	GL623464	1722
caenorhabditis_elegans_prjna13758	WBGene00008648	I	8435958	8438638	-1
caenorhabditis_elegans_prjna13758	WBGene00008649	I	8439756	8440470	-1
caenorhabditis_elegans_prjna13758	WBGene00017352	II	7120589	7121782	-1
caenorhabditis_elegans_prjna13758	WBGene00017347	II	7111978	7112982	1	Tsp_04233		2531948	GL622788	2532675
caenorhabditis_elegans_prjna13758	WBGene00017347	II	7111978	7112982	1	Tsp_13341		3744	GL628955	4656
caenorhabditis_elegans_prjna13758	WBGene00017349	II	7101218	7105030	-1	Tsp_11771		5078226	GL622789	5082133
caenorhabditis_elegans_prjna13758	WBGene00017354	III	8312719	8314286	1
caenorhabditis_elegans_prjna13758	WBGene00017355	III	8311007	8312585	1
caenorhabditis_elegans_prjna13758	WBGene00017356	III	8308538	8309806	1
caenorhabditis_elegans_prjna13758	WBGene00017357	III	8307592	8308448	1
caenorhabditis_elegans_prjna13758	WBGene00004726	III	8314349	8318588	-1
caenorhabditis_elegans_prjna13758	WBGene00008658	III	4632407	4634428	1
caenorhabditis_elegans_prjna13758	WBGene00008659	III	4628465	4631131	1
caenorhabditis_elegans_prjna13758	WBGene00008660	III	4635330	4637490	1
caenorhabditis_elegans_prjna13758	WBGene00017365	V	7327135	7327755	1
caenorhabditis_elegans_prjna13758	WBGene00006497	II	4710277	4713690	1	Tsp_03479		4420915	GL622785	4425684
caenorhabditis_elegans_prjna13758	WBGene00006817	II	4702069	4703219	1	Tsp_02412		9731931	GL622787	9733118
caenorhabditis_elegans_prjna13758	WBGene00004737	II	4698721	4700994	1	Tsp_10008		17546	GL622789	19771
caenorhabditis_elegans_prjna13758	WBGene00004737	II	4698721	4700994	1	Tsp_10009		20161	GL622789	24646
caenorhabditis_elegans_prjna13758	WBGene00004461	II	4696419	4698427	-1	Tsp_10788		3215559	GL622789	3218916
caenorhabditis_elegans_prjna13758	WBGene00017372	II	4703254	4706498	-1
caenorhabditis_elegans_prjna13758	WBGene00008661	I	10019643	10021069	1
caenorhabditis_elegans_prjna13758	WBGene00008662	I	10021702	10022872	-1
caenorhabditis_elegans_prjna13758	WBGene00003803	I	10026188	10030058	1	Tsp_06746		7696941	GL622785	7700732
caenorhabditis_elegans_prjna13758	WBGene00008665	I	10030174	10046760	1	Tsp_01641		6648533	GL622787	6649795
caenorhabditis_elegans_prjna13758	WBGene00008682	IV	12079463	12084362	1
caenorhabditis_elegans_prjna13758	WBGene00008683	IV	12084478	12085320	1	Tsp_13057		3232	GL627484	3550
caenorhabditis_elegans_prjna13758	WBGene00008683	IV	12084478	12085320	1	Tsp_12601		2217	GL625084	3045
caenorhabditis_elegans_prjna13758	WBGene00008683	IV	12084478	12085320	1	Tsp_07705	Sf3a2	10275043	GL622785	10276553
caenorhabditis_elegans_prjna13758	WBGene00008684	IV	12089247	12092213	-1	Tsp_06575		11851450	GL622787	11853175
caenorhabditis_elegans_prjna13758	WBGene00008684	IV	12089247	12092213	-1	Tsp_06574	Nudcd2	11853470	GL622787	11854094
caenorhabditis_elegans_prjna13758	WBGene00008686	IV	12094372	12096692	1	Tsp_06127		6924891	GL622785	6927569
caenorhabditis_elegans_prjna13758	WBGene00008710	IV	17457834	17461272	-1
caenorhabditis_elegans_prjna13758	WBGene00017384	II	4860594	4861696	1
caenorhabditis_elegans_prjna13758	WBGene00017386	II	4860064	4860411	-1
caenorhabditis_elegans_prjna13758	WBGene00017387	II	4862318	4863457	-1
caenorhabditis_elegans_prjna13758	WBGene00017392	II	5491111	5493192	1
caenorhabditis_elegans_prjna13758	WBGene00017397	II	5498851	5501409	-1
caenorhabditis_elegans_prjna13758	WBGene00017402	II	3741884	3742509	1
caenorhabditis_elegans_prjna13758	WBGene00017408	II	3751261	3752284	-1
caenorhabditis_elegans_prjna13758	WBGene00008720	IV	11585224	11588321	1
caenorhabditis_elegans_prjna13758	WBGene00006406	IV	11570500	11578699	1	Tsp_03919		1086385	GL622788	1087934
caenorhabditis_elegans_prjna13758	WBGene00008722	IV	11558737	11561891	-1	Tsp_13254		39	GL628818	2609
caenorhabditis_elegans_prjna13758	WBGene00008722	IV	11558737	11561891	-1	Tsp_02376	pold2	9865544	GL622787	9867840
caenorhabditis_elegans_prjna13758	WBGene00017413	V	4398635	4400218	-1
caenorhabditis_elegans_prjna13758	WBGene00017415	V	4402749	4404530	-1
caenorhabditis_elegans_prjna13758	WBGene00008724	V	16376239	16377949	-1
caenorhabditis_elegans_prjna13758	WBGene00008725	V	16382167	16383829	-1
caenorhabditis_elegans_prjna13758	WBGene00004817	V	16389241	16389865	-1
caenorhabditis_elegans_prjna13758	WBGene00008729	IV	10422610	10424635	-1	Tsp_06200		7121182	GL622785	7124403
caenorhabditis_elegans_prjna13758	WBGene00017424	X	596314	599553	-1
caenorhabditis_elegans_prjna13758	WBGene00008740	II	11726814	11728541	1
caenorhabditis_elegans_prjna13758	WBGene00008743	II	11707452	11709587	-1
caenorhabditis_elegans_prjna13758	WBGene00008750	IV	10864331	10873632	1
caenorhabditis_elegans_prjna13758	WBGene00008754	IV	10882972	10884363	-1
caenorhabditis_elegans_prjna13758	WBGene00008772	IV	14633099	14634405	1
caenorhabditis_elegans_prjna13758	WBGene00008766	I	7303300	7304690	-1
caenorhabditis_elegans_prjna13758	WBGene00017435	II	6270370	6274005	1	Tsp_00117		409474	GL622787	414216
caenorhabditis_elegans_prjna13758	WBGene00017441	II	6265612	6268083	-1
caenorhabditis_elegans_prjna13758	WBGene00008780	I	9271443	9278689	-1
caenorhabditis_elegans_prjna13758	WBGene00008781	I	9280963	9286577	-1
caenorhabditis_elegans_prjna13758	WBGene00017450	II	3360221	3361354	1
caenorhabditis_elegans_prjna13758	WBGene00017459	II	3341268	3342104	-1
caenorhabditis_elegans_prjna13758	WBGene00017452	II	3350252	3358981	1
caenorhabditis_elegans_prjna13758	WBGene00017456	II	3347574	3349870	-1
caenorhabditis_elegans_prjna13758	WBGene00008789	V	14291910	14293712	-1
caenorhabditis_elegans_prjna13758	WBGene00008801	II	8435347	8437135	-1
caenorhabditis_elegans_prjna13758	WBGene00008802	II	8429959	8432054	-1
caenorhabditis_elegans_prjna13758	WBGene00008811	III	13028393	13029708	-1
caenorhabditis_elegans_prjna13758	WBGene00008821	V	16049492	16051554	1
caenorhabditis_elegans_prjna13758	WBGene00008822	V	16051923	16053510	-1
caenorhabditis_elegans_prjna13758	WBGene00008823	V	16053900	16055072	-1
caenorhabditis_elegans_prjna13758	WBGene00008824	V	16055806	16057054	-1
caenorhabditis_elegans_prjna13758	WBGene00008825	V	16057322	16058892	-1
caenorhabditis_elegans_prjna13758	WBGene00008828	V	16067947	16068763	-1
caenorhabditis_elegans_prjna13758	WBGene00008844	II	12484544	12485160	-1
caenorhabditis_elegans_prjna13758	WBGene00008838	II	12462418	12464078	1
caenorhabditis_elegans_prjna13758	WBGene00008848	V	13002317	13006987	1
caenorhabditis_elegans_prjna13758	WBGene00008854	I	11565238	11570803	1
caenorhabditis_elegans_prjna13758	WBGene00000274	II	13200165	13215701	1	Tsp_00622		2434038	GL622787	2440613
caenorhabditis_elegans_prjna13758	WBGene00000144	V	10425362	10426399	-1	Tsp_11955		5497175	GL622792	5497997
caenorhabditis_elegans_prjna13758	WBGene00000144	V	10425362	10426399	-1	Tsp_11890		5601643	GL622792	5605498
caenorhabditis_elegans_prjna13758	WBGene00008870	I	12157151	12158712	1
caenorhabditis_elegans_prjna13758	WBGene00008877	I	9390829	9393095	-1	Tsp_12314		4972	GL629016	7462
caenorhabditis_elegans_prjna13758	WBGene00008877	I	9390829	9393095	-1	Tsp_05733		5136740	GL622785	5137657
caenorhabditis_elegans_prjna13758	WBGene00008877	I	9390829	9393095	-1	Tsp_12406.2		1893	GL623659	4067
caenorhabditis_elegans_prjna13758	WBGene00008877	I	9390829	9393095	-1	Tsp_12406.1		1089	GL623659	1582
caenorhabditis_elegans_prjna13758	WBGene00004684	I	8358254	8363858	-1
caenorhabditis_elegans_prjna13758	WBGene00008887	I	8363954	8369917	-1	Tsp_03497		4513535	GL622785	4517189
caenorhabditis_elegans_prjna13758	WBGene00017532	X	4647526	4649197	-1	Tsp_07410	SLC29A1	1218333	GL622784	1221797
caenorhabditis_elegans_prjna13758	WBGene00008904	X	12321657	12322993	1
caenorhabditis_elegans_prjna13758	WBGene00017533	V	6116521	6117849	1
caenorhabditis_elegans_prjna13758	WBGene00017534	V	6107828	6114856	1	Tsp_07622		9924704	GL622785	9928000
caenorhabditis_elegans_prjna13758	WBGene00008921	V	10961722	10965562	-1	Tsp_06946		8591211	GL622785	8595323
caenorhabditis_elegans_prjna13758	WBGene00008921	V	10961722	10965562	-1	Tsp_12651		9284976	GL622785	9288009
caenorhabditis_elegans_prjna13758	WBGene00008918	V	10956910	10958821	-1	Tsp_12474.1		829	GL625490	2017
caenorhabditis_elegans_prjna13758	WBGene00008918	V	10956910	10958821	-1	Tsp_09346		5496482	GL622788	5500792
caenorhabditis_elegans_prjna13758	WBGene00008918	V	10956910	10958821	-1	Tsp_12474.2		3905	GL625490	4269
caenorhabditis_elegans_prjna13758	WBGene00008910	III	4731938	4734034	1
caenorhabditis_elegans_prjna13758	WBGene00006661	III	4742968	4744649	1
caenorhabditis_elegans_prjna13758	WBGene00017542	IV	8345818	8346546	1
caenorhabditis_elegans_prjna13758	WBGene00008928	X	13125976	13126520	-1
caenorhabditis_elegans_prjna13758	WBGene00017545	II	7684889	7689689	1
caenorhabditis_elegans_prjna13758	WBGene00003012	II	7682198	7684760	1
caenorhabditis_elegans_prjna13758	WBGene00017546	II	7664582	7667110	1	Tsp_07124.2		151434	GL622784	154416
caenorhabditis_elegans_prjna13758	WBGene00017546	II	7664582	7667110	1	Tsp_07124.1		167984	GL622784	170125
caenorhabditis_elegans_prjna13758	WBGene00017548	II	7662706	7663754	-1
caenorhabditis_elegans_prjna13758	WBGene00004242	II	13039790	13043476	-1
caenorhabditis_elegans_prjna13758	WBGene00008933	II	13043951	13045975	1
caenorhabditis_elegans_prjna13758	WBGene00017550	II	3416838	3420671	1
caenorhabditis_elegans_prjna13758	WBGene00017553	II	3403835	3406838	1
caenorhabditis_elegans_prjna13758	WBGene00017554	II	3395821	3399303	-1
caenorhabditis_elegans_prjna13758	WBGene00017556	II	3411425	3414469	-1
caenorhabditis_elegans_prjna13758	WBGene00006944	II	6554977	6559267	1
caenorhabditis_elegans_prjna13758	WBGene00007050	II	6536380	6554846	1	Tsp_09914		411585	GL623393	421962
caenorhabditis_elegans_prjna13758	WBGene00017559	II	6563796	6565154	-1
caenorhabditis_elegans_prjna13758	WBGene00005055	II	6574378	6575747	-1
caenorhabditis_elegans_prjna13758	WBGene00004738	V	12763945	12767933	1	Tsp_06183		7183340	GL622785	7189114
caenorhabditis_elegans_prjna13758	WBGene00004750	II	3671908	3673593	-1
caenorhabditis_elegans_prjna13758	WBGene00008949	IV	12327190	12328718	1
caenorhabditis_elegans_prjna13758	WBGene00008950	IV	12337577	12340436	1
caenorhabditis_elegans_prjna13758	WBGene00017595	IV	4595958	4596732	1
caenorhabditis_elegans_prjna13758	WBGene00017605	V	7571950	7575715	-1	Tsp_03550		4698106	GL622785	4705469
caenorhabditis_elegans_prjna13758	WBGene00008959	X	12365688	12367255	1
caenorhabditis_elegans_prjna13758	WBGene00017620	V	7049434	7051311	-1
caenorhabditis_elegans_prjna13758	WBGene00004051	IV	8746252	8752676	1
caenorhabditis_elegans_prjna13758	WBGene00008976	X	14982140	14982804	-1	Tsp_09335		5458150	GL622788	5459221
caenorhabditis_elegans_prjna13758	WBGene00017641	IV	7957580	7962129	1
caenorhabditis_elegans_prjna13758	WBGene00017642	IV	7948643	7953548	1	Tsp_05363		3087341	GL622792	3098224
caenorhabditis_elegans_prjna13758	WBGene00017643	IV	7943617	7946819	-1
caenorhabditis_elegans_prjna13758	WBGene00017633	V	8190699	8192050	1
caenorhabditis_elegans_prjna13758	WBGene00017636	V	8159929	8161643	1
caenorhabditis_elegans_prjna13758	WBGene00008981	V	17458533	17460161	-1
caenorhabditis_elegans_prjna13758	WBGene00003777	I	7926623	7934577	-1	Tsp_01842		7505262	GL622787	7520561
caenorhabditis_elegans_prjna13758	WBGene00017646	III	6589377	6592175	-1	Tsp_10942		9447722	GL622785	9449933
caenorhabditis_elegans_prjna13758	WBGene00017647	III	6608622	6610455	1
caenorhabditis_elegans_prjna13758	WBGene00008994	V	15536620	15537986	1
caenorhabditis_elegans_prjna13758	WBGene00004324	I	7280552	7282871	-1
caenorhabditis_elegans_prjna13758	WBGene00009004	I	7282964	7283818	-1
caenorhabditis_elegans_prjna13758	WBGene00009006	IV	8725722	8728060	1	Tsp_14771		13	GL628150	1434
caenorhabditis_elegans_prjna13758	WBGene00009006	IV	8725722	8728060	1	Tsp_06157		7063504	GL622785	7068278
caenorhabditis_elegans_prjna13758	WBGene00009007	IV	8728139	8730510	1	Tsp_04332		2974022	GL622788	2976272
caenorhabditis_elegans_prjna13758	WBGene00009011	IV	8740140	8741388	-1
caenorhabditis_elegans_prjna13758	WBGene00009015	V	19264597	19269661	1
caenorhabditis_elegans_prjna13758	WBGene00009016	V	19258483	19262449	-1
caenorhabditis_elegans_prjna13758	WBGene00009017	V	19257583	19257753	-1
caenorhabditis_elegans_prjna13758	WBGene00017670	X	1350553	1356482	-1
caenorhabditis_elegans_prjna13758	WBGene00017672	I	4903437	4905138	1
caenorhabditis_elegans_prjna13758	WBGene00017673	I	4901918	4903264	1	Tsp_01153	icmt	4502606	GL622787	4505263
caenorhabditis_elegans_prjna13758	WBGene00017674	I	4896003	4897541	1
caenorhabditis_elegans_prjna13758	WBGene00017679	V	8265202	8266385	-1
caenorhabditis_elegans_prjna13758	WBGene00003410	X	9884278	9889704	1
caenorhabditis_elegans_prjna13758	WBGene00017683	II	6097830	6099663	1	Tsp_15201		795	GL626006	1163
caenorhabditis_elegans_prjna13758	WBGene00004209	II	6083628	6085858	-1
caenorhabditis_elegans_prjna13758	WBGene00001402	II	6088866	6091480	-1
caenorhabditis_elegans_prjna13758	WBGene00009028	V	16227127	16229893	-1
caenorhabditis_elegans_prjna13758	WBGene00009031	V	16237523	16238824	1
caenorhabditis_elegans_prjna13758	WBGene00009035	IV	11410228	11413001	1	Tsp_02495		133746	GL622785	138843
caenorhabditis_elegans_prjna13758	WBGene00009039	IV	11422711	11425251	-1
caenorhabditis_elegans_prjna13758	WBGene00001358	II	8444307	8445177	1	Tsp_10876		277277	GL623868	277783
caenorhabditis_elegans_prjna13758	WBGene00009043	II	8453254	8454613	-1
caenorhabditis_elegans_prjna13758	WBGene00006994	II	8457818	8464517	1	Tsp_01109		4426992	GL622787	4430371
caenorhabditis_elegans_prjna13758	WBGene00001688	III	8628926	8630776	1
caenorhabditis_elegans_prjna13758	WBGene00017696	III	8626291	8628571	-1
caenorhabditis_elegans_prjna13758	WBGene00002198	I	7075918	7079566	-1	Tsp_12784		3362	GL624279	5110
caenorhabditis_elegans_prjna13758	WBGene00002198	I	7075918	7079566	-1	Tsp_06641	Fps85D	11546255	GL622787	11548147
caenorhabditis_elegans_prjna13758	WBGene00002198	I	7075918	7079566	-1	Tsp_11870		113432	GL622790	117458
caenorhabditis_elegans_prjna13758	WBGene00003815	I	7088030	7090062	-1	Tsp_06285		10294625	GL622787	10300413
caenorhabditis_elegans_prjna13758	WBGene00009052	I	7095486	7098406	1
caenorhabditis_elegans_prjna13758	WBGene00009054	I	7099810	7101775	1
caenorhabditis_elegans_prjna13758	WBGene00017708	II	2638392	2639353	1
caenorhabditis_elegans_prjna13758	WBGene00002125	X	5996156	5998243	1	Tsp_00791	inx	3163819	GL622787	3165960
caenorhabditis_elegans_prjna13758	WBGene00002125	X	5996156	5998243	1	Tsp_01271	unc-7	5023274	GL622787	5024989
caenorhabditis_elegans_prjna13758	WBGene00009079	V	14429165	14430410	1
caenorhabditis_elegans_prjna13758	WBGene00006465	V	14447629	14449587	1	Tsp_08562		4705074	GL622788	4707939
caenorhabditis_elegans_prjna13758	WBGene00006465	V	14447629	14449587	1	Tsp_12506.1		6445	GL626364	8968
caenorhabditis_elegans_prjna13758	WBGene00009084	V	14449697	14452971	1	Tsp_03554		4710431	GL622785	4714022
caenorhabditis_elegans_prjna13758	WBGene00000257	V	14453305	14456998	-1
caenorhabditis_elegans_prjna13758	WBGene00009078	IV	9146337	9146869	-1	Tsp_06400		11141020	GL622787	11142227
caenorhabditis_elegans_prjna13758	WBGene00000121	IV	9147468	9148579	1
caenorhabditis_elegans_prjna13758	WBGene00009075	IV	9150491	9152043	1
caenorhabditis_elegans_prjna13758	WBGene00017731	I	2446740	2448369	1
caenorhabditis_elegans_prjna13758	WBGene00017733	I	2434004	2435708	1
caenorhabditis_elegans_prjna13758	WBGene00017736	I	2422334	2425185	-1
caenorhabditis_elegans_prjna13758	WBGene00017737	I	2429675	2432601	-1
caenorhabditis_elegans_prjna13758	WBGene00017738	I	2432570	2433755	-1	Tsp_10710		2870115	GL622789	2872807
caenorhabditis_elegans_prjna13758	WBGene00017742	II	43854	44981	1	Tsp_00857	Nfyc	3472922	GL622787	3475612
caenorhabditis_elegans_prjna13758	WBGene00017746	II	30061	31584	-1	Tsp_05332		2840603	GL622792	2841670
caenorhabditis_elegans_prjna13758	WBGene00004504	II	42181	46216	-1	Tsp_02519		268193	GL622785	271290
caenorhabditis_elegans_prjna13758	WBGene00004503	III	6489793	6491282	1	Tsp_05241		2327589	GL622792	2329779
caenorhabditis_elegans_prjna13758	WBGene00017757	III	911261	912243	1	Tsp_01392		5845574	GL622787	5848374
caenorhabditis_elegans_prjna13758	WBGene00017757	III	911261	912243	1	Tsp_09562		1033523	GL622792	1036030
caenorhabditis_elegans_prjna13758	WBGene00009103	V	9580041	9582644	-1	Tsp_11259		104837	GL624139	107891
caenorhabditis_elegans_prjna13758	WBGene00017774	III	5958722	5962322	1
caenorhabditis_elegans_prjna13758	WBGene00017776	III	5943833	5946124	-1
caenorhabditis_elegans_prjna13758	WBGene00009113	I	10418234	10421858	-1
caenorhabditis_elegans_prjna13758	WBGene00009115	III	4508855	4512162	1
caenorhabditis_elegans_prjna13758	WBGene00017797	V	8570311	8581397	1	Tsp_00894		3305668	GL622787	3308802
caenorhabditis_elegans_prjna13758	WBGene00017797	V	8570311	8581397	1	Tsp_00135		333673	GL622787	336825
caenorhabditis_elegans_prjna13758	WBGene00017800	V	8565275	8570077	-1
caenorhabditis_elegans_prjna13758	WBGene00009123	I	10570079	10571916	1
caenorhabditis_elegans_prjna13758	WBGene00009124	I	10571954	10577135	1	Tsp_03837		736434	GL622788	741493
caenorhabditis_elegans_prjna13758	WBGene00009118	I	10551972	10553035	1	Tsp_07510		1596784	GL622784	1597125
caenorhabditis_elegans_prjna13758	WBGene00006720	I	10562968	10564914	1	Tsp_03600		4927475	GL622785	4928458
caenorhabditis_elegans_prjna13758	WBGene00003926	I	10566350	10567300	1	Tsp_05973		6082260	GL622785	6084946
caenorhabditis_elegans_prjna13758	WBGene00009125	I	9179941	9181119	-1
caenorhabditis_elegans_prjna13758	WBGene00009127	I	9159938	9163261	-1
caenorhabditis_elegans_prjna13758	WBGene00009128	I	9159015	9159757	-1
caenorhabditis_elegans_prjna13758	WBGene00009129	I	9155513	9157411	1
caenorhabditis_elegans_prjna13758	WBGene00009131	IV	9930899	9932240	-1	Tsp_05742		5205401	GL622785	5206086
caenorhabditis_elegans_prjna13758	WBGene00009132	IV	9932235	9933879	1	Tsp_06225		10025740	GL622787	10027485
caenorhabditis_elegans_prjna13758	WBGene00017801	III	4850507	4851910	1
caenorhabditis_elegans_prjna13758	WBGene00017808	III	4830010	4830349	-1
caenorhabditis_elegans_prjna13758	WBGene00017802	III	4826906	4828970	1
caenorhabditis_elegans_prjna13758	WBGene00009141	I	7642270	7643328	-1	Tsp_00254		974785	GL622787	975670
caenorhabditis_elegans_prjna13758	WBGene00001214	I	7650418	7656336	-1
caenorhabditis_elegans_prjna13758	WBGene00009143	I	7667729	7669900	1
caenorhabditis_elegans_prjna13758	WBGene00009145	I	7674734	7676127	-1	Tsp_03692		146971	GL622788	148736
caenorhabditis_elegans_prjna13758	WBGene00017815	I	6326875	6327972	1
caenorhabditis_elegans_prjna13758	WBGene00002073	I	6315233	6317267	1
caenorhabditis_elegans_prjna13758	WBGene00017817	I	6309114	6310781	1	Tsp_01125		4353662	GL622787	4354442
caenorhabditis_elegans_prjna13758	WBGene00005171	I	6312750	6314624	1
caenorhabditis_elegans_prjna13758	WBGene00001606	IV	17272231	17273652	-1	Tsp_04186		2339558	GL622788	2341969
caenorhabditis_elegans_prjna13758	WBGene00002005	IV	17278959	17281330	1	Tsp_06317		10497528	GL622787	10504226
caenorhabditis_elegans_prjna13758	WBGene00017818	V	7981545	7982662	1
caenorhabditis_elegans_prjna13758	WBGene00009149	V	16424854	16429603	-1
caenorhabditis_elegans_prjna13758	WBGene00006375	V	16405751	16407699	1
caenorhabditis_elegans_prjna13758	WBGene00009163	I	9781338	9785722	-1	Tsp_06192		7144005	GL622785	7149790
caenorhabditis_elegans_prjna13758	WBGene00009159	I	9771061	9772565	-1
caenorhabditis_elegans_prjna13758	WBGene00009160	I	9768836	9771068	-1	Tsp_12784		3362	GL624279	5110
caenorhabditis_elegans_prjna13758	WBGene00009160	I	9768836	9771068	-1	Tsp_06641	Fps85D	11546255	GL622787	11548147
caenorhabditis_elegans_prjna13758	WBGene00009160	I	9768836	9771068	-1	Tsp_11870		113432	GL622790	117458
caenorhabditis_elegans_prjna13758	WBGene00006528	I	9785778	9787624	-1	Tsp_00847		3510190	GL622787	3512482
caenorhabditis_elegans_prjna13758	WBGene00006528	I	9785778	9787624	-1	Tsp_08041		1530059	GL622789	1533849
caenorhabditis_elegans_prjna13758	WBGene00006528	I	9785778	9787624	-1	Tsp_01451		5594555	GL622787	5596616
caenorhabditis_elegans_prjna13758	WBGene00006528	I	9785778	9787624	-1	Tsp_01450		5597665	GL622787	5599719
caenorhabditis_elegans_prjna13758	WBGene00017833	V	5837572	5838613	-1
caenorhabditis_elegans_prjna13758	WBGene00002637	V	5826833	5832866	1	Tsp_01163		4736419	GL622787	4746481
caenorhabditis_elegans_prjna13758	WBGene00017825	III	4912207	4914133	1	Tsp_03313		3747890	GL622785	3749025
caenorhabditis_elegans_prjna13758	WBGene00004679	III	4914096	4917129	-1	Tsp_00564		2185971	GL622787	2192857
caenorhabditis_elegans_prjna13758	WBGene00017830	III	4917104	4918008	-1	Tsp_00326	rpb-8	1256879	GL622787	1257391
caenorhabditis_elegans_prjna13758	WBGene00005012	III	4911226	4911992	1
caenorhabditis_elegans_prjna13758	WBGene00017828	III	4891609	4893409	-1
caenorhabditis_elegans_prjna13758	WBGene00003598	III	4894647	4899085	-1	Tsp_00130		350877	GL622787	354980
caenorhabditis_elegans_prjna13758	WBGene00005011	III	4903997	4905473	-1
caenorhabditis_elegans_prjna13758	WBGene00017837	II	4791620	4795643	1
caenorhabditis_elegans_prjna13758	WBGene00003424	II	4785861	4786316	-1	Tsp_00768		3048065	GL622787	3048698
caenorhabditis_elegans_prjna13758	WBGene00003424	II	4785861	4786316	-1	Tsp_00761		3076026	GL622787	3077501
caenorhabditis_elegans_prjna13758	WBGene00003424	II	4785861	4786316	-1	Tsp_00756		2908432	GL622787	2908941
caenorhabditis_elegans_prjna13758	WBGene00003424	II	4785861	4786316	-1	Tsp_13425		585	GL623126	965
caenorhabditis_elegans_prjna13758	WBGene00003424	II	4785861	4786316	-1	Tsp_13917		820	GL624354	1264
caenorhabditis_elegans_prjna13758	WBGene00017843	V	4975485	4977502	1
caenorhabditis_elegans_prjna13758	WBGene00009179	II	14389236	14390116	-1
caenorhabditis_elegans_prjna13758	WBGene00009182	II	14408612	14410836	1
caenorhabditis_elegans_prjna13758	WBGene00009173	I	9287437	9289770	1
caenorhabditis_elegans_prjna13758	WBGene00009176	I	9305751	9306844	-1
caenorhabditis_elegans_prjna13758	WBGene00017851	I	5434805	5435785	1
caenorhabditis_elegans_prjna13758	WBGene00017855	I	5421313	5428457	-1	Tsp_08374		3994427	GL622788	3996569
caenorhabditis_elegans_prjna13758	WBGene00017855	I	5421313	5428457	-1	Tsp_12801		158	GL625223	2853
caenorhabditis_elegans_prjna13758	WBGene00009185	IV	9589795	9592529	-1
caenorhabditis_elegans_prjna13758	WBGene00009186	IV	9587100	9588834	-1
caenorhabditis_elegans_prjna13758	WBGene00009188	I	7704565	7707049	-1
caenorhabditis_elegans_prjna13758	WBGene00009193	II	10141457	10144192	-1
caenorhabditis_elegans_prjna13758	WBGene00017869	II	825848	827500	1
caenorhabditis_elegans_prjna13758	WBGene00017872	II	844274	845085	1
caenorhabditis_elegans_prjna13758	WBGene00017895	II	5921967	5924838	1
caenorhabditis_elegans_prjna13758	WBGene00017886	I	4926592	4928840	1
caenorhabditis_elegans_prjna13758	WBGene00001860	I	4951570	4957667	-1
caenorhabditis_elegans_prjna13758	WBGene00009200	V	12450807	12453336	1
caenorhabditis_elegans_prjna13758	WBGene00009203	II	8594190	8596294	1
caenorhabditis_elegans_prjna13758	WBGene00000773	II	8600435	8602479	-1	Tsp_09726		5956901	GL622789	5960109
caenorhabditis_elegans_prjna13758	WBGene00006307	II	8603846	8606744	1
caenorhabditis_elegans_prjna13758	WBGene00017902	IV	4566018	4567443	-1
caenorhabditis_elegans_prjna13758	WBGene00003079	V	15569935	15570742	1	Tsp_12500		7983	GL626231	8261
caenorhabditis_elegans_prjna13758	WBGene00003079	V	15569935	15570742	1	Tsp_07532		1764319	GL622784	1764597
caenorhabditis_elegans_prjna13758	WBGene00003079	V	15569935	15570742	1	Tsp_12470		11449	GL625295	11637
caenorhabditis_elegans_prjna13758	WBGene00009223	V	15574098	15575403	-1
caenorhabditis_elegans_prjna13758	WBGene00006446	V	15575498	15577443	-1	Tsp_03879		913303	GL622788	917445
caenorhabditis_elegans_prjna13758	WBGene00009238	V	10746548	10747337	-1	Tsp_03801	selt2	591187	GL622788	592064
caenorhabditis_elegans_prjna13758	WBGene00009239	V	10754469	10756664	-1
caenorhabditis_elegans_prjna13758	WBGene00017911	II	2762417	2763477	1
caenorhabditis_elegans_prjna13758	WBGene00017916	II	2751741	2752611	-1
caenorhabditis_elegans_prjna13758	WBGene00017919	IV	4665251	4667293	1	Tsp_09375		5650153	GL622788	5651781
caenorhabditis_elegans_prjna13758	WBGene00004205	IV	4653293	4655848	1	Tsp_09337		5461164	GL622788	5461819
caenorhabditis_elegans_prjna13758	WBGene00004205	IV	4653293	4655848	1	Tsp_09336		5459876	GL622788	5461157
caenorhabditis_elegans_prjna13758	WBGene00017921	IV	4652459	4653159	1
caenorhabditis_elegans_prjna13758	WBGene00017922	IV	4649744	4650654	1
caenorhabditis_elegans_prjna13758	WBGene00009250	I	8840634	8841163	1
caenorhabditis_elegans_prjna13758	WBGene00009254	I	7634494	7639780	-1
caenorhabditis_elegans_prjna13758	WBGene00009256	V	10658194	10659658	1
caenorhabditis_elegans_prjna13758	WBGene00017930	V	6039094	6040582	1
caenorhabditis_elegans_prjna13758	WBGene00017931	V	6018994	6026337	1
caenorhabditis_elegans_prjna13758	WBGene00004502	V	6016049	6017669	-1	Tsp_07726		10378436	GL622785	10383009
caenorhabditis_elegans_prjna13758	WBGene00017933	V	6035397	6036683	-1
caenorhabditis_elegans_prjna13758	WBGene00009267	I	9506553	9511184	1
caenorhabditis_elegans_prjna13758	WBGene00009262	I	9492615	9494589	-1	Tsp_08677		3898689	GL622789	3900819
caenorhabditis_elegans_prjna13758	WBGene00006061	I	9486642	9488229	-1
caenorhabditis_elegans_prjna13758	WBGene00009270	I	7832692	7835453	-1
caenorhabditis_elegans_prjna13758	WBGene00009271	I	7826442	7831629	-1	Tsp_04399		3312503	GL622788	3316282
caenorhabditis_elegans_prjna13758	WBGene00009272	I	7835814	7836967	1	Tsp_11578		1748715	GL622792	1750509
caenorhabditis_elegans_prjna13758	WBGene00006386	I	7848975	7853631	1	Tsp_00348		1898060	GL622787	1902226
caenorhabditis_elegans_prjna13758	WBGene00003770	III	486123	486547	-1
caenorhabditis_elegans_prjna13758	WBGene00009280	X	15923738	15925169	1
caenorhabditis_elegans_prjna13758	WBGene00009284	I	15036373	15040487	1	Tsp_15629		229	GL626767	1104
caenorhabditis_elegans_prjna13758	WBGene00009284	I	15036373	15040487	1	Tsp_07735		10507826	GL622785	10510690
caenorhabditis_elegans_prjna13758	WBGene00009286	I	15050797	15052420	-1
caenorhabditis_elegans_prjna13758	WBGene00009287	I	15053025	15053670	1
caenorhabditis_elegans_prjna13758	WBGene00009289	V	20838865	20841582	1	Tsp_06288	EXOSC7	10285524	GL622787	10286984
caenorhabditis_elegans_prjna13758	WBGene00001431	V	20846113	20847727	1
caenorhabditis_elegans_prjna13758	WBGene00004340	III	6972210	6973717	1	Tsp_15369		351	GL628433	1381
caenorhabditis_elegans_prjna13758	WBGene00004340	III	6972210	6973717	1	Tsp_04544		327745	GL624340	329249
caenorhabditis_elegans_prjna13758	WBGene00017951	III	6963620	6968130	-1	Tsp_13525		2749	GL628822	3862
caenorhabditis_elegans_prjna13758	WBGene00017951	III	6963620	6968130	-1	Tsp_02196		9046158	GL622787	9049562
caenorhabditis_elegans_prjna13758	WBGene00017951	III	6963620	6968130	-1	Tsp_02199		9034981	GL622787	9039033
caenorhabditis_elegans_prjna13758	WBGene00017951	III	6963620	6968130	-1	Tsp_15940		1240	GL626840	1362
caenorhabditis_elegans_prjna13758	WBGene00017952	III	6982437	6983062	1
caenorhabditis_elegans_prjna13758	WBGene00009300	X	14867101	14868300	-1
caenorhabditis_elegans_prjna13758	WBGene00009302	X	14871836	14872867	-1
caenorhabditis_elegans_prjna13758	WBGene00009308	II	13151459	13153399	-1
caenorhabditis_elegans_prjna13758	WBGene00009309	II	13135034	13137394	-1
caenorhabditis_elegans_prjna13758	WBGene00017967	II	7252259	7255735	1
caenorhabditis_elegans_prjna13758	WBGene00003078	II	7252230	7253222	-1	Tsp_08226		2551400	GL622789	2553265
caenorhabditis_elegans_prjna13758	WBGene00009305	I	14839856	14843128	1	Tsp_14744		18	GL625327	970
caenorhabditis_elegans_prjna13758	WBGene00009305	I	14839856	14843128	1	Tsp_04543		325949	GL624340	327484
caenorhabditis_elegans_prjna13758	WBGene00009306	I	14846476	14850137	1
caenorhabditis_elegans_prjna13758	WBGene00009313	I	11512840	11513853	-1
caenorhabditis_elegans_prjna13758	WBGene00017978	I	2692074	2692467	1
caenorhabditis_elegans_prjna13758	WBGene00009324	IV	9887190	9889929	-1
caenorhabditis_elegans_prjna13758	WBGene00009320	IV	9882132	9884383	-1	Tsp_15116		157	GL623434	645
caenorhabditis_elegans_prjna13758	WBGene00009320	IV	9882132	9884383	-1	Tsp_02989		2238350	GL622785	2240127
caenorhabditis_elegans_prjna13758	WBGene00006056	IV	9892739	9893779	-1
caenorhabditis_elegans_prjna13758	WBGene00003464	IV	9894596	9895038	1	Tsp_00768		3048065	GL622787	3048698
caenorhabditis_elegans_prjna13758	WBGene00003464	IV	9894596	9895038	1	Tsp_00761		3076026	GL622787	3077501
caenorhabditis_elegans_prjna13758	WBGene00003464	IV	9894596	9895038	1	Tsp_00756		2908432	GL622787	2908941
caenorhabditis_elegans_prjna13758	WBGene00003464	IV	9894596	9895038	1	Tsp_13425		585	GL623126	965
caenorhabditis_elegans_prjna13758	WBGene00003464	IV	9894596	9895038	1	Tsp_13917		820	GL624354	1264
caenorhabditis_elegans_prjna13758	WBGene00006049	IV	9895388	9896147	1
caenorhabditis_elegans_prjna13758	WBGene00003159	V	4347166	4349768	1
caenorhabditis_elegans_prjna13758	WBGene00001722	V	4362722	4364650	-1
caenorhabditis_elegans_prjna13758	WBGene00017985	V	4373760	4374874	-1
caenorhabditis_elegans_prjna13758	WBGene00017986	V	4374974	4376173	-1
caenorhabditis_elegans_prjna13758	WBGene00017988	V	4371807	4373811	1	Tsp_00518		2087982	GL622787	2090396
caenorhabditis_elegans_prjna13758	WBGene00017989	IV	7580597	7583726	1	Tsp_04317		2886252	GL622788	2889189
caenorhabditis_elegans_prjna13758	WBGene00017990	IV	7575622	7577325	1
caenorhabditis_elegans_prjna13758	WBGene00017992	IV	7574355	7578381	-1
caenorhabditis_elegans_prjna13758	WBGene00017993	IV	7578501	7580269	-1
caenorhabditis_elegans_prjna13758	WBGene00007026	I	8966130	8967004	1
caenorhabditis_elegans_prjna13758	WBGene00004953	I	8966985	8970158	-1
caenorhabditis_elegans_prjna13758	WBGene00009341	I	8971139	8973063	1	Tsp_00088		522850	GL622787	524091
caenorhabditis_elegans_prjna13758	WBGene00009344	I	8995572	8997290	-1
caenorhabditis_elegans_prjna13758	WBGene00006532	I	8994002	8998593	1
caenorhabditis_elegans_prjna13758	WBGene00002957	II	11022370	11027909	1	Tsp_05710		4875900	GL622792	4880650
caenorhabditis_elegans_prjna13758	WBGene00018000	I	5852045	5852962	1
caenorhabditis_elegans_prjna13758	WBGene00018007	I	5866514	5868139	-1	Tsp_11820		1266762	GL622792	1274356
caenorhabditis_elegans_prjna13758	WBGene00018001	I	5847477	5849391	1
caenorhabditis_elegans_prjna13758	WBGene00018010	V	297949	300005	1
caenorhabditis_elegans_prjna13758	WBGene00018011	V	300015	304713	-1	Tsp_03086		2665460	GL622785	2668484
caenorhabditis_elegans_prjna13758	WBGene00018011	V	300015	304713	-1	Tsp_14384		225	GL622820	992
caenorhabditis_elegans_prjna13758	WBGene00018014	II	5029942	5031712	-1	Tsp_07670		10142015	GL622785	10142409
caenorhabditis_elegans_prjna13758	WBGene00018015	II	5031757	5034035	-1
caenorhabditis_elegans_prjna13758	WBGene00018016	II	5034142	5036439	-1
caenorhabditis_elegans_prjna13758	WBGene00001686	II	10171255	10172497	1
caenorhabditis_elegans_prjna13758	WBGene00009364	II	10172923	10174346	1
caenorhabditis_elegans_prjna13758	WBGene00009365	II	10174572	10180183	1
caenorhabditis_elegans_prjna13758	WBGene00001049	I	15017283	15023017	-1	Tsp_11487		427717	GL622790	435286
caenorhabditis_elegans_prjna13758	WBGene00001049	I	15017283	15023017	-1	Tsp_00165		827512	GL622787	832124
caenorhabditis_elegans_prjna13758	WBGene00001049	I	15017283	15023017	-1	Tsp_12342		480	GL629576	4064
caenorhabditis_elegans_prjna13758	WBGene00009366	I	15023092	15027761	1	Tsp_10409		667296	GL622791	669373
caenorhabditis_elegans_prjna13758	WBGene00009366	I	15023092	15027761	1	Tsp_10410		669398	GL622791	670921
caenorhabditis_elegans_prjna13758	WBGene00009367	I	15034517	15035467	1
caenorhabditis_elegans_prjna13758	WBGene00009372	III	3729493	3735039	-1	Tsp_11153		5082926	GL622792	5085426
caenorhabditis_elegans_prjna13758	WBGene00018024	X	3807460	3816429	1	Tsp_07362		1011392	GL622784	1017763
caenorhabditis_elegans_prjna13758	WBGene00009401	II	8244185	8246409	-1
caenorhabditis_elegans_prjna13758	WBGene00009402	II	8246776	8248263	1
caenorhabditis_elegans_prjna13758	WBGene00009404	II	8253740	8255319	1
caenorhabditis_elegans_prjna13758	WBGene00009427	V	13725905	13727014	1
caenorhabditis_elegans_prjna13758	WBGene00009412	I	11741603	11743951	-1
caenorhabditis_elegans_prjna13758	WBGene00009413	I	11707818	11712197	-1
caenorhabditis_elegans_prjna13758	WBGene00009416	I	11723427	11726326	-1
caenorhabditis_elegans_prjna13758	WBGene00018064	IV	4042575	4047786	1	Tsp_04052		1717923	GL622788	1720646
caenorhabditis_elegans_prjna13758	WBGene00000206	III	4594543	4595944	-1	Tsp_08439		4230250	GL622788	4231393
caenorhabditis_elegans_prjna13758	WBGene00009444	III	4593176	4593832	1
caenorhabditis_elegans_prjna13758	WBGene00009445	III	4581795	4583893	1	Tsp_11317		266245	GL624139	268344
caenorhabditis_elegans_prjna13758	WBGene00009445	III	4581795	4583893	1	Tsp_12959		226	GL627483	1749
caenorhabditis_elegans_prjna13758	WBGene00009440	III	4567325	4571835	1
caenorhabditis_elegans_prjna13758	WBGene00009442	III	4584583	4586753	1
caenorhabditis_elegans_prjna13758	WBGene00004874	III	4587415	4593124	1
caenorhabditis_elegans_prjna13758	WBGene00018068	IV	8329205	8329956	1
caenorhabditis_elegans_prjna13758	WBGene00018070	IV	8300755	8301165	1
caenorhabditis_elegans_prjna13758	WBGene00018072	IV	8297197	8299843	1
caenorhabditis_elegans_prjna13758	WBGene00009446	II	9552631	9553279	-1
caenorhabditis_elegans_prjna13758	WBGene00009448	II	9557646	9559516	1
caenorhabditis_elegans_prjna13758	WBGene00009449	II	9559497	9560029	-1
caenorhabditis_elegans_prjna13758	WBGene00009451	I	8804799	8808081	-1	Tsp_05507		3710865	GL622792	3714265
caenorhabditis_elegans_prjna13758	WBGene00009457	I	8819499	8820139	-1
caenorhabditis_elegans_prjna13758	WBGene00009458	I	8822188	8823637	1
caenorhabditis_elegans_prjna13758	WBGene00009459	I	8826167	8826670	-1
caenorhabditis_elegans_prjna13758	WBGene00009460	I	8828048	8838719	-1	Tsp_04055		1732308	GL622788	1744146
caenorhabditis_elegans_prjna13758	WBGene00009460	I	8828048	8838719	-1	Tsp_13089		13	GL624346	1544
caenorhabditis_elegans_prjna13758	WBGene00009460	I	8828048	8838719	-1	Tsp_04054		1722974	GL622788	1730499
caenorhabditis_elegans_prjna13758	WBGene00018081	IV	4271215	4271820	1
caenorhabditis_elegans_prjna13758	WBGene00018082	IV	4269608	4270186	1
caenorhabditis_elegans_prjna13758	WBGene00018083	IV	4267582	4268236	1
caenorhabditis_elegans_prjna13758	WBGene00000123	IV	4248020	4258173	1
caenorhabditis_elegans_prjna13758	WBGene00009463	I	11271708	11272346	1
caenorhabditis_elegans_prjna13758	WBGene00009465	I	11269946	11271226	-1
caenorhabditis_elegans_prjna13758	WBGene00009470	V	16516472	16517719	-1
caenorhabditis_elegans_prjna13758	WBGene00009473	V	16527158	16528586	1
caenorhabditis_elegans_prjna13758	WBGene00018087	V	9417056	9419298	1
caenorhabditis_elegans_prjna13758	WBGene00018090	V	9419292	9425762	-1	Tsp_03413		4136756	GL622785	4137814
caenorhabditis_elegans_prjna13758	WBGene00018099	V	2090669	2091735	1
caenorhabditis_elegans_prjna13758	WBGene00009489	V	15983294	15986649	1
caenorhabditis_elegans_prjna13758	WBGene00009491	V	15987494	15988174	-1
caenorhabditis_elegans_prjna13758	WBGene00005401	V	15955797	15957028	1
caenorhabditis_elegans_prjna13758	WBGene00009492	IV	11050128	11052430	1	Tsp_07545		1711702	GL622784	1712427
caenorhabditis_elegans_prjna13758	WBGene00002992	IV	11054308	11063613	1
caenorhabditis_elegans_prjna13758	WBGene00018124	IV	5253407	5254817	-1
caenorhabditis_elegans_prjna13758	WBGene00018127	IV	5262786	5264433	-1
caenorhabditis_elegans_prjna13758	WBGene00018118	IV	5274503	5276115	1
caenorhabditis_elegans_prjna13758	WBGene00018119	IV	5272818	5274156	1
caenorhabditis_elegans_prjna13758	WBGene00018120	IV	5269090	5269626	1
caenorhabditis_elegans_prjna13758	WBGene00018121	IV	5266774	5267603	1
caenorhabditis_elegans_prjna13758	WBGene00003426	IV	5260554	5261010	1	Tsp_00768		3048065	GL622787	3048698
caenorhabditis_elegans_prjna13758	WBGene00003426	IV	5260554	5261010	1	Tsp_00761		3076026	GL622787	3077501
caenorhabditis_elegans_prjna13758	WBGene00003426	IV	5260554	5261010	1	Tsp_00756		2908432	GL622787	2908941
caenorhabditis_elegans_prjna13758	WBGene00003426	IV	5260554	5261010	1	Tsp_13425		585	GL623126	965
caenorhabditis_elegans_prjna13758	WBGene00003426	IV	5260554	5261010	1	Tsp_13917		820	GL624354	1264
caenorhabditis_elegans_prjna13758	WBGene00018122	IV	5258685	5259985	1	Tsp_02051		8391493	GL622787	8393242
caenorhabditis_elegans_prjna13758	WBGene00018122	IV	5258685	5259985	1	Tsp_06549		11192741	GL622787	11195348
caenorhabditis_elegans_prjna13758	WBGene00018122	IV	5258685	5259985	1	Tsp_00662	Ttbk2	2539389	GL622787	2540670
caenorhabditis_elegans_prjna13758	WBGene00018122	IV	5258685	5259985	1	Tsp_04341	Ttbk1	3010978	GL622788	3012100
caenorhabditis_elegans_prjna13758	WBGene00018122	IV	5258685	5259985	1	Tsp_06889.2		8369982	GL622785	8372542
caenorhabditis_elegans_prjna13758	WBGene00018123	IV	5257020	5258352	1	Tsp_02051		8391493	GL622787	8393242
caenorhabditis_elegans_prjna13758	WBGene00018123	IV	5257020	5258352	1	Tsp_06549		11192741	GL622787	11195348
caenorhabditis_elegans_prjna13758	WBGene00018123	IV	5257020	5258352	1	Tsp_00662	Ttbk2	2539389	GL622787	2540670
caenorhabditis_elegans_prjna13758	WBGene00018123	IV	5257020	5258352	1	Tsp_04341	Ttbk1	3010978	GL622788	3012100
caenorhabditis_elegans_prjna13758	WBGene00018123	IV	5257020	5258352	1	Tsp_06889.2		8369982	GL622785	8372542
caenorhabditis_elegans_prjna13758	WBGene00002169	III	6703993	6710084	-1	Tsp_01296		5156433	GL622787	5161344
caenorhabditis_elegans_prjna13758	WBGene00009501	III	3928436	3929233	1
caenorhabditis_elegans_prjna13758	WBGene00009502	III	3929530	3931523	-1
caenorhabditis_elegans_prjna13758	WBGene00005448	V	2867792	2869603	-1
caenorhabditis_elegans_prjna13758	WBGene00018152	III	7167838	7170990	1	Tsp_03822		670149	GL622788	676252
caenorhabditis_elegans_prjna13758	WBGene00009507	I	10479283	10484969	-1	Tsp_01290		5174096	GL622787	5176570
caenorhabditis_elegans_prjna13758	WBGene00018156	I	6421978	6425794	1	Tsp_04884		1352039	GL624340	1356937
caenorhabditis_elegans_prjna13758	WBGene00018158	I	6429525	6431586	-1
caenorhabditis_elegans_prjna13758	WBGene00009513	II	11186028	11188080	1	Tsp_11550		735716	GL622790	741190
caenorhabditis_elegans_prjna13758	WBGene00009513	II	11186028	11188080	1	Tsp_12889		454	GL626579	1719
caenorhabditis_elegans_prjna13758	WBGene00018168	IV	6592666	6594529	1
caenorhabditis_elegans_prjna13758	WBGene00001029	IV	6585871	6588186	1	Tsp_10571		6060079	GL622792	6064007
caenorhabditis_elegans_prjna13758	WBGene00018163	IV	6596108	6597398	-1
caenorhabditis_elegans_prjna13758	WBGene00001110	V	11554635	11558127	1
caenorhabditis_elegans_prjna13758	WBGene00018178	V	8376117	8377944	1
caenorhabditis_elegans_prjna13758	WBGene00018179	V	8360092	8361986	1
caenorhabditis_elegans_prjna13758	WBGene00003395	V	8355953	8358185	1
caenorhabditis_elegans_prjna13758	WBGene00009548	IV	11848232	11850309	1
caenorhabditis_elegans_prjna13758	WBGene00009549	IV	11852193	11853146	1	Tsp_00259		940785	GL622787	941576
caenorhabditis_elegans_prjna13758	WBGene00009550	IV	11847009	11847871	-1
caenorhabditis_elegans_prjna13758	WBGene00009553	I	14791040	14794371	1	Tsp_10446		885846	GL622791	888634
caenorhabditis_elegans_prjna13758	WBGene00009553	I	14791040	14794371	1	Tsp_10052		207235	GL622789	209212
caenorhabditis_elegans_prjna13758	WBGene00009556	I	14775184	14776663	-1	Tsp_09733		5932024	GL622789	5932869
caenorhabditis_elegans_prjna13758	WBGene00018203	X	16891991	16893148	1
caenorhabditis_elegans_prjna13758	WBGene00003953	I	8695205	8696376	-1
caenorhabditis_elegans_prjna13758	WBGene00009562	I	8658874	8659967	1
caenorhabditis_elegans_prjna13758	WBGene00009563	I	8664925	8666499	1	Tsp_05593		4131064	GL622792	4134195
caenorhabditis_elegans_prjna13758	WBGene00006377	I	8663048	8664143	-1
caenorhabditis_elegans_prjna13758	WBGene00018223	II	2520965	2522044	-1
caenorhabditis_elegans_prjna13758	WBGene00009568	V	17171851	17173313	1
caenorhabditis_elegans_prjna13758	WBGene00018230	I	2642724	2643778	1
caenorhabditis_elegans_prjna13758	WBGene00009588	IV	11592351	11594003	-1
caenorhabditis_elegans_prjna13758	WBGene00009592	III	9918645	9920864	-1
caenorhabditis_elegans_prjna13758	WBGene00009575	II	11127634	11129256	1	Tsp_00848		3507418	GL622787	3509438
caenorhabditis_elegans_prjna13758	WBGene00009578	II	11132861	11135140	-1
caenorhabditis_elegans_prjna13758	WBGene00003076	II	11126932	11127530	1	Tsp_07966	LSM1	1072097	GL622789	1073170
caenorhabditis_elegans_prjna13758	WBGene00009581	V	9715209	9716380	1
caenorhabditis_elegans_prjna13758	WBGene00009605	V	14283528	14285327	1
caenorhabditis_elegans_prjna13758	WBGene00009606	V	14286171	14288056	1
caenorhabditis_elegans_prjna13758	WBGene00018248	III	176111	177815	-1
caenorhabditis_elegans_prjna13758	WBGene00018253	III	6057055	6058444	1
caenorhabditis_elegans_prjna13758	WBGene00005992	II	3689467	3690746	-1
caenorhabditis_elegans_prjna13758	WBGene00001424	II	6755136	6755965	1	Tsp_05902		5832694	GL622785	5833548
caenorhabditis_elegans_prjna13758	WBGene00001424	II	6755136	6755965	1	Tsp_05905		5911946	GL622785	5912800
caenorhabditis_elegans_prjna13758	WBGene00018301	II	6746704	6748586	1	Tsp_02051		8391493	GL622787	8393242
caenorhabditis_elegans_prjna13758	WBGene00018301	II	6746704	6748586	1	Tsp_06549		11192741	GL622787	11195348
caenorhabditis_elegans_prjna13758	WBGene00018301	II	6746704	6748586	1	Tsp_00662	Ttbk2	2539389	GL622787	2540670
caenorhabditis_elegans_prjna13758	WBGene00018301	II	6746704	6748586	1	Tsp_04341	Ttbk1	3010978	GL622788	3012100
caenorhabditis_elegans_prjna13758	WBGene00018301	II	6746704	6748586	1	Tsp_06889.2		8369982	GL622785	8372542
caenorhabditis_elegans_prjna13758	WBGene00018302	II	6742914	6744267	1
caenorhabditis_elegans_prjna13758	WBGene00002032	IV	5390184	5391557	-1
caenorhabditis_elegans_prjna13758	WBGene00018325	IV	3320013	3324950	1
caenorhabditis_elegans_prjna13758	WBGene00018327	IV	3330826	3331791	-1
caenorhabditis_elegans_prjna13758	WBGene00018328	IV	3334042	3336868	-1	Tsp_05800		5447878	GL622785	5448817
caenorhabditis_elegans_prjna13758	WBGene00009627	II	9353000	9354327	1
caenorhabditis_elegans_prjna13758	WBGene00018332	IV	8617285	8618153	1
caenorhabditis_elegans_prjna13758	WBGene00018333	IV	8615022	8615871	1
caenorhabditis_elegans_prjna13758	WBGene00018335	IV	8609239	8611595	1
caenorhabditis_elegans_prjna13758	WBGene00018337	IV	8618244	8618788	-1
caenorhabditis_elegans_prjna13758	WBGene00018347	IV	7292536	7294221	-1
caenorhabditis_elegans_prjna13758	WBGene00009631	V	13065461	13065794	-1
caenorhabditis_elegans_prjna13758	WBGene00009641	II	13047941	13050807	1
caenorhabditis_elegans_prjna13758	WBGene00009643	II	13079093	13080762	1
caenorhabditis_elegans_prjna13758	WBGene00018357	IV	8130561	8132213	1	Tsp_04285		2756117	GL622788	2758674
caenorhabditis_elegans_prjna13758	WBGene00018359	IV	8119090	8121340	1	Tsp_01125		4353662	GL622787	4354442
caenorhabditis_elegans_prjna13758	WBGene00018360	IV	8115762	8118445	1
caenorhabditis_elegans_prjna13758	WBGene00018362	III	783714	786092	1	Tsp_00466		1441954	GL622787	1445723
caenorhabditis_elegans_prjna13758	WBGene00018366	III	8490624	8491097	1
caenorhabditis_elegans_prjna13758	WBGene00018371	III	8488344	8490347	-1	Tsp_09133		3265854	GL622784	3267896
caenorhabditis_elegans_prjna13758	WBGene00009646	I	9576357	9577907	1
caenorhabditis_elegans_prjna13758	WBGene00002276	I	9578526	9581267	-1	Tsp_11594		1838874	GL622792	1841692
caenorhabditis_elegans_prjna13758	WBGene00009648	III	4243674	4244385	-1
caenorhabditis_elegans_prjna13758	WBGene00009650	V	14612432	14613706	1
caenorhabditis_elegans_prjna13758	WBGene00004798	III	10506106	10506801	-1	Tsp_11071	HSPB1	2099620	GL622784	2100114
caenorhabditis_elegans_prjna13758	WBGene00006395	III	10503965	10505250	-1
caenorhabditis_elegans_prjna13758	WBGene00009662	II	11809347	11810307	1
caenorhabditis_elegans_prjna13758	WBGene00005013	II	11806567	11808805	1
caenorhabditis_elegans_prjna13758	WBGene00009659	II	11810790	11811665	1
caenorhabditis_elegans_prjna13758	WBGene00009661	II	11774669	11777943	-1
caenorhabditis_elegans_prjna13758	WBGene00009671	I	8638514	8640236	-1
caenorhabditis_elegans_prjna13758	WBGene00009672	I	8640508	8644399	1	Tsp_03565		4753109	GL622785	4757778
caenorhabditis_elegans_prjna13758	WBGene00009665	I	8609925	8611066	1
caenorhabditis_elegans_prjna13758	WBGene00009667	I	8610894	8612602	-1
caenorhabditis_elegans_prjna13758	WBGene00009668	I	8615388	8616420	1	Tsp_03672	cpsf5	80781	GL622788	81446
caenorhabditis_elegans_prjna13758	WBGene00001414	I	8623017	8631184	-1
caenorhabditis_elegans_prjna13758	WBGene00000777	I	8636123	8637971	-1	Tsp_11680		1673192	GL622792	1676515
caenorhabditis_elegans_prjna13758	WBGene00018399	V	8023195	8024940	-1
caenorhabditis_elegans_prjna13758	WBGene00003021	III	8016648	8020873	-1
caenorhabditis_elegans_prjna13758	WBGene00004125	III	8025210	8028042	-1
caenorhabditis_elegans_prjna13758	WBGene00002148	V	6606439	6611158	-1
caenorhabditis_elegans_prjna13758	WBGene00014375	IV	10037452	10039043	-1
caenorhabditis_elegans_prjna13758	WBGene00009681	IV	10026413	10027666	-1
caenorhabditis_elegans_prjna13758	WBGene00009683	IV	10033363	10034820	1
caenorhabditis_elegans_prjna13758	WBGene00009684	IV	10035638	10035967	1
caenorhabditis_elegans_prjna13758	WBGene00009685	IV	10023291	10025226	1
caenorhabditis_elegans_prjna13758	WBGene00018420	III	8845856	8848486	-1
caenorhabditis_elegans_prjna13758	WBGene00018421	III	8848582	8849877	-1
caenorhabditis_elegans_prjna13758	WBGene00018427	V	5778818	5780947	-1
caenorhabditis_elegans_prjna13758	WBGene00009695	I	13254141	13257729	1
caenorhabditis_elegans_prjna13758	WBGene00009705	II	10915901	10917274	-1
caenorhabditis_elegans_prjna13758	WBGene00009701	II	10882408	10884462	-1
caenorhabditis_elegans_prjna13758	WBGene00009708	V	16133781	16137143	-1
caenorhabditis_elegans_prjna13758	WBGene00009711	II	8994636	8996269	1	Tsp_02353		9504876	GL622787	9506760
caenorhabditis_elegans_prjna13758	WBGene00006514	II	8997827	8999722	1
caenorhabditis_elegans_prjna13758	WBGene00009714	II	8999727	9000431	-1
caenorhabditis_elegans_prjna13758	WBGene00004354	X	14964553	14965976	1
caenorhabditis_elegans_prjna13758	WBGene00004353	X	14962922	14963995	1
caenorhabditis_elegans_prjna13758	WBGene00018443	II	1713238	1714397	1
caenorhabditis_elegans_prjna13758	WBGene00018446	II	1733718	1736533	-1
caenorhabditis_elegans_prjna13758	WBGene00018438	II	1715162	1716497	1
caenorhabditis_elegans_prjna13758	WBGene00000271	II	7305861	7308738	1	Tsp_00909	Brf1	3649792	GL622787	3652172
caenorhabditis_elegans_prjna13758	WBGene00000839	II	7302101	7305760	1	Tsp_12317		15021	GL629088	15965
caenorhabditis_elegans_prjna13758	WBGene00000839	II	7302101	7305760	1	Tsp_12318		18017	GL629088	21365
caenorhabditis_elegans_prjna13758	WBGene00004046	IV	7633360	7634657	1	Tsp_09335		5458150	GL622788	5459221
caenorhabditis_elegans_prjna13758	WBGene00018471	IV	7630718	7632672	-1
caenorhabditis_elegans_prjna13758	WBGene00001975	IV	7644895	7646219	-1
caenorhabditis_elegans_prjna13758	WBGene00018482	V	8513577	8518764	-1
caenorhabditis_elegans_prjna13758	WBGene00018483	V	8519346	8520896	-1
caenorhabditis_elegans_prjna13758	WBGene00009731	III	13423514	13426204	1
caenorhabditis_elegans_prjna13758	WBGene00009735	III	13435771	13436943	-1
caenorhabditis_elegans_prjna13758	WBGene00009744	I	10374809	10379631	1
caenorhabditis_elegans_prjna13758	WBGene00009753	I	11253256	11256022	1
caenorhabditis_elegans_prjna13758	WBGene00009752	I	11252238	11252981	1
caenorhabditis_elegans_prjna13758	WBGene00009754	I	9457456	9458842	1
caenorhabditis_elegans_prjna13758	WBGene00009755	I	9459287	9460550	1
caenorhabditis_elegans_prjna13758	WBGene00004808	I	9469704	9470633	1
caenorhabditis_elegans_prjna13758	WBGene00009759	V	20607804	20608559	-1
caenorhabditis_elegans_prjna13758	WBGene00005702	V	9803476	9804607	1
caenorhabditis_elegans_prjna13758	WBGene00009769	V	9777863	9779518	-1	Tsp_07064		9233699	GL622785	9235737
caenorhabditis_elegans_prjna13758	WBGene00009770	V	9779550	9783062	-1
caenorhabditis_elegans_prjna13758	WBGene00009782	II	8839325	8840243	1
caenorhabditis_elegans_prjna13758	WBGene00018513	I	5623019	5624475	-1
caenorhabditis_elegans_prjna13758	WBGene00000473	I	5619569	5620668	1	Tsp_05554		3860189	GL622792	3860985
caenorhabditis_elegans_prjna13758	WBGene00018510	I	5620751	5623035	1
caenorhabditis_elegans_prjna13758	WBGene00018502	II	808757	811887	1
caenorhabditis_elegans_prjna13758	WBGene00018494	II	796274	798412	-1
caenorhabditis_elegans_prjna13758	WBGene00018495	II	805028	806438	-1
caenorhabditis_elegans_prjna13758	WBGene00018500	II	822449	822860	-1
caenorhabditis_elegans_prjna13758	WBGene00018525	I	3972162	3973703	1
caenorhabditis_elegans_prjna13758	WBGene00018526	I	3970374	3971302	1
caenorhabditis_elegans_prjna13758	WBGene00018528	I	3960968	3962249	1
caenorhabditis_elegans_prjna13758	WBGene00018529	I	3963115	3964177	-1
caenorhabditis_elegans_prjna13758	WBGene00018530	I	3965738	3967279	-1
caenorhabditis_elegans_prjna13758	WBGene00018531	I	3968118	3970474	-1
caenorhabditis_elegans_prjna13758	WBGene00006057	V	14346059	14346967	1
caenorhabditis_elegans_prjna13758	WBGene00005432	IV	3979825	3981205	1
caenorhabditis_elegans_prjna13758	WBGene00018548	IV	3973349	3975721	1
caenorhabditis_elegans_prjna13758	WBGene00018563	III	6293247	6296022	-1
caenorhabditis_elegans_prjna13758	WBGene00018575	II	1255937	1258353	1
caenorhabditis_elegans_prjna13758	WBGene00004969	I	1446497	1465358	1
caenorhabditis_elegans_prjna13758	WBGene00009834	V	17348665	17350180	-1
caenorhabditis_elegans_prjna13758	WBGene00018585	II	213169	216621	-1
caenorhabditis_elegans_prjna13758	WBGene00018586	II	217049	220667	-1
caenorhabditis_elegans_prjna13758	WBGene00006624	I	6585039	6587882	1
caenorhabditis_elegans_prjna13758	WBGene00018595	I	5319720	5321117	1
caenorhabditis_elegans_prjna13758	WBGene00018598	I	5317491	5318124	-1
caenorhabditis_elegans_prjna13758	WBGene00004965	I	5330578	5332194	-1
caenorhabditis_elegans_prjna13758	WBGene00018609	III	5464381	5467992	1	Tsp_04512		255388	GL624340	256188
caenorhabditis_elegans_prjna13758	WBGene00018612	III	5443167	5446506	1
caenorhabditis_elegans_prjna13758	WBGene00018613	III	5446510	5448419	-1
caenorhabditis_elegans_prjna13758	WBGene00018620	V	628059	628623	-1	Tsp_14455		12	GL627789	993
caenorhabditis_elegans_prjna13758	WBGene00018620	V	628059	628623	-1	Tsp_08348		3897196	GL622788	3899177
caenorhabditis_elegans_prjna13758	WBGene00009884	IV	9324435	9327516	1
caenorhabditis_elegans_prjna13758	WBGene00004463	IV	9316639	9318632	1	Tsp_03448		4286620	GL622785	4292416
caenorhabditis_elegans_prjna13758	WBGene00009878	IV	9314810	9316215	-1
caenorhabditis_elegans_prjna13758	WBGene00018625	I	10936819	10940521	1	Tsp_12048		3290107	GL622789	3292973
caenorhabditis_elegans_prjna13758	WBGene00018632	I	10933810	10935712	-1	Tsp_13923		1145	GL623265	2303
caenorhabditis_elegans_prjna13758	WBGene00018632	I	10933810	10935712	-1	Tsp_05647		4323175	GL622792	4324333
caenorhabditis_elegans_prjna13758	WBGene00009893	IV	13053297	13055154	1	Tsp_01125		4353662	GL622787	4354442
caenorhabditis_elegans_prjna13758	WBGene00006719	II	8405603	8406924	1
caenorhabditis_elegans_prjna13758	WBGene00018635	IV	7557209	7558749	1	Tsp_06912		8462800	GL622785	8464239
caenorhabditis_elegans_prjna13758	WBGene00018636	IV	7548417	7551511	1
caenorhabditis_elegans_prjna13758	WBGene00018638	IV	7554489	7556447	-1
caenorhabditis_elegans_prjna13758	WBGene00018652	IV	4141734	4143019	-1
caenorhabditis_elegans_prjna13758	WBGene00009924	IV	14077441	14083559	1	Tsp_02372		9884200	GL622787	9888244
caenorhabditis_elegans_prjna13758	WBGene00009921	I	8315898	8318250	-1
caenorhabditis_elegans_prjna13758	WBGene00009922	I	8318347	8323987	-1	Tsp_05179	DHX30	2312105	GL624340	2317055
caenorhabditis_elegans_prjna13758	WBGene00000467	I	8324120	8328853	1
caenorhabditis_elegans_prjna13758	WBGene00004439	I	8329062	8329684	-1	Tsp_06633	rpl-25.1	11584026	GL622787	11585153
caenorhabditis_elegans_prjna13758	WBGene00018678	IV	1959854	1963240	1	Tsp_10827		67053	GL623868	68898
caenorhabditis_elegans_prjna13758	WBGene00018679	IV	1953579	1956704	1	Tsp_00957		3885991	GL622787	3888629
caenorhabditis_elegans_prjna13758	WBGene00018680	IV	1948191	1953322	1
caenorhabditis_elegans_prjna13758	WBGene00018658	II	1927879	1928734	1
caenorhabditis_elegans_prjna13758	WBGene00018667	II	1919926	1921111	-1
caenorhabditis_elegans_prjna13758	WBGene00018668	II	1921452	1922744	-1
caenorhabditis_elegans_prjna13758	WBGene00018659	II	1926462	1927347	1
caenorhabditis_elegans_prjna13758	WBGene00018660	II	1924759	1925752	1
caenorhabditis_elegans_prjna13758	WBGene00018661	II	1923140	1923827	1
caenorhabditis_elegans_prjna13758	WBGene00018665	II	1916713	1917958	-1
caenorhabditis_elegans_prjna13758	WBGene00018666	II	1918319	1919439	-1
caenorhabditis_elegans_prjna13758	WBGene00003391	III	5308600	5311140	1	Tsp_04666		638450	GL624340	640659
caenorhabditis_elegans_prjna13758	WBGene00004351	X	1952479	1953560	-1
caenorhabditis_elegans_prjna13758	WBGene00001569	X	1986429	1989607	-1
caenorhabditis_elegans_prjna13758	WBGene00004078	V	8414085	8415254	1	Tsp_12414		8096	GL624002	8753
caenorhabditis_elegans_prjna13758	WBGene00004078	V	8414085	8415254	1	Tsp_08560	zfp36l2	4699442	GL622788	4700099
caenorhabditis_elegans_prjna13758	WBGene00004078	V	8414085	8415254	1	Tsp_08559	Zfp36l3	4695882	GL622788	4696511
caenorhabditis_elegans_prjna13758	WBGene00004078	V	8414085	8415254	1	Tsp_12415		11512	GL624002	12169
caenorhabditis_elegans_prjna13758	WBGene00004078	V	8414085	8415254	1	Tsp_12413.2		5119	GL624002	5437
caenorhabditis_elegans_prjna13758	WBGene00004078	V	8414085	8415254	1	Tsp_08561		4702854	GL622788	4703511
caenorhabditis_elegans_prjna13758	WBGene00018698	V	8411775	8413513	-1	Tsp_02924		1933686	GL622785	1936548
caenorhabditis_elegans_prjna13758	WBGene00009937	I	9901255	9902929	1	Tsp_07065		9238570	GL622785	9239571
caenorhabditis_elegans_prjna13758	WBGene00009938	I	9921211	9921961	-1
caenorhabditis_elegans_prjna13758	WBGene00009944	II	10030895	10033213	-1
caenorhabditis_elegans_prjna13758	WBGene00009946	II	10041134	10042515	1
caenorhabditis_elegans_prjna13758	WBGene00009948	II	10026595	10027966	-1
caenorhabditis_elegans_prjna13758	WBGene00003829	III	13341527	13342607	1	Tsp_09025		2847793	GL622784	2850161
caenorhabditis_elegans_prjna13758	WBGene00001092	III	13342684	13343337	1	Tsp_04254		2628862	GL622788	2630134
caenorhabditis_elegans_prjna13758	WBGene00002059	III	13343574	13344616	1
caenorhabditis_elegans_prjna13758	WBGene00003478	III	13347085	13355683	1	Tsp_01469		6056187	GL622787	6062157
caenorhabditis_elegans_prjna13758	WBGene00018721	III	1945058	1950270	-1	Tsp_02614		663101	GL622785	665513
caenorhabditis_elegans_prjna13758	WBGene00009954	IV	12517110	12518128	-1
caenorhabditis_elegans_prjna13758	WBGene00009956	IV	12528529	12531166	-1
caenorhabditis_elegans_prjna13758	WBGene00009959	I	8947304	8948711	-1
caenorhabditis_elegans_prjna13758	WBGene00009962	I	8948778	8954394	1
caenorhabditis_elegans_prjna13758	WBGene00009966	V	10999658	11000713	-1
caenorhabditis_elegans_prjna13758	WBGene00009975	V	13787536	13796254	1
caenorhabditis_elegans_prjna13758	WBGene00018745	II	3912003	3913385	1
caenorhabditis_elegans_prjna13758	WBGene00003797	I	3817996	3821505	1	Tsp_03459		4322494	GL622785	4323615
caenorhabditis_elegans_prjna13758	WBGene00003797	I	3817996	3821505	1	Tsp_03460		4323626	GL622785	4325933
caenorhabditis_elegans_prjna13758	WBGene00009993	V	13622107	13624525	-1	Tsp_11884		162113	GL622790	165236
caenorhabditis_elegans_prjna13758	WBGene00009993	V	13622107	13624525	-1	Tsp_12449		6865	GL624672	11654
caenorhabditis_elegans_prjna13758	WBGene00009993	V	13622107	13624525	-1	Tsp_14350		881	GL625180	1261
caenorhabditis_elegans_prjna13758	WBGene00009994	V	13626031	13627482	1
caenorhabditis_elegans_prjna13758	WBGene00009996	V	13627573	13629831	1
caenorhabditis_elegans_prjna13758	WBGene00010000	V	20688734	20689532	-1
caenorhabditis_elegans_prjna13758	WBGene00010002	V	20700340	20704048	-1
caenorhabditis_elegans_prjna13758	WBGene00004962	I	118109	120870	1	Tsp_12784		3362	GL624279	5110
caenorhabditis_elegans_prjna13758	WBGene00004962	I	118109	120870	1	Tsp_06641	Fps85D	11546255	GL622787	11548147
caenorhabditis_elegans_prjna13758	WBGene00004962	I	118109	120870	1	Tsp_11870		113432	GL622790	117458
caenorhabditis_elegans_prjna13758	WBGene00018773	I	113807	114704	1
caenorhabditis_elegans_prjna13758	WBGene00018783	II	2220464	2223567	-1	Tsp_13505		5245	GL625767	6522
caenorhabditis_elegans_prjna13758	WBGene00018783	II	2220464	2223567	-1	Tsp_00354		1878189	GL622787	1880417
caenorhabditis_elegans_prjna13758	WBGene00001050	I	5003351	5005163	1
caenorhabditis_elegans_prjna13758	WBGene00018792	I	5004924	5006057	-1
caenorhabditis_elegans_prjna13758	WBGene00005014	III	69073	69817	-1	Tsp_00705		2665180	GL622787	2666898
caenorhabditis_elegans_prjna13758	WBGene00010035	III	9439699	9440929	1
caenorhabditis_elegans_prjna13758	WBGene00010036	III	9434057	9435100	1
caenorhabditis_elegans_prjna13758	WBGene00001284	III	9435083	9441539	-1
caenorhabditis_elegans_prjna13758	WBGene00010037	III	9441557	9443634	-1
caenorhabditis_elegans_prjna13758	WBGene00010042	II	8571085	8572904	1	Tsp_03371		3998760	GL622785	4000485
caenorhabditis_elegans_prjna13758	WBGene00010042	II	8571085	8572904	1	Tsp_13180		98	GL623602	2248
caenorhabditis_elegans_prjna13758	WBGene00004241	II	8575541	8577732	1
caenorhabditis_elegans_prjna13758	WBGene00010044	II	8578049	8581513	1	Tsp_03018		2340062	GL622785	2342971
caenorhabditis_elegans_prjna13758	WBGene00010046	IV	11261844	11263075	1
caenorhabditis_elegans_prjna13758	WBGene00004821	II	3824148	3825614	1
caenorhabditis_elegans_prjna13758	WBGene00018806	II	3807096	3808223	-1
caenorhabditis_elegans_prjna13758	WBGene00018808	II	3820152	3821312	-1
caenorhabditis_elegans_prjna13758	WBGene00018812	V	4617938	4628510	1
caenorhabditis_elegans_prjna13758	WBGene00018817	II	1368090	1368299	-1
caenorhabditis_elegans_prjna13758	WBGene00010056	II	11578716	11582758	1	Tsp_15102		14	GL623569	1058
caenorhabditis_elegans_prjna13758	WBGene00010048	II	11573180	11575000	1
caenorhabditis_elegans_prjna13758	WBGene00010051	II	11564385	11567020	-1
caenorhabditis_elegans_prjna13758	WBGene00010053	II	11542636	11544875	-1
caenorhabditis_elegans_prjna13758	WBGene00018802	III	5102991	5106955	1
caenorhabditis_elegans_prjna13758	WBGene00010061	IV	11333079	11337184	-1	Tsp_06531		11268490	GL622787	11275448
caenorhabditis_elegans_prjna13758	WBGene00010070	II	13507806	13516479	1	Tsp_00149		622785	GL622787	625202
caenorhabditis_elegans_prjna13758	WBGene00010070	II	13507806	13516479	1	Tsp_00147		629010	GL622787	632541
caenorhabditis_elegans_prjna13758	WBGene00010072	III	13049588	13055485	-1
caenorhabditis_elegans_prjna13758	WBGene00018833	III	8787092	8792346	-1
caenorhabditis_elegans_prjna13758	WBGene00018845	III	7970263	7972161	-1
caenorhabditis_elegans_prjna13758	WBGene00018839	II	6627484	6629270	1
caenorhabditis_elegans_prjna13758	WBGene00018840	II	6622189	6623500	1
caenorhabditis_elegans_prjna13758	WBGene00010077	V	11770456	11773495	1	Tsp_03773		478107	GL622788	481060
caenorhabditis_elegans_prjna13758	WBGene00010079	V	11776838	11783422	1
caenorhabditis_elegans_prjna13758	WBGene00010080	V	11784573	11787443	-1
caenorhabditis_elegans_prjna13758	WBGene00010081	V	11788157	11789121	1
caenorhabditis_elegans_prjna13758	WBGene00018862	I	5368478	5372643	1
caenorhabditis_elegans_prjna13758	WBGene00018864	I	5345927	5349657	1
caenorhabditis_elegans_prjna13758	WBGene00018866	I	5349646	5353767	-1	Tsp_15260		711	GL624258	1270
caenorhabditis_elegans_prjna13758	WBGene00018866	I	5349646	5353767	-1	Tsp_06939.1		8568267	GL622785	8574128
caenorhabditis_elegans_prjna13758	WBGene00018866	I	5349646	5353767	-1	Tsp_06936		8551277	GL622785	8560464
caenorhabditis_elegans_prjna13758	WBGene00018852	I	10785128	10787863	-1
caenorhabditis_elegans_prjna13758	WBGene00010089	V	13823052	13825222	1	Tsp_04511		249933	GL624340	254935
caenorhabditis_elegans_prjna13758	WBGene00018870	II	5876811	5877449	1
caenorhabditis_elegans_prjna13758	WBGene00010092	V	12264002	12265492	1
caenorhabditis_elegans_prjna13758	WBGene00010093	V	12271873	12275676	1
caenorhabditis_elegans_prjna13758	WBGene00010114	I	7901932	7903243	1
caenorhabditis_elegans_prjna13758	WBGene00018898	IV	4360837	4386533	1	Tsp_14647		80	GL627512	997
caenorhabditis_elegans_prjna13758	WBGene00018890	I	5646369	5649656	-1	Tsp_07031		9076906	GL622785	9079718
caenorhabditis_elegans_prjna13758	WBGene00018891	I	5649756	5653648	-1	Tsp_02374		9876314	GL622787	9880130
caenorhabditis_elegans_prjna13758	WBGene00018892	I	5653804	5655857	-1	Tsp_01477		6029372	GL622787	6030745
caenorhabditis_elegans_prjna13758	WBGene00018893	I	5655950	5658118	-1	Tsp_05703		4901399	GL622792	4903999
caenorhabditis_elegans_prjna13758	WBGene00018894	I	5657980	5658723	-1
caenorhabditis_elegans_prjna13758	WBGene00018895	I	5659450	5661272	-1
caenorhabditis_elegans_prjna13758	WBGene00018897	I	5669950	5673352	-1	Tsp_07648		10026727	GL622785	10027824
caenorhabditis_elegans_prjna13758	WBGene00018901	IV	7475041	7476215	1	Tsp_01596		6478192	GL622787	6481504
caenorhabditis_elegans_prjna13758	WBGene00018902	IV	7473517	7474953	1
caenorhabditis_elegans_prjna13758	WBGene00018903	IV	7466702	7469832	-1
caenorhabditis_elegans_prjna13758	WBGene00004044	IV	7470860	7473340	-1	Tsp_02561		467619	GL622785	471249
caenorhabditis_elegans_prjna13758	WBGene00018904	IV	7476171	7477344	-1
caenorhabditis_elegans_prjna13758	WBGene00004901	I	8871791	8875253	1
caenorhabditis_elegans_prjna13758	WBGene00010133	I	8866907	8868293	1
caenorhabditis_elegans_prjna13758	WBGene00003067	III	9504764	9507081	1
caenorhabditis_elegans_prjna13758	WBGene00010132	III	9513348	9516248	-1
caenorhabditis_elegans_prjna13758	WBGene00018926	IV	580283	582230	-1
caenorhabditis_elegans_prjna13758	WBGene00018908	I	5190142	5195243	1
caenorhabditis_elegans_prjna13758	WBGene00018909	I	5182736	5186234	1	Tsp_14543		273	GL623557	503
caenorhabditis_elegans_prjna13758	WBGene00018909	I	5182736	5186234	1	Tsp_01025		4154465	GL622787	4156787
caenorhabditis_elegans_prjna13758	WBGene00004955	I	5171285	5176664	-1
caenorhabditis_elegans_prjna13758	WBGene00018917	V	2456176	2458286	-1
caenorhabditis_elegans_prjna13758	WBGene00010140	III	13263268	13265038	1
caenorhabditis_elegans_prjna13758	WBGene00010141	III	13265866	13266932	1
caenorhabditis_elegans_prjna13758	WBGene00000774	III	13266874	13268897	-1	Tsp_04334		2986791	GL622788	2987560
caenorhabditis_elegans_prjna13758	WBGene00000774	III	13266874	13268897	-1	Tsp_11546		723221	GL622790	725196
caenorhabditis_elegans_prjna13758	WBGene00000774	III	13266874	13268897	-1	Tsp_05173	CSTF2	2287060	GL624340	2289325
caenorhabditis_elegans_prjna13758	WBGene00000774	III	13266874	13268897	-1	Tsp_13276		430	GL623256	1901
caenorhabditis_elegans_prjna13758	WBGene00004824	IV	786234	794326	-1
caenorhabditis_elegans_prjna13758	WBGene00018948	III	7311290	7313195	1	Tsp_05610		4300271	GL622792	4301996
caenorhabditis_elegans_prjna13758	WBGene00018950	III	7308998	7310773	-1
caenorhabditis_elegans_prjna13758	WBGene00018959	II	5478578	5480490	1
caenorhabditis_elegans_prjna13758	WBGene00018961	II	5474373	5475475	1	Tsp_04008		1450880	GL622788	1452934
caenorhabditis_elegans_prjna13758	WBGene00000935	II	5456305	5458609	1
caenorhabditis_elegans_prjna13758	WBGene00018964	III	5587263	5589095	1
caenorhabditis_elegans_prjna13758	WBGene00018967	III	5589036	5591718	-1	Tsp_09577		971683	GL622792	975729
caenorhabditis_elegans_prjna13758	WBGene00010147	IV	9396920	9398603	-1
caenorhabditis_elegans_prjna13758	WBGene00010149	IV	9407213	9408121	-1
caenorhabditis_elegans_prjna13758	WBGene00018973	IV	3915610	3916901	1
caenorhabditis_elegans_prjna13758	WBGene00006488	IV	3903255	3903644	1
caenorhabditis_elegans_prjna13758	WBGene00018975	V	104826	118188	1
caenorhabditis_elegans_prjna13758	WBGene00018991	III	2855554	2865497	1	Tsp_06519		11325864	GL622787	11327745
caenorhabditis_elegans_prjna13758	WBGene00004132	III	4471407	4475150	-1
caenorhabditis_elegans_prjna13758	WBGene00010155	III	4468878	4470808	1
caenorhabditis_elegans_prjna13758	WBGene00018979	I	6145455	6146477	1
caenorhabditis_elegans_prjna13758	WBGene00018980	I	6141469	6144386	1
caenorhabditis_elegans_prjna13758	WBGene00003977	I	11355236	11356370	1
caenorhabditis_elegans_prjna13758	WBGene00010158	I	11358167	11359301	-1
caenorhabditis_elegans_prjna13758	WBGene00010159	I	11374620	11380127	1
caenorhabditis_elegans_prjna13758	WBGene00018994	I	5729793	5735842	-1
caenorhabditis_elegans_prjna13758	WBGene00004505	I	5741868	5743571	-1	Tsp_07392	Psmc3	1144544	GL622784	1147073
caenorhabditis_elegans_prjna13758	WBGene00018995	I	5754312	5760803	-1	Tsp_05380		3020373	GL622792	3022641
caenorhabditis_elegans_prjna13758	WBGene00018995	I	5754312	5760803	-1	Tsp_05381		3017015	GL622792	3019837
caenorhabditis_elegans_prjna13758	WBGene00018995	I	5754312	5760803	-1	Tsp_13206		2538	GL623735	4750
caenorhabditis_elegans_prjna13758	WBGene00001245	IV	9529947	9531378	1
caenorhabditis_elegans_prjna13758	WBGene00010185	V	15769438	15770371	1
caenorhabditis_elegans_prjna13758	WBGene00010181	V	10071945	10073893	-1
caenorhabditis_elegans_prjna13758	WBGene00006311	V	13191707	13193538	-1
caenorhabditis_elegans_prjna13758	WBGene00000236	I	6563629	6564451	-1
caenorhabditis_elegans_prjna13758	WBGene00003184	I	6564749	6565868	-1
caenorhabditis_elegans_prjna13758	WBGene00019002	I	6566173	6568905	1
caenorhabditis_elegans_prjna13758	WBGene00019004	I	6558696	6562346	1	Tsp_05200		2434192	GL624340	2438463
caenorhabditis_elegans_prjna13758	WBGene00019005	I	6548644	6550447	-1	Tsp_08616		3591318	GL622789	3592032
caenorhabditis_elegans_prjna13758	WBGene00004462	III	6959110	6962027	-1	Tsp_00047		287363	GL622787	289891
caenorhabditis_elegans_prjna13758	WBGene00018999	III	6933661	6935334	-1
caenorhabditis_elegans_prjna13758	WBGene00010193	II	14522385	14523522	-1
caenorhabditis_elegans_prjna13758	WBGene00010195	II	14524173	14525112	1	Tsp_03716		220783	GL622788	222607
caenorhabditis_elegans_prjna13758	WBGene00019010	I	4836187	4844966	1
caenorhabditis_elegans_prjna13758	WBGene00002034	I	4827072	4829794	1
caenorhabditis_elegans_prjna13758	WBGene00019013	I	4824921	4826633	-1
caenorhabditis_elegans_prjna13758	WBGene00019015	V	6390463	6392523	1
caenorhabditis_elegans_prjna13758	WBGene00001581	V	6392541	6399921	-1
caenorhabditis_elegans_prjna13758	WBGene00019017	V	6401369	6408783	-1
caenorhabditis_elegans_prjna13758	WBGene00010212	V	17640672	17650527	-1
caenorhabditis_elegans_prjna13758	WBGene00019020	IV	7967363	7969600	1
caenorhabditis_elegans_prjna13758	WBGene00006704	III	9630085	9631167	-1	Tsp_00934		3970973	GL622787	3971965
caenorhabditis_elegans_prjna13758	WBGene00010227	III	9600038	9600745	-1
caenorhabditis_elegans_prjna13758	WBGene00001831	III	9615306	9616470	-1
caenorhabditis_elegans_prjna13758	WBGene00004180	III	9612254	9614281	-1
caenorhabditis_elegans_prjna13758	WBGene00006540	III	9626532	9629154	-1	Tsp_06382		10728828	GL622787	10731564
caenorhabditis_elegans_prjna13758	WBGene00010230	III	9629246	9629917	-1
caenorhabditis_elegans_prjna13758	WBGene00019028	II	5155436	5157625	-1
caenorhabditis_elegans_prjna13758	WBGene00019024	II	5146967	5148465	-1
caenorhabditis_elegans_prjna13758	WBGene00003438	II	5156700	5157083	-1	Tsp_00768		3048065	GL622787	3048698
caenorhabditis_elegans_prjna13758	WBGene00003438	II	5156700	5157083	-1	Tsp_00761		3076026	GL622787	3077501
caenorhabditis_elegans_prjna13758	WBGene00003438	II	5156700	5157083	-1	Tsp_00756		2908432	GL622787	2908941
caenorhabditis_elegans_prjna13758	WBGene00003438	II	5156700	5157083	-1	Tsp_13425		585	GL623126	965
caenorhabditis_elegans_prjna13758	WBGene00003438	II	5156700	5157083	-1	Tsp_13917		820	GL624354	1264
caenorhabditis_elegans_prjna13758	WBGene00010231	IV	11628757	11631850	-1	Tsp_09293		5317929	GL622788	5321394
caenorhabditis_elegans_prjna13758	WBGene00010231	IV	11628757	11631850	-1	Tsp_09294		5322024	GL622788	5325072
caenorhabditis_elegans_prjna13758	WBGene00010232	IV	11636648	11638208	1	Tsp_06042		6498393	GL622785	6501082
caenorhabditis_elegans_prjna13758	WBGene00010233	IV	11638316	11640097	1	Tsp_11979	RBM17	1170972	GL622792	1172454
caenorhabditis_elegans_prjna13758	WBGene00010234	IV	11640047	11641015	-1
caenorhabditis_elegans_prjna13758	WBGene00010241	IV	13189717	13192349	1
caenorhabditis_elegans_prjna13758	WBGene00010247	I	12029927	12031762	-1
caenorhabditis_elegans_prjna13758	WBGene00010254	V	9753423	9754581	-1
caenorhabditis_elegans_prjna13758	WBGene00019062	II	6387525	6388242	-1
caenorhabditis_elegans_prjna13758	WBGene00019063	II	6389275	6391295	-1
caenorhabditis_elegans_prjna13758	WBGene00010263	II	12919551	12923377	1
caenorhabditis_elegans_prjna13758	WBGene00010265	II	12925981	12928341	-1	Tsp_06387		10716569	GL622787	10717856
caenorhabditis_elegans_prjna13758	WBGene00010265	II	12925981	12928341	-1	Tsp_13670		166	GL627984	1026
caenorhabditis_elegans_prjna13758	WBGene00010265	II	12925981	12928341	-1	Tsp_11877		139964	GL622790	141286
caenorhabditis_elegans_prjna13758	WBGene00010265	II	12925981	12928341	-1	Tsp_13257		551	GL628954	1584
caenorhabditis_elegans_prjna13758	WBGene00010265	II	12925981	12928341	-1	Tsp_01419		5756161	GL622787	5757550
caenorhabditis_elegans_prjna13758	WBGene00010265	II	12925981	12928341	-1	Tsp_06318.1		10514671	GL622787	10515097
caenorhabditis_elegans_prjna13758	WBGene00010265	II	12925981	12928341	-1	Tsp_12521		1192	GL627057	2036
caenorhabditis_elegans_prjna13758	WBGene00010265	II	12925981	12928341	-1	Tsp_06319.2		10512081	GL622787	10512342
caenorhabditis_elegans_prjna13758	WBGene00010265	II	12925981	12928341	-1	Tsp_13571		383	GL628396	1344
caenorhabditis_elegans_prjna13758	WBGene00010271	II	12924026	12925241	1
caenorhabditis_elegans_prjna13758	WBGene00010281	V	13669353	13671958	-1
caenorhabditis_elegans_prjna13758	WBGene00006442	V	13675988	13678598	-1	Tsp_05629		4238319	GL622792	4241988
caenorhabditis_elegans_prjna13758	WBGene00010283	V	13678875	13681539	1	Tsp_02024.1		8254887	GL622787	8255598
caenorhabditis_elegans_prjna13758	WBGene00010289	V	11942625	11944656	1
caenorhabditis_elegans_prjna13758	WBGene00010293	V	17656892	17658198	-1
caenorhabditis_elegans_prjna13758	WBGene00010295	V	17653482	17655281	-1
caenorhabditis_elegans_prjna13758	WBGene00003795	III	3400644	3404479	-1	Tsp_00378	RGPD1	1756676	GL622787	1761582
caenorhabditis_elegans_prjna13758	WBGene00010303	III	3396585	3397675	1	Tsp_00845		3514822	GL622787	3515922
caenorhabditis_elegans_prjna13758	WBGene00010304	III	3397743	3400644	1	Tsp_03638		5057157	GL622785	5060680
caenorhabditis_elegans_prjna13758	WBGene00010304	III	3397743	3400644	1	Tsp_03622.2		5018385	GL622785	5020473
caenorhabditis_elegans_prjna13758	WBGene00010305	III	3404863	3405469	1
caenorhabditis_elegans_prjna13758	WBGene00019075	I	5512048	5514557	1
caenorhabditis_elegans_prjna13758	WBGene00019077	I	5507123	5509288	-1	Tsp_10418		691906	GL622791	695963
caenorhabditis_elegans_prjna13758	WBGene00019080	I	5517347	5518563	-1
caenorhabditis_elegans_prjna13758	WBGene00019081	I	5522396	5525340	-1
caenorhabditis_elegans_prjna13758	WBGene00019084	II	5014699	5015324	1
caenorhabditis_elegans_prjna13758	WBGene00019086	II	5005081	5008068	1
caenorhabditis_elegans_prjna13758	WBGene00019087	II	4999520	5003806	1
caenorhabditis_elegans_prjna13758	WBGene00001857	V	2030619	2031475	-1
caenorhabditis_elegans_prjna13758	WBGene00019098	V	3625022	3627044	-1
caenorhabditis_elegans_prjna13758	WBGene00010309	III	8999828	9001973	-1	Tsp_00047		287363	GL622787	289891
caenorhabditis_elegans_prjna13758	WBGene00006977	III	9002779	9004839	1
caenorhabditis_elegans_prjna13758	WBGene00010323	I	10522091	10523996	1
caenorhabditis_elegans_prjna13758	WBGene00010324	I	10524424	10525509	1
caenorhabditis_elegans_prjna13758	WBGene00010325	I	10518379	10519263	1
caenorhabditis_elegans_prjna13758	WBGene00003742	I	10517324	10518055	-1
caenorhabditis_elegans_prjna13758	WBGene00003882	II	10873931	10877934	1	Tsp_01471		6050226	GL622787	6051401
caenorhabditis_elegans_prjna13758	WBGene00019118	II	5654515	5657371	1
caenorhabditis_elegans_prjna13758	WBGene00019126	II	5648000	5649074	-1
caenorhabditis_elegans_prjna13758	WBGene00006402	II	5657710	5659854	-1
caenorhabditis_elegans_prjna13758	WBGene00019119	II	5638381	5639752	1
caenorhabditis_elegans_prjna13758	WBGene00006644	II	5904552	5906308	1
caenorhabditis_elegans_prjna13758	WBGene00004214	II	5918626	5921617	1	Tsp_10590		6094173	GL622792	6098496
caenorhabditis_elegans_prjna13758	WBGene00019131	II	2514977	2516097	-1
caenorhabditis_elegans_prjna13758	WBGene00019132	II	2035702	2039388	-1
caenorhabditis_elegans_prjna13758	WBGene00019140	II	2029232	2030467	-1
caenorhabditis_elegans_prjna13758	WBGene00019141	II	2030750	2031952	-1
caenorhabditis_elegans_prjna13758	WBGene00000864	II	2022673	2023614	-1
caenorhabditis_elegans_prjna13758	WBGene00019138	II	2025642	2026610	-1
caenorhabditis_elegans_prjna13758	WBGene00019139	II	2027612	2028812	-1
caenorhabditis_elegans_prjna13758	WBGene00010351	IV	11372991	11377627	1
caenorhabditis_elegans_prjna13758	WBGene00010353	IV	11401884	11403338	-1
caenorhabditis_elegans_prjna13758	WBGene00010354	IV	11403961	11406066	1
caenorhabditis_elegans_prjna13758	WBGene00010362	III	10436609	10438089	1
caenorhabditis_elegans_prjna13758	WBGene00010364	III	10443090	10445136	1
caenorhabditis_elegans_prjna13758	WBGene00019158	III	2962170	2965634	-1
caenorhabditis_elegans_prjna13758	WBGene00010366	I	7972473	7977078	-1
caenorhabditis_elegans_prjna13758	WBGene00019163	IV	4807430	4809487	-1	Tsp_03591		4888229	GL622785	4890150
caenorhabditis_elegans_prjna13758	WBGene00019165	IV	4825488	4827281	-1
caenorhabditis_elegans_prjna13758	WBGene00010371	I	7002870	7003481	-1
caenorhabditis_elegans_prjna13758	WBGene00010373	IV	13834286	13836390	-1
caenorhabditis_elegans_prjna13758	WBGene00019189	X	17710286	17711674	-1
caenorhabditis_elegans_prjna13758	WBGene00010377	V	14886803	14886907	-1
caenorhabditis_elegans_prjna13758	WBGene00010378	V	14887685	14888477	-1
caenorhabditis_elegans_prjna13758	WBGene00010381	V	14894053	14894798	1
caenorhabditis_elegans_prjna13758	WBGene00010388	IV	14129391	14131061	1
caenorhabditis_elegans_prjna13758	WBGene00019202	V	8932618	8934265	1
caenorhabditis_elegans_prjna13758	WBGene00019219	II	4329023	4334484	1	Tsp_01918		7804220	GL622787	7807598
caenorhabditis_elegans_prjna13758	WBGene00019220	II	4326720	4328284	1	Tsp_05977		6068453	GL622785	6068833
caenorhabditis_elegans_prjna13758	WBGene00003390	II	4324361	4326089	1	Tsp_09506		741868	GL622792	747766
caenorhabditis_elegans_prjna13758	WBGene00010409	IV	11480846	11482437	1
caenorhabditis_elegans_prjna13758	WBGene00019229	IV	8715247	8717881	1
caenorhabditis_elegans_prjna13758	WBGene00019243	V	722695	723827	-1
caenorhabditis_elegans_prjna13758	WBGene00002042	I	3698102	3699300	1
caenorhabditis_elegans_prjna13758	WBGene00003418	I	3694296	3697549	-1
caenorhabditis_elegans_prjna13758	WBGene00010420	I	12647376	12652087	-1	Tsp_07041		9117232	GL622785	9120198
caenorhabditis_elegans_prjna13758	WBGene00019255	IV	5934346	5937497	1
caenorhabditis_elegans_prjna13758	WBGene00019257	IV	5917326	5921446	1
caenorhabditis_elegans_prjna13758	WBGene00004954	IV	6762716	6765200	1
caenorhabditis_elegans_prjna13758	WBGene00001352	III	4303096	4313128	-1	Tsp_11871		117623	GL622790	124444
caenorhabditis_elegans_prjna13758	WBGene00010429	III	4322969	4323466	-1
caenorhabditis_elegans_prjna13758	WBGene00019275	V	4199485	4203696	1	Tsp_06988		8830202	GL622785	8831589
caenorhabditis_elegans_prjna13758	WBGene00010436	IV	13243673	13244296	1	Tsp_04322		2900039	GL622788	2902850
caenorhabditis_elegans_prjna13758	WBGene00010437	IV	13244324	13247160	1
caenorhabditis_elegans_prjna13758	WBGene00010439	IV	13247261	13250699	1
caenorhabditis_elegans_prjna13758	WBGene00004976	III	3439023	3444207	-1	Tsp_12037		107023	GL622786	113886
caenorhabditis_elegans_prjna13758	WBGene00004976	III	3439023	3444207	-1	Tsp_03836		734725	GL622788	735836
caenorhabditis_elegans_prjna13758	WBGene00000379	II	8283667	8285711	1	Tsp_08448		4259107	GL622788	4261513
caenorhabditis_elegans_prjna13758	WBGene00006562	II	8270567	8273611	1
caenorhabditis_elegans_prjna13758	WBGene00001571	II	8273543	8276231	-1
caenorhabditis_elegans_prjna13758	WBGene00010460	II	8278686	8281035	1
caenorhabditis_elegans_prjna13758	WBGene00003821	II	8280855	8283208	-1	Tsp_13264		280	GL623603	3012
caenorhabditis_elegans_prjna13758	WBGene00003821	II	8280855	8283208	-1	Tsp_02671		865708	GL622785	866935
caenorhabditis_elegans_prjna13758	WBGene00010474	V	12386286	12386765	1
caenorhabditis_elegans_prjna13758	WBGene00010465	V	12398759	12400859	-1
caenorhabditis_elegans_prjna13758	WBGene00010466	V	12401151	12401894	-1
caenorhabditis_elegans_prjna13758	WBGene00010476	III	10755624	10757640	-1
caenorhabditis_elegans_prjna13758	WBGene00010477	III	10750466	10751930	1
caenorhabditis_elegans_prjna13758	WBGene00004302	III	10746581	10747728	-1	Tsp_04091		1927840	GL622788	1928623
caenorhabditis_elegans_prjna13758	WBGene00010478	III	10748429	10750080	1	Tsp_00865	Nop60B	3427074	GL622787	3430649
caenorhabditis_elegans_prjna13758	WBGene00010480	III	10759290	10763006	1
caenorhabditis_elegans_prjna13758	WBGene00010485	IV	9708170	9709305	-1	Tsp_01983		8105151	GL622787	8107104
caenorhabditis_elegans_prjna13758	WBGene00010486	IV	9713082	9714886	1
caenorhabditis_elegans_prjna13758	WBGene00010487	I	9744242	9745990	1
caenorhabditis_elegans_prjna13758	WBGene00010495	I	8511600	8512505	-1
caenorhabditis_elegans_prjna13758	WBGene00010498	I	8517481	8526621	-1
caenorhabditis_elegans_prjna13758	WBGene00006976	I	8529380	8531338	-1
caenorhabditis_elegans_prjna13758	WBGene00019297	IV	5961690	5962132	-1
caenorhabditis_elegans_prjna13758	WBGene00010492	X	13927036	13929634	-1
caenorhabditis_elegans_prjna13758	WBGene00010493	X	13922663	13926129	-1
caenorhabditis_elegans_prjna13758	WBGene00010502	II	8080789	8086849	-1
caenorhabditis_elegans_prjna13758	WBGene00010510	V	14232281	14236076	-1	Tsp_07410	SLC29A1	1218333	GL622784	1221797
caenorhabditis_elegans_prjna13758	WBGene00019323	I	6814511	6834687	1	Tsp_05143		2177446	GL624340	2183897
caenorhabditis_elegans_prjna13758	WBGene00006740	I	6812664	6814248	1
caenorhabditis_elegans_prjna13758	WBGene00004388	III	852801	853909	-1	Tsp_15741		417	GL628032	1597
caenorhabditis_elegans_prjna13758	WBGene00004388	III	852801	853909	-1	Tsp_07086		27419	GL622784	29003
caenorhabditis_elegans_prjna13758	WBGene00019334	III	856560	860090	1	Tsp_01640	K02F3.12	6650027	GL622787	6652417
caenorhabditis_elegans_prjna13758	WBGene00019337	II	2546225	2553572	1
caenorhabditis_elegans_prjna13758	WBGene00019341	II	2525220	2529255	-1
caenorhabditis_elegans_prjna13758	WBGene00019354	V	4687974	4689231	1
caenorhabditis_elegans_prjna13758	WBGene00010523	V	11394786	11395124	-1
caenorhabditis_elegans_prjna13758	WBGene00001603	III	9943243	9944823	-1	Tsp_04186		2339558	GL622788	2341969
caenorhabditis_elegans_prjna13758	WBGene00010547	III	9941624	9942345	1
caenorhabditis_elegans_prjna13758	WBGene00010542	III	9947405	9948172	1
caenorhabditis_elegans_prjna13758	WBGene00010543	III	9945395	9946663	1
caenorhabditis_elegans_prjna13758	WBGene00019371	II	6431072	6432413	1
caenorhabditis_elegans_prjna13758	WBGene00010551	II	14441409	14447219	1	Tsp_09040		2890172	GL622784	2897954
caenorhabditis_elegans_prjna13758	WBGene00010551	II	14441409	14447219	1	Tsp_12993.1		4471	GL622797	6233
caenorhabditis_elegans_prjna13758	WBGene00010555	X	14248053	14249846	1
caenorhabditis_elegans_prjna13758	WBGene00019380	III	6889749	6895089	1
caenorhabditis_elegans_prjna13758	WBGene00019381	III	6873048	6873729	1
caenorhabditis_elegans_prjna13758	WBGene00000265	III	6885204	6889523	-1
caenorhabditis_elegans_prjna13758	WBGene00001653	IV	10197820	10202993	1
caenorhabditis_elegans_prjna13758	WBGene00019392	V	1651345	1654444	1
caenorhabditis_elegans_prjna13758	WBGene00019396	I	6358585	6360457	1
caenorhabditis_elegans_prjna13758	WBGene00003499	I	6356614	6358410	-1
caenorhabditis_elegans_prjna13758	WBGene00010568	I	8057762	8060557	1
caenorhabditis_elegans_prjna13758	WBGene00045192	I	8030959	8032886	1
caenorhabditis_elegans_prjna13758	WBGene00010562	I	8032863	8035696	-1
caenorhabditis_elegans_prjna13758	WBGene00019400	III	7162694	7165261	1
caenorhabditis_elegans_prjna13758	WBGene00010581	I	14735236	14736945	1
caenorhabditis_elegans_prjna13758	WBGene00010582	I	14742765	14747789	1
caenorhabditis_elegans_prjna13758	WBGene00001979	I	14738882	14742657	1	Tsp_14258		154	GL628835	1177
caenorhabditis_elegans_prjna13758	WBGene00001979	I	14738882	14742657	1	Tsp_08140		2086529	GL622789	2089990
caenorhabditis_elegans_prjna13758	WBGene00010583	I	14737702	14738796	1
caenorhabditis_elegans_prjna13758	WBGene00003469	II	5797893	5798341	1	Tsp_00768		3048065	GL622787	3048698
caenorhabditis_elegans_prjna13758	WBGene00003469	II	5797893	5798341	1	Tsp_00761		3076026	GL622787	3077501
caenorhabditis_elegans_prjna13758	WBGene00003469	II	5797893	5798341	1	Tsp_00756		2908432	GL622787	2908941
caenorhabditis_elegans_prjna13758	WBGene00003469	II	5797893	5798341	1	Tsp_13425		585	GL623126	965
caenorhabditis_elegans_prjna13758	WBGene00003469	II	5797893	5798341	1	Tsp_13917		820	GL624354	1264
caenorhabditis_elegans_prjna13758	WBGene00019406	II	5794495	5796185	1	Tsp_04159		2252924	GL622788	2254844
caenorhabditis_elegans_prjna13758	WBGene00003456	II	5797036	5797482	-1
caenorhabditis_elegans_prjna13758	WBGene00019409	II	5799321	5799642	-1
caenorhabditis_elegans_prjna13758	WBGene00019410	II	5800067	5801175	-1
caenorhabditis_elegans_prjna13758	WBGene00010596	V	9480472	9480923	-1
caenorhabditis_elegans_prjna13758	WBGene00019429	I	6473207	6476756	1
caenorhabditis_elegans_prjna13758	WBGene00019430	I	6468113	6469392	1
caenorhabditis_elegans_prjna13758	WBGene00019431	I	6466752	6467515	1
caenorhabditis_elegans_prjna13758	WBGene00019432	I	6460433	6464286	1
caenorhabditis_elegans_prjna13758	WBGene00000386	I	6469386	6471995	-1	Tsp_13015.2		3440	GL624006	4762
caenorhabditis_elegans_prjna13758	WBGene00000386	I	6469386	6471995	-1	Tsp_13015.1		4885	GL624006	5857
caenorhabditis_elegans_prjna13758	WBGene00005920	V	15696785	15698199	-1
caenorhabditis_elegans_prjna13758	WBGene00019439	IV	4188673	4195894	1
caenorhabditis_elegans_prjna13758	WBGene00019441	IV	4189939	4192931	-1
caenorhabditis_elegans_prjna13758	WBGene00019449	V	588135	589646	1
caenorhabditis_elegans_prjna13758	WBGene00019450	V	585848	587250	1
caenorhabditis_elegans_prjna13758	WBGene00001743	III	8085705	8088449	1	Tsp_07750		10455066	GL622785	10459060
caenorhabditis_elegans_prjna13758	WBGene00001743	III	8085705	8088449	1	Tsp_07751		10450077	GL622785	10454827
caenorhabditis_elegans_prjna13758	WBGene00000143	III	8080570	8083701	1
caenorhabditis_elegans_prjna13758	WBGene00019458	III	8083692	8085538	-1
caenorhabditis_elegans_prjna13758	WBGene00019459	III	8096736	8098216	-1
caenorhabditis_elegans_prjna13758	WBGene00010608	I	9582682	9583533	-1
caenorhabditis_elegans_prjna13758	WBGene00004312	I	9616508	9618107	-1	Tsp_09779	Caf1	6278927	GL622789	6281525
caenorhabditis_elegans_prjna13758	WBGene00003036	I	9618207	9619760	-1	Tsp_05180		2317375	GL624340	2320982
caenorhabditis_elegans_prjna13758	WBGene00010611	I	9588710	9589931	-1
caenorhabditis_elegans_prjna13758	WBGene00010621	I	8676666	8681325	-1
caenorhabditis_elegans_prjna13758	WBGene00010623	I	8693451	8695159	-1
caenorhabditis_elegans_prjna13758	WBGene00000098	V	8221410	8223587	1	Tsp_11544		715159	GL622790	716583
caenorhabditis_elegans_prjna13758	WBGene00000098	V	8221410	8223587	1	Tsp_07501		1630867	GL622784	1634897
caenorhabditis_elegans_prjna13758	WBGene00010627	V	10350471	10352978	-1	Tsp_01355		5425299	GL622787	5431142
caenorhabditis_elegans_prjna13758	WBGene00010629	V	10353584	10355837	-1	Tsp_12584		126	GL629434	472
caenorhabditis_elegans_prjna13758	WBGene00010631	V	10362261	10366014	1	Tsp_07628		10016715	GL622785	10019021
caenorhabditis_elegans_prjna13758	WBGene00010631	V	10362261	10366014	1	Tsp_12829		86	GL626847	4124
caenorhabditis_elegans_prjna13758	WBGene00010631	V	10362261	10366014	1	Tsp_13376		1642	GL625564	3433
caenorhabditis_elegans_prjna13758	WBGene00010631	V	10362261	10366014	1	Tsp_16111		44	GL625891	868
caenorhabditis_elegans_prjna13758	WBGene00004467	II	4043059	4044330	-1	Tsp_02191		9067370	GL622787	9073376
caenorhabditis_elegans_prjna13758	WBGene00019498	II	641010	650367	-1	Tsp_04053		1720811	GL622788	1722025
caenorhabditis_elegans_prjna13758	WBGene00023321	II	656054	656180	-1
caenorhabditis_elegans_prjna13758	WBGene00006050	IV	9852550	9853609	1
caenorhabditis_elegans_prjna13758	WBGene00010638	IV	9862221	9864076	1
caenorhabditis_elegans_prjna13758	WBGene00003425	IV	9837616	9838065	1	Tsp_00768		3048065	GL622787	3048698
caenorhabditis_elegans_prjna13758	WBGene00003425	IV	9837616	9838065	1	Tsp_00761		3076026	GL622787	3077501
caenorhabditis_elegans_prjna13758	WBGene00003425	IV	9837616	9838065	1	Tsp_00756		2908432	GL622787	2908941
caenorhabditis_elegans_prjna13758	WBGene00003425	IV	9837616	9838065	1	Tsp_13425		585	GL623126	965
caenorhabditis_elegans_prjna13758	WBGene00003425	IV	9837616	9838065	1	Tsp_13917		820	GL624354	1264
caenorhabditis_elegans_prjna13758	WBGene00003449	IV	9841443	9841961	1	Tsp_00768		3048065	GL622787	3048698
caenorhabditis_elegans_prjna13758	WBGene00003449	IV	9841443	9841961	1	Tsp_00761		3076026	GL622787	3077501
caenorhabditis_elegans_prjna13758	WBGene00003449	IV	9841443	9841961	1	Tsp_00756		2908432	GL622787	2908941
caenorhabditis_elegans_prjna13758	WBGene00003449	IV	9841443	9841961	1	Tsp_13425		585	GL623126	965
caenorhabditis_elegans_prjna13758	WBGene00003449	IV	9841443	9841961	1	Tsp_13917		820	GL624354	1264
caenorhabditis_elegans_prjna13758	WBGene00002206	IV	9839057	9841084	-1	Tsp_12784		3362	GL624279	5110
caenorhabditis_elegans_prjna13758	WBGene00002206	IV	9839057	9841084	-1	Tsp_06641	Fps85D	11546255	GL622787	11548147
caenorhabditis_elegans_prjna13758	WBGene00002206	IV	9839057	9841084	-1	Tsp_11870		113432	GL622790	117458
caenorhabditis_elegans_prjna13758	WBGene00010633	IV	9844014	9844344	1
caenorhabditis_elegans_prjna13758	WBGene00010634	IV	9844989	9846674	-1
caenorhabditis_elegans_prjna13758	WBGene00010635	IV	9847724	9848175	-1
caenorhabditis_elegans_prjna13758	WBGene00010636	IV	9848491	9849796	-1
caenorhabditis_elegans_prjna13758	WBGene00006963	I	7159714	7160917	1	Tsp_10304		6956512	GL622792	6958770
caenorhabditis_elegans_prjna13758	WBGene00006963	I	7159714	7160917	1	Tsp_10305		6958884	GL622792	6959468
caenorhabditis_elegans_prjna13758	WBGene00019503	IV	8294690	8297283	1	Tsp_02571		502140	GL622785	505244
caenorhabditis_elegans_prjna13758	WBGene00019510	IV	8286587	8289531	-1	Tsp_06160		7052599	GL622785	7056347
caenorhabditis_elegans_prjna13758	WBGene00019509	IV	8285175	8286566	-1
caenorhabditis_elegans_prjna13758	WBGene00019512	II	2991613	2994313	1
caenorhabditis_elegans_prjna13758	WBGene00010650	I	11484778	11486598	-1
caenorhabditis_elegans_prjna13758	WBGene00010651	I	11486895	11488471	-1
caenorhabditis_elegans_prjna13758	WBGene00004386	IV	4174089	4176279	1	Tsp_09888		320650	GL623393	321722
caenorhabditis_elegans_prjna13758	WBGene00004385	IV	4172076	4173988	1	Tsp_09888		320650	GL623393	321722
caenorhabditis_elegans_prjna13758	WBGene00019530	IV	4164692	4166230	1
caenorhabditis_elegans_prjna13758	WBGene00019531	IV	4162517	4164481	1
caenorhabditis_elegans_prjna13758	WBGene00003947	IV	1708804	1709745	-1
caenorhabditis_elegans_prjna13758	WBGene00000875	III	13768541	13771242	-1	Tsp_00839		3530850	GL622787	3535555
caenorhabditis_elegans_prjna13758	WBGene00000875	III	13768541	13771242	-1	Tsp_00838		3537055	GL622787	3539471
caenorhabditis_elegans_prjna13758	WBGene00000875	III	13768541	13771242	-1	Tsp_13966		308	GL623889	616
caenorhabditis_elegans_prjna13758	WBGene00000875	III	13768541	13771242	-1	Tsp_02108		8728385	GL622787	8731257
caenorhabditis_elegans_prjna13758	WBGene00010666	IV	12055670	12056656	-1
caenorhabditis_elegans_prjna13758	WBGene00010669	IV	12068890	12074914	1
[truncated: 1,522 more rows]

## Sheet: BEDTOOLS intersect
		Total Trichinella spiralis germline genes:		1570
								P-values	P-values
Genome annotation	SL screening match	Annotation correction	Genes overlapping operons	% of total	Expressed genes	Operonic genes	% of expressed	Chi-square	Binomial
BRAKER	10 bp	corrected	190	0.121019	14903	923	0.0619338	2.65704e-22	4.78912e-18
BRAKER	10 bp	uncorrected	189	0.120382	14561	789	0.0529424	4.84608e-31	6.1234e-24
BRAKER	8 bp	corrected	216	0.13758	15013	1004	0.067369	3.44882e-29	3.24968e-23
BRAKER	8 bp	uncorrected	206	0.13121	14561	851	0.0571026	1.01203e-34	1.16672e-26
BRAKER+TRINITY	10 bp	corrected	180	0.11465	17925	922	0.0618667	8.37653e-30	5.68111e-23
BRAKER+TRINITY	10 bp	uncorrected	169	0.107643	17633	805	0.054016	5.73783e-32	4.62337e-24
BRAKER+TRINITY	8 bp	corrected	203	0.129299	18031	992	0.0665638	4.02234e-38	1.20829e-28
BRAKER+TRINITY	8 bp	uncorrected	193	0.12293	17633	866	0.0581091	9.75814e-42	1.43022e-30
DENOVO_ALL	10 bp	corrected	215	0.136943	18119	963	0.0646179	1.45422e-49	6.47619e-36
DENOVO_ALL	10 bp	uncorrected	163	0.103822	17244	618	0.0414682	1.3796e-47	1.17076e-32
DENOVO_ALL	8 bp	corrected	243	0.154777	18347	1045	0.0701201	8.79754e-63	1.69526e-44
DENOVO_ALL	8 bp	uncorrected	179	0.114013	17244	648	0.0434812	4.22943e-57	2.31621e-38
REFERENCE	10 bp	corrected	184	0.117197	15273	763	0.0511977	2.1647e-34	6.26561e-26
REFERENCE	10 bp	uncorrected	163	0.103822	15024	663	0.0444877	1.0949e-30	4.05322e-23
REFERENCE	8 bp	corrected	207	0.131847	15364	824	0.0552909	4.6718e-43	7.7867e-32
REFERENCE	8 bp	uncorrected	183	0.116561	15025	701	0.0470375	2.11601e-39	7.08285e-29
STRINGTIE	10 bp	corrected	185	0.117834	13677	841	0.0564316	1.49341e-20	6.99407e-17
STRINGTIE	10 bp	uncorrected	145	0.0923567	12973	551	0.0369724	1.11269e-22	1.16865e-17
STRINGTIE	8 bp	corrected	200	0.127389	13866	908	0.0609273	3.56668e-23	8.81125e-19
STRINGTIE	8 bp	uncorrected	159	0.101274	12973	584	0.0391867	5.86885e-27	1.03619e-20
