# Supplementary material
Source: HighWire-hosted journal article supplement (doi:10.1101/rna.076414.120)
Supplement: Supplemental_Table_S8.xlsx [file Supplemental_Table_S8.xlsx]

## Sheet: Legend
Supplemental Table S8. GeneOntology annotation and enrichment of operonic genes. Numbers of genes, proteins and associated GeneOntology IDs are presented for five sets of gene annotations (reference annotation and four de novo annotations) as well as the corresponding sets of operonic genes. Enrichment-test results are presented for all enriched GO terms in the biological process ontology across …

## Sheet: GO annotation statistics
Background GO annotations
Annotation		Genes	Proteins	GOIDs
BRAKER		12436	66479	2922
BRAKER+TRINITY		14444	69177	2989
DENOVO_ALL		6901	55368	2699
REFERENCE		12376	64722	3210
STRINGTIE		6758	52055	2690
GO Annotations of operonic genes
Genome annotations	TSL screening stringency	Genes	Proteins	GO IDs	Enriched GO IDs (BP)
BRAKER	10 bp	789	727	857	74
BRAKER	8 bp	851	778	885	66
BRAKER+TRINITY	10 bp	805	740	833	95
BRAKER+TRINITY	8 bp	866	791	871	83
DENOVO_ALL	10 bp	618	450	659	3
DENOVO_ALL	8 bp	648	465	673	0
REFERENCE	10 bp	663	592	856	9
REFERENCE	8 bp	701	627	892	4
STRINGTIE	10 bp	551	457	633	0
STRINGTIE	8 bp	584	481	655	0

## Sheet: GO BP enrichment
ontology	node_id	node_name	raw_p_overrep	qval
biological_process	GO:0000288	nuclear-transcribed mRNA catabolic process, deadenylation-dependent decay	0.000227124	0.0172362
biological_process	GO:0000290	deadenylation-dependent decapping of nuclear-transcribed mRNA	0.000909933	0.0431586
biological_process	GO:0000956	nuclear-transcribed mRNA catabolic process	0.000702019	0.0341357
biological_process	GO:0001510	RNA methylation	0.000381115	0.0205274
biological_process	GO:0002943	tRNA dihydrouridine synthesis	6.28514e-06	0.000709816
biological_process	GO:0006072	glycerol-3-phosphate metabolic process	0.000909933	0.0431586
biological_process	GO:0006082	organic acid metabolic process	0.000482937	0.0247855
biological_process	GO:0006091	generation of precursor metabolites and energy	1.27629e-10	2.17927e-07
biological_process	GO:0006352	DNA-templated transcription, initiation	0.000868726	0.0431586
biological_process	GO:0006364	rRNA processing	0.000379838	0.0207783
biological_process	GO:0006367	transcription initiation from RNA polymerase II promoter	0.000377704	0.0205274
biological_process	GO:0006379	mRNA cleavage	0.000101675	0.00726457
biological_process	GO:0006396	RNA processing	2.25765e-10	4.14338e-07
biological_process	GO:0006399	tRNA metabolic process	3.87729e-08	9.04959e-06
biological_process	GO:0006400	tRNA modification	0.000600986	0.0288227
biological_process	GO:0006401	RNA catabolic process	0.000379838	0.0207783
biological_process	GO:0006412	translation	0.000129557	0.0089225
biological_process	GO:0006418	tRNA aminoacylation for protein translation	0.000633053	0.0316617
biological_process	GO:0006431	methionyl-tRNA aminoacylation	0.0011431	0.0439779
biological_process	GO:0006436	tryptophanyl-tRNA aminoacylation	0.000596847	0.0288227
biological_process	GO:0006446	regulation of translational initiation	0.000332964	0.0194284
biological_process	GO:0006457	protein folding	1.66289e-05	0.00157345
biological_process	GO:0006480	N-terminal protein amino acid methylation	0.000300845	0.0172665
biological_process	GO:0006511	ubiquitin-dependent protein catabolic process	0.000639518	0.0294769
biological_process	GO:0006518	peptide metabolic process	2.42466e-05	0.00218131
biological_process	GO:0006633	fatty acid biosynthetic process	0.00109521	0.0439779
biological_process	GO:0006720	isoprenoid metabolic process	1.52891e-05	0.00157345
biological_process	GO:0006732	coenzyme metabolic process	0.00068513	0.0307518
biological_process	GO:0006790	sulfur compound metabolic process	0.000734768	0.0386036
biological_process	GO:0006810	transport	5.27667e-08	1.1546e-05
biological_process	GO:0006820	anion transport	0.00123579	0.0460268
biological_process	GO:0006869	lipid transport	6.71419e-05	0.00511008
biological_process	GO:0006886	intracellular protein transport	8.73135e-07	0.000160887
biological_process	GO:0007005	mitochondrion organization	0.00100047	0.0432424
biological_process	GO:0008033	tRNA processing	2.77331e-06	0.000346763
biological_process	GO:0008104	protein localization	1.57862e-06	0.000212567
biological_process	GO:0008272	sulfate transport	0.00113045	0.0439779
biological_process	GO:0008299	isoprenoid biosynthetic process	9.40124e-06	0.000997386
biological_process	GO:0008610	lipid biosynthetic process	0.000230714	0.0139264
biological_process	GO:0009056	catabolic process	8.38861e-08	2.43865e-05
biological_process	GO:0009057	macromolecule catabolic process	8.5125e-06	0.00103814
biological_process	GO:0009058	biosynthetic process	0.000116957	0.00811525
biological_process	GO:0009108	coenzyme biosynthetic process	0.00100763	0.0435522
biological_process	GO:0009435	NAD biosynthetic process	0.000270137	0.0160297
biological_process	GO:0009451	RNA modification	2.47541e-08	7.22201e-06
biological_process	GO:0010038	response to metal ion	0.0011431	0.0439779
biological_process	GO:0010467	gene expression	2.47885e-10	4.17879e-07
biological_process	GO:0010876	lipid localization	0.000129676	0.00856596
biological_process	GO:0015031	protein transport	7.06811e-07	0.000137475
biological_process	GO:0015698	inorganic anion transport	0.00122698	0.0460268
biological_process	GO:0015833	peptide transport	9.42901e-07	0.000163715
biological_process	GO:0015980	energy derivation by oxidation of organic compounds	0.000577971	0.0288227
biological_process	GO:0016043	cellular component organization	0.000580654	0.0347883
biological_process	GO:0016070	RNA metabolic process	1.05564e-09	6.15967e-07
biological_process	GO:0016071	mRNA metabolic process	4.5826e-05	0.00373109
biological_process	GO:0016072	rRNA metabolic process	0.000511535	0.0271346
biological_process	GO:0016192	vesicle-mediated transport	0.000343792	0.0194131
biological_process	GO:0019637	organophosphate metabolic process	4.22847e-06	0.000510479
biological_process	GO:0019752	carboxylic acid metabolic process	0.000676946	0.0307518
biological_process	GO:0019941	modification-dependent protein catabolic process	0.000932169	0.040794
biological_process	GO:0022613	ribonucleoprotein complex biogenesis	2.48138e-05	0.00218131
biological_process	GO:0022900	electron transport chain	7.70469e-10	8.77051e-07
biological_process	GO:0030163	protein catabolic process	0.000612856	0.0289947
biological_process	GO:0032259	methylation	3.95645e-06	0.000577148
biological_process	GO:0033036	macromolecule localization	1.29703e-09	6.48701e-07
biological_process	GO:0033108	mitochondrial respiratory chain complex assembly	0.000720711	0.0384567
biological_process	GO:0034470	ncRNA processing	1.07066e-09	6.38791e-07
biological_process	GO:0034613	cellular protein localization	1.07554e-06	0.000163715
biological_process	GO:0034660	ncRNA metabolic process	1.14821e-11	4.01989e-08
biological_process	GO:0042254	ribosome biogenesis	9.35959e-05	0.0069719
biological_process	GO:0042886	amide transport	1.03671e-06	0.000163715
biological_process	GO:0043038	amino acid activation	0.000820299	0.0363527
biological_process	GO:0043039	tRNA aminoacylation	0.000820299	0.0363527
biological_process	GO:0043043	peptide biosynthetic process	5.63535e-05	0.00448394
biological_process	GO:0043414	macromolecule methylation	8.76964e-05	0.00667446
biological_process	GO:0043436	oxoacid metabolic process	0.000450664	0.0235489
biological_process	GO:0043603	cellular amide metabolic process	1.04549e-05	0.00114383
biological_process	GO:0043604	amide biosynthetic process	3.65395e-05	0.002975
biological_process	GO:0043632	modification-dependent macromolecule catabolic process	0.000932169	0.040794
biological_process	GO:0044085	cellular component biogenesis	0.000144275	0.0095303
biological_process	GO:0044248	cellular catabolic process	2.65724e-06	0.000422863
biological_process	GO:0044249	cellular biosynthetic process	0.000118217	0.00811525
biological_process	GO:0044255	cellular lipid metabolic process	4.36337e-05	0.00363718
biological_process	GO:0044265	cellular macromolecule catabolic process	2.20562e-05	0.00218131
biological_process	GO:0044267	cellular protein metabolic process	0.000170467	0.010851
biological_process	GO:0044281	small molecule metabolic process	5.87354e-06	0.000685442
biological_process	GO:0045184	establishment of protein localization	1.25101e-06	0.000175191
biological_process	GO:0045333	cellular respiration	0.00122698	0.0460268
biological_process	GO:0046168	glycerol-3-phosphate catabolic process	0.000414539	0.0255458
biological_process	GO:0046907	intracellular transport	5.58401e-09	2.17218e-06
biological_process	GO:0051179	localization	1.28643e-08	4.09436e-06
biological_process	GO:0051186	cofactor metabolic process	4.19159e-05	0.00357921
biological_process	GO:0051188	cofactor biosynthetic process	1.62798e-05	0.00157345
biological_process	GO:0051234	establishment of localization	2.69774e-08	7.26522e-06
biological_process	GO:0051604	protein maturation	0.000169767	0.0110065
biological_process	GO:0051641	cellular localization	4.43434e-10	4.14338e-07
biological_process	GO:0051643	endoplasmic reticulum localization	2.00935e-05	0.00180377
biological_process	GO:0052646	alditol phosphate metabolic process	0.000909933	0.0431586
biological_process	GO:0055114	oxidation-reduction process	1.0048e-10	2.17927e-07
biological_process	GO:0061817	endoplasmic reticulum-plasma membrane tethering	2.00935e-05	0.00180377
biological_process	GO:0070507	regulation of microtubule cytoskeleton organization	0.00109521	0.0439779
biological_process	GO:0070647	protein modification by small protein conjugation or removal	0.000325849	0.0231828
biological_process	GO:0070727	cellular macromolecule localization	1.07554e-06	0.000163715
biological_process	GO:0071702	organic substance transport	5.03257e-09	2.17218e-06
biological_process	GO:0071705	nitrogen compound transport	1.21381e-06	0.000175191
biological_process	GO:0071840	cellular component organization or biogenesis	1.02736e-05	0.00206379
biological_process	GO:0090305	nucleic acid phosphodiester bond hydrolysis	0.000639887	0.0294769
biological_process	GO:0098656	anion transmembrane transport	0.0012968	0.0477905
biological_process	GO:0110154	RNA decapping	0.000909933	0.0431586
biological_process	GO:0110156	methylguanosine-cap decapping	0.000909933	0.0431586
biological_process	GO:1901136	carbohydrate derivative catabolic process	1.25608e-05	0.00204262
biological_process	GO:1901565	organonitrogen compound catabolic process	0.000125319	0.00843736
biological_process	GO:1901575	organic substance catabolic process	2.51932e-07	5.56906e-05
biological_process	GO:1901576	organic substance biosynthetic process	0.000283884	0.0165646
biological_process	GO:1902358	sulfate transmembrane transport	0.00113045	0.0439779

## Sheet: REVIGO SimRel0.4
term_ID	description	frequency	plot_X	plot_Y	plot_size	log10 p-value	uniqueness	dispensability	representative	eliminated
GO:0009451	RNA modification	0.01778	-6.423	2.891	5.358	-300	0.736	0	9451	0
GO:0008033	tRNA processing	0.01345	null	null	5.237	-300	0.69	0.82	9451	1
GO:0016070	RNA metabolic process	0.15951	null	null	6.311	-300	0.715	0.464	9451	1
GO:0016072	rRNA metabolic process	0.00965	null	null	5.093	-3.2924	0.714	0.773	9451	1
GO:0043414	macromolecule methylation	0.01255	null	null	5.207	-4.0458	0.806	0.499	9451	1
GO:0002943	tRNA dihydrouridine synthesis	0.0008	null	null	4.012	-5	0.735	0.609	9451	1
GO:0070647	protein modification by small protein conjugation or removal	0.00821	null	null	5.023	-3.4815	0.79	0.475	9451	1
GO:0006418	tRNA aminoacylation for protein translation	0.01099	null	null	5.149	-3.2007	0.573	0.785	9451	1
GO:0006396	RNA processing	0.0321	null	null	5.615	-300	0.731	0.413	9451	1
GO:0001510	RNA methylation	0.00739	null	null	4.977	-3.4202	0.737	0.725	9451	1
GO:0006400	tRNA modification	0.00914	null	null	5.069	-3.2218	0.678	0.827	9451	1
GO:0006399	tRNA metabolic process	0.02495	null	null	5.505	-300	0.687	0.871	9451	1
GO:0006436	tryptophanyl-tRNA aminoacylation	0.00054	null	null	3.843	-3.2218	0.665	0.576	9451	1
GO:0006431	methionyl-tRNA aminoacylation	0.00055	null	null	3.845	-2.9431	0.665	0.593	9451	1
GO:0034470	ncRNA processing	0.02222	null	null	5.455	-300	0.683	0.426	9451	1
GO:0043039	tRNA aminoacylation	0.01124	null	null	5.159	-3.0862	0.623	0.986	9451	1
GO:0034660	ncRNA metabolic process	0.03407	null	null	5.641	-300	0.737	0.453	9451	1
GO:0010038	response to metal ion	0.00132	5.109	1.128	4.229	-2.9431	0.982	0	10038	0
GO:0022613	ribonucleoprotein complex biogenesis	0.01614	5.81	2.652	5.316	-4.699	0.912	0	22613	0
GO:0070507	regulation of microtubule cytoskeleton organization	0.0006	null	null	3.886	-2.9586	0.857	0.497	22613	1
GO:0016043	cellular component organization	0.07239	null	null	5.968	-3.2366	0.861	0.78	22613	1
GO:0042254	ribosome biogenesis	0.01422	null	null	5.261	-4.0458	0.909	0.715	22613	1
GO:0006364	rRNA processing	0.00952	null	null	5.087	-3.4202	0.645	0.912	22613	1
GO:0033108	mitochondrial respiratory chain complex assembly	0.00061	null	null	3.896	-3.1427	0.894	0.52	22613	1
GO:0007005	mitochondrion organization	0.00418	null	null	4.729	-3	0.887	0.468	22613	1
GO:0044085	cellular component biogenesis	0.04355	null	null	5.747	-3.8539	0.914	0.619	22613	1
GO:0051179	localization	0.18495	2.699	-0.041	6.375	-300	0.985	0	51179	0
GO:0051641	cellular localization	0.02041	2.206	5.781	5.418	-300	0.848	0	51641	0
GO:0071840	cellular component organization or biogenesis	0.08568	5.433	-2.223	6.041	-5	0.984	0	71840	0
GO:0032259	methylation	0.03103	6.275	-0.76	5.6	-300	0.958	0.019	32259	0
GO:0009056	catabolic process	0.0482	-2.429	8.145	5.791	-300	0.957	0.021	9056	0
GO:0009058	biosynthetic process	0.31611	3.391	-2.375	6.608	-3.9208	0.951	0.033	9058	0
GO:0006457	protein folding	0.00903	1.005	1.444	5.064	-4.699	0.94	0.037	6457	0
GO:0052646	alditol phosphate metabolic process	0.00123	3.051	-4.362	4.199	-3.041	0.885	0.055	52646	0
GO:1901575	organic substance catabolic process	0.04612	-1.136	6.289	5.772	-300	0.769	0.063	1901575	0
GO:0046168	glycerol-3-phosphate catabolic process	0.00048	null	null	3.787	-3.3872	0.792	0.538	1901575	1
GO:0030163	protein catabolic process	0.00997	null	null	5.107	-3.2147	0.718	0.86	1901575	1
GO:0009057	macromolecule catabolic process	0.01953	null	null	5.399	-5	0.749	0.823	1901575	1
GO:0044248	cellular catabolic process	0.03266	null	null	5.622	-300	0.752	0.888	1901575	1
GO:0044265	cellular macromolecule catabolic process	0.01268	null	null	5.211	-4.699	0.707	0.775	1901575	1
GO:0006072	glycerol-3-phosphate metabolic process	0.00121	null	null	4.192	-3.041	0.875	0.932	1901575	1
GO:0019941	modification-dependent protein catabolic process	0.00612	null	null	4.895	-3.0315	0.692	0.985	1901575	1
GO:0043632	modification-dependent macromolecule catabolic process	0.00627	null	null	4.905	-3.0315	0.717	0.844	1901575	1
GO:0006401	RNA catabolic process	0.00395	null	null	4.705	-3.4202	0.666	0.779	1901575	1
GO:1901565	organonitrogen compound catabolic process	0.01195	null	null	5.186	-3.8861	0.728	0.769	1901575	1
GO:1901136	carbohydrate derivative catabolic process	0.00423	null	null	4.735	-5	0.799	0.676	1901575	1
GO:0006511	ubiquitin-dependent protein catabolic process	0.00584	null	null	4.874	-3.1938	0.693	0.811	1901575	1
GO:0022900	electron transport chain	0.00564	-1.741	-6.964	4.86	-300	0.84	0.065	22900	0
GO:0045333	cellular respiration	0.00984	null	null	5.101	-2.9101	0.832	0.853	22900	1
GO:0015980	energy derivation by oxidation of organic compounds	0.01175	null	null	5.178	-3.2366	0.829	0.804	22900	1
GO:0006091	generation of precursor metabolites and energy	0.0194	1.351	-6.271	5.396	-300	0.897	0.075	6091	0
GO:0006790	sulfur compound metabolic process	0.01822	3.388	-5.957	5.369	-3.1367	0.898	0.075	6790	0
GO:0051186	cofactor metabolic process	0.03985	-1.195	-2.8	5.709	-4.3979	0.89	0.083	51186	0
GO:0051604	protein maturation	0.00293	-3.576	1.775	4.575	-3.7696	0.845	0.114	51604	0
GO:0008299	isoprenoid biosynthetic process	0.00442	-4.687	-5.647	4.754	-5	0.801	0.176	8299	0
GO:0044255	cellular lipid metabolic process	0.02704	null	null	5.54	-4.3979	0.795	0.715	8299	1
GO:0006633	fatty acid biosynthetic process	0.00617	null	null	4.899	-2.9586	0.763	0.742	8299	1
GO:0008610	lipid biosynthetic process	0.02123	null	null	5.435	-3.6383	0.792	0.865	8299	1
GO:0006720	isoprenoid metabolic process	0.00464	null	null	4.775	-4.699	0.824	0.719	8299	1
GO:0051643	endoplasmic reticulum localization	1e-05	3.561	4.642	2.127	-4.699	0.883	0.179	51643	0
GO:0061817	endoplasmic reticulum-plasma membrane tethering	0	null	null	1.708	-4.699	0.888	0.51	51643	1
GO:0051188	cofactor biosynthetic process	0.02763	-6.776	-4.204	5.55	-4.699	0.824	0.187	51188	0
GO:0009108	coenzyme biosynthetic process	0.01983	null	null	5.406	-2.9957	0.828	0.824	51188	1
GO:0006732	coenzyme metabolic process	0.03111	null	null	5.601	-3.1612	0.857	0.877	51188	1
GO:0009435	NAD biosynthetic process	0.00246	null	null	4.499	-3.5686	0.712	0.645	51188	1
GO:0010467	gene expression	0.19671	-5.502	5.117	6.402	-300	0.833	0.199	10467	0
GO:0043603	cellular amide metabolic process	0.06879	-8.062	-0.894	5.946	-5	0.821	0.211	43603	0
GO:0006446	regulation of translational initiation	0.00091	-5.48	-1.305	4.067	-3.4815	0.771	0.214	6446	0
GO:0006518	peptide metabolic process	0.05961	null	null	5.884	-4.699	0.751	0.508	6446	1
GO:0006412	translation	0.05686	null	null	5.863	-3.8861	0.666	0.877	6446	1
GO:0043604	amide biosynthetic process	0.06374	null	null	5.913	-4.3979	0.741	0.895	6446	1
GO:0043043	peptide biosynthetic process	0.0577	null	null	5.869	-4.2218	0.725	0.927	6446	1
GO:0043038	amino acid activation	0.01124	-3.951	-4.929	5.159	-3.0862	0.757	0.246	43038	0
GO:0043436	oxoacid metabolic process	0.09006	null	null	6.063	-3.3468	0.76	0.902	43038	1
GO:0019752	carboxylic acid metabolic process	0.08831	null	null	6.054	-3.1675	0.76	0.634	43038	1
GO:0006082	organic acid metabolic process	0.09086	null	null	6.067	-3.3188	0.777	0.664	43038	1
GO:0055114	oxidation-reduction process	0.1506	-2.724	-6.803	6.286	-300	0.873	0.246	55114	0
GO:0044281	small molecule metabolic process	0.15138	null	null	6.288	-5	0.873	0.415	55114	1
GO:0006379	mRNA cleavage	0.00046	-7.257	4.264	3.775	-4	0.798	0.264	6379	0
GO:0000290	deadenylation-dependent decapping of nuclear-transcribed mRNA	0.00019	null	null	3.386	-3.041	0.72	0.816	6379	1
GO:0000288	nuclear-transcribed mRNA catabolic process, deadenylation-dependent decay	0.00051	null	null	3.82	-3.6383	0.701	0.629	6379	1
GO:0000956	nuclear-transcribed mRNA catabolic process	0.00137	null	null	4.244	-3.1549	0.681	0.854	6379	1
GO:0015833	peptide transport	0.00298	1.563	6.66	4.582	-300	0.849	0.283	15833	0
GO:0015031	protein transport	0.02251	null	null	5.461	-300	0.782	0.593	15833	1
GO:0070727	cellular macromolecule localization	0.01561	null	null	5.302	-300	0.777	0.888	15833	1
GO:0042886	amide transport	0.00337	null	null	4.636	-300	0.861	0.689	15833	1
GO:0006869	lipid transport	0.0027	null	null	4.539	-4.1549	0.789	0.698	15833	1
GO:0010876	lipid localization	0.00296	null	null	4.579	-3.8861	0.826	0.705	15833	1
GO:0006886	intracellular protein transport	0.01199	null	null	5.187	-300	0.772	0.885	15833	1
GO:0046907	intracellular transport	0.01564	null	null	5.302	-300	0.81	0.937	15833	1
GO:0034613	cellular protein localization	0.01546	null	null	5.297	-300	0.775	0.953	15833	1
GO:0008104	protein localization	0.02626	null	null	5.527	-300	0.788	0.912	15833	1
GO:0045184	establishment of protein localization	0.02407	null	null	5.49	-300	0.786	0.943	15833	1
GO:0006367	transcription initiation from RNA polymerase II promoter	0.00109	-7.095	0.571	4.144	-3.4202	0.784	0.284	6367	0
GO:0090305	nucleic acid phosphodiester bond hydrolysis	0.02271	-7.491	1.989	5.464	-3.1938	0.777	0.309	90305	0
GO:0006480	N-terminal protein amino acid methylation	0.0001	-3.25	4.556	3.103	-3.5229	0.84	0.316	6480	0
GO:0016192	vesicle-mediated transport	0.01085	2.304	6.338	5.144	-3.4685	0.854	0.327	16192	0
GO:0044249	cellular biosynthetic process	0.30048	-5.829	-3.212	6.586	-3.9208	0.806	0.329	44249	0
GO:1901576	organic substance biosynthetic process	0.30365	null	null	6.591	-3.5528	0.833	0.658	44249	1
GO:0006352	DNA-templated transcription, initiation	0.00766	-6.492	0.306	4.992	-3.0605	0.746	0.347	6352	0
GO:0071705	nitrogen compound transport	0.01767	2.788	5.809	5.355	-300	0.847	0.347	71705	0
GO:0008272	sulfate transport	0.0015	null	null	4.284	-2.9469	0.818	0.919	71705	1
GO:0051234	establishment of localization	0.17756	null	null	6.358	-300	0.807	0.794	71705	1
GO:0006820	anion transport	0.01956	null	null	5.4	-2.9066	0.827	0.413	71705	1
GO:0006810	transport	0.17616	null	null	6.354	-300	0.804	0.6	71705	1
GO:0033036	macromolecule localization	0.0303	null	null	5.59	-300	0.842	0.423	71705	1
GO:0098656	anion transmembrane transport	0.01012	null	null	5.113	-2.8861	0.827	0.826	71705	1
GO:1902358	sulfate transmembrane transport	0.00149	null	null	4.282	-2.9469	0.818	0.686	71705	1
GO:0071702	organic substance transport	0.0498	null	null	5.805	-300	0.83	0.407	71705	1
GO:0015698	inorganic anion transport	0.00872	null	null	5.049	-2.9101	0.829	0.639	71705	1
GO:0016071	mRNA metabolic process	0.00798	-7.406	2.844	5.01	-4.301	0.772	0.348	16071	0
GO:0044267	cellular protein metabolic process	0.14293	-4.983	2.099	6.263	-3.7696	0.757	0.354	44267	0
GO:0019637	organophosphate metabolic process	0.06148	0.663	-4.395	5.897	-300	0.857	0.365	19637	0
